# Supplementary material for: Gardenia jasminoides J. Ellis extract alleviated white matter damage through promoting the differentiation of oligodendrocyte precursor cells via suppressing neuroinflammation
Source: Royal Society of Chemistry journal article supplement (doi:10.1039/d1fo02127c), 2022-01-01
Supplement: d1fo02127c1.xlsx [file d1fo02127c1.xlsx]

## Sheet: Protein Report
NO.	Accession	Description	# Unique Peptides	MW [kDa]	Score	Coverage (%)	APP/PS1-皮层_vs_WT-皮层（115/113）	20mg/kg-皮层_vs_APP/PS1-皮层（117/115）	50mg/kg-皮层_vs_APP/PS1-皮层（119/115）	APP/PS1-海马_vs_WT-海马（116/114）	20mg/kg-海马_vs_APP/PS1-海马（118/116）	50mg/kg-海马_vs_APP/PS1-海马（121/116）
1	P16546	Spectrin alpha chain, non-erythrocytic 1 OS=Mus musculus GN=Sptan1 PE=1 SV=4 - [SPTN1_MOUSE]	174	284.422	8220.96	67.96	0.942186	1.12142	1.12443	1.00906	0.946685	0.966238
2	Q9JHU4	Cytoplasmic dynein 1 heavy chain 1 OS=Mus musculus GN=Dync1h1 PE=1 SV=2 - [DYHC1_MOUSE]	146	531.71	2853.52	33.66	0.951851	1.09193	1.073	1.00869	0.985544	0.997849
3	Q9QXS1	Plectin OS=Mus musculus GN=Plec PE=1 SV=3 - [PLEC_MOUSE]	135	533.861	1384.72	32.25	0.967507	1.05057	1.04126	0.954012	0.97166	0.987327
4	Q62261	Spectrin beta chain, non-erythrocytic 1 OS=Mus musculus GN=Sptbn1 PE=1 SV=2 - [SPTB2_MOUSE]	117	274.052	5779.84	56.88	0.936107	1.10704	1.08147	0.98087	0.952752	0.96317
5	Q68FD5	Clathrin heavy chain 1 OS=Mus musculus GN=Cltc PE=1 SV=3 - [CLH1_MOUSE]	88	191.435	5571.79	55.7	0.898397	1.11568	1.20536	1.07506	0.916589	0.953959
6	Q9QYR6	Microtubule-associated protein 1A OS=Mus musculus GN=Map1a PE=1 SV=2 - [MAP1A_MOUSE]	72	299.957	2149.85	29.18	1.00031	1.09271	1.05992	0.979942	1.00635	1.02618
7	P20357	Microtubule-associated protein 2 OS=Mus musculus GN=Map2 PE=1 SV=2 - [MTAP2_MOUSE]	63	199.01	2331.69	38.29	1.06903	1.09134	1.04988	1.14575	0.892982	0.953145
8	Q8C8R3	Ankyrin-2 OS=Mus musculus GN=Ank2 PE=1 SV=2 - [ANK2_MOUSE]	63	425.999	1146.08	22.5	0.980334	1.01424	1.03283	0.997154	0.968459	0.966393
9	O88737	Protein bassoon OS=Mus musculus GN=Bsn PE=1 SV=4 - [BSN_MOUSE]	61	418.587	895.026	18.92	0.942081	1.0158	1.11257	1.01849	0.959034	0.972534
10	Q8CAQ8	MICOS complex subunit Mic60 OS=Mus musculus GN=Immt PE=1 SV=1 - [MIC60_MOUSE]	53	83.8482	1222.36	66.05	0.953139	1.06963	1.11766	1.00469	0.947326	0.994258
11	P17710	Hexokinase-1 OS=Mus musculus GN=Hk1 PE=1 SV=3 - [HXK1_MOUSE]	52	108.234	2990.54	54.11	0.962207	1.10045	1.13525	1.08323	0.918296	0.94273
12	P14873	Microtubule-associated protein 1B OS=Mus musculus GN=Map1b PE=1 SV=2 - [MAP1B_MOUSE]	52	270.089	1310.55	25.97	0.996746	1.05386	1.03917	0.958505	1.04274	1.06201
13	P46460	Vesicle-fusing ATPase OS=Mus musculus GN=Nsf PE=1 SV=2 - [NSF_MOUSE]	47	82.561	2731.32	61.42	0.976384	1.09941	1.12021	1.06231	0.972873	0.966453
14	P19096	Fatty acid synthase OS=Mus musculus GN=Fasn PE=1 SV=2 - [FAS_MOUSE]	46	272.257	776.892	20.93	1.08769	0.956075	0.921382	1.0098	0.990501	0.999217
15	Q8CHC4	Synaptojanin-1 OS=Mus musculus GN=Synj1 PE=1 SV=3 - [SYNJ1_MOUSE]	45	172.509	1044.23	33.16	0.96971	1.0723	1.04537	1.02261	0.984903	0.976514
16	Q99104	Unconventional myosin-Va OS=Mus musculus GN=Myo5a PE=1 SV=2 - [MYO5A_MOUSE]	44	215.402	866.578	24.93	0.92535	1.07681	1.06741	0.947191	0.95064	0.958515
17	O08599	Syntaxin-binding protein 1 OS=Mus musculus GN=Stxbp1 PE=1 SV=2 - [STXB1_MOUSE]	41	67.5259	2309.59	59.09	0.895685	1.10627	1.10116	0.93143	0.960294	0.990819
18	Q01853	Transitional endoplasmic reticulum ATPase OS=Mus musculus GN=Vcp PE=1 SV=4 - [TERA_MOUSE]	41	89.2657	1242.32	53.35	1.06668	1.04353	1.00044	0.980773	0.969487	1.02542
19	F6SEU4	Ras/Rap GTPase-activating protein SynGAP OS=Mus musculus GN=Syngap1 PE=1 SV=2 - [SYGP1_MOUSE]	40	148.145	799.947	35.75	0.927875	1.08944	1.11693	1.01165	0.992524	0.951659
20	Q6PIC6	Sodium/potassium-transporting ATPase subunit alpha-3 OS=Mus musculus GN=Atp1a3 PE=1 SV=1 - [AT1A3_MOUSE]	39	111.62	7917.21	57.16	0.912055	1.07421	1.14326	1.00433	0.937146	0.989177
21	Q99KI0	Aconitate hydratase, mitochondrial OS=Mus musculus GN=Aco2 PE=1 SV=1 - [ACON_MOUSE]	39	85.41	3193.52	54.49	1.00384	1.02437	1.06552	0.979374	1.01054	1.00127
22	P39053	Dynamin-1 OS=Mus musculus GN=Dnm1 PE=1 SV=2 - [DYN1_MOUSE]	39	97.7413	2680.85	58.71	1.00177	1.07354	1.10034	1.05296	0.967041	0.994539
23	Q8BPN8	DmX-like protein 2 OS=Mus musculus GN=Dmxl2 PE=1 SV=3 - [DMXL2_MOUSE]	39	337.995	571.329	15.27	0.971665	1.03639	1.03643	1.06979	0.961495	0.955663
24	P08553	Neurofilament medium polypeptide OS=Mus musculus GN=Nefm PE=1 SV=4 - [NFM_MOUSE]	38	95.8586	2368.45	45.87	0.987113	1.04522	0.974606	0.803265	1.27343	1.27575
25	Q61316	Heat shock 70 kDa protein 4 OS=Mus musculus GN=Hspa4 PE=1 SV=1 - [HSP74_MOUSE]	38	94.0733	1665.65	51.61	1.04562	1.00383	0.962747	1.01238	0.97434	0.979635
26	Q61879	Myosin-10 OS=Mus musculus GN=Myh10 PE=1 SV=2 - [MYH10_MOUSE]	38	228.855	824.273	28.9	0.919041	1.05148	1.04651	0.992605	1.01525	0.993561
27	P03995	Glial fibrillary acidic protein OS=Mus musculus GN=Gfap PE=1 SV=4 - [GFAP_MOUSE]	37	49.8695	2002.08	76.74	1.69593	1.06787	0.888942	1.35938	1.0134	1.05975
28	O55143	Sarcoplasmic/endoplasmic reticulum calcium ATPase 2 OS=Mus musculus GN=Atp2a2 PE=1 SV=2 - [AT2A2_MOUSE]	37	114.784	1000.27	35.73	0.899154	1.13206	1.18104	0.975222	0.948567	1.00439
29	Q7TSJ2	Microtubule-associated protein 6 OS=Mus musculus GN=Map6 PE=1 SV=2 - [MAP6_MOUSE]	37	96.3906	891.557	45.14	1.00836	1.04634	1.03976	0.964923	0.986784	1.06282
30	Q03265	ATP synthase subunit alpha, mitochondrial OS=Mus musculus GN=Atp5a1 PE=1 SV=1 - [ATPA_MOUSE]	36	59.7156	6017.48	64.56	0.98565	1.03282	1.05487	1.04639	0.943696	1.00803
31	Q6PIE5	Sodium/potassium-transporting ATPase subunit alpha-2 OS=Mus musculus GN=Atp1a2 PE=1 SV=1 - [AT1A2_MOUSE]	36	112.145	4834.26	52.06	0.919098	1.11967	1.11287	0.948748	0.938948	1.02119
32	P07724	Serum albumin OS=Mus musculus GN=Alb PE=1 SV=3 - [ALBU_MOUSE]	36	68.6477	1856.78	65.3	1.13578	0.880312	0.819852	1.08729	0.953656	1.08005
33	Q02053	Ubiquitin-like modifier-activating enzyme 1 OS=Mus musculus GN=Uba1 PE=1 SV=1 - [UBA1_MOUSE]	36	117.734	1797.8	39.51	1.01191	1.10091	0.977613	0.991702	1.00747	1.01943
34	Q64521	Glycerol-3-phosphate dehydrogenase, mitochondrial OS=Mus musculus GN=Gpd2 PE=1 SV=2 - [GPDM_MOUSE]	36	80.9025	1076.22	56.81	0.979704	1.09053	1.07807	1.08047	0.909336	0.954301
35	P12960	Contactin-1 OS=Mus musculus GN=Cntn1 PE=1 SV=1 - [CNTN1_MOUSE]	36	113.317	1023.89	40.98	0.893912	1.10332	1.12833	0.974562	0.943697	1.00038
36	Q6ZQ38	Cullin-associated NEDD8-dissociated protein 1 OS=Mus musculus GN=Cand1 PE=1 SV=2 - [CAND1_MOUSE]	36	136.245	597.963	32.76	1.00783	1.0201	1.05746	1.0485	0.981256	0.973749
37	P52480	Pyruvate kinase PKM OS=Mus musculus GN=Pkm PE=1 SV=4 - [KPYM_MOUSE]	35	57.808	3481.61	67.23	1.12595	0.969261	0.9396	0.991706	1.01425	1.02965
38	Q8BH59	Calcium-binding mitochondrial carrier protein Aralar1 OS=Mus musculus GN=Slc25a12 PE=1 SV=1 - [CMC1_MOUSE]	34	74.5227	2115.13	61.74	0.929122	1.1094	1.05879	1.00506	0.94078	0.928497
39	P50516	V-type proton ATPase catalytic subunit A OS=Mus musculus GN=Atp6v1a PE=1 SV=2 - [VATA_MOUSE]	34	68.2826	2023.46	51.54	1.00504	1.08385	1.076	1.10995	0.978512	0.957191
40	P63038	60 kDa heat shock protein, mitochondrial OS=Mus musculus GN=Hspd1 PE=1 SV=1 - [CH60_MOUSE]	34	60.9174	1893.91	57.24	1.04148	1.04739	1.01515	1.05959	0.975275	1.0082
41	Q8CI94	Glycogen phosphorylase, brain form OS=Mus musculus GN=Pygb PE=1 SV=3 - [PYGB_MOUSE]	34	96.6685	1338.65	55.75	1.06812	1.12781	1.06343	1.09263	0.981562	1.00924
42	Q3UNH4	G protein-regulated inducer of neurite outgrowth 1 OS=Mus musculus GN=Gprin1 PE=1 SV=2 - [GRIN1_MOUSE]	34	95.4374	296.161	38.09	0.987683	1.039	1.11532	0.95741	0.96981	0.963446
43	Q8BYI9	Tenascin-R OS=Mus musculus GN=Tnr PE=1 SV=2 - [TENR_MOUSE]	33	149.495	1589.65	29.46	0.909594	1.10483	1.12786	0.978277	0.958579	1.0063
44	Q91VD9	NADH-ubiquinone oxidoreductase 75 kDa subunit, mitochondrial OS=Mus musculus GN=Ndufs1 PE=1 SV=2 - [NDUS1_MOUSE]	32	79.7256	1678.26	49.79	0.947576	1.04345	1.13969	1.03667	0.927875	0.970565
45	Q76MZ3	Serine/threonine-protein phosphatase 2A 65 kDa regulatory subunit A alpha isoform OS=Mus musculus GN=Ppp2r1a PE=1 SV=3 - [2AAA_MOUSE]	32	65.2809	1665.13	58.4	0.973704	1.05635	0.989848	1.02609	0.97906	0.992932
46	P16330	2',3'-cyclic-nucleotide 3'-phosphodiesterase OS=Mus musculus GN=Cnp PE=1 SV=3 - [CN37_MOUSE]	32	47.0935	1606.25	59.05	0.907426	1.18951	1.11915	0.744975	1.32639	1.39184
47	Q11011	Puromycin-sensitive aminopeptidase OS=Mus musculus GN=Npepps PE=1 SV=2 - [PSA_MOUSE]	32	103.26	672.149	36.09	1.02526	1.02761	0.968049	1.04389	0.996432	1.00771
48	Q9QXZ0	Microtubule-actin cross-linking factor 1 OS=Mus musculus GN=Macf1 PE=1 SV=2 - [MACF1_MOUSE]	32	831.362	284.818	5.36	0.966926	1.02172	0.938791	1.04435	0.982131	0.918539
49	P46660	Alpha-internexin OS=Mus musculus GN=Ina PE=1 SV=3 - [AINX_MOUSE]	31	55.3493	2701.39	69.46	0.952683	0.989625	0.983804	0.787842	1.24414	1.14579
50	P58281	Dynamin-like 120 kDa protein, mitochondrial OS=Mus musculus GN=Opa1 PE=1 SV=1 - [OPA1_MOUSE]	31	111.27	847.707	37.19	0.938142	1.08224	1.0627	1.01299	0.9622	0.972833
51	Q60597	2-oxoglutarate dehydrogenase, mitochondrial OS=Mus musculus GN=Ogdh PE=1 SV=3 - [ODO1_MOUSE]	31	116.375	666.416	32.84	0.927759	1.05104	1.05945	1.00359	0.957169	0.954259
52	Q9QWI6	SRC kinase signaling inhibitor 1 OS=Mus musculus GN=Srcin1 PE=1 SV=2 - [SRCN1_MOUSE]	31	134.776	555.551	29.52	0.967137	1.0466	1.09744	0.932075	0.97204	0.99695
53	Q91V92	ATP-citrate synthase OS=Mus musculus GN=Acly PE=1 SV=1 - [ACLY_MOUSE]	31	119.651	398.602	33.09	1.03956	0.988072	0.924029	1.08685	0.995744	0.981515
54	P08551	Neurofilament light polypeptide OS=Mus musculus GN=Nefl PE=1 SV=5 - [NFL_MOUSE]	30	61.4711	2260.6	58.56	0.961452	1.04337	1.00559	0.783193	1.21526	1.27135
55	P26443	Glutamate dehydrogenase 1, mitochondrial OS=Mus musculus GN=Glud1 PE=1 SV=1 - [DHE3_MOUSE]	30	61.2982	1688.18	52.51	1.08639	1.09065	0.999445	1.00561	0.980461	0.985197
56	Q810U3	Neurofascin OS=Mus musculus GN=Nfasc PE=1 SV=1 - [NFASC_MOUSE]	30	137.889	853.43	24.76	0.930252	1.03273	1.05816	0.880953	0.990927	1.03498
57	Q9Z1B3	1-phosphatidylinositol 4,5-bisphosphate phosphodiesterase beta-1 OS=Mus musculus GN=Plcb1 PE=1 SV=2 - [PLCB1_MOUSE]	30	138.309	496.028	25.74	0.977533	1.07201	1.00972	0.973577	0.933076	0.983427
58	P06745	Glucose-6-phosphate isomerase OS=Mus musculus GN=Gpi PE=1 SV=4 - [G6PI_MOUSE]	29	62.7272	1258.88	43.01	1.06818	1.04757	1.00002	1.06674	1.00375	0.977321
59	Q9R0K7	Plasma membrane calcium-transporting ATPase 2 OS=Mus musculus GN=Atp2b2 PE=1 SV=2 - [AT2B2_MOUSE]	29	132.503	1021.29	38.23	0.89003	1.20768	1.25912	0.960576	0.884244	1.01559
60	P63318	Protein kinase C gamma type OS=Mus musculus GN=Prkcg PE=1 SV=1 - [KPCG_MOUSE]	29	78.3071	793.762	53.52	0.956721	1.03095	1.04183	1.03066	1.01044	0.923766
61	Q9WV92	Band 4.1-like protein 3 OS=Mus musculus GN=Epb41l3 PE=1 SV=1 - [E41L3_MOUSE]	29	103.274	578.853	37.89	0.992251	1.07609	1.05677	0.927883	1.02158	1.07184
62	Q4KMM3	Oxidation resistance protein 1 OS=Mus musculus GN=Oxr1 PE=1 SV=3 - [OXR1_MOUSE]	29	95.8525	454.94	38.91	0.989721	1.03125	1.08947	0.98945	0.984161	0.988604
63	Q9QYX7	Protein piccolo OS=Mus musculus GN=Pclo PE=1 SV=4 - [PCLO_MOUSE]	29	550.496	192.992	7.1	0.97068	1.01121	1.03564	0.967933	0.978393	0.988107
64	O88935	Synapsin-1 OS=Mus musculus GN=Syn1 PE=1 SV=2 - [SYN1_MOUSE]	28	74.0516	3423.87	56.66	0.994013	1.01612	1.11033	1.01014	1.02533	0.997365
65	P38647	Stress-70 protein, mitochondrial OS=Mus musculus GN=Hspa9 PE=1 SV=3 - [GRP75_MOUSE]	28	73.4156	1974.32	45.21	0.988455	1.04297	1.05366	1.01403	0.947014	1.01013
66	P58252	Elongation factor 2 OS=Mus musculus GN=Eef2 PE=1 SV=2 - [EF2_MOUSE]	28	95.2529	710.753	38.23	1.02973	1.0728	1.03708	1.0403	0.971343	1.02409
67	Q60864	Stress-induced-phosphoprotein 1 OS=Mus musculus GN=Stip1 PE=1 SV=1 - [STIP1_MOUSE]	28	62.5424	532.775	45.3	1.03415	1.03336	0.938884	1.03772	0.977623	1.00256
68	O54991	Contactin-associated protein 1 OS=Mus musculus GN=Cntnap1 PE=1 SV=2 - [CNTP1_MOUSE]	28	156.212	432.537	24.26	0.920554	1.04987	1.04004	0.986532	1.01884	1.0094
69	Q8VDN2	Sodium/potassium-transporting ATPase subunit alpha-1 OS=Mus musculus GN=Atp1a1 PE=1 SV=1 - [AT1A1_MOUSE]	27	112.91	4555.6	46.14	0.860611	1.16596	1.26372	0.901763	0.954359	1.01025
70	O08553	Dihydropyrimidinase-related protein 2 OS=Mus musculus GN=Dpysl2 PE=1 SV=2 - [DPYL2_MOUSE]	27	62.2386	4549.5	78.67	1.05265	1.02228	0.993015	0.998137	1.05686	1.03937
71	P11499	Heat shock protein HSP 90-beta OS=Mus musculus GN=Hsp90ab1 PE=1 SV=3 - [HS90B_MOUSE]	27	83.2291	1929.9	52.62	1.10005	0.975719	0.869257	1.03305	0.982137	1.01398
72	P17426	AP-2 complex subunit alpha-1 OS=Mus musculus GN=Ap2a1 PE=1 SV=1 - [AP2A1_MOUSE]	27	107.596	1808.28	47.59	0.949795	1.11338	1.16692	1.0172	0.937439	0.964246
73	Q9Z0E0	Neurochondrin OS=Mus musculus GN=Ncdn PE=1 SV=1 - [NCDN_MOUSE]	27	78.8447	1438.79	41.56	0.987793	1.02742	0.961659	1.05756	0.97259	1.00102
74	Q9Z1G4	V-type proton ATPase 116 kDa subunit a isoform 1 OS=Mus musculus GN=Atp6v0a1 PE=1 SV=3 - [VPP1_MOUSE]	27	96.4042	1278.37	31.82	0.931596	1.08994	1.11208	1.02382	0.940952	0.940931
75	P20029	78 kDa glucose-regulated protein OS=Mus musculus GN=Hspa5 PE=1 SV=3 - [GRP78_MOUSE]	27	72.3775	1152.6	46.41	1.03221	1.01083	0.948474	1.03463	0.996445	1.02391
76	P13595	Neural cell adhesion molecule 1 OS=Mus musculus GN=Ncam1 PE=1 SV=3 - [NCAM1_MOUSE]	27	119.353	918.321	27.8	0.939246	1.07886	1.05391	0.947479	0.938421	1.00116
77	P27773	Protein disulfide-isomerase A3 OS=Mus musculus GN=Pdia3 PE=1 SV=2 - [PDIA3_MOUSE]	27	56.6427	587.169	51.49	1.05087	1.01811	1.06696	1.02847	1.00069	1.05225
78	Q920I9	WD repeat-containing protein 7 OS=Mus musculus GN=Wdr7 PE=1 SV=3 - [WDR7_MOUSE]	27	163.345	529.363	19.68	1.03145	0.99761	0.986718	1.05226	0.960155	0.943697
79	O08788	Dynactin subunit 1 OS=Mus musculus GN=Dctn1 PE=1 SV=3 - [DCTN1_MOUSE]	27	141.588	528.771	26.39	0.992714	1.03015	1.00259	0.974597	0.996945	0.99765
80	P23819	Glutamate receptor 2 OS=Mus musculus GN=Gria2 PE=1 SV=3 - [GRIA2_MOUSE]	27	98.5991	441.309	40.77	0.926303	1.10465	1.20151	1.0911	0.945298	0.880378
81	Q91ZX7	Prolow-density lipoprotein receptor-related protein 1 OS=Mus musculus GN=Lrp1 PE=1 SV=1 - [LRP1_MOUSE]	27	504.411	303.316	6.49	1.00992	1.01653	1.03932	1.00554	0.998202	0.99133
82	P05064	Fructose-bisphosphate aldolase A OS=Mus musculus GN=Aldoa PE=1 SV=2 - [ALDOA_MOUSE]	26	39.3313	4055.34	76.1	1.0972	0.992267	1.01268	1.05301	1.04539	1.03157
83	P63017	Heat shock cognate 71 kDa protein OS=Mus musculus GN=Hspa8 PE=1 SV=1 - [HSP7C_MOUSE]	26	70.8272	3976.34	61.61	1.04901	1.05861	0.999251	1.01794	0.964798	1.01962
84	P62814	V-type proton ATPase subunit B, brain isoform OS=Mus musculus GN=Atp6v1b2 PE=1 SV=1 - [VATB2_MOUSE]	26	56.5149	2284.58	57.14	1.01361	1.03069	1.0417	1.04199	0.988156	0.985563
85	P09411	Phosphoglycerate kinase 1 OS=Mus musculus GN=Pgk1 PE=1 SV=4 - [PGK1_MOUSE]	26	44.522	1551.03	68.59	1.05926	1.07467	1.03487	1.00713	1.0359	1.03756
86	P17427	AP-2 complex subunit alpha-2 OS=Mus musculus GN=Ap2a2 PE=1 SV=2 - [AP2A2_MOUSE]	26	103.951	1489.79	46.16	0.949656	1.07502	1.05092	1.04954	0.948106	0.921752
87	Q8K0U4	Heat shock 70 kDa protein 12A OS=Mus musculus GN=Hspa12a PE=1 SV=1 - [HS12A_MOUSE]	26	74.8245	1185.06	40.3	0.939877	1.10252	1.06957	0.973414	1.00393	0.935351
88	P19246	Neurofilament heavy polypeptide OS=Mus musculus GN=Nefh PE=1 SV=3 - [NFH_MOUSE]	26	116.924	1075.96	25.87	1.00263	1.0339	1.01297	0.836479	1.13045	1.13218
89	P48722	Heat shock 70 kDa protein 4L OS=Mus musculus GN=Hspa4l PE=1 SV=2 - [HS74L_MOUSE]	26	94.3225	651.914	40.93	1.02219	1.03162	0.997142	1.02171	0.968353	1.00235
90	Q05920	Pyruvate carboxylase, mitochondrial OS=Mus musculus GN=Pc PE=1 SV=1 - [PYC_MOUSE]	26	129.602	559.784	25.89	0.958861	1.02732	1.03071	0.986401	0.970955	1.02778
91	Q80TJ1	Calcium-dependent secretion activator 1 OS=Mus musculus GN=Cadps PE=1 SV=3 - [CAPS1_MOUSE]	26	153.016	515.103	26.64	0.958304	1.04462	1.06569	1.01517	1.00007	0.964223
92	P28660	Nck-associated protein 1 OS=Mus musculus GN=Nckap1 PE=1 SV=2 - [NCKP1_MOUSE]	26	128.7	447.879	23.14	0.915939	1.10474	1.06734	1.0512	0.979861	0.941794
93	Q71LX4	Talin-2 OS=Mus musculus GN=Tln2 PE=1 SV=3 - [TLN2_MOUSE]	26	253.462	415.023	16.8	0.990458	0.995702	0.963825	1.00879	0.982052	0.955292
94	Q6ZPE2	Myotubularin-related protein 5 OS=Mus musculus GN=Sbf1 PE=1 SV=2 - [MTMR5_MOUSE]	26	208.561	269.671	16.93	0.976865	0.972484	1.01068	0.95902	1.00065	1.01803
95	P56480	ATP synthase subunit beta, mitochondrial OS=Mus musculus GN=Atp5b PE=1 SV=2 - [ATPB_MOUSE]	25	56.2655	6910.46	55.77	0.973687	1.00624	1.03899	1.0721	0.984166	1.00498
96	Q9DBG3	AP-2 complex subunit beta OS=Mus musculus GN=Ap2b1 PE=1 SV=1 - [AP2B1_MOUSE]	25	104.516	1583.24	46.21	0.997558	1.09942	1.13377	1.04533	0.948481	0.917573
97	P05201	Aspartate aminotransferase, cytoplasmic OS=Mus musculus GN=Got1 PE=1 SV=3 - [AATC_MOUSE]	25	46.2185	1286.03	67.55	1.02552	1.03352	0.994433	1.06116	1.03782	1.00348
98	P05202	Aspartate aminotransferase, mitochondrial OS=Mus musculus GN=Got2 PE=1 SV=1 - [AATM_MOUSE]	25	47.3812	1263.43	50.7	1.01601	1.03949	1.06901	1.12524	0.957865	0.987395
99	Q61644	Protein kinase C and casein kinase substrate in neurons protein 1 OS=Mus musculus GN=Pacsin1 PE=1 SV=1 - [PACN1_MOUSE]	25	50.5435	981.228	55.78	1.03601	1.02348	1.04767	0.965777	1.01101	1.00785
100	Q61699	Heat shock protein 105 kDa OS=Mus musculus GN=Hsph1 PE=1 SV=2 - [HS105_MOUSE]	25	96.3464	903.676	36.01	1.05491	1.02037	0.947869	1.03732	0.979418	1.05266
101	P55066	Neurocan core protein OS=Mus musculus GN=Ncan PE=1 SV=1 - [NCAN_MOUSE]	25	137.114	782.4	19.64	1.01465	0.992083	1.01272	1.05245	0.985925	0.993014
102	P42932	T-complex protein 1 subunit theta OS=Mus musculus GN=Cct8 PE=1 SV=3 - [TCPQ_MOUSE]	25	59.5175	542.893	45.99	0.97942	1.03989	0.988559	1.07303	0.940925	0.954279
103	Q9CZW5	Mitochondrial import receptor subunit TOM70 OS=Mus musculus GN=Tomm70 PE=1 SV=2 - [TOM70_MOUSE]	25	67.5469	506.761	39.12	0.96363	1.00135	0.993797	0.970304	0.953047	0.980047
104	Q3UHJ0	AP2-associated protein kinase 1 OS=Mus musculus GN=Aak1 PE=1 SV=2 - [AAK1_MOUSE]	25	103.282	491.017	30.97	0.957742	1.06978	1.10863	0.995417	0.979161	0.998603
105	P15508	Spectrin beta chain, erythrocytic OS=Mus musculus GN=Sptb PE=1 SV=4 - [SPTB1_MOUSE]	25	245.098	439.473	16.59	0.941508	0.969009	0.960749	0.978421	1.04856	0.975429
106	P08113	Endoplasmin OS=Mus musculus GN=Hsp90b1 PE=1 SV=2 - [ENPL_MOUSE]	25	92.4183	345.15	31.8	1.02007	1.05237	0.989452	1.02525	1.0108	1.05538
107	P15105	Glutamine synthetase OS=Mus musculus GN=Glul PE=1 SV=6 - [GLNA_MOUSE]	24	42.0923	1616.05	54.42	1.10155	1.03928	1.10321	1.00563	0.970219	1.00168
108	Q7TPR4	Alpha-actinin-1 OS=Mus musculus GN=Actn1 PE=1 SV=1 - [ACTN1_MOUSE]	24	103.004	1403	52.91	0.983034	1.0519	1.07245	0.976244	0.930924	0.950707
109	P97807	Fumarate hydratase, mitochondrial OS=Mus musculus GN=Fh PE=1 SV=3 - [FUMH_MOUSE]	24	54.3221	951.366	56.21	1.02825	1.01105	1.015	1.01342	0.945914	0.97403
110	Q8K1M6	Dynamin-1-like protein OS=Mus musculus GN=Dnm1l PE=1 SV=2 - [DNM1L_MOUSE]	24	82.6065	920.348	39.22	1.06291	0.975636	0.985359	1.07744	0.961844	0.970842
111	Q8VEK3	Heterogeneous nuclear ribonucleoprotein U OS=Mus musculus GN=Hnrnpu PE=1 SV=1 - [HNRPU_MOUSE]	24	87.8627	434.169	27.25	0.961899	1.00712	1.10527	0.945501	0.960812	1.03064
112	P14824	Annexin A6 OS=Mus musculus GN=Anxa6 PE=1 SV=3 - [ANXA6_MOUSE]	24	75.8374	428.55	35.36	0.984124	1.06556	0.987135	0.995059	0.995359	0.971067
113	Q8R0Y6	Cytosolic 10-formyltetrahydrofolate dehydrogenase OS=Mus musculus GN=Aldh1l1 PE=1 SV=1 - [AL1L1_MOUSE]	24	98.6465	354.057	30.6	1.06227	1.06889	1.02638	0.97449	1.01985	0.997709
114	Q9JME5	AP-3 complex subunit beta-2 OS=Mus musculus GN=Ap3b2 PE=1 SV=2 - [AP3B2_MOUSE]	24	119.118	338.774	26.52	1.00276	1.04521	1.02648	1.01813	0.949581	0.971919
115	P70704	Phospholipid-transporting ATPase IA OS=Mus musculus GN=Atp8a1 PE=1 SV=2 - [AT8A1_MOUSE]	24	131.33	279.684	22.68	0.916991	1.02515	0.955267	1.00955	0.963912	0.979011
116	P07901	Heat shock protein HSP 90-alpha OS=Mus musculus GN=Hsp90aa1 PE=1 SV=4 - [HS90A_MOUSE]	23	84.7348	2027.39	48.29	1.04803	1.02851	0.954814	1.05122	0.953891	1.01738
117	Q8K2B3	Succinate dehydrogenase [ubiquinone] flavoprotein subunit, mitochondrial OS=Mus musculus GN=Sdha PE=1 SV=1 - [SDHA_MOUSE]	23	72.5392	786.834	43.67	0.960117	0.977499	1.14631	1.00634	0.949869	1.00796
118	Q8BMS1	Trifunctional enzyme subunit alpha, mitochondrial OS=Mus musculus GN=Hadha PE=1 SV=1 - [ECHA_MOUSE]	23	82.6175	659.192	32.63	1.03633	1.04352	1.07768	0.945591	1.02495	1.02373
119	O88342	WD repeat-containing protein 1 OS=Mus musculus GN=Wdr1 PE=1 SV=3 - [WDR1_MOUSE]	23	66.365	613.638	45.21	1.1607	0.961969	0.931516	1.05391	1.03126	1.00578
120	Q8BKX1	Brain-specific angiogenesis inhibitor 1-associated protein 2 OS=Mus musculus GN=Baiap2 PE=1 SV=2 - [BAIP2_MOUSE]	23	59.1999	549.557	42.62	0.991702	0.959612	0.997695	1.02789	0.961488	0.975196
121	P80314	T-complex protein 1 subunit beta OS=Mus musculus GN=Cct2 PE=1 SV=4 - [TCPB_MOUSE]	23	57.4411	474.723	47.1	1.03968	1.0601	0.96318	0.993013	1.0178	1.02554
122	Q921I1	Serotransferrin OS=Mus musculus GN=Tf PE=1 SV=1 - [TRFE_MOUSE]	23	76.6737	451.433	40.46	1.03657	1.0122	1.02645	0.902862	1.04847	1.06933
123	P70336	Rho-associated protein kinase 2 OS=Mus musculus GN=Rock2 PE=1 SV=1 - [ROCK2_MOUSE]	23	160.485	203.627	18.37	1.00859	1.02185	0.9646	0.959446	1.00898	0.98781
124	P17182	Alpha-enolase OS=Mus musculus GN=Eno1 PE=1 SV=3 - [ENOA_MOUSE]	22	47.1112	4999.3	72.81	1.16616	1.01222	0.954671	1.076	1.03546	1.01494
125	P05063	Fructose-bisphosphate aldolase C OS=Mus musculus GN=Aldoc PE=1 SV=4 - [ALDOC_MOUSE]	22	39.3702	2312.62	64.19	1.11983	1.04415	1.0784	1.01054	0.940296	1.01517
126	P60879	Synaptosomal-associated protein 25 OS=Mus musculus GN=Snap25 PE=1 SV=1 - [SNP25_MOUSE]	22	23.3002	1690.93	83.5	0.976489	1.10921	1.15732	0.983305	0.96934	1.02611
127	Q9DB77	Cytochrome b-c1 complex subunit 2, mitochondrial OS=Mus musculus GN=Uqcrc2 PE=1 SV=1 - [QCR2_MOUSE]	22	48.205	1318.92	52.76	0.979298	1.06429	1.11343	1.13398	0.951473	0.967444
128	Q9WUA3	ATP-dependent 6-phosphofructokinase, platelet type OS=Mus musculus GN=Pfkp PE=1 SV=1 - [PFKAP_MOUSE]	22	85.4003	1056.15	37.12	0.983993	1.09135	1.06624	0.950926	0.978465	1.02406
129	P84091	AP-2 complex subunit mu OS=Mus musculus GN=Ap2m1 PE=1 SV=1 - [AP2M1_MOUSE]	22	49.623	1000.17	51.26	0.976498	1.053	1.08059	1.02899	0.944555	0.942849
130	Q62108	Disks large homolog 4 OS=Mus musculus GN=Dlg4 PE=1 SV=1 - [DLG4_MOUSE]	22	80.4228	778.445	36.6	0.935922	1.1675	1.14276	1.06465	0.961109	0.95494
131	P80318	T-complex protein 1 subunit gamma OS=Mus musculus GN=Cct3 PE=1 SV=1 - [TCPG_MOUSE]	22	60.5914	653.993	41.47	0.979633	1.05835	0.983228	1.0201	0.991525	0.996487
132	Q6PB66	Leucine-rich PPR motif-containing protein, mitochondrial OS=Mus musculus GN=Lrpprc PE=1 SV=2 - [LPPRC_MOUSE]	22	156.516	383.256	18.82	0.976792	1.01967	0.984514	1.03557	1.04047	1.01466
133	P08249	Malate dehydrogenase, mitochondrial OS=Mus musculus GN=Mdh2 PE=1 SV=3 - [MDHM_MOUSE]	21	35.5888	4650.64	69.82	1.01012	1.0186	1.03206	1.00182	0.979828	1.02759
134	P47857	ATP-dependent 6-phosphofructokinase, muscle type OS=Mus musculus GN=Pfkm PE=1 SV=3 - [PFKAM_MOUSE]	21	85.2146	1050.29	38.97	0.971013	1.14985	1.06554	0.984097	0.968117	1.01867
135	P35486	Pyruvate dehydrogenase E1 component subunit alpha, somatic form, mitochondrial OS=Mus musculus GN=Pdha1 PE=1 SV=1 - [ODPA_MOUSE]	21	43.2036	1009.25	50.26	0.968346	0.968623	1.06701	0.95147	0.98497	1.00797
136	Q9D6R2	Isocitrate dehydrogenase [NAD] subunit alpha, mitochondrial OS=Mus musculus GN=Idh3a PE=1 SV=1 - [IDH3A_MOUSE]	21	39.6131	966.616	48.91	1.0092	1.02311	1.05001	1.05205	0.95004	0.983888
137	P61922	4-aminobutyrate aminotransferase, mitochondrial OS=Mus musculus GN=Abat PE=1 SV=1 - [GABT_MOUSE]	21	56.4156	849.475	54.2	0.955721	1.06478	0.967969	1.0333	0.964501	1.0295
138	Q9Z1G3	V-type proton ATPase subunit C 1 OS=Mus musculus GN=Atp6v1c1 PE=1 SV=4 - [VATC1_MOUSE]	21	43.8599	775.764	50.52	0.958774	1.0667	1.08806	1.06077	0.92905	0.985964
139	Q9QYC0	Alpha-adducin OS=Mus musculus GN=Add1 PE=1 SV=2 - [ADDA_MOUSE]	21	80.5963	740.196	33.33	0.973919	1.11501	1.06665	1.03365	0.954438	1.00518
140	Q9EQH3	Vacuolar protein sorting-associated protein 35 OS=Mus musculus GN=Vps35 PE=1 SV=1 - [VPS35_MOUSE]	21	91.6548	541.281	29.4	0.988746	1.10304	1.05616	1.08044	0.928889	0.988869
141	O08539	Myc box-dependent-interacting protein 1 OS=Mus musculus GN=Bin1 PE=1 SV=1 - [BIN1_MOUSE]	21	64.4302	539.335	44.73	1.04733	1.0756	1.05593	0.964527	1.05355	1.06915
142	P40142	Transketolase OS=Mus musculus GN=Tkt PE=1 SV=1 - [TKT_MOUSE]	21	67.5876	501.931	37.88	1.02287	1.15028	1.02516	0.991954	1.01009	1.06936
143	Q8VDD5	Myosin-9 OS=Mus musculus GN=Myh9 PE=1 SV=4 - [MYH9_MOUSE]	21	226.232	487.582	19.44	0.945975	1.04099	1.05273	1.00428	0.978816	1.00861
144	P09103	Protein disulfide-isomerase OS=Mus musculus GN=P4hb PE=1 SV=2 - [PDIA1_MOUSE]	21	57.0228	280.983	37.92	1.0402	1.03445	1.01666	0.993472	0.981019	1.05567
145	E9Q401	Ryanodine receptor 2 OS=Mus musculus GN=Ryr2 PE=1 SV=1 - [RYR2_MOUSE]	21	564.458	257.354	4.63	0.970886	0.969398	1.05179	0.886381	1.18095	1.09521
146	P60469	Liprin-alpha-3 OS=Mus musculus GN=Ppfia3 PE=1 SV=2 - [LIPA3_MOUSE]	21	133.344	232.918	22.28	0.962805	1.01929	1.0121	1.00165	0.987972	0.973201
147	P16858	Glyceraldehyde-3-phosphate dehydrogenase OS=Mus musculus GN=Gapdh PE=1 SV=2 - [G3P_MOUSE]	20	35.7872	6674.14	64.56	1.08819	1.02212	0.971723	0.973814	1.00647	1.04117
148	P62259	14-3-3 protein epsilon OS=Mus musculus GN=Ywhae PE=1 SV=1 - [1433E_MOUSE]	20	29.1554	1620.31	75.29	1.05489	1.06604	1.01744	1.08735	0.970244	0.990167
149	O55131	Septin-7 OS=Mus musculus GN=Sept7 PE=1 SV=1 - [SEPT7_MOUSE]	20	50.5179	965.776	48.17	1.0467	0.965367	1.05035	0.987327	0.973295	0.990804
150	P20152	Vimentin OS=Mus musculus GN=Vim PE=1 SV=3 - [VIME_MOUSE]	20	53.6551	878.501	58.58	1.31252	0.961719	0.911211	1.09118	1.05317	1.17696
151	Q91V14	Solute carrier family 12 member 5 OS=Mus musculus GN=Slc12a5 PE=1 SV=2 - [S12A5_MOUSE]	20	126.189	729.385	20.56	0.870678	1.21056	1.20998	0.959569	0.870423	0.972098
152	Q8BFR5	Elongation factor Tu, mitochondrial OS=Mus musculus GN=Tufm PE=1 SV=1 - [EFTU_MOUSE]	20	49.477	716.482	48.23	1.01846	1.06464	1.06456	0.993463	0.961908	1.02575
153	O35129	Prohibitin-2 OS=Mus musculus GN=Phb2 PE=1 SV=1 - [PHB2_MOUSE]	20	33.2759	663.021	66.89	0.952241	1.00961	1.06475	1.03184	0.961705	0.971199
154	Q9WUB3	Glycogen phosphorylase, muscle form OS=Mus musculus GN=Pygm PE=1 SV=3 - [PYGM_MOUSE]	20	97.2247	626.557	39.79	1.04145	1.07057	1.0269	0.950266	1.00549	1.01873
155	Q61301	Catenin alpha-2 OS=Mus musculus GN=Ctnna2 PE=1 SV=3 - [CTNA2_MOUSE]	20	105.22	586.213	35.05	0.987894	1.00519	1.06438	1.00304	0.960105	0.950298
156	P11983	T-complex protein 1 subunit alpha OS=Mus musculus GN=Tcp1 PE=1 SV=3 - [TCPA_MOUSE]	20	60.4107	549.915	41.01	0.971392	1.06498	1.02159	1.10708	1.01358	0.998657
157	P21619	Lamin-B2 OS=Mus musculus GN=Lmnb2 PE=1 SV=2 - [LMNB2_MOUSE]	20	67.2773	364.97	38.76	0.947526	1.00805	1.03508	0.938054	1.01254	1.06268
158	Q8BGQ7	Alanine--tRNA ligase, cytoplasmic OS=Mus musculus GN=Aars PE=1 SV=1 - [SYAC_MOUSE]	20	106.841	350.302	21.38	1.01653	1.05572	1.03051	0.991922	1.01528	1.01099
159	P09405	Nucleolin OS=Mus musculus GN=Ncl PE=1 SV=2 - [NUCL_MOUSE]	20	76.6768	315.853	26.31	1.00461	1.05385	1.04148	0.952176	0.92695	1.05348
160	O08532	Voltage-dependent calcium channel subunit alpha-2/delta-1 OS=Mus musculus GN=Cacna2d1 PE=1 SV=1 - [CA2D1_MOUSE]	20	124.551	276.062	21.49	0.887556	1.15031	1.12675	0.918897	0.999422	1.03364
161	Q4ACU6	SH3 and multiple ankyrin repeat domains protein 3 OS=Mus musculus GN=Shank3 PE=1 SV=3 - [SHAN3_MOUSE]	20	185.284	267.305	15.14	0.968436	0.949008	0.943344	0.986428	1.04306	1.04971
162	Q60634	Flotillin-2 OS=Mus musculus GN=Flot2 PE=1 SV=2 - [FLOT2_MOUSE]	20	47.0086	260.154	48.36	0.977922	1.05023	1.03758	0.986275	0.973303	0.942982
163	Q9QVP9	Protein-tyrosine kinase 2-beta OS=Mus musculus GN=Ptk2b PE=1 SV=2 - [FAK2_MOUSE]	20	115.72	251.91	22.79	0.961625	0.997301	0.976802	1.04807	0.97702	0.976181
164	E9Q3L2	Phosphatidylinositol 4-kinase alpha OS=Mus musculus GN=Pi4ka PE=1 SV=2 - [PI4KA_MOUSE]	20	236.889	251.72	10.45	0.951395	1.0239	1.05631	1.01368	0.942087	0.974757
165	Q8BHN3	Neutral alpha-glucosidase AB OS=Mus musculus GN=Ganab PE=1 SV=1 - [GANAB_MOUSE]	20	106.844	212.567	21.61	0.993491	1.01167	1.03512	1.00081	1.06245	0.963776
166	Q80TE7	Leucine-rich repeat-containing protein 7 OS=Mus musculus GN=Lrrc7 PE=1 SV=2 - [LRRC7_MOUSE]	20	166.796	139.708	16.11	0.925545	0.99746	0.989476	0.989222	1.00084	0.962511
167	Q64514	Tripeptidyl-peptidase 2 OS=Mus musculus GN=Tpp2 PE=1 SV=3 - [TPP2_MOUSE]	20	139.791	134.264	16.56	0.91549	1.10826	1.10681	1.00996	1.01118	1.01148
168	P11881	Inositol 1,4,5-trisphosphate receptor type 1 OS=Mus musculus GN=Itpr1 PE=1 SV=2 - [ITPR1_MOUSE]	20	312.968	99.0898	7.93	0.948698	0.982974	0.982963	1.03827	0.929181	0.928356
169	Q04447	Creatine kinase B-type OS=Mus musculus GN=Ckb PE=1 SV=1 - [KCRB_MOUSE]	19	42.6863	3597.15	66.14	1.02731	0.966737	0.9433	0.969635	1.06617	1.07022
170	Q91XV3	Brain acid soluble protein 1 OS=Mus musculus GN=Basp1 PE=1 SV=3 - [BASP1_MOUSE]	19	22.0736	1347.46	77.88	0.977719	1.14847	1.10619	0.928863	1.00579	1.01684
171	G5E829	Plasma membrane calcium-transporting ATPase 1 OS=Mus musculus GN=Atp2b1 PE=1 SV=1 - [AT2B1_MOUSE]	19	134.662	1201	32.87	0.930157	1.15946	1.15711	1.05257	0.965216	0.928605
172	D3Z7P3	Glutaminase kidney isoform, mitochondrial OS=Mus musculus GN=Gls PE=1 SV=1 - [GLSK_MOUSE]	19	73.9162	974.788	32.79	0.960264	1.02001	1.18305	1.1089	0.938057	0.987274
173	Q9Z2Q6	Septin-5 OS=Mus musculus GN=Sept5 PE=1 SV=2 - [SEPT5_MOUSE]	19	42.7207	789.927	47.97	1.03054	1.00093	1.13146	0.889324	0.982333	0.9917
174	Q99KJ8	Dynactin subunit 2 OS=Mus musculus GN=Dctn2 PE=1 SV=3 - [DCTN2_MOUSE]	19	44.0897	745.203	50.75	1.04434	0.993597	1.01674	0.993085	1.00488	1.04091
175	Q91YT0	NADH dehydrogenase [ubiquinone] flavoprotein 1, mitochondrial OS=Mus musculus GN=Ndufv1 PE=1 SV=1 - [NDUV1_MOUSE]	19	50.8017	730.807	48.92	0.972052	0.956974	1.16919	0.985281	0.948587	0.986834
176	Q02248	Catenin beta-1 OS=Mus musculus GN=Ctnnb1 PE=1 SV=1 - [CTNB1_MOUSE]	19	85.4162	552.334	34.96	0.931543	1.06068	1.06015	1.00751	0.959449	0.950274
177	Q7TQF7	Amphiphysin OS=Mus musculus GN=Amph PE=1 SV=1 - [AMPH_MOUSE]	19	74.9672	523.524	29.45	1.01749	1.03689	1.09573	0.999511	0.973508	1.0272
178	P08226	Apolipoprotein E OS=Mus musculus GN=Apoe PE=1 SV=2 - [APOE_MOUSE]	19	35.8444	481.135	53.7	1.63783	1.18973	1.02903	1.54714	0.953149	0.920004
179	Q9DC69	NADH dehydrogenase [ubiquinone] 1 alpha subcomplex subunit 9, mitochondrial OS=Mus musculus GN=Ndufa9 PE=1 SV=2 - [NDUA9_MOUSE]	19	42.4984	463.035	48.54	0.938541	1.01963	1.13149	1.00004	0.968411	0.983487
180	Q8BWF0	Succinate-semialdehyde dehydrogenase, mitochondrial OS=Mus musculus GN=Aldh5a1 PE=1 SV=1 - [SSDH_MOUSE]	19	55.9328	434.582	38.62	0.995167	1.0122	1.06129	1.00078	0.956133	1.02146
181	P48678	Prelamin-A/C OS=Mus musculus GN=Lmna PE=1 SV=2 - [LMNA_MOUSE]	19	74.1927	423.111	31.88	0.952584	1.03433	1.09991	0.915089	0.986525	1.09811
182	Q9QYB8	Beta-adducin OS=Mus musculus GN=Add2 PE=1 SV=4 - [ADDB_MOUSE]	19	80.5913	402.85	29.93	0.989445	1.01471	1.03353	1.03037	0.965529	0.977574
183	G5E8K5	Ankyrin-3 OS=Mus musculus GN=Ank3 PE=1 SV=1 - [ANK3_MOUSE]	19	213.929	400.488	16.78	0.964364	0.982959	1.01283	0.994439	1.05978	1.0028
184	Q6P9K8	Caskin-1 OS=Mus musculus GN=Caskin1 PE=1 SV=2 - [CSKI1_MOUSE]	19	150.403	327.054	16.49	0.971015	1.01094	1.00961	0.997012	1.00889	0.972857
185	Q9D0F9	Phosphoglucomutase-1 OS=Mus musculus GN=Pgm1 PE=1 SV=4 - [PGM1_MOUSE]	19	61.3796	320.461	32.92	1.04491	1.03963	0.952067	1.05809	0.980235	1.01705
186	Q9D0E1	Heterogeneous nuclear ribonucleoprotein M OS=Mus musculus GN=Hnrnpm PE=1 SV=3 - [HNRPM_MOUSE]	19	77.5974	309.557	29.49	0.991347	1.02999	1.0686	0.937457	0.974603	1.01452
187	Q9QXS6	Drebrin OS=Mus musculus GN=Dbn1 PE=1 SV=4 - [DREB_MOUSE]	19	77.2392	291.93	26.06	1.0135	1.04147	1.02704	1.0298	0.981403	0.929899
188	Q60932	Voltage-dependent anion-selective channel protein 1 OS=Mus musculus GN=Vdac1 PE=1 SV=3 - [VDAC1_MOUSE]	18	32.3314	3540.29	80.74	1.01122	0.991271	0.995836	1.00428	0.974732	0.96512
189	P11798	Calcium/calmodulin-dependent protein kinase type II subunit alpha OS=Mus musculus GN=Camk2a PE=1 SV=2 - [KCC2A_MOUSE]	18	54.0805	2783.51	53.77	0.970125	1.03262	1.16103	1.0794	0.98187	0.921144
190	P43006	Excitatory amino acid transporter 2 OS=Mus musculus GN=Slc1a2 PE=1 SV=1 - [EAA2_MOUSE]	18	61.9896	1667.88	25.87	0.933138	1.20654	1.24778	1.06501	0.839695	0.945493
191	Q8BMF4	Dihydrolipoyllysine-residue acetyltransferase component of pyruvate dehydrogenase complex, mitochondrial OS=Mus musculus GN=Dlat PE=1 SV=2 - [ODP2_MOUSE]	18	67.8987	1051.78	35.67	1.00141	0.956543	0.985642	0.952044	0.918118	1.01675
192	P14152	Malate dehydrogenase, cytoplasmic OS=Mus musculus GN=Mdh1 PE=1 SV=3 - [MDHC_MOUSE]	18	36.4881	1015.47	44.91	1.06399	0.999361	0.971617	0.954733	1.0173	1.06935
193	P30275	Creatine kinase U-type, mitochondrial OS=Mus musculus GN=Ckmt1 PE=1 SV=1 - [KCRU_MOUSE]	18	46.9742	915.085	43.54	1.00411	0.951645	1.12935	1.06313	0.969491	1.02198
194	P10852	4F2 cell-surface antigen heavy chain OS=Mus musculus GN=Slc3a2 PE=1 SV=1 - [4F2_MOUSE]	18	58.3003	556.957	31.75	0.95362	1.07887	1.07777	0.946508	0.921616	0.935122
195	P61979	Heterogeneous nuclear ribonucleoprotein K OS=Mus musculus GN=Hnrnpk PE=1 SV=1 - [HNRPK_MOUSE]	18	50.9444	527.6	46	0.992334	1.0315	1.08313	0.991752	0.933928	1.04625
196	Q60625	Intercellular adhesion molecule 5 OS=Mus musculus GN=Icam5 PE=1 SV=2 - [ICAM5_MOUSE]	18	96.8846	452.847	20.07	0.96207	1.02198	1.00908	1.03646	0.988904	0.943294
197	Q8K310	Matrin-3 OS=Mus musculus GN=Matr3 PE=1 SV=1 - [MATR3_MOUSE]	18	94.5718	428.635	23.64	0.980571	1.03093	1.07102	0.921719	0.990665	1.03607
198	Q9Z2I9	Succinate--CoA ligase [ADP-forming] subunit beta, mitochondrial OS=Mus musculus GN=Sucla2 PE=1 SV=2 - [SUCB1_MOUSE]	18	50.0821	423.1	36.93	1.01717	1.02257	1.01507	1.03768	0.952068	1.01065
199	Q922S4	cGMP-dependent 3',5'-cyclic phosphodiesterase OS=Mus musculus GN=Pde2a PE=1 SV=3 - [PDE2A_MOUSE]	18	103.183	345.867	21.29	1.01783	0.96824	0.864534	1.02177	0.946077	0.959475
200	Q6PH08	ERC protein 2 OS=Mus musculus GN=Erc2 PE=1 SV=2 - [ERC2_MOUSE]	18	110.571	317.187	28.42	0.939405	1.04244	1.06927	1.01551	0.986465	0.923752
201	Q64727	Vinculin OS=Mus musculus GN=Vcl PE=1 SV=4 - [VINC_MOUSE]	18	116.644	282.701	19.42	1.01001	0.945299	0.969849	0.997193	0.972649	1.01426
202	P54071	Isocitrate dehydrogenase [NADP], mitochondrial OS=Mus musculus GN=Idh2 PE=1 SV=3 - [IDHP_MOUSE]	18	50.8739	280.293	40.71	1.10609	1.02411	1.06507	0.965048	0.967437	1.04739
203	Q9Z2H5	Band 4.1-like protein 1 OS=Mus musculus GN=Epb41l1 PE=1 SV=2 - [E41L1_MOUSE]	18	98.254	277.081	26.62	0.999911	1.00974	1.02469	1.01835	0.947205	0.950175
204	Q2PFD7	PH and SEC7 domain-containing protein 3 OS=Mus musculus GN=Psd3 PE=1 SV=2 - [PSD3_MOUSE]	18	114.651	261.251	15.43	1.0477	0.992002	1.15539	0.992164	0.96341	0.989129
205	Q3UHD9	Arf-GAP with GTPase, ANK repeat and PH domain-containing protein 2 OS=Mus musculus GN=Agap2 PE=1 SV=1 - [AGAP2_MOUSE]	18	124.434	257.438	19.31	0.963217	0.927775	1.03006	1.02225	1.03822	0.969116
206	O08917	Flotillin-1 OS=Mus musculus GN=Flot1 PE=1 SV=1 - [FLOT1_MOUSE]	18	47.4836	235.41	47.43	0.960209	1.03275	0.996677	1.04377	0.957105	0.899208
207	Q91ZA3	Propionyl-CoA carboxylase alpha chain, mitochondrial OS=Mus musculus GN=Pcca PE=1 SV=2 - [PCCA_MOUSE]	18	79.8711	180.3	28.31	0.944026	1.04657	1.00783	1.00363	1.02281	1.01789
208	P50396	Rab GDP dissociation inhibitor alpha OS=Mus musculus GN=Gdi1 PE=1 SV=3 - [GDIA_MOUSE]	17	50.4891	1513.46	52.13	0.96708	1.2062	1.01139	1.03538	0.94487	1.01735
209	P57780	Alpha-actinin-4 OS=Mus musculus GN=Actn4 PE=1 SV=1 - [ACTN4_MOUSE]	17	104.911	1156.72	42	0.962454	1.02817	1.02074	0.956763	0.946653	1.0071
210	O08749	Dihydrolipoyl dehydrogenase, mitochondrial OS=Mus musculus GN=Dld PE=1 SV=2 - [DLDH_MOUSE]	17	54.2382	953.204	33.6	1.05358	1.00597	1.05585	1.00538	0.966794	1.0088
211	Q8QZT1	Acetyl-CoA acetyltransferase, mitochondrial OS=Mus musculus GN=Acat1 PE=1 SV=1 - [THIL_MOUSE]	17	44.7873	930.515	50.24	1.00863	1.04554	1.04785	0.99815	0.945518	0.981563
212	Q9CZU6	Citrate synthase, mitochondrial OS=Mus musculus GN=Cs PE=1 SV=1 - [CISY_MOUSE]	17	51.7034	886.853	36.64	0.989543	1.0946	1.09682	1.04046	0.9482	0.990129
213	P12382	ATP-dependent 6-phosphofructokinase, liver type OS=Mus musculus GN=Pfkl PE=1 SV=4 - [PFKAL_MOUSE]	17	85.3054	727.193	33.72	1.00327	1.05475	1.04236	1.13132	0.965369	0.942502
214	P67778	Prohibitin OS=Mus musculus GN=Phb PE=1 SV=1 - [PHB_MOUSE]	17	29.8019	721.868	70.22	1.00459	0.925896	1.0088	0.950291	0.966644	0.992212
215	P06151	L-lactate dehydrogenase A chain OS=Mus musculus GN=Ldha PE=1 SV=3 - [LDHA_MOUSE]	17	36.4752	698.098	53.31	1.02543	1.09942	1.09488	1.05087	1.01061	0.995242
216	O35098	Dihydropyrimidinase-related protein 4 OS=Mus musculus GN=Dpysl4 PE=1 SV=1 - [DPYL4_MOUSE]	17	61.9225	657.39	39.16	1.04584	0.978707	0.935095	0.992907	0.996129	0.978756
217	Q5SQX6	Cytoplasmic FMR1-interacting protein 2 OS=Mus musculus GN=Cyfip2 PE=1 SV=2 - [CYFP2_MOUSE]	17	145.565	624.669	29.53	1.0312	0.977803	1.00295	1.0142	0.956943	0.924153
218	Q9CPY7	Cytosol aminopeptidase OS=Mus musculus GN=Lap3 PE=1 SV=3 - [AMPL_MOUSE]	17	56.1058	565.255	40.85	1.09202	1.04767	0.91172	1.0018	1.05375	1.0434
219	Q8BVE3	V-type proton ATPase subunit H OS=Mus musculus GN=Atp6v1h PE=1 SV=1 - [VATH_MOUSE]	17	55.8191	546.894	43.89	0.992701	1.04449	1.09474	1.03839	0.973964	0.979728
220	Q61753	D-3-phosphoglycerate dehydrogenase OS=Mus musculus GN=Phgdh PE=1 SV=3 - [SERA_MOUSE]	17	56.5491	505.059	34.52	1.01264	1.04848	0.950078	0.95545	1.02269	1.0877
221	Q61553	Fascin OS=Mus musculus GN=Fscn1 PE=1 SV=4 - [FSCN1_MOUSE]	17	54.4739	498.804	38.54	1.1046	0.929631	0.930203	0.958817	0.992617	1.00649
222	P80313	T-complex protein 1 subunit eta OS=Mus musculus GN=Cct7 PE=1 SV=1 - [TCPH_MOUSE]	17	59.6141	466.253	33.82	1.10561	1.0074	0.96178	1.03964	0.9711	1.02916
223	P29341	Polyadenylate-binding protein 1 OS=Mus musculus GN=Pabpc1 PE=1 SV=2 - [PABP1_MOUSE]	17	70.6259	429.742	30.5	1.08435	0.91977	0.922063	0.966918	0.995104	1.0077
224	Q9Z2Y3	Homer protein homolog 1 OS=Mus musculus GN=Homer1 PE=1 SV=2 - [HOME1_MOUSE]	17	41.3879	423.908	50.27	0.961504	1.11956	1.12066	0.994351	0.964457	0.940045
225	Q9R111	Guanine deaminase OS=Mus musculus GN=Gda PE=1 SV=1 - [GUAD_MOUSE]	17	50.9807	400.589	44.93	1.02638	1.00845	0.901551	0.966393	1.08681	0.963137
226	Q91XM9	Disks large homolog 2 OS=Mus musculus GN=Dlg2 PE=1 SV=2 - [DLG2_MOUSE]	17	94.8212	395.545	29.23	1.00554	1.07256	1.05221	1.05227	0.9655	0.901157
227	P23818	Glutamate receptor 1 OS=Mus musculus GN=Gria1 PE=1 SV=1 - [GRIA1_MOUSE]	17	101.504	362.097	25.91	0.940997	0.99394	1.09064	1.06802	0.979056	0.929883
228	P80316	T-complex protein 1 subunit epsilon OS=Mus musculus GN=Cct5 PE=1 SV=1 - [TCPE_MOUSE]	17	59.5859	353.704	42.33	1.04775	0.975679	1.01394	1.01197	1.04058	1.05207
229	B9EKR1	Receptor-type tyrosine-protein phosphatase zeta OS=Mus musculus GN=Ptprz1 PE=1 SV=1 - [PRPTZ_MOUSE]	17	254.247	305.467	7.35	0.978365	1.0457	1.08776	1.03129	0.944434	0.963953
230	Q8BIJ6	Isoleucine--tRNA ligase, mitochondrial OS=Mus musculus GN=Iars2 PE=1 SV=1 - [SYIM_MOUSE]	17	112.732	250.058	21.25	0.973248	1.08347	0.980908	1.03585	0.934858	0.940853
231	P23116	Eukaryotic translation initiation factor 3 subunit A OS=Mus musculus GN=Eif3a PE=1 SV=5 - [EIF3A_MOUSE]	17	161.838	202.589	11.83	0.971703	1.00481	0.952043	1.03291	1.02772	1.01114
232	Q8CGK3	Lon protease homolog, mitochondrial OS=Mus musculus GN=Lonp1 PE=1 SV=2 - [LONM_MOUSE]	17	105.776	191.273	18.12	1.0194	1.01271	0.878563	0.95266	1.00764	0.967953
233	Q61941	NAD(P) transhydrogenase, mitochondrial OS=Mus musculus GN=Nnt PE=1 SV=2 - [NNTM_MOUSE]	17	113.765	150.44	17.13	1.0368	0.991961	0.901986	1.11754	0.962406	0.993036
234	P17183	Gamma-enolase OS=Mus musculus GN=Eno2 PE=1 SV=2 - [ENOG_MOUSE]	16	47.267	4417.55	69.59	1.12081	0.984083	0.914124	1.03815	1.02169	1.03582
235	P18872	Guanine nucleotide-binding protein G(o) subunit alpha OS=Mus musculus GN=Gnao1 PE=1 SV=3 - [GNAO_MOUSE]	16	40.0589	2310.31	51.13	0.940341	1.12928	1.17577	0.99107	0.935304	0.994466
236	P28652	Calcium/calmodulin-dependent protein kinase type II subunit beta OS=Mus musculus GN=Camk2b PE=1 SV=2 - [KCC2B_MOUSE]	16	60.4227	1618.77	55.17	0.979739	1.01679	1.01255	1.03131	0.966866	1.00219
237	Q9DB20	ATP synthase subunit O, mitochondrial OS=Mus musculus GN=Atp5o PE=1 SV=1 - [ATPO_MOUSE]	16	23.3487	1403.02	69.95	0.962291	1.01186	1.1289	0.998357	0.992944	1.02916
238	P14094	Sodium/potassium-transporting ATPase subunit beta-1 OS=Mus musculus GN=Atp1b1 PE=1 SV=1 - [AT1B1_MOUSE]	16	35.172	1084.23	40.13	0.935145	1.03641	1.17364	0.949611	0.899845	0.993251
239	P10649	Glutathione S-transferase Mu 1 OS=Mus musculus GN=Gstm1 PE=1 SV=2 - [GSTM1_MOUSE]	16	25.9531	898.787	76.15	1.10631	1.08962	0.952095	0.970235	1.04445	1.06976
240	P50518	V-type proton ATPase subunit E 1 OS=Mus musculus GN=Atp6v1e1 PE=1 SV=2 - [VATE1_MOUSE]	16	26.1408	895.966	46.46	1.01419	1.03431	1.04871	0.999199	0.965506	1.00833
241	Q91VR2	ATP synthase subunit gamma, mitochondrial OS=Mus musculus GN=Atp5c1 PE=1 SV=1 - [ATPG_MOUSE]	16	32.8651	754.761	46.64	1.02243	0.91368	1.09838	0.974485	0.929062	0.987388
242	P51863	V-type proton ATPase subunit d 1 OS=Mus musculus GN=Atp6v0d1 PE=1 SV=2 - [VA0D1_MOUSE]	16	40.2752	654.184	47.58	0.910906	1.16693	1.14828	1.0677	0.923729	0.913165
243	Q61656	Probable ATP-dependent RNA helicase DDX5 OS=Mus musculus GN=Ddx5 PE=1 SV=2 - [DDX5_MOUSE]	16	69.2468	598.913	38.11	0.984538	1.07294	1.15576	0.958608	0.985027	1.0778
244	Q6Q477	Plasma membrane calcium-transporting ATPase 4 OS=Mus musculus GN=Atp2b4 PE=1 SV=1 - [AT2B4_MOUSE]	16	132.984	595.33	25.98	0.973186	1.05305	1.05668	0.833426	1.01606	1.03782
245	Q8VEM8	Phosphate carrier protein, mitochondrial OS=Mus musculus GN=Slc25a3 PE=1 SV=1 - [MPCP_MOUSE]	16	39.6065	557.932	40.34	0.909651	1.15169	1.13421	1.02238	0.908668	0.95421
246	P10637	Microtubule-associated protein tau OS=Mus musculus GN=Mapt PE=1 SV=3 - [TAU_MOUSE]	16	76.1973	540.785	20.6	1.05316	1.02525	1.0227	0.984665	1.03113	1.02146
247	Q3UM45	Protein phosphatase 1 regulatory subunit 7 OS=Mus musculus GN=Ppp1r7 PE=1 SV=2 - [PP1R7_MOUSE]	16	41.2665	444.571	43.77	1.00656	0.960596	0.880822	0.92468	1.07762	1.0335
248	Q9EQ20	Methylmalonate-semialdehyde dehydrogenase [acylating], mitochondrial OS=Mus musculus GN=Aldh6a1 PE=1 SV=1 - [MMSA_MOUSE]	16	57.8785	430.965	35.14	1.02961	1.05718	1.12868	0.95334	0.998825	1.06589
249	P61161	Actin-related protein 2 OS=Mus musculus GN=Actr2 PE=1 SV=1 - [ARP2_MOUSE]	16	44.7322	395.169	47.97	1.00631	1.00455	0.962742	1.07177	0.99292	0.956907
250	Q8VD37	SH3-containing GRB2-like protein 3-interacting protein 1 OS=Mus musculus GN=Sgip1 PE=1 SV=1 - [SGIP1_MOUSE]	16	86.0098	385.65	27.54	0.99986	1.00557	1.00139	0.969143	1.0329	1.0115
251	P80315	T-complex protein 1 subunit delta OS=Mus musculus GN=Cct4 PE=1 SV=3 - [TCPD_MOUSE]	16	58.0297	383.426	39.15	0.998251	1.00103	0.966102	0.978885	0.957226	0.994356
252	P80317	T-complex protein 1 subunit zeta OS=Mus musculus GN=Cct6a PE=1 SV=3 - [TCPZ_MOUSE]	16	57.9677	342.887	32.96	1.03553	1.01586	0.95684	1.03393	0.998796	1.01351
253	Q9CQA3	Succinate dehydrogenase [ubiquinone] iron-sulfur subunit, mitochondrial OS=Mus musculus GN=Sdhb PE=1 SV=1 - [SDHB_MOUSE]	16	31.7929	329.179	51.77	0.941673	1.01069	1.17855	1.00947	0.955669	0.981928
254	Q9Z268	RasGAP-activating-like protein 1 OS=Mus musculus GN=Rasal1 PE=1 SV=2 - [RASL1_MOUSE]	16	89.3388	294.379	21.4	1.02231	0.971188	1.01976	0.962368	1.02416	0.962385
255	P47708	Rabphilin-3A OS=Mus musculus GN=Rph3a PE=1 SV=2 - [RP3A_MOUSE]	16	75.4417	290.733	29.66	0.953677	0.968851	1.11004	0.977696	0.977218	1.03354
256	O70318	Band 4.1-like protein 2 OS=Mus musculus GN=Epb41l2 PE=1 SV=2 - [E41L2_MOUSE]	16	109.873	264.866	20.14	1.05324	1.09202	0.996833	1.0037	1.05717	1.05579
257	O54774	AP-3 complex subunit delta-1 OS=Mus musculus GN=Ap3d1 PE=1 SV=1 - [AP3D1_MOUSE]	16	134.996	225.844	15.51	0.955765	1.08476	1.08601	1.0131	0.972666	1.00899
258	Q9WU78	Programmed cell death 6-interacting protein OS=Mus musculus GN=Pdcd6ip PE=1 SV=3 - [PDC6I_MOUSE]	16	95.9642	218.974	20.37	1.05336	0.987376	0.977659	0.996514	0.985376	0.956559
259	Q7TMK9	Heterogeneous nuclear ribonucleoprotein Q OS=Mus musculus GN=Syncrip PE=1 SV=2 - [HNRPQ_MOUSE]	16	69.5896	216.469	26.16	0.946347	1.01396	1.06232	0.961355	0.942709	1.02188
260	Q61361	Brevican core protein OS=Mus musculus GN=Bcan PE=1 SV=2 - [PGCB_MOUSE]	16	95.7549	157.473	18.91	0.711292	1.70829	1.78109	0.822973	0.706409	1.21803
261	D3YZU1	SH3 and multiple ankyrin repeat domains protein 1 OS=Mus musculus GN=Shank1 PE=1 SV=1 - [SHAN1_MOUSE]	16	226.178	139.376	8.58	0.965484	0.978831	1.0093	1.02478	0.969527	0.963992
262	Q9JMH9	Unconventional myosin-XVIIIa OS=Mus musculus GN=Myo18a PE=1 SV=2 - [MY18A_MOUSE]	16	232.611	116.126	9.51	1.02999	1.0084	0.970254	0.992877	0.998128	0.962673
263	Q8BRT1	CLIP-associating protein 2 OS=Mus musculus GN=Clasp2 PE=1 SV=1 - [CLAP2_MOUSE]	16	140.652	115.598	15.55	0.918636	1.05251	1.03078	0.905225	0.980822	1.00772
264	P63101	14-3-3 protein zeta/delta OS=Mus musculus GN=Ywhaz PE=1 SV=1 - [1433Z_MOUSE]	15	27.7537	2625.68	78.37	1.10246	1.11863	0.975055	1.0376	1.01255	1.0182
265	Q64332	Synapsin-2 OS=Mus musculus GN=Syn2 PE=1 SV=2 - [SYN2_MOUSE]	15	63.3327	2453.89	42.15	1.03406	1.02801	0.993213	1.11941	1.00592	0.906982
266	P68510	14-3-3 protein eta OS=Mus musculus GN=Ywhah PE=1 SV=2 - [1433F_MOUSE]	15	28.194	1548.56	71.54	1.06137	1.10907	1.1356	1.07402	0.95623	1.01257
267	P17751	Triosephosphate isomerase OS=Mus musculus GN=Tpi1 PE=1 SV=4 - [TPIS_MOUSE]	15	32.1713	1466.96	47.83	1.12511	1.00141	1.02877	1.04231	0.982303	1.08645
268	Q9CZ13	Cytochrome b-c1 complex subunit 1, mitochondrial OS=Mus musculus GN=Uqcrc1 PE=1 SV=2 - [QCR1_MOUSE]	15	52.8185	1298.31	39.79	0.960082	1.01998	1.1085	1.01126	0.950672	0.967162
269	P97427	Dihydropyrimidinase-related protein 1 OS=Mus musculus GN=Crmp1 PE=1 SV=1 - [DPYL1_MOUSE]	15	62.1286	1111.68	40.91	1.09611	0.929206	0.92432	1.03037	1.03176	1.02265
270	P61264	Syntaxin-1B OS=Mus musculus GN=Stx1b PE=1 SV=1 - [STX1B_MOUSE]	15	33.2238	982.209	53.47	0.932851	1.14735	1.08217	0.904435	0.924613	0.986562
271	P16125	L-lactate dehydrogenase B chain OS=Mus musculus GN=Ldhb PE=1 SV=2 - [LDHB_MOUSE]	15	36.549	968.477	46.41	1.02554	1.18002	1.08285	1.03438	0.965734	1.03381
272	Q9DCT2	NADH dehydrogenase [ubiquinone] iron-sulfur protein 3, mitochondrial OS=Mus musculus GN=Ndufs3 PE=1 SV=2 - [NDUS3_MOUSE]	15	30.1305	853.192	49.43	0.950717	0.98016	1.0721	1.04928	1.00442	1.02867
273	Q9CWZ7	Gamma-soluble NSF attachment protein OS=Mus musculus GN=Napg PE=1 SV=1 - [SNAG_MOUSE]	15	34.7103	846.572	49.04	0.959401	1.01993	1.09932	1.01225	0.96661	0.975221
274	Q9JI91	Alpha-actinin-2 OS=Mus musculus GN=Actn2 PE=1 SV=2 - [ACTN2_MOUSE]	15	103.768	719.64	33.11	0.853489	0.94301	0.902148	1.10375	0.997733	0.83969
275	Q7TQD2	Tubulin polymerization-promoting protein OS=Mus musculus GN=Tppp PE=1 SV=1 - [TPPP_MOUSE]	15	23.5601	654.502	62.39	1.04169	1.03649	0.98217	1.00533	1.06598	1.25131
276	Q9D0K2	Succinyl-CoA:3-ketoacid coenzyme A transferase 1, mitochondrial OS=Mus musculus GN=Oxct1 PE=1 SV=1 - [SCOT1_MOUSE]	15	55.953	636.138	36.35	0.979795	1.0166	1.04856	0.982728	0.971835	0.968727
277	O08709	Peroxiredoxin-6 OS=Mus musculus GN=Prdx6 PE=1 SV=3 - [PRDX6_MOUSE]	15	24.855	507.039	66.52	1.22404	1.06789	0.951757	1.11951	0.966897	1.05637
278	P47738	Aldehyde dehydrogenase, mitochondrial OS=Mus musculus GN=Aldh2 PE=1 SV=1 - [ALDH2_MOUSE]	15	56.5018	491.281	35.84	0.997335	1.09903	1.05408	1.03053	1.01747	1.0601
279	Q99LX0	Protein/nucleic acid deglycase DJ-1 OS=Mus musculus GN=Park7 PE=1 SV=1 - [PARK7_MOUSE]	15	20.0084	393.632	76.72	1.08304	1.06123	1.00663	1.05312	1.01142	1.03082
280	Q9JII6	Alcohol dehydrogenase [NADP(+)] OS=Mus musculus GN=Akr1a1 PE=1 SV=3 - [AK1A1_MOUSE]	15	36.5639	354.443	46.15	1.1017	0.997235	0.858558	0.964974	1.11126	1.00878
281	O89053	Coronin-1A OS=Mus musculus GN=Coro1a PE=1 SV=5 - [COR1A_MOUSE]	15	50.9569	324.454	29.72	1.03602	1.06147	1.04295	0.962859	0.992988	1.00957
282	Q9JIA1	Leucine-rich glioma-inactivated protein 1 OS=Mus musculus GN=Lgi1 PE=1 SV=1 - [LGI1_MOUSE]	15	63.6033	294.46	27.47	0.889529	1.14411	1.17746	1.03522	0.991071	0.999696
283	Q99PU5	Long-chain-fatty-acid--CoA ligase ACSBG1 OS=Mus musculus GN=Acsbg1 PE=1 SV=1 - [ACBG1_MOUSE]	15	80.3745	273.948	24.97	1.01107	0.993436	1.00456	0.994521	0.989437	0.952628
284	O70133	ATP-dependent RNA helicase A OS=Mus musculus GN=Dhx9 PE=1 SV=2 - [DHX9_MOUSE]	15	149.381	214.965	12.39	0.925561	1.02205	1.00544	0.965232	0.992075	0.975162
285	Q8BH44	Coronin-2B OS=Mus musculus GN=Coro2b PE=1 SV=2 - [COR2B_MOUSE]	15	54.9012	214.882	32.92	0.978139	1.02328	1.04207	0.951501	1.0683	1.00187
286	Q6R891	Neurabin-2 OS=Mus musculus GN=Ppp1r9b PE=1 SV=1 - [NEB2_MOUSE]	15	89.4657	209.198	22.52	1.04626	0.911942	0.935225	1.01825	1.00989	0.987407
287	P70398	Probable ubiquitin carboxyl-terminal hydrolase FAF-X OS=Mus musculus GN=Usp9x PE=1 SV=2 - [USP9X_MOUSE]	15	290.526	179.704	6.68	1.01385	1.03483	0.982632	0.973753	0.932157	0.98393
288	Q9CR16	Peptidyl-prolyl cis-trans isomerase D OS=Mus musculus GN=Ppid PE=1 SV=3 - [PPID_MOUSE]	15	40.7167	174.883	40	1.10104	0.932064	0.897163	1.06255	1.04197	0.982355
289	Q922B2	Aspartate--tRNA ligase, cytoplasmic OS=Mus musculus GN=Dars PE=1 SV=2 - [SYDC_MOUSE]	15	57.1112	165.157	32.53	1.01139	1.00005	0.928901	1.056	1.00828	0.945162
290	P27546	Microtubule-associated protein 4 OS=Mus musculus GN=Map4 PE=1 SV=3 - [MAP4_MOUSE]	15	117.357	148.726	16.09	1.00917	1.02512	1.06377	1.00297	1.03628	1.08848
291	Q00612	Glucose-6-phosphate 1-dehydrogenase X OS=Mus musculus GN=G6pdx PE=1 SV=3 - [G6PD1_MOUSE]	15	59.2248	141.884	31.07	0.98588	0.929117	0.923884	0.964275	1.07558	1.01057
292	P28740	Kinesin-like protein KIF2A OS=Mus musculus GN=Kif2a PE=1 SV=2 - [KIF2A_MOUSE]	15	79.7066	139.101	18.87	1.0018	0.977255	1.03291	1.03228	0.970585	0.957239
293	Q921G7	Electron transfer flavoprotein-ubiquinone oxidoreductase, mitochondrial OS=Mus musculus GN=Etfdh PE=1 SV=1 - [ETFD_MOUSE]	15	68.0476	136.273	30.03	0.98145	1.01722	1.04213	1.00159	1.03273	1.01036
294	P70175	Disks large homolog 3 OS=Mus musculus GN=Dlg3 PE=1 SV=1 - [DLG3_MOUSE]	15	93.4242	131.974	21.79	1.04249	0.940402	0.968863	0.976935	0.989638	0.950648
295	Q3U1J4	DNA damage-binding protein 1 OS=Mus musculus GN=Ddb1 PE=1 SV=2 - [DDB1_MOUSE]	15	126.772	123.106	12.28	1.00685	0.954144	0.906252	1.00118	1.03506	1.00046
296	Q80UG2	Plexin-A4 OS=Mus musculus GN=Plxna4 PE=1 SV=3 - [PLXA4_MOUSE]	15	212.423	94.8544	10.25	0.919047	1.00706	1.03152	0.973173	1.03855	0.979693
297	Q60930	Voltage-dependent anion-selective channel protein 2 OS=Mus musculus GN=Vdac2 PE=1 SV=2 - [VDAC2_MOUSE]	14	31.7126	1156.72	59.66	0.980529	1.03499	1.13233	0.950496	0.988725	1.0117
298	Q62420	Endophilin-A1 OS=Mus musculus GN=Sh3gl2 PE=1 SV=2 - [SH3G2_MOUSE]	14	39.9301	1108.88	48.86	0.97859	1.14794	1.13147	0.988746	0.962115	1.01568
299	Q62188	Dihydropyrimidinase-related protein 3 OS=Mus musculus GN=Dpysl3 PE=1 SV=1 - [DPYL3_MOUSE]	14	61.8971	1052.85	44.91	1.13367	0.978376	0.909395	1.03117	1.01607	1.07353
300	Q8BZ98	Dynamin-3 OS=Mus musculus GN=Dnm3 PE=1 SV=1 - [DYN3_MOUSE]	14	97.1296	949.651	34.3	0.991194	1.06582	0.983356	1.01846	0.987993	0.956314
301	Q8BLK3	Limbic system-associated membrane protein OS=Mus musculus GN=Lsamp PE=1 SV=1 - [LSAMP_MOUSE]	14	38.0625	578.384	45.16	0.976805	1.01339	0.987201	1.04092	0.989708	0.960975
302	Q9CR62	Mitochondrial 2-oxoglutarate/malate carrier protein OS=Mus musculus GN=Slc25a11 PE=1 SV=3 - [M2OM_MOUSE]	14	34.1329	544.142	47.45	0.925099	1.07709	1.04588	1.07274	0.941595	0.92132
303	P40124	Adenylyl cyclase-associated protein 1 OS=Mus musculus GN=Cap1 PE=1 SV=4 - [CAP1_MOUSE]	14	51.5324	481.947	41.98	1.1175	0.935512	0.86979	1.04922	0.988961	0.96151
304	P56399	Ubiquitin carboxyl-terminal hydrolase 5 OS=Mus musculus GN=Usp5 PE=1 SV=1 - [UBP5_MOUSE]	14	95.7724	480.027	18.41	1.06258	0.987616	0.938238	0.992529	1.02105	0.994536
305	P48036	Annexin A5 OS=Mus musculus GN=Anxa5 PE=1 SV=1 - [ANXA5_MOUSE]	14	35.7302	469.604	48.28	1.11296	1.06879	0.922121	1.04278	0.986827	1.09069
306	Q9Z0P4	Paralemmin-1 OS=Mus musculus GN=Palm PE=1 SV=1 - [PALM_MOUSE]	14	41.5888	463.988	37.6	1.03144	1.04708	1.0972	1.00756	0.92304	1.00006
307	Q9CZC8	Secernin-1 OS=Mus musculus GN=Scrn1 PE=1 SV=1 - [SCRN1_MOUSE]	14	46.2966	448.547	37.44	1.06193	1.1017	0.959827	0.986518	1.02675	1.03821
308	Q80TZ3	Putative tyrosine-protein phosphatase auxilin OS=Mus musculus GN=Dnajc6 PE=1 SV=2 - [AUXI_MOUSE]	14	102.235	424.08	17.16	0.981638	0.996736	1.01763	0.97622	0.980073	1.0044
309	Q99LC3	NADH dehydrogenase [ubiquinone] 1 alpha subcomplex subunit 10, mitochondrial OS=Mus musculus GN=Ndufa10 PE=1 SV=1 - [NDUAA_MOUSE]	14	40.5777	418.209	33.24	0.935292	1.02339	1.15867	1.01168	0.962364	1.00159
310	Q9R1V6	Disintegrin and metalloproteinase domain-containing protein 22 OS=Mus musculus GN=Adam22 PE=1 SV=2 - [ADA22_MOUSE]	14	99.6507	396.484	22.12	0.903761	1.12536	1.145	0.947414	1.02133	1.02128
311	Q8R3V5	Endophilin-B2 OS=Mus musculus GN=Sh3glb2 PE=1 SV=2 - [SHLB2_MOUSE]	14	44.4759	395.964	35.75	1.03006	0.976649	1.01512	1.00427	1.01531	0.994667
312	Q9JLM8	Serine/threonine-protein kinase DCLK1 OS=Mus musculus GN=Dclk1 PE=1 SV=1 - [DCLK1_MOUSE]	14	84.101	388.379	22.22	1.00517	0.941813	1.02663	0.989989	1.0025	0.983366
313	Q9CPV4	Glyoxalase domain-containing protein 4 OS=Mus musculus GN=Glod4 PE=1 SV=1 - [GLOD4_MOUSE]	14	33.2955	334.582	55.03	1.10694	0.930149	0.814507	0.926922	1.08224	1.10202
314	Q91WD5	NADH dehydrogenase [ubiquinone] iron-sulfur protein 2, mitochondrial OS=Mus musculus GN=Ndufs2 PE=1 SV=1 - [NDUS2_MOUSE]	14	52.5917	332.694	38.44	0.948266	1.0322	1.10357	1.01591	0.985371	0.987601
315	O88844	Isocitrate dehydrogenase [NADP] cytoplasmic OS=Mus musculus GN=Idh1 PE=1 SV=2 - [IDHC_MOUSE]	14	46.6445	329.504	38.65	1.17347	1.04029	0.982446	1.12755	0.915083	0.9703
316	Q99JY0	Trifunctional enzyme subunit beta, mitochondrial OS=Mus musculus GN=Hadhb PE=1 SV=1 - [ECHB_MOUSE]	14	51.3534	319.727	31.79	1.0429	0.994416	1.01893	0.905822	1.07659	1.05453
317	Q9JKK7	Tropomodulin-2 OS=Mus musculus GN=Tmod2 PE=1 SV=2 - [TMOD2_MOUSE]	14	39.4866	302.27	46.44	0.983606	1.05301	1.05431	1.04604	0.973064	0.971366
318	Q9D8E6	60S ribosomal protein L4 OS=Mus musculus GN=Rpl4 PE=1 SV=3 - [RL4_MOUSE]	14	47.124	286.743	33.89	1.00419	1.00437	1.12134	0.980443	0.975118	1.05669
319	Q9D8N0	Elongation factor 1-gamma OS=Mus musculus GN=Eef1g PE=1 SV=3 - [EF1G_MOUSE]	14	50.0292	282.459	32.04	1.03389	1.03582	1.0414	1.05026	0.979872	0.972884
320	Q9WV34	MAGUK p55 subfamily member 2 OS=Mus musculus GN=Mpp2 PE=1 SV=1 - [MPP2_MOUSE]	14	61.5168	266.282	29.17	0.952586	1.05436	1.07939	0.935469	0.97557	0.946704
321	Q810U4	Neuronal cell adhesion molecule OS=Mus musculus GN=Nrcam PE=1 SV=2 - [NRCAM_MOUSE]	14	138.435	248.486	14.97	0.970068	1.06029	1.07982	1.01841	0.966766	1.04188
322	Q9EPN1	Neurobeachin OS=Mus musculus GN=Nbea PE=1 SV=1 - [NBEA_MOUSE]	14	326.536	242.827	5.69	1.06523	0.990716	0.998093	0.983908	1.02199	0.985571
323	Q8R0S2	IQ motif and SEC7 domain-containing protein 1 OS=Mus musculus GN=Iqsec1 PE=1 SV=2 - [IQEC1_MOUSE]	14	107.948	238.849	20.29	0.942142	1.09248	1.12735	0.969868	0.983465	0.980337
324	P31938	Dual specificity mitogen-activated protein kinase kinase 1 OS=Mus musculus GN=Map2k1 PE=1 SV=2 - [MP2K1_MOUSE]	14	43.4464	218.835	41.22	1.02685	1.11625	1.00452	1.07938	1.00682	1.01651
325	Q60598	Src substrate cortactin OS=Mus musculus GN=Cttn PE=1 SV=2 - [SRC8_MOUSE]	14	61.2124	218.07	23.99	1.03587	1.02134	0.985986	1.03212	1.03309	0.951424
326	Q9Z218	Dipeptidyl aminopeptidase-like protein 6 OS=Mus musculus GN=Dpp6 PE=1 SV=1 - [DPP6_MOUSE]	14	91.2031	206.657	18.53	0.874458	1.03603	1.00362	1.01265	0.921007	0.970173
327	Q9Z0X1	Apoptosis-inducing factor 1, mitochondrial OS=Mus musculus GN=Aifm1 PE=1 SV=1 - [AIFM1_MOUSE]	14	66.7238	204.276	25.98	0.918757	0.980412	1.08332	0.929659	0.999069	1.00497
328	Q99K85	Phosphoserine aminotransferase OS=Mus musculus GN=Psat1 PE=1 SV=1 - [SERC_MOUSE]	14	40.4467	199.328	42.16	0.992536	1.12625	1.00437	1.01963	1.00809	1.05315
329	Q8CGY8	UDP-N-acetylglucosamine--peptide N-acetylglucosaminyltransferase 110 kDa subunit OS=Mus musculus GN=Ogt PE=1 SV=2 - [OGT1_MOUSE]	14	116.877	199.017	15.87	1.00663	1.01942	1.03688	1.0006	1.00798	0.998781
330	Q9EPJ9	ADP-ribosylation factor GTPase-activating protein 1 OS=Mus musculus GN=Arfgap1 PE=1 SV=2 - [ARFG1_MOUSE]	14	45.2605	181.358	35.99	1.00642	1.04546	1.1214	0.998054	0.99733	0.972746
331	P53810	Phosphatidylinositol transfer protein alpha isoform OS=Mus musculus GN=Pitpna PE=1 SV=2 - [PIPNA_MOUSE]	14	31.873	178.906	45.76	1.01422	0.981864	0.991274	1.05692	1.0541	1.02454
332	Q99P72	Reticulon-4 OS=Mus musculus GN=Rtn4 PE=1 SV=2 - [RTN4_MOUSE]	14	126.535	155.489	13.25	0.967898	1.04321	1.02834	0.969275	0.977755	1.03085
333	Q91ZJ5	UTP--glucose-1-phosphate uridylyltransferase OS=Mus musculus GN=Ugp2 PE=1 SV=3 - [UGPA_MOUSE]	14	56.9437	149.732	27.95	1.13864	0.972974	0.904521	1.04897	1.02108	1.03915
334	Q8JZQ2	AFG3-like protein 2 OS=Mus musculus GN=Afg3l2 PE=1 SV=1 - [AFG32_MOUSE]	14	89.4626	142.119	18.33	0.958124	0.917499	1.03229	0.910815	1.01455	0.9995
335	Q9JLN9	Serine/threonine-protein kinase mTOR OS=Mus musculus GN=Mtor PE=1 SV=2 - [MTOR_MOUSE]	14	288.605	127.993	6.71	0.872148	1.02262	0.998816	1.06859	0.969131	0.958874
336	Q8C854	Myelin expression factor 2 OS=Mus musculus GN=Myef2 PE=1 SV=1 - [MYEF2_MOUSE]	14	63.2543	108.214	25.38	0.965963	0.961768	1.03717	0.92013	0.976034	1.05352
337	Q91WQ3	Tyrosine--tRNA ligase, cytoplasmic OS=Mus musculus GN=Yars PE=1 SV=3 - [SYYC_MOUSE]	14	59.0681	90.4993	28.03	1.04077	0.994364	0.947439	0.988075	1.05431	0.978494
338	P61982	14-3-3 protein gamma OS=Mus musculus GN=Ywhag PE=1 SV=2 - [1433G_MOUSE]	13	28.2849	1750.2	68.02	1.12085	0.987502	0.981455	1.053	0.96477	1.00153
339	P17742	Peptidyl-prolyl cis-trans isomerase A OS=Mus musculus GN=Ppia PE=1 SV=2 - [PPIA_MOUSE]	13	17.9599	1691.1	65.85	1.09793	1.02186	1.04678	1.04479	0.985767	1.06089
340	P46096	Synaptotagmin-1 OS=Mus musculus GN=Syt1 PE=1 SV=1 - [SYT1_MOUSE]	13	47.3878	1216.47	36.82	0.974295	1.09968	1.19994	1.09153	0.750995	0.913747
341	O35643	AP-1 complex subunit beta-1 OS=Mus musculus GN=Ap1b1 PE=1 SV=2 - [AP1B1_MOUSE]	13	103.869	1018.95	33.3	1.01916	1.04159	0.986855	1.02084	0.930095	0.966903
342	Q61598	Rab GDP dissociation inhibitor beta OS=Mus musculus GN=Gdi2 PE=1 SV=1 - [GDIB_MOUSE]	13	50.5047	858.851	49.89	1.00755	1.05986	0.958962	1.01666	0.989948	1.005
343	Q9R1Q8	Transgelin-3 OS=Mus musculus GN=Tagln3 PE=1 SV=1 - [TAGL3_MOUSE]	13	22.4562	824.962	74.87	1.04548	1.00037	1.04667	0.981729	0.984656	1.01975
344	Q91V61	Sideroflexin-3 OS=Mus musculus GN=Sfxn3 PE=1 SV=1 - [SFXN3_MOUSE]	13	35.3835	812.257	57.32	0.942822	0.994727	1.06373	1.02377	0.967548	0.98969
345	Q61885	Myelin-oligodendrocyte glycoprotein OS=Mus musculus GN=Mog PE=1 SV=1 - [MOG_MOUSE]	13	28.2528	811.008	39.84	0.790689	1.15201	1.2252	0.647846	1.35686	1.32033
346	P99029	Peroxiredoxin-5, mitochondrial OS=Mus musculus GN=Prdx5 PE=1 SV=2 - [PRDX5_MOUSE]	13	21.8835	722.816	60.48	1.01393	1.08166	1.09938	1.02186	0.944636	1.05297
347	P62761	Visinin-like protein 1 OS=Mus musculus GN=Vsnl1 PE=1 SV=2 - [VISL1_MOUSE]	13	22.128	712.155	81.68	0.929025	1.2344	1.17192	1.00327	0.925124	1.00881
348	P28663	Beta-soluble NSF attachment protein OS=Mus musculus GN=Napb PE=1 SV=2 - [SNAB_MOUSE]	13	33.5355	692.188	59.4	0.977814	1.08888	1.09247	1.05565	0.95439	0.974781
349	P18760	Cofilin-1 OS=Mus musculus GN=Cfl1 PE=1 SV=3 - [COF1_MOUSE]	13	18.5477	582.214	86.14	1.13493	1.01582	0.973058	1.05393	1.00301	1.00749
350	Q61548	Clathrin coat assembly protein AP180 OS=Mus musculus GN=Snap91 PE=1 SV=1 - [AP180_MOUSE]	13	91.7936	568.326	22.42	0.980607	1.03822	1.11534	1.02977	0.955479	0.945627
351	P57746	V-type proton ATPase subunit D OS=Mus musculus GN=Atp6v1d PE=1 SV=1 - [VATD_MOUSE]	13	28.3514	536.865	53.04	1.0075	0.975922	1.02131	1.02489	1.01353	0.96108
352	Q9Z140	Copine-6 OS=Mus musculus GN=Cpne6 PE=1 SV=1 - [CPNE6_MOUSE]	13	61.7416	533.639	26.75	1.02555	1.03374	1.00359	1.07976	0.987626	0.881044
353	Q3UHL1	CaM kinase-like vesicle-associated protein OS=Mus musculus GN=Camkv PE=1 SV=2 - [CAMKV_MOUSE]	13	54.7855	524.793	27.93	1.03081	1.0866	0.982784	1.23681	0.964122	0.877038
354	Q8VDQ8	NAD-dependent protein deacetylase sirtuin-2 OS=Mus musculus GN=Sirt2 PE=1 SV=2 - [SIR2_MOUSE]	13	43.2284	511.806	33.68	0.862344	1.17652	1.16943	0.72716	1.37616	1.37409
355	Q8BIZ1	Ankyrin repeat and sterile alpha motif domain-containing protein 1B OS=Mus musculus GN=Anks1b PE=1 SV=3 - [ANS1B_MOUSE]	13	138.961	439.075	9.77	0.867934	1.12316	1.156	1.16098	0.943729	0.886956
356	Q9ES97	Reticulon-3 OS=Mus musculus GN=Rtn3 PE=1 SV=2 - [RTN3_MOUSE]	13	103.814	432.574	15.15	0.941928	1.02258	1.08026	1.01416	0.955552	0.987065
357	Q9QYG0	Protein NDRG2 OS=Mus musculus GN=Ndrg2 PE=1 SV=1 - [NDRG2_MOUSE]	13	40.7632	421.604	50.67	1.04933	1.07238	1.01623	1.02314	0.962966	1.01193
358	P97300	Neuroplastin OS=Mus musculus GN=Nptn PE=1 SV=3 - [NPTN_MOUSE]	13	44.3454	413.531	31.99	0.945176	0.980525	1.08536	1.02032	0.980666	0.958217
359	Q8VDM4	26S proteasome non-ATPase regulatory subunit 2 OS=Mus musculus GN=Psmd2 PE=1 SV=1 - [PSMD2_MOUSE]	13	100.139	343.054	17.18	0.877302	1.15953	1.08363	1.04458	1.03617	0.983739
360	Q8BH95	Enoyl-CoA hydratase, mitochondrial OS=Mus musculus GN=Echs1 PE=1 SV=1 - [ECHM_MOUSE]	13	31.4542	303.684	50.34	1.0318	0.963056	1.04823	1.03891	1.00209	1.06353
361	P47911	60S ribosomal protein L6 OS=Mus musculus GN=Rpl6 PE=1 SV=3 - [RL6_MOUSE]	13	33.4889	296.494	40.2	1.00936	0.952778	1.0126	0.990296	1.03203	1.07178
362	Q80TL4	PHD finger protein 24 OS=Mus musculus GN=Phf24 PE=1 SV=2 - [PHF24_MOUSE]	13	45.1944	295.088	32.25	1.10485	0.988528	1.01824	1.04264	0.963784	1.03925
363	P70168	Importin subunit beta-1 OS=Mus musculus GN=Kpnb1 PE=1 SV=2 - [IMB1_MOUSE]	13	97.1221	291.907	17.01	0.962308	1.06822	1.04615	1.05483	0.963036	0.941214
364	P35564	Calnexin OS=Mus musculus GN=Canx PE=1 SV=1 - [CALX_MOUSE]	13	67.2357	288.716	19.12	1.01958	1.07419	1.08135	1.04638	0.909582	0.992105
365	Q3TXS7	26S proteasome non-ATPase regulatory subunit 1 OS=Mus musculus GN=Psmd1 PE=1 SV=1 - [PSMD1_MOUSE]	13	105.663	266.988	15.84	0.990288	1.02971	1.12864	1.00413	0.986638	1.05569
366	Q9WUM4	Coronin-1C OS=Mus musculus GN=Coro1c PE=1 SV=2 - [COR1C_MOUSE]	13	53.087	265.858	26.16	0.993341	1.0861	1.0007	1.01473	0.967152	0.955189
367	P63005	Platelet-activating factor acetylhydrolase IB subunit alpha OS=Mus musculus GN=Pafah1b1 PE=1 SV=2 - [LIS1_MOUSE]	13	46.6401	258.619	38.78	1.00333	1.13521	1.11962	1.07887	0.99942	0.99715
368	Q9CZ44	NSFL1 cofactor p47 OS=Mus musculus GN=Nsfl1c PE=1 SV=1 - [NSF1C_MOUSE]	13	40.6854	256.993	42.7	0.978178	0.945418	0.909278	1.07084	1.01136	0.964568
369	Q8R071	Inositol-trisphosphate 3-kinase A OS=Mus musculus GN=Itpka PE=1 SV=1 - [IP3KA_MOUSE]	13	50.9029	256.872	30.5	1.01355	1.04399	0.919226	0.940518	1.05423	0.927394
370	Q9JKR6	Hypoxia up-regulated protein 1 OS=Mus musculus GN=Hyou1 PE=1 SV=1 - [HYOU1_MOUSE]	13	111.112	251.882	14.91	1.04007	0.986273	0.966087	0.996244	1.03935	1.02398
371	P97351	40S ribosomal protein S3a OS=Mus musculus GN=Rps3a PE=1 SV=3 - [RS3A_MOUSE]	13	29.8657	247.092	46.21	1.05454	0.990266	1.05056	1.00912	1.00091	0.985314
372	P62702	40S ribosomal protein S4, X isoform OS=Mus musculus GN=Rps4x PE=1 SV=2 - [RS4X_MOUSE]	13	29.5791	236.992	46.01	1.04477	0.914467	1.05599	0.930741	1.07129	1.05083
373	O70161	Phosphatidylinositol 4-phosphate 5-kinase type-1 gamma OS=Mus musculus GN=Pip5k1c PE=1 SV=2 - [PI51C_MOUSE]	13	72.3633	231.935	22.84	0.946475	1.12552	1.0543	1.04076	0.95991	1.03146
374	P16054	Protein kinase C epsilon type OS=Mus musculus GN=Prkce PE=1 SV=1 - [KPCE_MOUSE]	13	83.507	217.18	19	0.976271	0.981097	0.993775	1.01069	0.972767	0.955194
375	P68040	Receptor of activated protein C kinase 1 OS=Mus musculus GN=Rack1 PE=1 SV=3 - [RACK1_MOUSE]	13	35.0546	209.261	45.43	1.09799	0.962342	1.01643	1.05899	0.969008	1.0298
376	Q91VI7	Ribonuclease inhibitor OS=Mus musculus GN=Rnh1 PE=1 SV=1 - [RINI_MOUSE]	13	49.7841	198.998	42.54	1.02392	0.981405	0.952592	0.935599	1.0156	1.0804
377	Q9D855	Cytochrome b-c1 complex subunit 7 OS=Mus musculus GN=Uqcrb PE=1 SV=3 - [QCR7_MOUSE]	13	13.519	195.554	74.77	0.963083	1.01002	1.10536	1.01834	0.994476	0.984791
378	Q6PER3	Microtubule-associated protein RP/EB family member 3 OS=Mus musculus GN=Mapre3 PE=1 SV=1 - [MARE3_MOUSE]	13	31.946	195.277	44.48	1.02092	0.977179	0.987173	0.910918	1.01192	1.01554
379	P48758	Carbonyl reductase [NADPH] 1 OS=Mus musculus GN=Cbr1 PE=1 SV=3 - [CBR1_MOUSE]	13	30.622	195.048	53.07	1.07393	0.976241	0.968978	1.09121	1.04544	1.04793
380	P11627	Neural cell adhesion molecule L1 OS=Mus musculus GN=L1cam PE=1 SV=1 - [L1CAM_MOUSE]	13	140.881	194.069	13.81	0.892753	0.931633	0.983531	0.963544	0.975369	0.978903
381	Q60875	Rho guanine nucleotide exchange factor 2 OS=Mus musculus GN=Arhgef2 PE=1 SV=4 - [ARHG2_MOUSE]	13	111.905	175.404	16.95	1.00118	1.01283	1.08656	0.954613	1.00667	0.999225
382	P35438	Glutamate receptor ionotropic, NMDA 1 OS=Mus musculus GN=Grin1 PE=1 SV=1 - [NMDZ1_MOUSE]	13	105.414	169.315	14.39	0.962031	0.968505	1.08254	1.12087	0.94276	0.888571
383	Q9Z0H8	CAP-Gly domain-containing linker protein 2 OS=Mus musculus GN=Clip2 PE=1 SV=2 - [CLIP2_MOUSE]	13	115.84	163.502	17.19	0.948127	1.05051	0.994383	0.980531	0.983143	0.975274
384	Q8BMG7	Rab3 GTPase-activating protein non-catalytic subunit OS=Mus musculus GN=Rab3gap2 PE=1 SV=2 - [RBGPR_MOUSE]	13	152.438	162.628	11.13	0.948849	0.998309	1.03619	0.985658	0.979634	1.00158
385	Q8C1A5	Thimet oligopeptidase OS=Mus musculus GN=Thop1 PE=1 SV=1 - [THOP1_MOUSE]	13	77.9762	159.613	24.6	1.10304	0.96153	0.937996	1.00184	1.04624	1.00976
386	Q5SSL4	Active breakpoint cluster region-related protein OS=Mus musculus GN=Abr PE=1 SV=1 - [ABR_MOUSE]	13	97.6052	154.745	18.63	0.952241	1.07729	0.969844	1.05391	0.975897	1.01395
387	Q68FF6	ARF GTPase-activating protein GIT1 OS=Mus musculus GN=Git1 PE=1 SV=1 - [GIT1_MOUSE]	13	85.2473	147.886	21.3	0.911419	1.00459	1.08041	0.902654	1.03092	1.03224
388	Q6NZL0	Protein SOGA3 OS=Mus musculus GN=Soga3 PE=1 SV=2 - [SOGA3_MOUSE]	13	103.416	134.251	13.97	0.9646	1.06137	1.01795	1.02623	1.01168	0.985801
389	Q9JLZ3	Methylglutaconyl-CoA hydratase, mitochondrial OS=Mus musculus GN=Auh PE=1 SV=1 - [AUHM_MOUSE]	13	33.374	126.746	37.9	0.994545	0.941938	1.01996	0.925681	1.01913	0.980364
390	Q8BL66	Early endosome antigen 1 OS=Mus musculus GN=Eea1 PE=1 SV=2 - [EEA1_MOUSE]	13	160.817	121.609	9.85	1.09706	0.926959	0.967468	1.00582	1.0364	0.962038
391	Q9EQF6	Dihydropyrimidinase-related protein 5 OS=Mus musculus GN=Dpysl5 PE=1 SV=1 - [DPYL5_MOUSE]	13	61.4773	115.679	24.11	1.07056	0.882677	0.801722	0.948884	1.04192	0.995247
392	Q8R570	Synaptosomal-associated protein 47 OS=Mus musculus GN=Snap47 PE=1 SV=1 - [SNP47_MOUSE]	13	46.4951	93.3395	40.44	1.06241	0.944492	1.00766	0.960228	1.05202	1.03281
393	P22892	AP-1 complex subunit gamma-1 OS=Mus musculus GN=Ap1g1 PE=1 SV=3 - [AP1G1_MOUSE]	13	91.2921	93.0524	15.09	0.914541	1.04949	1.11235	0.980106	0.990577	0.989815
394	P48962	ADP/ATP translocase 1 OS=Mus musculus GN=Slc25a4 PE=1 SV=4 - [ADT1_MOUSE]	12	32.8831	2795.06	59.06	0.941507	1.04951	1.10978	0.982981	0.920817	0.95874
395	P17156	Heat shock-related 70 kDa protein 2 OS=Mus musculus GN=Hspa2 PE=1 SV=2 - [HSP72_MOUSE]	12	69.5987	1414.98	43.6	0.995599	1.03655	1.05403	1.00022	1.0557	1.01669
396	P0DP28	Calmodulin-3 OS=Mus musculus GN=Calm3 PE=1 SV=1 - [CALM3_MOUSE]	12	16.8268	1343.59	61.07	1.04789	1.09117	1.01684	1.01705	1.0502	1.02267
397	O88569	Heterogeneous nuclear ribonucleoproteins A2/B1 OS=Mus musculus GN=Hnrnpa2b1 PE=1 SV=2 - [ROA2_MOUSE]	12	37.3797	1264.72	41.93	1.08943	0.926633	1.05812	0.970251	1.00008	1.04986
398	P68254	14-3-3 protein theta OS=Mus musculus GN=Ywhaq PE=1 SV=1 - [1433T_MOUSE]	12	27.7608	1130.82	62.45	1.06906	1.10611	0.96467	1.05225	1.03171	0.976345
399	P70296	Phosphatidylethanolamine-binding protein 1 OS=Mus musculus GN=Pebp1 PE=1 SV=3 - [PEBP1_MOUSE]	12	20.8173	908.144	92.51	1.12226	0.999409	0.937359	1.05842	1.06166	1.06581
400	Q9D6J6	NADH dehydrogenase [ubiquinone] flavoprotein 2, mitochondrial OS=Mus musculus GN=Ndufv2 PE=1 SV=2 - [NDUV2_MOUSE]	12	27.2679	720.18	49.6	0.962155	1.00072	1.0688	0.976596	0.995934	1.0243
401	P54227	Stathmin OS=Mus musculus GN=Stmn1 PE=1 SV=2 - [STMN1_MOUSE]	12	17.2639	664.883	58.39	1.11285	1.01922	0.979632	0.945219	0.920163	1.07697
402	P51150	Ras-related protein Rab-7a OS=Mus musculus GN=Rab7a PE=1 SV=2 - [RAB7A_MOUSE]	12	23.4748	663.42	68.6	1.02115	1.07941	1.07344	0.973989	0.95985	0.974356
403	O54983	Ketimine reductase mu-crystallin OS=Mus musculus GN=Crym PE=1 SV=1 - [CRYM_MOUSE]	12	33.5021	648.969	41.85	1.07556	0.973748	0.871636	1.15999	1.10326	1.02407
404	Q91V41	Ras-related protein Rab-14 OS=Mus musculus GN=Rab14 PE=1 SV=3 - [RAB14_MOUSE]	12	23.8819	646.517	77.21	0.966698	1.04914	1.04181	1.0926	0.937502	0.95647
405	Q9DB05	Alpha-soluble NSF attachment protein OS=Mus musculus GN=Napa PE=1 SV=1 - [SNAA_MOUSE]	12	33.1682	630.008	62.37	1.0054	1.03161	1.03469	1.0851	0.949126	1.029
406	Q99LC5	Electron transfer flavoprotein subunit alpha, mitochondrial OS=Mus musculus GN=Etfa PE=1 SV=2 - [ETFA_MOUSE]	12	34.9875	565.719	48.35	1.05909	0.946706	0.98104	1.00664	1.03813	1.04278
407	Q8BVI4	Dihydropteridine reductase OS=Mus musculus GN=Qdpr PE=1 SV=2 - [DHPR_MOUSE]	12	25.5538	517.722	63.07	1.08022	1.04427	1.02552	0.923984	1.1083	1.1508
408	Q80SW1	S-adenosylhomocysteine hydrolase-like protein 1 OS=Mus musculus GN=Ahcyl1 PE=1 SV=1 - [SAHH2_MOUSE]	12	58.9134	494.474	44.34	0.954756	1.16724	1.06042	0.954376	0.967883	1.02035
409	P35700	Peroxiredoxin-1 OS=Mus musculus GN=Prdx1 PE=1 SV=1 - [PRDX1_MOUSE]	12	22.1624	483.547	60.8	1.1393	1.04937	0.953284	0.998934	1.01687	1.06642
410	Q9CR68	Cytochrome b-c1 complex subunit Rieske, mitochondrial OS=Mus musculus GN=Uqcrfs1 PE=1 SV=1 - [UCRI_MOUSE]	12	29.3492	480.243	41.61	0.969978	1.0211	1.15096	0.967134	1.03123	1.03769
411	Q8R366	Immunoglobulin superfamily member 8 OS=Mus musculus GN=Igsf8 PE=1 SV=2 - [IGSF8_MOUSE]	12	64.9703	464.987	25.53	0.906968	1.01515	0.964474	0.877363	1.01376	0.990638
412	P48774	Glutathione S-transferase Mu 5 OS=Mus musculus GN=Gstm5 PE=1 SV=1 - [GSTM5_MOUSE]	12	26.6172	451.377	61.16	0.942988	1.1321	1.14422	1.06174	0.948042	1.0038
413	Q91WC3	Long-chain-fatty-acid--CoA ligase 6 OS=Mus musculus GN=Acsl6 PE=1 SV=1 - [ACSL6_MOUSE]	12	77.9672	335.922	17.93	0.93579	1.04896	1.15593	0.951075	0.909256	1.02109
414	Q9CVB6	Actin-related protein 2/3 complex subunit 2 OS=Mus musculus GN=Arpc2 PE=1 SV=3 - [ARPC2_MOUSE]	12	34.3355	317.544	36	0.964924	1.06148	1.02558	1.10807	1.00934	0.952678
415	O35678	Monoglyceride lipase OS=Mus musculus GN=Mgll PE=1 SV=1 - [MGLL_MOUSE]	12	33.366	315.596	54.13	0.938544	1.00315	1.03378	1.00387	1.01941	1.00915
416	Q8R5H6	Wiskott-Aldrich syndrome protein family member 1 OS=Mus musculus GN=Wasf1 PE=1 SV=2 - [WASF1_MOUSE]	12	61.4708	277.441	28.44	0.948004	0.982218	0.940778	1.02356	0.968489	0.974264
417	Q6P9K9	Neurexin-3 OS=Mus musculus GN=Nrxn3 PE=1 SV=2 - [NRX3A_MOUSE]	12	173.318	254.512	10.5	0.915044	0.963677	0.96197	0.975892	0.975996	0.926522
418	Q5FWK3	Rho GTPase-activating protein 1 OS=Mus musculus GN=Arhgap1 PE=1 SV=1 - [RHG01_MOUSE]	12	50.3791	253.733	29.38	1.01705	0.961628	0.978324	0.996042	0.995906	0.977966
419	Q9QUM9	Proteasome subunit alpha type-6 OS=Mus musculus GN=Psma6 PE=1 SV=1 - [PSA6_MOUSE]	12	27.3548	250.277	55.69	1.06894	0.954724	1.03627	0.951831	1.06633	1.0828
420	Q8BUV3	Gephyrin OS=Mus musculus GN=Gphn PE=1 SV=2 - [GEPH_MOUSE]	12	83.2298	246.359	17.17	0.991512	1.02962	1.05941	0.956934	0.99803	1.06117
421	Q9JLB0	MAGUK p55 subfamily member 6 OS=Mus musculus GN=Mpp6 PE=1 SV=1 - [MPP6_MOUSE]	12	62.5915	245.031	24.95	1.03384	0.917626	0.97421	0.990393	0.978581	0.996491
422	P28738	Kinesin heavy chain isoform 5C OS=Mus musculus GN=Kif5c PE=1 SV=3 - [KIF5C_MOUSE]	12	109.207	242.018	22.38	1.02701	0.968194	0.964073	1.00777	0.991102	1.00487
423	Q99L47	Hsc70-interacting protein OS=Mus musculus GN=St13 PE=1 SV=1 - [F10A1_MOUSE]	12	41.6295	224.384	32.61	1.02971	0.999759	0.990843	1.02576	0.985504	1.04956
424	Q9D394	Protein RUFY3 OS=Mus musculus GN=Rufy3 PE=1 SV=1 - [RUFY3_MOUSE]	12	52.9732	217.557	28.57	1.03332	1.00493	0.971366	0.964634	1.03602	1.00833
425	P14869	60S acidic ribosomal protein P0 OS=Mus musculus GN=Rplp0 PE=1 SV=3 - [RLA0_MOUSE]	12	34.1948	210.74	35.02	0.927807	1.08507	1.10676	1.06332	0.969517	0.978015
426	P62334	26S proteasome regulatory subunit 10B OS=Mus musculus GN=Psmc6 PE=1 SV=1 - [PRS10_MOUSE]	12	44.1451	207.274	34.7	1.04166	1.00275	0.978411	1.00656	0.991344	1.0072
427	Q62443	Neuronal pentraxin-1 OS=Mus musculus GN=Nptx1 PE=1 SV=1 - [NPTX1_MOUSE]	12	47.0878	200.715	26.85	1.02649	0.970286	1.07936	0.996184	1.09541	0.984506
428	Q01097	Glutamate receptor ionotropic, NMDA 2B OS=Mus musculus GN=Grin2b PE=1 SV=3 - [NMDE2_MOUSE]	12	165.853	199.24	8.57	0.961629	0.992686	1.03708	1.00841	0.959161	0.972763
429	P26039	Talin-1 OS=Mus musculus GN=Tln1 PE=1 SV=2 - [TLN1_MOUSE]	12	269.653	198.647	9.17	0.955394	0.961108	0.947999	1.04948	0.990122	0.960916
430	O08585	Clathrin light chain A OS=Mus musculus GN=Clta PE=1 SV=2 - [CLCA_MOUSE]	12	25.5885	192.333	34.04	0.972522	1.02889	1.16802	1.03911	0.946057	0.981918
431	O88544	COP9 signalosome complex subunit 4 OS=Mus musculus GN=Cops4 PE=1 SV=1 - [CSN4_MOUSE]	12	46.2557	190.808	39.66	0.957661	0.99993	0.93425	1.02292	0.969394	0.97304
432	Q93092	Transaldolase OS=Mus musculus GN=Taldo1 PE=1 SV=2 - [TALDO_MOUSE]	12	37.3634	185.172	31.16	1.02931	1.08412	0.973307	0.988485	1.06494	1.0705
433	Q8BP47	Asparagine--tRNA ligase, cytoplasmic OS=Mus musculus GN=Nars PE=1 SV=2 - [SYNC_MOUSE]	12	64.238	181.538	22.36	0.987925	1.05006	1.03964	1.00997	0.977895	0.955491
434	Q91YQ5	Dolichyl-diphosphooligosaccharide--protein glycosyltransferase subunit 1 OS=Mus musculus GN=Rpn1 PE=1 SV=1 - [RPN1_MOUSE]	12	68.4857	174.829	21.88	0.929374	1.00802	1.00699	0.97415	0.990623	1.05555
435	Q9R0Q6	Actin-related protein 2/3 complex subunit 1A OS=Mus musculus GN=Arpc1a PE=1 SV=1 - [ARC1A_MOUSE]	12	41.5997	155.52	33.24	0.969231	1.10983	1.06899	1.10074	0.963453	0.972081
436	Q9JLV5	Cullin-3 OS=Mus musculus GN=Cul3 PE=1 SV=1 - [CUL3_MOUSE]	12	88.8914	151.956	17.19	1.05083	0.971369	0.938398	1.07993	0.956167	0.997717
437	P12970	60S ribosomal protein L7a OS=Mus musculus GN=Rpl7a PE=1 SV=2 - [RL7A_MOUSE]	12	29.958	150.338	45.11	1.04663	0.982949	1.05676	0.958732	1.0526	1.06002
438	P51660	Peroxisomal multifunctional enzyme type 2 OS=Mus musculus GN=Hsd17b4 PE=1 SV=3 - [DHB4_MOUSE]	12	79.432	146.872	18.91	1.01555	0.947962	0.954725	0.978372	1.005	1.02557
439	Q3UHB1	5'-nucleotidase domain-containing protein 3 OS=Mus musculus GN=Nt5dc3 PE=1 SV=1 - [NT5D3_MOUSE]	12	63.13	132.253	22.16	0.926847	0.980603	1.0477	1.05718	0.959115	0.998617
440	O70589	Peripheral plasma membrane protein CASK OS=Mus musculus GN=Cask PE=1 SV=2 - [CSKP_MOUSE]	12	105.042	131.276	12.85	1.00125	0.960936	0.997641	0.965051	0.995	0.959517
441	Q8BH04	Phosphoenolpyruvate carboxykinase [GTP], mitochondrial OS=Mus musculus GN=Pck2 PE=1 SV=1 - [PCKGM_MOUSE]	12	70.4825	128.313	21.88	1.15048	0.949962	0.954304	1.04815	0.971854	0.922721
442	P46471	26S proteasome regulatory subunit 7 OS=Mus musculus GN=Psmc2 PE=1 SV=5 - [PRS7_MOUSE]	12	48.6171	125.435	33.03	1.06061	0.987151	0.983902	1.00267	0.98973	1.00454
443	Q8BGH2	Sorting and assembly machinery component 50 homolog OS=Mus musculus GN=Samm50 PE=1 SV=1 - [SAM50_MOUSE]	12	51.8313	123.783	27.72	0.927924	1.02794	1.06063	1.0308	0.962126	0.943389
444	P33173	Kinesin-like protein KIF1A OS=Mus musculus GN=Kif1a PE=1 SV=2 - [KIF1A_MOUSE]	12	191.604	123.537	8.14	1.06983	0.98972	0.920346	1.02453	1.02518	1.00769
445	P14148	60S ribosomal protein L7 OS=Mus musculus GN=Rpl7 PE=1 SV=2 - [RL7_MOUSE]	12	31.3998	109.671	42.22	0.99558	1.08381	1.08591	1.02367	0.997296	1.01
446	Q91VR5	ATP-dependent RNA helicase DDX1 OS=Mus musculus GN=Ddx1 PE=1 SV=1 - [DDX1_MOUSE]	12	82.4478	106.721	17.97	1.01403	1.00551	1.01475	0.978801	1.00625	1.03425
447	Q8C419	Probable G-protein coupled receptor 158 OS=Mus musculus GN=Gpr158 PE=1 SV=2 - [GP158_MOUSE]	12	134.341	106.458	11.58	0.90203	0.970976	0.997093	0.897222	1.06045	1.01189
448	Q6NXK7	Inactive dipeptidyl peptidase 10 OS=Mus musculus GN=Dpp10 PE=1 SV=1 - [DPP10_MOUSE]	12	90.769	105.174	16.44	0.994688	0.960757	1.02762	0.875575	0.992396	1.01172
449	Q9QYB5	Gamma-adducin OS=Mus musculus GN=Add3 PE=1 SV=2 - [ADDG_MOUSE]	12	78.7277	88.1074	19.41	0.926386	1.09023	1.03415	0.996561	0.978428	0.969929
450	P60202	Myelin proteolipid protein OS=Mus musculus GN=Plp1 PE=1 SV=2 - [MYPR_MOUSE]	11	30.0571	2279.17	35.38	0.874267	1.10936	1.10089	0.662094	1.43209	1.43482
451	P51881	ADP/ATP translocase 2 OS=Mus musculus GN=Slc25a5 PE=1 SV=3 - [ADT2_MOUSE]	11	32.9102	1840.27	57.72	0.927794	1.02162	1.06137	0.960993	0.94742	0.973798
452	Q9D051	Pyruvate dehydrogenase E1 component subunit beta, mitochondrial OS=Mus musculus GN=Pdhb PE=1 SV=1 - [ODPB_MOUSE]	11	38.912	1450.23	39	0.975158	0.989338	1.02381	0.961715	0.969814	1.00553
453	Q60931	Voltage-dependent anion-selective channel protein 3 OS=Mus musculus GN=Vdac3 PE=1 SV=1 - [VDAC3_MOUSE]	11	30.7334	1407.3	46.64	1.04369	1.00718	1.06808	1.07026	0.936547	0.975213
454	P63328	Serine/threonine-protein phosphatase 2B catalytic subunit alpha isoform OS=Mus musculus GN=Ppp3ca PE=1 SV=1 - [PP2BA_MOUSE]	11	58.6063	979.629	35.89	0.983135	1.02321	0.991877	1.04827	1.00569	0.983103
455	Q9D2G2	Dihydrolipoyllysine-residue succinyltransferase component of 2-oxoglutarate dehydrogenase complex, mitochondrial OS=Mus musculus GN=Dlst PE=1 SV=1 - [ODO2_MOUSE]	11	48.9635	877.18	22.69	0.984878	0.984011	1.01139	0.899649	1.00423	1.01457
456	Q9WTT4	V-type proton ATPase subunit G 2 OS=Mus musculus GN=Atp6v1g2 PE=1 SV=1 - [VATG2_MOUSE]	11	13.643	737.404	78.81	1.03278	1.07272	1.03713	1.03645	1.05796	1.02175
457	P12367	cAMP-dependent protein kinase type II-alpha regulatory subunit OS=Mus musculus GN=Prkar2a PE=1 SV=2 - [KAP2_MOUSE]	11	45.3605	667.054	40.4	0.936233	1.00378	1.01411	0.952328	0.989777	1.00426
458	P63085	Mitogen-activated protein kinase 1 OS=Mus musculus GN=Mapk1 PE=1 SV=3 - [MK01_MOUSE]	11	41.2492	642.752	43.85	1.10783	1.00782	0.91128	1.0755	0.974578	1.0052
459	P12023	Amyloid-beta A4 protein OS=Mus musculus GN=App PE=1 SV=3 - [A4_MOUSE]	11	86.667	555.968	15.84	1.88704	1.08477	1.0066	1.83201	0.848929	0.916554
460	Q9WUM5	Succinate--CoA ligase [ADP/GDP-forming] subunit alpha, mitochondrial OS=Mus musculus GN=Suclg1 PE=1 SV=4 - [SUCA_MOUSE]	11	36.132	494.664	39.31	1.00637	1.01191	1.01618	1.01251	1.01803	1.05575
461	Q8BG05	Heterogeneous nuclear ribonucleoprotein A3 OS=Mus musculus GN=Hnrnpa3 PE=1 SV=1 - [ROA3_MOUSE]	11	39.6276	490.072	29.82	0.954208	1.07808	1.15361	0.978109	0.966577	1.02422
462	Q9DCW4	Electron transfer flavoprotein subunit beta OS=Mus musculus GN=Etfb PE=1 SV=3 - [ETFB_MOUSE]	11	27.606	456.608	47.45	1.08139	0.973877	1.00094	1.00942	1.06126	1.07917
463	Q8K0T0	Reticulon-1 OS=Mus musculus GN=Rtn1 PE=1 SV=1 - [RTN1_MOUSE]	11	83.5206	436.128	17.44	0.960476	1.0529	1.05175	0.94211	1.01047	0.988273
464	Q9CYT6	Adenylyl cyclase-associated protein 2 OS=Mus musculus GN=Cap2 PE=1 SV=1 - [CAP2_MOUSE]	11	52.8289	430.206	28.78	1.00599	1.00607	0.994286	1.00641	1.05624	0.986485
465	Q6IRU5	Clathrin light chain B OS=Mus musculus GN=Cltb PE=1 SV=1 - [CLCB_MOUSE]	11	25.1562	418.564	39.74	0.993266	1.02153	1.14138	1.00929	0.937612	1.00362
466	Q06890	Clusterin OS=Mus musculus GN=Clu PE=1 SV=1 - [CLUS_MOUSE]	11	51.6226	413.119	26.34	1.54075	1.17313	0.934656	1.29983	0.907497	0.945847
467	Q99PJ0	Neurotrimin OS=Mus musculus GN=Ntm PE=1 SV=2 - [NTRI_MOUSE]	11	37.9605	411.76	37.79	0.91436	1.15529	1.22834	0.953474	0.947678	0.956317
468	P18242	Cathepsin D OS=Mus musculus GN=Ctsd PE=1 SV=1 - [CATD_MOUSE]	11	44.925	373.6	31.22	1.14705	1.09697	1.01989	1.03161	1.00387	1.04913
469	Q9CWS0	N(G),N(G)-dimethylarginine dimethylaminohydrolase 1 OS=Mus musculus GN=Ddah1 PE=1 SV=3 - [DDAH1_MOUSE]	11	31.3609	354.175	55.09	1.16263	1.05202	0.938307	1.12619	0.954461	1.00575
470	Q8C0M9	Isoaspartyl peptidase/L-asparaginase OS=Mus musculus GN=Asrgl1 PE=1 SV=1 - [ASGL1_MOUSE]	11	33.9284	315.353	40.18	1.06799	0.99488	0.905557	1.03827	0.97129	0.978642
471	Q80XN0	D-beta-hydroxybutyrate dehydrogenase, mitochondrial OS=Mus musculus GN=Bdh1 PE=1 SV=2 - [BDH_MOUSE]	11	38.2744	314.566	35.86	0.975538	1.07528	1.18547	0.974904	0.925087	0.961829
472	Q8BMF3	NADP-dependent malic enzyme, mitochondrial OS=Mus musculus GN=Me3 PE=1 SV=2 - [MAON_MOUSE]	11	67.0556	283.555	20.7	1.07646	0.970393	0.601084	1.06821	0.806676	0.93988
473	Q9JIS5	Synaptic vesicle glycoprotein 2A OS=Mus musculus GN=Sv2a PE=1 SV=1 - [SV2A_MOUSE]	11	82.5939	277.342	14.15	1.019	0.95551	1.06315	1.01118	0.993715	0.942689
474	Q60902	Epidermal growth factor receptor substrate 15-like 1 OS=Mus musculus GN=Eps15l1 PE=1 SV=3 - [EP15R_MOUSE]	11	99.2475	277.119	14.11	0.983037	0.966898	1.0531	0.960521	1.06322	0.951687
475	P42208	Septin-2 OS=Mus musculus GN=Sept2 PE=1 SV=2 - [SEPT2_MOUSE]	11	41.4993	270.684	40.72	1.11597	0.981517	0.939706	1.08995	0.953921	0.958044
476	Q8CC35	Synaptopodin OS=Mus musculus GN=Synpo PE=1 SV=2 - [SYNPO_MOUSE]	11	99.4904	260.549	14.42	0.96274	0.998331	1.058	1.05372	0.916575	0.932226
477	Q9D1A2	Cytosolic non-specific dipeptidase OS=Mus musculus GN=Cndp2 PE=1 SV=1 - [CNDP2_MOUSE]	11	52.7336	249.63	31.16	1.08946	0.985093	0.940142	1.03224	1.04887	1.03912
478	Q9D8Y0	EF-hand domain-containing protein D2 OS=Mus musculus GN=Efhd2 PE=1 SV=1 - [EFHD2_MOUSE]	11	26.7746	246.51	46.67	1.03692	1.04986	1.07281	0.984114	0.956682	1.00154
479	P25444	40S ribosomal protein S2 OS=Mus musculus GN=Rps2 PE=1 SV=3 - [RS2_MOUSE]	11	31.2117	239.077	35.84	0.990068	0.97699	1.06146	0.970038	0.957205	1.07451
480	Q8CBE3	WD repeat-containing protein 37 OS=Mus musculus GN=Wdr37 PE=1 SV=1 - [WDR37_MOUSE]	11	55.0118	238.918	22.98	1.02673	0.927872	0.925915	0.964201	1.01126	0.971697
481	Q9DC07	LIM zinc-binding domain-containing Nebulette OS=Mus musculus GN=Nebl PE=1 SV=1 - [LNEBL_MOUSE]	11	31.0931	234.405	47.04	1.05836	0.896497	1.05109	0.974409	1.08251	1.02711
482	O88712	C-terminal-binding protein 1 OS=Mus musculus GN=Ctbp1 PE=1 SV=2 - [CTBP1_MOUSE]	11	47.7145	234.214	22	0.972183	1.1033	1.11177	1.01538	0.975071	0.998432
483	Q9R0P5	Destrin OS=Mus musculus GN=Dstn PE=1 SV=3 - [DEST_MOUSE]	11	18.5095	231.062	77.58	1.06586	1.02494	1.09712	0.928619	1.02573	1.08458
484	Q8K596	Sodium/calcium exchanger 2 OS=Mus musculus GN=Slc8a2 PE=1 SV=1 - [NAC2_MOUSE]	11	100.647	226.856	13.68	0.96713	0.998224	1.03233	0.970696	0.997408	0.96954
485	Q99MN9	Propionyl-CoA carboxylase beta chain, mitochondrial OS=Mus musculus GN=Pccb PE=1 SV=2 - [PCCB_MOUSE]	11	58.3719	220.92	26.43	1.04495	0.937999	0.920851	0.974535	1.09603	0.989038
486	Q3ULJ0	Glycerol-3-phosphate dehydrogenase 1-like protein OS=Mus musculus GN=Gpd1l PE=1 SV=2 - [GPD1L_MOUSE]	11	38.2009	219.766	39.89	1.06424	1.0674	0.958078	1.00627	0.970891	0.979309
487	Q80UG5	Septin-9 OS=Mus musculus GN=Sept9 PE=1 SV=1 - [SEPT9_MOUSE]	11	65.5339	219.292	19.55	1.03229	0.928029	1.04071	0.957886	0.979358	0.981738
488	Q9WV69	Dematin OS=Mus musculus GN=Dmtn PE=1 SV=1 - [DEMA_MOUSE]	11	45.4402	214.791	30.12	0.938123	1.06533	1.00968	0.987229	1.04346	1.04815
489	P62482	Voltage-gated potassium channel subunit beta-2 OS=Mus musculus GN=Kcnab2 PE=1 SV=1 - [KCAB2_MOUSE]	11	40.995	211.728	30.25	1.00556	1.03025	1.13157	0.995235	0.99701	1.01598
490	Q8R081	Heterogeneous nuclear ribonucleoprotein L OS=Mus musculus GN=Hnrnpl PE=1 SV=2 - [HNRPL_MOUSE]	11	63.9233	206.36	21.84	0.93936	1.0629	1.13701	0.959603	0.913819	1.04526
491	Q60676	Serine/threonine-protein phosphatase 5 OS=Mus musculus GN=Ppp5c PE=1 SV=3 - [PPP5_MOUSE]	11	56.8402	204.021	22.04	1.09496	0.924342	1.02949	1.04579	0.996661	1.02471
492	Q8BJY1	26S proteasome non-ATPase regulatory subunit 5 OS=Mus musculus GN=Psmd5 PE=1 SV=4 - [PSMD5_MOUSE]	11	55.9369	203.781	25.2	1.01603	0.905415	0.866159	0.955156	1.05227	1.07121
493	Q8R1Q8	Cytoplasmic dynein 1 light intermediate chain 1 OS=Mus musculus GN=Dync1li1 PE=1 SV=1 - [DC1L1_MOUSE]	11	56.5791	194.899	25.05	0.997242	1.01355	1.04328	0.940774	1.02629	1.03057
494	P20060	Beta-hexosaminidase subunit beta OS=Mus musculus GN=Hexb PE=1 SV=2 - [HEXB_MOUSE]	11	61.0771	192.802	21.46	1.26178	1.0281	1.01672	1.1372	0.965921	1.03866
495	Q8BW96	Calcium/calmodulin-dependent protein kinase type 1D OS=Mus musculus GN=Camk1d PE=1 SV=2 - [KCC1D_MOUSE]	11	42.8917	187.03	31.95	1.06005	1.03945	0.948364	1.03039	1.04085	1.01759
496	Q8CGC7	Bifunctional glutamate/proline--tRNA ligase OS=Mus musculus GN=Eprs PE=1 SV=4 - [SYEP_MOUSE]	11	169.972	176.255	9.92	1.03973	1.02694	0.898587	1.1433	0.926474	0.881419
497	Q9Z204	Heterogeneous nuclear ribonucleoproteins C1/C2 OS=Mus musculus GN=Hnrnpc PE=1 SV=1 - [HNRPC_MOUSE]	11	34.3639	165.848	32.91	0.965959	1.01153	1.07035	0.928185	1.06499	1.10666
498	Q60631	Growth factor receptor-bound protein 2 OS=Mus musculus GN=Grb2 PE=1 SV=1 - [GRB2_MOUSE]	11	25.2224	157.439	52.53	1.06333	0.971675	0.967958	0.946477	0.987624	1.07328
499	P45376	Aldose reductase OS=Mus musculus GN=Akr1b1 PE=1 SV=3 - [ALDR_MOUSE]	11	35.7095	156.022	33.23	1.10049	0.93505	0.885883	1.05297	1.0209	0.99301
500	O88685	26S proteasome regulatory subunit 6A OS=Mus musculus GN=Psmc3 PE=1 SV=2 - [PRS6A_MOUSE]	11	49.5176	153.033	32.13	1.02809	1.12686	0.976612	0.962384	1.03349	1.00516
501	Q925I1	ATPase family AAA domain-containing protein 3 OS=Mus musculus GN=Atad3 PE=1 SV=1 - [ATAD3_MOUSE]	11	66.7006	152.941	19.12	1.00919	0.919072	0.927109	1.04708	0.965777	0.936199
502	P26040	Ezrin OS=Mus musculus GN=Ezr PE=1 SV=3 - [EZRI_MOUSE]	11	69.3636	152.133	25.77	1.03333	0.999367	1.04212	0.957554	1.03453	1.03407
503	P14733	Lamin-B1 OS=Mus musculus GN=Lmnb1 PE=1 SV=3 - [LMNB1_MOUSE]	11	66.7448	144.119	24.32	0.968857	1.0504	1.07191	0.948148	0.993213	1.07616
504	P62908	40S ribosomal protein S3 OS=Mus musculus GN=Rps3 PE=1 SV=1 - [RS3_MOUSE]	11	26.6574	143.508	44.03	0.966956	1.08829	1.09871	1.02963	0.958769	1.0062
505	Q3V3R1	Monofunctional C1-tetrahydrofolate synthase, mitochondrial OS=Mus musculus GN=Mthfd1l PE=1 SV=2 - [C1TM_MOUSE]	11	105.662	135.931	14.12	1.00929	1.03022	0.993305	1.05038	0.940047	0.907144
506	Q78PY7	Staphylococcal nuclease domain-containing protein 1 OS=Mus musculus GN=Snd1 PE=1 SV=1 - [SND1_MOUSE]	11	102.025	135.15	13.41	1.0274	0.99993	0.962534	1.0594	0.984026	1.04377
507	Q9R1P4	Proteasome subunit alpha type-1 OS=Mus musculus GN=Psma1 PE=1 SV=1 - [PSA1_MOUSE]	11	29.5278	122.161	41.44	1.04587	0.964298	0.993176	0.974651	1.01426	1.06549
508	P24527	Leukotriene A-4 hydrolase OS=Mus musculus GN=Lta4h PE=1 SV=4 - [LKHA4_MOUSE]	11	69.0071	116.593	20.62	1.01461	1.05575	0.968997	0.983763	1.05705	1.03337
509	Q9CZD3	Glycine--tRNA ligase OS=Mus musculus GN=Gars PE=1 SV=1 - [GARS_MOUSE]	11	81.8257	111.487	15.91	0.937662	0.984358	0.920127	1.0206	1.09048	1.05928
510	Q5SYD0	Unconventional myosin-Id OS=Mus musculus GN=Myo1d PE=1 SV=1 - [MYO1D_MOUSE]	11	116.007	110.25	10.74	0.910929	0.997018	1.01638	0.792593	1.15979	1.16992
511	Q9Z1Z2	Serine-threonine kinase receptor-associated protein OS=Mus musculus GN=Strap PE=1 SV=2 - [STRAP_MOUSE]	11	38.418	108.39	39.43	1.00672	0.986416	0.971498	0.998434	0.995231	1.03905
512	P62270	40S ribosomal protein S18 OS=Mus musculus GN=Rps18 PE=1 SV=3 - [RS18_MOUSE]	11	17.7079	108.313	51.97	0.975675	0.912015	0.993699	0.949289	1.04592	1.05537
513	Q9CPW0	Contactin-associated protein-like 2 OS=Mus musculus GN=Cntnap2 PE=1 SV=2 - [CNTP2_MOUSE]	11	148.103	89.7474	9.23	0.90092	1.03834	1.16776	0.993444	0.956221	0.988173
514	P08003	Protein disulfide-isomerase A4 OS=Mus musculus GN=Pdia4 PE=1 SV=3 - [PDIA4_MOUSE]	11	71.9375	86.4902	20.22	1.0484	0.978739	0.947379	1.04333	1.08005	1.04168
515	Q922D8	C-1-tetrahydrofolate synthase, cytoplasmic OS=Mus musculus GN=Mthfd1 PE=1 SV=4 - [C1TC_MOUSE]	11	101.136	76.9176	14.33	1.01642	1.03946	1.02434	1.04079	1.04261	1.0839
516	Q9Z2D6	Methyl-CpG-binding protein 2 OS=Mus musculus GN=Mecp2 PE=1 SV=1 - [MECP2_MOUSE]	11	52.2755	72.3125	25.83	0.984666	1.00964	1.06326	1.00392	0.97326	1.03017
517	O55023	Inositol monophosphatase 1 OS=Mus musculus GN=Impa1 PE=1 SV=1 - [IMPA1_MOUSE]	11	30.4162	71.902	38.63	0.947597	1.06445	0.987228	1.07316	1.04249	1.01185
518	Q3UPL0	Protein transport protein Sec31A OS=Mus musculus GN=Sec31a PE=1 SV=2 - [SC31A_MOUSE]	11	133.486	67.899	11.71	1.00008	1.04027	1.06309	1.01851	0.932712	0.950834
519	Q00493	Carboxypeptidase E OS=Mus musculus GN=Cpe PE=1 SV=2 - [CBPE_MOUSE]	11	53.2223	60.3769	22.06	1.05426	1.04172	0.946039	1.00242	1.00538	0.952002
520	A2AQ25	Sickle tail protein OS=Mus musculus GN=Skt PE=1 SV=1 - [SKT_MOUSE]	11	212.905	36.0675	6.22	1.01461	0.953635	1.04332	1.02852	0.969854	0.970106
521	Q9DBJ1	Phosphoglycerate mutase 1 OS=Mus musculus GN=Pgam1 PE=1 SV=3 - [PGAM1_MOUSE]	10	28.8139	1220.97	64.96	1.09736	0.973487	0.95205	1.04935	1.02529	1.0683
522	Q6PHZ2	Calcium/calmodulin-dependent protein kinase type II subunit delta OS=Mus musculus GN=Camk2d PE=1 SV=1 - [KCC2D_MOUSE]	10	56.3336	1024.09	39.28	0.956128	1.02321	0.977058	0.836118	0.952199	1.04088
523	O35526	Syntaxin-1A OS=Mus musculus GN=Stx1a PE=1 SV=3 - [STX1A_MOUSE]	10	33.0337	869.332	43.06	0.882381	1.16486	1.16898	0.813046	0.949349	1.00996
524	P19783	Cytochrome c oxidase subunit 4 isoform 1, mitochondrial OS=Mus musculus GN=Cox4i1 PE=1 SV=2 - [COX41_MOUSE]	10	19.5179	813.686	49.7	0.921364	1.0088	1.10593	1.01431	0.984863	1.01989
525	P08228	Superoxide dismutase [Cu-Zn] OS=Mus musculus GN=Sod1 PE=1 SV=2 - [SODC_MOUSE]	10	15.9328	757.314	62.99	1.2517	0.923053	0.857612	1.10542	1.05023	1.03683
526	Q91V12	Cytosolic acyl coenzyme A thioester hydrolase OS=Mus musculus GN=Acot7 PE=1 SV=2 - [BACH_MOUSE]	10	42.5097	675.731	28.61	1.08344	0.966633	0.883822	1.00941	1.03334	1.01718
527	P10126	Elongation factor 1-alpha 1 OS=Mus musculus GN=Eef1a1 PE=1 SV=3 - [EF1A1_MOUSE]	10	50.0821	626.069	42.64	1.03891	1.13135	1.01662	1.06016	0.985053	1.01406
528	Q99JY9	Actin-related protein 3 OS=Mus musculus GN=Actr3 PE=1 SV=3 - [ARP3_MOUSE]	10	47.327	619.043	39	1.01692	1.03699	0.999763	1.07966	0.971935	0.96336
529	Q61171	Peroxiredoxin-2 OS=Mus musculus GN=Prdx2 PE=1 SV=3 - [PRDX2_MOUSE]	10	21.7651	592.965	45.45	1.13766	0.991712	0.961632	1.10364	0.980057	0.979876
530	Q99JR1	Sideroflexin-1 OS=Mus musculus GN=Sfxn1 PE=1 SV=3 - [SFXN1_MOUSE]	10	35.6263	544.049	40.37	0.947474	1.05148	0.944302	0.974122	0.980474	0.966944
531	Q9DCX2	ATP synthase subunit d, mitochondrial OS=Mus musculus GN=Atp5h PE=1 SV=3 - [ATP5H_MOUSE]	10	18.7376	526.365	71.43	0.987619	1.04493	1.18084	1.02568	0.986959	1.06771
532	Q9R1T4	Septin-6 OS=Mus musculus GN=Sept6 PE=1 SV=4 - [SEPT6_MOUSE]	10	49.5882	523.172	41.47	1.02778	1.07725	1.17396	1.0395	0.89415	0.975354
533	Q8CHH9	Septin-8 OS=Mus musculus GN=Sept8 PE=1 SV=4 - [SEPT8_MOUSE]	10	49.7812	466.192	34.97	0.984229	0.974907	1.02682	0.96975	1.02523	1.01735
534	P97797	Tyrosine-protein phosphatase non-receptor type substrate 1 OS=Mus musculus GN=Sirpa PE=1 SV=1 - [SHPS1_MOUSE]	10	56.3897	439.408	18.91	0.938433	0.893333	1.04036	0.945737	0.994124	0.959779
535	Q921M7	Protein FAM49B OS=Mus musculus GN=Fam49b PE=1 SV=1 - [FA49B_MOUSE]	10	36.7527	426.602	44.44	1.03649	1.01694	0.999042	1.06628	1.02128	0.987932
536	Q9DCS9	NADH dehydrogenase [ubiquinone] 1 beta subcomplex subunit 10 OS=Mus musculus GN=Ndufb10 PE=1 SV=3 - [NDUBA_MOUSE]	10	21.0104	401.636	65.91	0.96179	0.984756	1.11945	0.987845	1.01637	1.02641
537	Q8BKZ9	Pyruvate dehydrogenase protein X component, mitochondrial OS=Mus musculus GN=Pdhx PE=1 SV=1 - [ODPX_MOUSE]	10	53.9652	390.345	18.76	1.00447	0.979785	1.04936	0.975073	0.971351	1.01313
538	P20444	Protein kinase C alpha type OS=Mus musculus GN=Prkca PE=1 SV=3 - [KPCA_MOUSE]	10	76.8021	381.48	34.82	1.04106	0.929521	1.02695	0.982574	1.10773	1.02285
539	Q9QUP5	Hyaluronan and proteoglycan link protein 1 OS=Mus musculus GN=Hapln1 PE=1 SV=1 - [HPLN1_MOUSE]	10	40.4522	355.938	33.99	0.945277	0.992223	1.08792	1.03372	0.976891	1.05489
540	Q8BWT1	3-ketoacyl-CoA thiolase, mitochondrial OS=Mus musculus GN=Acaa2 PE=1 SV=3 - [THIM_MOUSE]	10	41.8034	355.919	31.99	1.06644	1.00317	0.938531	0.95101	1.05867	1.15061
541	Q0VE82	Copine-7 OS=Mus musculus GN=Cpne7 PE=1 SV=1 - [CPNE7_MOUSE]	10	61.8519	352.28	22.98	0.939156	1.09628	0.898525	1.22182	1.00451	1.00243
542	Q60668	Heterogeneous nuclear ribonucleoprotein D0 OS=Mus musculus GN=Hnrnpd PE=1 SV=2 - [HNRPD_MOUSE]	10	38.3303	344.888	28.17	1.04573	1.10277	1.12004	0.987823	0.945059	1.04719
543	Q8K0S0	Phytanoyl-CoA hydroxylase-interacting protein OS=Mus musculus GN=Phyhip PE=1 SV=1 - [PHYIP_MOUSE]	10	37.5305	332.596	37.27	1.0077	1.07516	1.09518	1.09644	0.995288	0.978599
544	P47754	F-actin-capping protein subunit alpha-2 OS=Mus musculus GN=Capza2 PE=1 SV=3 - [CAZA2_MOUSE]	10	32.9466	318.634	50.7	1.05847	0.984557	0.992893	1.00187	1.0097	0.97096
545	Q9R0Y5	Adenylate kinase isoenzyme 1 OS=Mus musculus GN=Ak1 PE=1 SV=1 - [KAD1_MOUSE]	10	21.5261	315.115	53.09	1.02996	1.12566	1.00188	1.0072	1.0074	1.09891
546	Q9R0P9	Ubiquitin carboxyl-terminal hydrolase isozyme L1 OS=Mus musculus GN=Uchl1 PE=1 SV=1 - [UCHL1_MOUSE]	10	24.8224	301.447	47.53	1.12	0.884361	1.01141	1.14813	0.991694	1.11661
547	Q9Z1P6	NADH dehydrogenase [ubiquinone] 1 alpha subcomplex subunit 7 OS=Mus musculus GN=Ndufa7 PE=1 SV=3 - [NDUA7_MOUSE]	10	12.5676	296.329	75.22	1.01062	0.997623	1.08165	0.952054	0.969182	1.00559
548	Q62059	Versican core protein OS=Mus musculus GN=Vcan PE=1 SV=2 - [CSPG2_MOUSE]	10	366.56	287.602	3.07	0.903488	1.14275	1.09124	0.842464	1.10182	1.11822
549	P31786	Acyl-CoA-binding protein OS=Mus musculus GN=Dbi PE=1 SV=2 - [ACBP_MOUSE]	10	9.99414	275.34	75.86	1.25081	1.03036	0.889191	1.11272	1.13436	0.916125
550	Q9JJK2	LanC-like protein 2 OS=Mus musculus GN=Lancl2 PE=1 SV=1 - [LANC2_MOUSE]	10	50.7445	253.56	28.44	0.903174	1.222	1.13956	0.99112	1.03068	0.9906
551	Q07076	Annexin A7 OS=Mus musculus GN=Anxa7 PE=1 SV=2 - [ANXA7_MOUSE]	10	49.8933	248.802	22.89	1.07779	1.04453	0.982956	0.982308	1.04117	0.969455
552	Q99PT1	Rho GDP-dissociation inhibitor 1 OS=Mus musculus GN=Arhgdia PE=1 SV=3 - [GDIR1_MOUSE]	10	23.3928	246.545	43.14	1.06416	1.0579	0.943912	0.981301	1.0603	1.10731
553	Q925N0	Sideroflexin-5 OS=Mus musculus GN=Sfxn5 PE=1 SV=2 - [SFXN5_MOUSE]	10	37.3049	228.39	39.47	0.955002	1.03034	1.01315	1.01682	0.905195	0.969444
554	Q8BNW9	Kelch repeat and BTB domain-containing protein 11 OS=Mus musculus GN=Kbtbd11 PE=1 SV=3 - [KBTBB_MOUSE]	10	67.9036	226.488	23.85	0.953362	0.974981	1.00361	0.97408	1.02572	0.940635
555	P14231	Sodium/potassium-transporting ATPase subunit beta-2 OS=Mus musculus GN=Atp1b2 PE=1 SV=2 - [AT1B2_MOUSE]	10	33.3225	220.548	32.76	0.910743	1.21461	1.18349	0.891856	0.961528	1.01756
556	P14211	Calreticulin OS=Mus musculus GN=Calr PE=1 SV=1 - [CALR_MOUSE]	10	47.9649	202.755	19.47	1.08005	1.02924	0.999702	1.03507	1.0298	1.00984
557	Q9CZ30	Obg-like ATPase 1 OS=Mus musculus GN=Ola1 PE=1 SV=1 - [OLA1_MOUSE]	10	44.7013	201.61	25	1.03236	0.966659	0.894137	0.987067	1.08651	1.01819
558	Q8VHH5	Arf-GAP with GTPase, ANK repeat and PH domain-containing protein 3 OS=Mus musculus GN=Agap3 PE=1 SV=1 - [AGAP3_MOUSE]	10	97.9045	198.492	14.62	1.02115	0.977947	0.954806	1.07992	0.972843	0.942011
559	Q9ESM3	Hyaluronan and proteoglycan link protein 2 OS=Mus musculus GN=Hapln2 PE=1 SV=1 - [HPLN2_MOUSE]	10	37.9012	194.832	31.38	0.945752	0.986128	0.951144	0.781165	1.15057	1.17164
560	P70404	Isocitrate dehydrogenase [NAD] subunit gamma 1, mitochondrial OS=Mus musculus GN=Idh3g PE=1 SV=1 - [IDHG1_MOUSE]	10	42.7582	191.82	24.68	1.07236	0.92375	1.1122	0.965555	0.975496	0.971008
561	O35136	Neural cell adhesion molecule 2 OS=Mus musculus GN=Ncam2 PE=1 SV=1 - [NCAM2_MOUSE]	10	93.1455	179.035	12.43	0.922553	1.04536	1.0144	1.01203	0.926615	0.922722
562	Q5SRX1	TOM1-like protein 2 OS=Mus musculus GN=Tom1l2 PE=1 SV=1 - [TM1L2_MOUSE]	10	55.6279	178.052	20.12	1.00224	0.962615	1.02204	0.973792	1.02446	0.97812
563	P36916	Guanine nucleotide-binding protein-like 1 OS=Mus musculus GN=Gnl1 PE=1 SV=4 - [GNL1_MOUSE]	10	68.7286	176.371	18.62	1.00863	0.966479	0.952042	0.967855	1.01457	1.00404
564	Q99LR1	Monoacylglycerol lipase ABHD12 OS=Mus musculus GN=Abhd12 PE=1 SV=2 - [ABD12_MOUSE]	10	45.2411	164.995	25.38	1.01464	1.05559	0.959504	0.923041	0.939882	0.97489
565	Q8VIJ6	Splicing factor, proline- and glutamine-rich OS=Mus musculus GN=Sfpq PE=1 SV=1 - [SFPQ_MOUSE]	10	75.3943	161.811	14.74	0.940725	1.10305	1.12218	0.948265	0.932705	1.04286
566	P50544	Very long-chain specific acyl-CoA dehydrogenase, mitochondrial OS=Mus musculus GN=Acadvl PE=1 SV=3 - [ACADV_MOUSE]	10	70.8307	150.514	19.36	1.04896	1.01307	1.0805	1.02588	0.937458	1.12449
567	O35954	Membrane-associated phosphatidylinositol transfer protein 1 OS=Mus musculus GN=Pitpnm1 PE=1 SV=1 - [PITM1_MOUSE]	10	134.855	148.881	11.18	0.916341	1.02812	1.04055	1.00452	0.939116	0.888425
568	O88343	Electrogenic sodium bicarbonate cotransporter 1 OS=Mus musculus GN=Slc4a4 PE=1 SV=2 - [S4A4_MOUSE]	10	121.406	148.401	9.55	0.874558	1.16017	1.11528	0.913395	1	1.0172
569	Q3U0V1	Far upstream element-binding protein 2 OS=Mus musculus GN=Khsrp PE=1 SV=2 - [FUBP2_MOUSE]	10	76.7277	138.482	18.18	1.01368	0.977337	0.996377	0.94861	1.00526	1.07943
570	Q920P5	Adenylate kinase isoenzyme 5 OS=Mus musculus GN=Ak5 PE=1 SV=2 - [KAD5_MOUSE]	10	63.283	136.68	21.17	1.09985	0.946604	0.935941	0.955301	1.04695	1.0154
571	Q8BH66	Atlastin-1 OS=Mus musculus GN=Atl1 PE=1 SV=1 - [ATLA1_MOUSE]	10	63.3373	134.608	22.4	0.905723	1.13208	1.19236	0.996514	0.984015	1.04738
572	P97492	Regulator of G-protein signaling 14 OS=Mus musculus GN=Rgs14 PE=1 SV=2 - [RGS14_MOUSE]	10	59.8097	117.423	18.83	1.02419	0.936491	0.915552	0.999068	1.05043	0.997509
573	P27659	60S ribosomal protein L3 OS=Mus musculus GN=Rpl3 PE=1 SV=3 - [RL3_MOUSE]	10	46.0808	116.083	18.86	0.985866	1.01193	1.04621	0.897054	0.982282	1.03764
574	Q6P1F6	Serine/threonine-protein phosphatase 2A 55 kDa regulatory subunit B alpha isoform OS=Mus musculus GN=Ppp2r2a PE=1 SV=1 - [2ABA_MOUSE]	10	51.6595	116.054	32.89	1.07571	0.91634	0.932481	0.979643	1.00776	1.0016
575	Q9EPW0	Type I inositol 3,4-bisphosphate 4-phosphatase OS=Mus musculus GN=Inpp4a PE=1 SV=1 - [INP4A_MOUSE]	10	105.472	113.652	12.46	0.998396	1.01648	0.927861	1.01123	0.933898	0.923093
576	Q8CAA7	Glucose 1,6-bisphosphate synthase OS=Mus musculus GN=Pgm2l1 PE=1 SV=1 - [PGM2L_MOUSE]	10	70.2343	111.932	16.1	0.930482	1.0702	1.06579	1.00077	1.0813	0.974158
577	Q8BW75	Amine oxidase [flavin-containing] B OS=Mus musculus GN=Maob PE=1 SV=4 - [AOFB_MOUSE]	10	58.5204	108.041	21.54	0.942985	1.04872	1.0522	1.03594	1.01175	0.956293
578	Q03137	Ephrin type-A receptor 4 OS=Mus musculus GN=Epha4 PE=1 SV=2 - [EPHA4_MOUSE]	10	109.744	107.22	16.43	1.06421	0.88013	0.941655	1.00176	0.965682	1.00049
579	Q9DCL9	Multifunctional protein ADE2 OS=Mus musculus GN=Paics PE=1 SV=4 - [PUR6_MOUSE]	10	46.9761	106.123	24.71	1.04881	0.970119	0.984254	0.969045	1.08557	1.00245
580	Q80VP1	Epsin-1 OS=Mus musculus GN=Epn1 PE=1 SV=3 - [EPN1_MOUSE]	10	60.1747	98.8868	16.35	0.990778	1.00075	1.04173	0.993958	1.02119	1.0189
581	Q62421	Endophilin-A3 OS=Mus musculus GN=Sh3gl3 PE=1 SV=1 - [SH3G3_MOUSE]	10	38.9098	95.0827	32.85	1.0265	0.925903	0.871207	1.00485	1.01019	0.950966
582	Q8CHG7	Rap guanine nucleotide exchange factor 2 OS=Mus musculus GN=Rapgef2 PE=1 SV=2 - [RPGF2_MOUSE]	10	166.311	94.9337	7.75	1.07302	0.990058	0.942542	1.06739	1.09169	0.950541
583	Q64516	Glycerol kinase OS=Mus musculus GN=Gk PE=1 SV=2 - [GLPK_MOUSE]	10	61.188	92.1692	18.07	0.980803	1.08247	1.19925	0.989829	0.996324	0.989391
584	A2AGT5	Cytoskeleton-associated protein 5 OS=Mus musculus GN=Ckap5 PE=1 SV=1 - [CKAP5_MOUSE]	10	225.492	90.4631	5.91	0.989372	1.0327	0.97469	1.00922	1.03726	1.05547
585	Q9D1G5	Leucine-rich repeat-containing protein 57 OS=Mus musculus GN=Lrrc57 PE=1 SV=1 - [LRC57_MOUSE]	10	26.7433	89.5288	44.35	0.96882	1.03305	1.0689	1.0186	0.980074	0.978521
586	P42859	Huntingtin OS=Mus musculus GN=Htt PE=1 SV=2 - [HD_MOUSE]	10	344.471	81.851	3.78	0.948021	1.02474	1.08005	0.992429	0.908248	1.00757
587	Q06138	Calcium-binding protein 39 OS=Mus musculus GN=Cab39 PE=1 SV=2 - [CAB39_MOUSE]	10	39.8177	79.619	25.81	1.00778	0.980805	1.02294	1.00006	1.01411	1.06439
588	Q8CA95	cAMP and cAMP-inhibited cGMP 3',5'-cyclic phosphodiesterase 10A OS=Mus musculus GN=Pde10a PE=1 SV=2 - [PDE10_MOUSE]	10	89.35	78.1071	14.94	0.941364	0.882883	0.735016	0.968039	0.985853	0.925982
589	Q9QUR6	Prolyl endopeptidase OS=Mus musculus GN=Prep PE=1 SV=1 - [PPCE_MOUSE]	10	80.6999	74.1359	16.2	0.987576	0.980489	0.915235	1.02797	1.07112	1.03446
590	Q91W50	Cold shock domain-containing protein E1 OS=Mus musculus GN=Csde1 PE=1 SV=1 - [CSDE1_MOUSE]	10	88.7348	70.8591	12.91	0.937556	0.938508	0.99898	0.876345	1.02368	1.01815
591	Q9WVJ2	26S proteasome non-ATPase regulatory subunit 13 OS=Mus musculus GN=Psmd13 PE=1 SV=1 - [PSD13_MOUSE]	10	42.7821	66.6619	28.19	0.97595	1.13765	1.06497	1.05302	0.99638	1.00209
592	Q9EPU0	Regulator of nonsense transcripts 1 OS=Mus musculus GN=Upf1 PE=1 SV=2 - [RENT1_MOUSE]	10	123.889	65.7028	10.59	0.960006	1.06261	1.06388	1.01945	0.951184	0.987223
593	Q6ZPQ6	Membrane-associated phosphatidylinositol transfer protein 2 OS=Mus musculus GN=Pitpnm2 PE=1 SV=2 - [PITM2_MOUSE]	10	147.942	60.6215	9.14	0.951499	1.02934	1.08494	0.973417	1.01512	0.973351
594	Q6ZWN5	40S ribosomal protein S9 OS=Mus musculus GN=Rps9 PE=1 SV=3 - [RS9_MOUSE]	10	22.5776	59.8521	38.14	0.951757	1.04183	1.11117	1.0503	0.977998	1.00632
595	P04370	Myelin basic protein OS=Mus musculus GN=Mbp PE=1 SV=2 - [MBP_MOUSE]	9	27.1514	4075.47	26.4	1.07532	0.845909	0.881169	0.84949	1.48556	1.30963
596	Q8C1B7	Septin-11 OS=Mus musculus GN=Sept11 PE=1 SV=4 - [SEP11_MOUSE]	9	49.6633	767.289	39.91	1.05725	1.00766	1.00027	0.929802	0.996387	0.966143
597	P62962	Profilin-1 OS=Mus musculus GN=Pfn1 PE=1 SV=2 - [PROF1_MOUSE]	9	14.9475	766.756	63.57	1.12534	0.923643	0.92012	0.981429	1.1022	1.05931
598	P31324	cAMP-dependent protein kinase type II-beta regulatory subunit OS=Mus musculus GN=Prkar2b PE=1 SV=3 - [KAP3_MOUSE]	9	46.138	680.329	37.26	1.00655	1.02849	0.943988	0.953455	1.00012	1.06267
599	Q8BG39	Synaptic vesicle glycoprotein 2B OS=Mus musculus GN=Sv2b PE=1 SV=1 - [SV2B_MOUSE]	9	77.4061	615.718	14.64	0.90321	1.10055	1.18894	1.02037	0.929499	0.867428
600	P62631	Elongation factor 1-alpha 2 OS=Mus musculus GN=Eef1a2 PE=1 SV=1 - [EF1A2_MOUSE]	9	50.4223	594.713	36.72	1.01463	1.11088	1.05392	1.03414	0.922695	0.971944
601	P20917	Myelin-associated glycoprotein OS=Mus musculus GN=Mag PE=1 SV=2 - [MAG_MOUSE]	9	69.2158	575.677	19.17	0.912833	1.00596	0.959157	0.781207	1.38867	1.3715
602	P21279	Guanine nucleotide-binding protein G(q) subunit alpha OS=Mus musculus GN=Gnaq PE=1 SV=4 - [GNAQ_MOUSE]	9	42.1313	513.177	37.6	0.961316	1.09032	1.02212	0.951677	0.996356	0.990611
603	P35802	Neuronal membrane glycoprotein M6-a OS=Mus musculus GN=Gpm6a PE=1 SV=1 - [GPM6A_MOUSE]	9	31.1284	483.512	22.66	0.834518	1.20738	1.36394	0.929762	0.918275	0.966623
604	P68404	Protein kinase C beta type OS=Mus musculus GN=Prkcb PE=1 SV=4 - [KPCB_MOUSE]	9	76.701	443.124	33.08	0.928017	1.07361	1.0461	0.953315	0.972077	0.957857
605	Q64433	10 kDa heat shock protein, mitochondrial OS=Mus musculus GN=Hspe1 PE=1 SV=2 - [CH10_MOUSE]	9	10.9559	439.613	75.49	1.10779	0.929274	0.946025	1.06767	1.02045	1.01357
606	Q61207	Prosaposin OS=Mus musculus GN=Psap PE=1 SV=2 - [SAP_MOUSE]	9	61.3814	422.592	19.21	1.12688	1.0634	1.00376	1.03895	0.981788	1.07164
607	Q9Z1S5	Neuronal-specific septin-3 OS=Mus musculus GN=Sept3 PE=1 SV=2 - [SEPT3_MOUSE]	9	40.0126	394.748	24.57	1.04538	1.00961	1.12287	0.987193	0.96332	0.979977
608	P59999	Actin-related protein 2/3 complex subunit 4 OS=Mus musculus GN=Arpc4 PE=1 SV=3 - [ARPC4_MOUSE]	9	19.6543	394.453	54.17	0.94823	1.13822	1.05686	1.15614	0.995297	0.962148
609	Q9CZX8	40S ribosomal protein S19 OS=Mus musculus GN=Rps19 PE=1 SV=3 - [RS19_MOUSE]	9	16.0756	377.075	49.66	1.02227	1.01082	1.0744	0.958534	1.02982	1.08181
610	Q05816	Fatty acid-binding protein, epidermal OS=Mus musculus GN=Fabp5 PE=1 SV=3 - [FABP5_MOUSE]	9	15.1274	371.426	57.04	1.10866	1.08578	0.844417	1.13394	1.02588	1.0307
611	Q641P0	Actin-related protein 3B OS=Mus musculus GN=Actr3b PE=1 SV=1 - [ARP3B_MOUSE]	9	47.5492	370.825	33.01	1.00052	0.950912	0.942789	0.939532	0.993045	0.99601
612	Q7TMF3	NADH dehydrogenase [ubiquinone] 1 alpha subcomplex subunit 12 OS=Mus musculus GN=Ndufa12 PE=1 SV=2 - [NDUAC_MOUSE]	9	17.0756	349.032	64.83	0.95298	0.984836	1.06693	1.06587	0.962267	0.899846
613	Q62418	Drebrin-like protein OS=Mus musculus GN=Dbnl PE=1 SV=2 - [DBNL_MOUSE]	9	48.6696	341.349	31.19	1.07675	0.904785	0.928842	1.15746	0.995831	0.89659
614	O70443	Guanine nucleotide-binding protein G(z) subunit alpha OS=Mus musculus GN=Gnaz PE=1 SV=4 - [GNAZ_MOUSE]	9	40.8238	320.057	32.68	0.902465	0.982681	1.01271	0.919336	0.962033	0.978284
615	Q61792	LIM and SH3 domain protein 1 OS=Mus musculus GN=Lasp1 PE=1 SV=1 - [LASP1_MOUSE]	9	29.9753	312.664	31.94	1.07405	0.991907	1.00079	0.972986	0.986574	0.95352
616	P46638	Ras-related protein Rab-11B OS=Mus musculus GN=Rab11b PE=1 SV=3 - [RB11B_MOUSE]	9	24.4745	312.002	37.61	0.991343	1.05346	1.05384	1.01525	0.976964	0.966149
617	P42669	Transcriptional activator protein Pur-alpha OS=Mus musculus GN=Pura PE=1 SV=1 - [PURA_MOUSE]	9	34.8624	304.584	41.74	1.04053	1.11396	1.11166	0.949038	0.974123	1.0439
618	Q06185	ATP synthase subunit e, mitochondrial OS=Mus musculus GN=Atp5i PE=1 SV=2 - [ATP5I_MOUSE]	9	8.23047	303.646	85.92	0.997346	0.932869	1.20048	1.02442	1.02432	1.03432
619	O88643	Serine/threonine-protein kinase PAK 1 OS=Mus musculus GN=Pak1 PE=1 SV=1 - [PAK1_MOUSE]	9	60.6987	296.9	37.8	1.06175	1.01912	1.01248	0.943523	0.95035	1.0343
620	P51174	Long-chain specific acyl-CoA dehydrogenase, mitochondrial OS=Mus musculus GN=Acadl PE=1 SV=2 - [ACADL_MOUSE]	9	47.8775	292.929	22.56	1.11265	0.995524	0.912207	0.995676	1.10329	1.02163
621	P06837	Neuromodulin OS=Mus musculus GN=Gap43 PE=1 SV=1 - [NEUM_MOUSE]	9	23.6183	288.85	50.22	0.958505	1.13359	0.936935	0.949927	0.882636	1.00339
622	Q9WTP7	GTP:AMP phosphotransferase AK3, mitochondrial OS=Mus musculus GN=Ak3 PE=1 SV=3 - [KAD3_MOUSE]	9	25.4105	276.702	47.58	1.06598	0.985906	1.00462	0.994546	1.04526	1.01492
623	Q99020	Heterogeneous nuclear ribonucleoprotein A/B OS=Mus musculus GN=Hnrnpab PE=1 SV=1 - [ROAA_MOUSE]	9	30.8123	274.087	39.3	0.985383	1.04916	1.01351	0.949642	1.01389	1.06381
624	P47963	60S ribosomal protein L13 OS=Mus musculus GN=Rpl13 PE=1 SV=3 - [RL13_MOUSE]	9	24.2905	272.907	39.34	0.999225	0.954643	1.02827	1.00883	1.05123	1.02377
625	P46664	Adenylosuccinate synthetase isozyme 2 OS=Mus musculus GN=Adss PE=1 SV=2 - [PURA2_MOUSE]	9	49.9896	270.726	27.63	1.11171	1.0123	0.944384	0.995141	1.00306	1.04681
626	P61089	Ubiquitin-conjugating enzyme E2 N OS=Mus musculus GN=Ube2n PE=1 SV=1 - [UBE2N_MOUSE]	9	17.127	266.91	58.55	1.13129	0.963814	0.844136	1.04881	1.0881	0.976957
627	Q8K183	Pyridoxal kinase OS=Mus musculus GN=Pdxk PE=1 SV=1 - [PDXK_MOUSE]	9	34.9927	265.713	37.18	1.08194	0.926713	0.878439	1.15698	0.98922	1.05401
628	Q9Z2I0	Mitochondrial proton/calcium exchanger protein OS=Mus musculus GN=Letm1 PE=1 SV=1 - [LETM1_MOUSE]	9	82.9369	242.063	16.94	1.0017	1.09297	1.09311	0.968358	0.979289	1.0199
629	Q5EBJ4	Ermin OS=Mus musculus GN=Ermn PE=1 SV=1 - [ERMIN_MOUSE]	9	32.1284	233.871	37.72	0.996422	1.14263	0.97992	0.820431	1.26904	1.35056
630	Q8R164	Valacyclovir hydrolase OS=Mus musculus GN=Bphl PE=1 SV=1 - [BPHL_MOUSE]	9	32.8301	222.808	29.55	0.996411	1.05436	1.06541	1.04804	1.03778	1.08579
631	Q8BG32	26S proteasome non-ATPase regulatory subunit 11 OS=Mus musculus GN=Psmd11 PE=1 SV=3 - [PSD11_MOUSE]	9	47.407	220.753	22.75	0.979243	1.11918	1.07884	1.10963	0.970708	0.925829
632	Q9CR95	Adaptin ear-binding coat-associated protein 1 OS=Mus musculus GN=Necap1 PE=1 SV=2 - [NECP1_MOUSE]	9	29.6211	218.673	36.36	1.01492	1.03061	1.10469	1.0517	1.01878	0.937051
633	Q9D1K2	V-type proton ATPase subunit F OS=Mus musculus GN=Atp6v1f PE=1 SV=2 - [VATF_MOUSE]	9	13.362	210.689	62.18	1.01941	1.01222	0.992772	1.02643	1.07547	0.988635
634	P37040	NADPH--cytochrome P450 reductase OS=Mus musculus GN=Por PE=1 SV=2 - [NCPR_MOUSE]	9	76.9953	209.377	13.57	0.970089	0.973793	1.01229	0.978865	0.982992	0.988359
635	P47962	60S ribosomal protein L5 OS=Mus musculus GN=Rpl5 PE=1 SV=3 - [RL5_MOUSE]	9	34.3787	208.091	34.01	0.986274	1.00865	1.01749	1.01936	0.949926	1.00465
636	Q00PI9	Heterogeneous nuclear ribonucleoprotein U-like protein 2 OS=Mus musculus GN=Hnrnpul2 PE=1 SV=2 - [HNRL2_MOUSE]	9	84.8878	205.887	12.75	0.916053	1.05333	1.15212	0.911206	0.973726	0.988651
637	Q9DBE8	Alpha-1,3/1,6-mannosyltransferase ALG2 OS=Mus musculus GN=Alg2 PE=1 SV=2 - [ALG2_MOUSE]	9	47.3743	205.226	28.19	1.00082	1.07982	1.04088	1.03978	0.980603	0.980028
638	O35927	Catenin delta-2 OS=Mus musculus GN=Ctnnd2 PE=1 SV=1 - [CTND2_MOUSE]	9	134.916	204.399	10.59	1.02455	1.01468	1.08762	0.899381	1.04696	0.995239
639	P00493	Hypoxanthine-guanine phosphoribosyltransferase OS=Mus musculus GN=Hprt1 PE=1 SV=3 - [HPRT_MOUSE]	9	24.5546	201.118	48.17	1.05701	0.96508	0.903006	1.03821	0.97499	0.965491
640	Q9ESJ4	NCK-interacting protein with SH3 domain OS=Mus musculus GN=Nckipsd PE=1 SV=2 - [SPN90_MOUSE]	9	78.5225	200.605	13.87	1.08646	1.06212	0.898453	1.18996	1.00014	0.956122
641	Q64133	Amine oxidase [flavin-containing] A OS=Mus musculus GN=Maoa PE=1 SV=3 - [AOFA_MOUSE]	9	59.5637	197.867	22.81	0.959283	1.14311	1.04372	1.0071	0.993431	1.0067
642	P55012	Solute carrier family 12 member 2 OS=Mus musculus GN=Slc12a2 PE=1 SV=2 - [S12A2_MOUSE]	9	130.95	195.351	8.96	0.952471	0.953467	0.938726	0.884202	1.11484	1.10202
643	P50247	Adenosylhomocysteinase OS=Mus musculus GN=Ahcy PE=1 SV=3 - [SAHH_MOUSE]	9	47.6573	193.98	28.01	1.03252	0.980593	0.946991	1.08307	1.04068	0.998363
644	Q9CS84	Neurexin-1 OS=Mus musculus GN=Nrxn1 PE=1 SV=3 - [NRX1A_MOUSE]	9	166.063	181.97	8.19	0.997644	1.00751	1.06396	1.07443	0.923016	0.898845
645	Q99J85	Neuronal pentraxin receptor OS=Mus musculus GN=Nptxr PE=1 SV=1 - [NPTXR_MOUSE]	9	52.2517	181.833	19.68	1.05245	1.01371	0.972942	1.03694	1.00179	0.948706
646	Q80Z38	SH3 and multiple ankyrin repeat domains protein 2 OS=Mus musculus GN=Shank2 PE=1 SV=2 - [SHAN2_MOUSE]	9	158.871	180.292	6.64	0.95133	1.05867	1.07076	1.00236	0.979026	0.994245
647	P28474	Alcohol dehydrogenase class-3 OS=Mus musculus GN=Adh5 PE=1 SV=3 - [ADHX_MOUSE]	9	39.5221	170.749	26.74	1.01964	1.09744	1.07061	1.02117	0.996357	1.07001
648	Q9CYH2	Redox-regulatory protein FAM213A OS=Mus musculus GN=Fam213a PE=1 SV=2 - [F213A_MOUSE]	9	24.3789	168.398	34.86	0.966528	1.11372	1.12162	0.955444	1.04016	1.01881
649	Q9JM52	Misshapen-like kinase 1 OS=Mus musculus GN=Mink1 PE=1 SV=3 - [MINK1_MOUSE]	9	147.203	165.325	9.48	0.993761	0.916454	0.935893	0.968279	1.0435	0.989159
650	Q9DCD0	6-phosphogluconate dehydrogenase, decarboxylating OS=Mus musculus GN=Pgd PE=1 SV=3 - [6PGD_MOUSE]	9	53.2131	163.047	23.4	1.04368	1.05295	0.990034	1.02682	1.01252	1.0683
651	Q9Z0R4	Intersectin-1 OS=Mus musculus GN=Itsn1 PE=1 SV=2 - [ITSN1_MOUSE]	9	194.176	156.078	7.35	0.980333	1.03536	1.00867	0.98604	0.98405	0.949675
652	Q62465	Synaptic vesicle membrane protein VAT-1 homolog OS=Mus musculus GN=Vat1 PE=1 SV=3 - [VAT1_MOUSE]	9	43.069	155.566	26.11	0.998032	1.01197	0.854491	0.969748	0.985279	0.992114
653	P47809	Dual specificity mitogen-activated protein kinase kinase 4 OS=Mus musculus GN=Map2k4 PE=1 SV=2 - [MP2K4_MOUSE]	9	44.0853	151.897	28.21	0.964924	1.02058	1.05909	1.05698	1.01121	1.06024
654	Q61768	Kinesin-1 heavy chain OS=Mus musculus GN=Kif5b PE=1 SV=3 - [KINH_MOUSE]	9	109.484	149.548	17.86	0.973122	0.957465	0.99512	0.929782	0.936282	1.01517
655	P58389	Serine/threonine-protein phosphatase 2A activator OS=Mus musculus GN=Ptpa PE=1 SV=1 - [PTPA_MOUSE]	9	36.6867	148.962	29.41	1.05363	0.948319	1.01435	1.05865	1.04013	0.958448
656	Q99NE5	Regulating synaptic membrane exocytosis protein 1 OS=Mus musculus GN=Rims1 PE=1 SV=2 - [RIMS1_MOUSE]	9	163.061	148.865	7.31	0.944685	0.934934	1.03623	0.97338	1.02571	0.970162
657	E9Q6P5	Tetratricopeptide repeat protein 7B OS=Mus musculus GN=Ttc7b PE=1 SV=1 - [TTC7B_MOUSE]	9	94.1438	136.977	10.68	0.890984	0.984017	1.06316	1.02885	0.973713	0.952522
658	P16460	Argininosuccinate synthase OS=Mus musculus GN=Ass1 PE=1 SV=1 - [ASSY_MOUSE]	9	46.555	135.648	25.97	1.05135	1.02064	0.919385	1.01996	1.02002	1.02798
659	P41216	Long-chain-fatty-acid--CoA ligase 1 OS=Mus musculus GN=Acsl1 PE=1 SV=2 - [ACSL1_MOUSE]	9	77.9014	130.631	14.59	0.94725	1.00392	1.04825	0.938637	1.04167	0.97236
660	P62881	Guanine nucleotide-binding protein subunit beta-5 OS=Mus musculus GN=Gnb5 PE=1 SV=1 - [GNB5_MOUSE]	9	43.5369	130.387	22.78	0.841865	1.04939	1.13564	0.927164	0.973699	1.00205
661	Q8VD04	GRIP1-associated protein 1 OS=Mus musculus GN=Gripap1 PE=1 SV=1 - [GRAP1_MOUSE]	9	92.6584	123.642	14.64	1.0075	0.949887	0.861857	1.03895	0.988967	0.969327
662	Q9D0I9	Arginine--tRNA ligase, cytoplasmic OS=Mus musculus GN=Rars PE=1 SV=2 - [SYRC_MOUSE]	9	75.6251	119.483	14.7	1.11185	0.977847	0.870031	0.895598	1.10166	1.07993
663	Q01405	Protein transport protein Sec23A OS=Mus musculus GN=Sec23a PE=1 SV=2 - [SC23A_MOUSE]	9	86.1064	118.848	15.42	0.997506	0.857237	0.925482	0.966575	0.962905	1.03567
664	Q80U23	Syntaphilin OS=Mus musculus GN=Snph PE=1 SV=3 - [SNPH_MOUSE]	9	53.7196	116.582	22.22	0.971822	1.01954	1.1486	0.979039	0.957819	0.962629
665	Q8C052	Microtubule-associated protein 1S OS=Mus musculus GN=Map1s PE=1 SV=2 - [MAP1S_MOUSE]	9	102.875	108.737	10.38	1.0007	0.895304	0.872242	0.998388	1.11774	1.06403
666	Q6ZPJ3	(E3-independent) E2 ubiquitin-conjugating enzyme UBE2O OS=Mus musculus GN=Ube2o PE=1 SV=3 - [UBE2O_MOUSE]	9	140.746	107.531	8.39	0.996194	0.96213	0.987286	1.00867	0.957521	1.0265
667	O35685	Nuclear migration protein nudC OS=Mus musculus GN=Nudc PE=1 SV=1 - [NUDC_MOUSE]	9	38.3343	105.64	28.61	1.04466	0.958739	0.913586	1.03439	1.02063	0.994783
668	Q811D0	Disks large homolog 1 OS=Mus musculus GN=Dlg1 PE=1 SV=1 - [DLG1_MOUSE]	9	100.058	104.599	18.34	0.962516	0.996979	1.03574	0.950228	0.940258	1.07259
669	P48320	Glutamate decarboxylase 2 OS=Mus musculus GN=Gad2 PE=1 SV=1 - [DCE2_MOUSE]	9	65.1815	103.916	19.66	0.944341	1.00439	0.972763	0.97573	0.927026	1.04722
670	Q8VCW8	Acyl-CoA synthetase family member 2, mitochondrial OS=Mus musculus GN=Acsf2 PE=1 SV=1 - [ACSF2_MOUSE]	9	67.907	100.534	18.05	1.06848	1.03427	0.98356	0.958215	0.934016	1.01475
671	Q8K4G5	Actin-binding LIM protein 1 OS=Mus musculus GN=Ablim1 PE=1 SV=1 - [ABLM1_MOUSE]	9	96.7428	100.475	12.31	1.09943	0.963993	1.06275	1.00924	0.975737	0.977495
672	Q8BP67	60S ribosomal protein L24 OS=Mus musculus GN=Rpl24 PE=1 SV=2 - [RL24_MOUSE]	9	17.7679	96.0134	45.86	1.00255	1.0671	1.14023	0.985086	0.991995	1.0858
673	Q9ESW4	Acylglycerol kinase, mitochondrial OS=Mus musculus GN=Agk PE=1 SV=1 - [AGK_MOUSE]	9	46.9463	94.6645	23.99	1.02878	0.977353	1.02572	0.979945	0.987968	0.972871
674	Q80YA9	Connector enhancer of kinase suppressor of ras 2 OS=Mus musculus GN=Cnksr2 PE=1 SV=1 - [CNKR2_MOUSE]	9	117.323	94.2	8.62	1.03235	1.00989	1.12739	0.975881	1.03722	1.00089
675	Q01065	Calcium/calmodulin-dependent 3',5'-cyclic nucleotide phosphodiesterase 1B OS=Mus musculus GN=Pde1b PE=1 SV=2 - [PDE1B_MOUSE]	9	61.1867	87.2717	20.37	0.927932	0.928983	0.677356	1.02718	0.903766	0.931464
676	Q9CQW1	Synaptobrevin homolog YKT6 OS=Mus musculus GN=Ykt6 PE=1 SV=1 - [YKT6_MOUSE]	9	22.3003	84.9927	50.51	1.00503	1.13906	1.00883	1.11753	0.989666	0.949541
677	Q505F5	Leucine-rich repeat-containing protein 47 OS=Mus musculus GN=Lrrc47 PE=1 SV=1 - [LRC47_MOUSE]	9	63.5507	79.8121	17.21	1.07696	0.944068	0.910113	0.990424	1.04011	0.965099
678	Q8K212	Phosphofurin acidic cluster sorting protein 1 OS=Mus musculus GN=Pacs1 PE=1 SV=2 - [PACS1_MOUSE]	9	104.764	78.8075	10.09	0.951908	0.977145	1.00313	0.955451	1.02211	1.02859
679	P62281	40S ribosomal protein S11 OS=Mus musculus GN=Rps11 PE=1 SV=3 - [RS11_MOUSE]	9	18.419	78.2388	48.73	1.07956	0.987734	1.09795	1.01131	0.984339	1.03933
680	P13020	Gelsolin OS=Mus musculus GN=Gsn PE=1 SV=3 - [GELS_MOUSE]	9	85.8881	73.9986	12.56	1.0699	1.01515	0.967913	0.96255	0.954125	1.0203
681	O35250	Exocyst complex component 7 OS=Mus musculus GN=Exoc7 PE=1 SV=2 - [EXOC7_MOUSE]	9	79.9105	73.216	15.06	0.997555	1.00104	0.892148	1.04093	1.00219	0.955145
682	Q922Q1	Mitochondrial amidoxime reducing component 2 OS=Mus musculus GN=Marc2 PE=1 SV=1 - [MARC2_MOUSE]	9	38.1696	70.9887	24.85	0.955746	1.03522	1.17428	1.04827	0.932669	0.936071
683	Q64331	Unconventional myosin-VI OS=Mus musculus GN=Myo6 PE=1 SV=1 - [MYO6_MOUSE]	9	146.317	69.0154	7.27	1.16252	0.921677	0.968626	1.07599	1.02829	0.924137
684	O88910	MAGUK p55 subfamily member 3 OS=Mus musculus GN=Mpp3 PE=1 SV=2 - [MPP3_MOUSE]	9	64.3609	65.8395	21.13	0.914969	1.04119	1.01753	0.933133	0.938735	1.00495
685	Q9JLJ2	4-trimethylaminobutyraldehyde dehydrogenase OS=Mus musculus GN=Aldh9a1 PE=1 SV=1 - [AL9A1_MOUSE]	9	53.4801	58.353	19.43	1.11492	0.994709	0.912412	1.00272	1.01737	1.03522
686	Q3UVX5	Metabotropic glutamate receptor 5 OS=Mus musculus GN=Grm5 PE=1 SV=2 - [GRM5_MOUSE]	9	131.78	54.5804	8.4	0.917999	0.979179	0.937535	1.039	0.964788	0.940756
687	Q7TMY8	E3 ubiquitin-protein ligase HUWE1 OS=Mus musculus GN=Huwe1 PE=1 SV=5 - [HUWE1_MOUSE]	9	482.332	43.7599	2.42	0.974189	1.00444	1.02829	1.01721	0.988121	0.95762
688	Q61035	Histidine--tRNA ligase, cytoplasmic OS=Mus musculus GN=Hars PE=1 SV=2 - [SYHC_MOUSE]	9	57.3961	41.977	18.86	0.994316	0.96002	0.98493	1.07312	0.98083	0.950993
689	P39447	Tight junction protein ZO-1 OS=Mus musculus GN=Tjp1 PE=1 SV=2 - [ZO1_MOUSE]	9	194.622	35.4776	6.53	0.972262	1.00361	0.993966	0.912691	1.0532	0.974154
690	O54988	STE20-like serine/threonine-protein kinase OS=Mus musculus GN=Slk PE=1 SV=2 - [SLK_MOUSE]	9	141.37	33.8625	8.11	0.938915	1.03433	1.0649	1.03974	0.994105	0.962997
691	Q91ZU6	Dystonin OS=Mus musculus GN=Dst PE=1 SV=2 - [DYST_MOUSE]	9	833.701	27.6157	1.66	0.929092	1.00767	0.907658	0.989164	1.01994	1.01586
692	Q9ERD7	Tubulin beta-3 chain OS=Mus musculus GN=Tubb3 PE=1 SV=1 - [TBB3_MOUSE]	8	50.3862	8462.5	66.22	1.05679	0.989014	1.01391	1.11945	0.970578	1.05455
693	P62874	Guanine nucleotide-binding protein G(I)/G(S)/G(T) subunit beta-1 OS=Mus musculus GN=Gnb1 PE=1 SV=3 - [GBB1_MOUSE]	8	37.353	2036.17	45	0.970597	1.01723	1.1132	0.930892	0.953205	1.03889
694	P62806	Histone H4 OS=Mus musculus GN=Hist1h4a PE=1 SV=2 - [H4_MOUSE]	8	11.3604	1724.43	53.4	1.03702	0.927141	1.01542	0.861142	1.06146	1.10603
695	Q9CQV8	14-3-3 protein beta/alpha OS=Mus musculus GN=Ywhab PE=1 SV=3 - [1433B_MOUSE]	8	28.0689	1493.8	67.07	1.10132	1.03233	0.977656	1.09375	1.00264	1.0178
696	P01942	Hemoglobin subunit alpha OS=Mus musculus GN=Hba PE=1 SV=2 - [HBA_MOUSE]	8	15.0758	1110.58	50.7	1.25863	0.796618	1.16667	0.995611	0.963204	1.12395
697	P62821	Ras-related protein Rab-1A OS=Mus musculus GN=Rab1A PE=1 SV=3 - [RAB1A_MOUSE]	8	22.6634	859.141	77.07	1.0067	1.03895	1.02116	0.915398	0.906594	1.00011
698	B2RSH2	Guanine nucleotide-binding protein G(i) subunit alpha-1 OS=Mus musculus GN=Gnai1 PE=1 SV=1 - [GNAI1_MOUSE]	8	40.3352	760.353	44.35	0.978212	1.0839	1.05789	1.00847	1.02707	0.937584
699	P08752	Guanine nucleotide-binding protein G(i) subunit alpha-2 OS=Mus musculus GN=Gnai2 PE=1 SV=5 - [GNAI2_MOUSE]	8	40.463	705.837	54.37	0.906984	1.10333	1.04963	0.915478	1.06197	1.02158
700	P56391	Cytochrome c oxidase subunit 6B1 OS=Mus musculus GN=Cox6b1 PE=1 SV=2 - [CX6B1_MOUSE]	8	10.0649	673.538	70.93	0.942657	0.979665	1.14623	1.02	0.977784	0.991636
701	P12787	Cytochrome c oxidase subunit 5A, mitochondrial OS=Mus musculus GN=Cox5a PE=1 SV=2 - [COX5A_MOUSE]	8	16.0913	616.624	39.04	0.957423	1.0231	1.1254	1.00225	0.997622	1.03245
702	P21107	Tropomyosin alpha-3 chain OS=Mus musculus GN=Tpm3 PE=1 SV=3 - [TPM3_MOUSE]	8	32.9738	521.243	40.35	1.05667	1.1045	1.01395	0.996782	1.0414	0.966679
703	P62242	40S ribosomal protein S8 OS=Mus musculus GN=Rps8 PE=1 SV=2 - [RS8_MOUSE]	8	24.1902	491.764	48.56	1.04354	0.95833	1.07631	0.99903	1.03428	1.07153
704	P62897	Cytochrome c, somatic OS=Mus musculus GN=Cycs PE=1 SV=2 - [CYC_MOUSE]	8	11.598	488.819	57.14	1.07112	1.03535	1.08867	1.13843	0.986967	1.07252
705	P09671	Superoxide dismutase [Mn], mitochondrial OS=Mus musculus GN=Sod2 PE=1 SV=3 - [SODM_MOUSE]	8	24.5875	488.646	33.33	1.17578	0.938465	0.964005	1.04698	1.00819	1.00502
706	P19536	Cytochrome c oxidase subunit 5B, mitochondrial OS=Mus musculus GN=Cox5b PE=1 SV=1 - [COX5B_MOUSE]	8	13.8039	473.658	42.97	0.988161	1.09281	1.18323	1.00939	0.961217	1.06711
707	Q7TMB8	Cytoplasmic FMR1-interacting protein 1 OS=Mus musculus GN=Cyfip1 PE=1 SV=1 - [CYFP1_MOUSE]	8	145.148	468.34	22.83	1.05901	0.954577	0.913934	1.08977	1.00281	0.911338
708	P60335	Poly(rC)-binding protein 1 OS=Mus musculus GN=Pcbp1 PE=1 SV=1 - [PCBP1_MOUSE]	8	37.4739	451.785	42.42	0.955761	1.04417	0.961506	1.01905	0.981478	1.04552
709	P47757	F-actin-capping protein subunit beta OS=Mus musculus GN=Capzb PE=1 SV=3 - [CAPZB_MOUSE]	8	31.3258	434.781	36.46	1.03085	1.04657	0.991418	1.03376	0.977048	0.952289
710	Q8K3J1	NADH dehydrogenase [ubiquinone] iron-sulfur protein 8, mitochondrial OS=Mus musculus GN=Ndufs8 PE=1 SV=1 - [NDUS8_MOUSE]	8	24.0228	357.243	38.21	0.903407	1.00169	1.10663	1.00618	0.989199	0.99672
711	P28661	Septin-4 OS=Mus musculus GN=Sept4 PE=1 SV=1 - [SEPT4_MOUSE]	8	54.9015	354.352	22.38	0.99042	1.02022	1.14183	0.902106	1.04926	1.12556
712	P00920	Carbonic anhydrase 2 OS=Mus musculus GN=Ca2 PE=1 SV=4 - [CAH2_MOUSE]	8	29.0145	347.035	39.23	1.01282	1.19915	1.00299	0.931539	1.20662	1.29243
713	Q08331	Calretinin OS=Mus musculus GN=Calb2 PE=1 SV=3 - [CALB2_MOUSE]	8	31.3525	341.355	33.58	1.27724	0.816641	0.649728	1.13624	1.00644	0.863971
714	Q3TXX4	Vesicular glutamate transporter 1 OS=Mus musculus GN=Slc17a7 PE=1 SV=2 - [VGLU1_MOUSE]	8	61.5972	321.449	16.79	0.964381	1.08842	1.23783	1.02333	0.914435	0.926977
715	Q922R8	Protein disulfide-isomerase A6 OS=Mus musculus GN=Pdia6 PE=1 SV=3 - [PDIA6_MOUSE]	8	48.0703	307.903	22.73	1.07602	1.03004	1.02892	0.988081	1.02016	0.968511
716	Q8BK64	Activator of 90 kDa heat shock protein ATPase homolog 1 OS=Mus musculus GN=Ahsa1 PE=1 SV=2 - [AHSA1_MOUSE]	8	38.0932	306.844	25.44	1.15528	0.914125	0.899935	1.00449	1.03582	1.01695
717	Q9CQZ5	NADH dehydrogenase [ubiquinone] 1 alpha subcomplex subunit 6 OS=Mus musculus GN=Ndufa6 PE=1 SV=1 - [NDUA6_MOUSE]	8	15.273	290.162	51.15	1.09409	0.826528	1.0758	1.00667	0.994459	1.02583
718	Q9ERS2	NADH dehydrogenase [ubiquinone] 1 alpha subcomplex subunit 13 OS=Mus musculus GN=Ndufa13 PE=1 SV=3 - [NDUAD_MOUSE]	8	16.8486	289.846	53.47	0.939272	0.998955	1.04523	1.0018	0.999882	0.971903
719	Q9CQQ7	ATP synthase F(0) complex subunit B1, mitochondrial OS=Mus musculus GN=Atp5f1 PE=1 SV=1 - [AT5F1_MOUSE]	8	28.9304	284.088	23.83	0.889283	1.09026	1.2379	1.01052	0.928088	1.00349
720	Q61937	Nucleophosmin OS=Mus musculus GN=Npm1 PE=1 SV=1 - [NPM_MOUSE]	8	32.5398	258.962	28.77	0.963205	1.04094	1.0176	0.959467	0.925936	1.01646
721	B0V2N1	Receptor-type tyrosine-protein phosphatase S OS=Mus musculus GN=Ptprs PE=1 SV=1 - [PTPRS_MOUSE]	8	211.771	250.251	10.23	1.07256	0.982418	0.923316	1.11097	0.970937	0.968996
722	P13707	Glycerol-3-phosphate dehydrogenase [NAD(+)], cytoplasmic OS=Mus musculus GN=Gpd1 PE=1 SV=3 - [GPDA_MOUSE]	8	37.5484	244.098	32.38	1.01804	1.06307	1.04694	0.99104	1.00359	1.06953
723	Q9D1T0	Leucine-rich repeat and immunoglobulin-like domain-containing nogo receptor-interacting protein 1 OS=Mus musculus GN=Lingo1 PE=1 SV=1 - [LIGO1_MOUSE]	8	69.0569	237.145	15.8	0.873012	1.06543	1.04593	1.00892	1.04071	0.956342
724	Q60605	Myosin light polypeptide 6 OS=Mus musculus GN=Myl6 PE=1 SV=3 - [MYL6_MOUSE]	8	16.9191	235.758	60.26	1.08612	1.03212	0.991975	0.969994	0.938813	1.03708
725	P52760	2-iminobutanoate/2-iminopropanoate deaminase OS=Mus musculus GN=Rida PE=1 SV=3 - [RIDA_MOUSE]	8	14.2465	234.673	65.19	1.09799	1.04999	0.850153	1.09894	1.02095	1.05239
726	Q8CCT4	Transcription elongation factor A protein-like 5 OS=Mus musculus GN=Tceal5 PE=1 SV=1 - [TCAL5_MOUSE]	8	22.0247	230.545	36	0.966446	0.931378	0.943838	0.953136	1.00278	1.10933
727	Q9CPU0	Lactoylglutathione lyase OS=Mus musculus GN=Glo1 PE=1 SV=3 - [LGUL_MOUSE]	8	20.7964	220.029	34.78	1.13841	0.791032	0.917727	1.04512	1.01232	1.27383
728	Q6PDM2	Serine/arginine-rich splicing factor 1 OS=Mus musculus GN=Srsf1 PE=1 SV=3 - [SRSF1_MOUSE]	8	27.7278	198.263	37.1	1.01233	0.945825	0.996784	0.939644	1.02595	1.02509
729	Q9CQH3	NADH dehydrogenase [ubiquinone] 1 beta subcomplex subunit 5, mitochondrial OS=Mus musculus GN=Ndufb5 PE=1 SV=1 - [NDUB5_MOUSE]	8	21.6964	192.873	28.04	1.00628	1.02127	1.11978	0.958176	1.06491	1.01058
730	O55125	Protein NipSnap homolog 1 OS=Mus musculus GN=Nipsnap1 PE=1 SV=1 - [NIPS1_MOUSE]	8	33.342	192.805	28.17	0.999096	0.917671	1.06706	1.11722	0.977332	0.99958
731	Q9DBC7	cAMP-dependent protein kinase type I-alpha regulatory subunit OS=Mus musculus GN=Prkar1a PE=1 SV=3 - [KAP0_MOUSE]	8	43.158	189.909	28.61	0.922526	0.954396	0.955201	0.917653	1.01771	1.02423
732	O35465	Peptidyl-prolyl cis-trans isomerase FKBP8 OS=Mus musculus GN=Fkbp8 PE=1 SV=2 - [FKBP8_MOUSE]	8	43.5013	188.086	24.63	0.970933	0.956055	0.927984	1.01001	1.00911	0.987696
733	P62082	40S ribosomal protein S7 OS=Mus musculus GN=Rps7 PE=2 SV=1 - [RS7_MOUSE]	8	22.1133	185.76	37.63	1.11368	0.839391	0.884746	0.994366	0.98736	0.953852
734	O35215	D-dopachrome decarboxylase OS=Mus musculus GN=Ddt PE=1 SV=3 - [DOPD_MOUSE]	8	13.0688	184.977	63.56	1.06595	1.03416	0.985375	0.993617	1.0596	1.08094
735	P49442	Inositol polyphosphate 1-phosphatase OS=Mus musculus GN=Inpp1 PE=1 SV=2 - [INPP_MOUSE]	8	43.3189	182.872	25.51	1.10587	0.948911	0.89327	1.02651	1.07967	1.01203
736	Q9Z1N5	Spliceosome RNA helicase Ddx39b OS=Mus musculus GN=Ddx39b PE=1 SV=1 - [DX39B_MOUSE]	8	49.004	181.926	19.39	0.85211	1.13088	1.07208	1.03566	0.930137	1.00921
737	O88485	Cytoplasmic dynein 1 intermediate chain 1 OS=Mus musculus GN=Dync1i1 PE=1 SV=2 - [DC1I1_MOUSE]	8	70.6806	180.907	17.04	0.996394	0.997791	0.893991	1.0411	0.964682	0.984802
738	Q8R2R9	AP-3 complex subunit mu-2 OS=Mus musculus GN=Ap3m2 PE=1 SV=1 - [AP3M2_MOUSE]	8	46.8864	177.498	26.56	0.99197	1.07381	1.0378	0.992989	1.05026	1.01471
739	Q9ESN6	Tripartite motif-containing protein 2 OS=Mus musculus GN=Trim2 PE=1 SV=1 - [TRIM2_MOUSE]	8	81.3941	171.2	15.73	1.10862	0.967351	0.906449	0.931021	1.07845	1.00029
740	P56812	Programmed cell death protein 5 OS=Mus musculus GN=Pdcd5 PE=1 SV=3 - [PDCD5_MOUSE]	8	14.2663	169.07	66.67	1.00968	0.947271	0.898088	1.00683	1.05807	1.03829
741	P62754	40S ribosomal protein S6 OS=Mus musculus GN=Rps6 PE=1 SV=1 - [RS6_MOUSE]	8	28.663	165.938	31.73	1.08998	0.917248	0.961723	0.963206	1.01727	1.00796
742	Q3UMR5	Calcium uniporter protein, mitochondrial OS=Mus musculus GN=Mcu PE=1 SV=2 - [MCU_MOUSE]	8	39.6566	162.839	28.57	1.0718	0.989012	0.967086	0.992004	1.08902	0.990911
743	Q9JHI5	Isovaleryl-CoA dehydrogenase, mitochondrial OS=Mus musculus GN=Ivd PE=1 SV=1 - [IVD_MOUSE]	8	46.2959	159.889	22.41	1.06131	1.0104	0.945425	0.989107	1.04356	1.0856
744	Q68FH0	Plakophilin-4 OS=Mus musculus GN=Pkp4 PE=1 SV=1 - [PKP4_MOUSE]	8	131.47	157.965	8.91	1.07371	0.908534	0.964787	1.01886	0.969634	0.93781
745	Q9QYS2	Metabotropic glutamate receptor 3 OS=Mus musculus GN=Grm3 PE=1 SV=1 - [GRM3_MOUSE]	8	99.0498	156.68	12.51	0.911076	1.03884	1.12364	1.08441	0.863471	0.879783
746	Q99N28	Cell adhesion molecule 3 OS=Mus musculus GN=Cadm3 PE=1 SV=1 - [CADM3_MOUSE]	8	42.9375	156.212	30.3	0.917037	1.08118	1.05742	0.913734	0.949025	1.01458
747	Q9CQ54	NADH dehydrogenase [ubiquinone] 1 subunit C2 OS=Mus musculus GN=Ndufc2 PE=1 SV=1 - [NDUC2_MOUSE]	8	14.1542	149.138	58.33	0.93166	1.03835	1.02054	0.968433	0.987207	0.983528
748	Q8BGT8	Phytanoyl-CoA hydroxylase-interacting protein-like OS=Mus musculus GN=Phyhipl PE=1 SV=1 - [PHIPL_MOUSE]	8	42.3139	149.066	27.47	1.06578	0.993211	0.978101	1.01416	0.901035	1.01011
749	Q9CRB9	MICOS complex subunit Mic19 OS=Mus musculus GN=Chchd3 PE=1 SV=1 - [MIC19_MOUSE]	8	26.3182	146.179	31.72	0.987448	1.05401	1.09578	1.00839	0.99246	1.03985
750	O35864	COP9 signalosome complex subunit 5 OS=Mus musculus GN=Cops5 PE=1 SV=3 - [CSN5_MOUSE]	8	37.5247	140.752	25.15	0.956665	0.918406	0.953497	1.0421	1.05045	0.976502
751	P14685	26S proteasome non-ATPase regulatory subunit 3 OS=Mus musculus GN=Psmd3 PE=1 SV=3 - [PSMD3_MOUSE]	8	60.6803	134.996	17.74	0.959427	1.10532	1.02847	1.00368	0.981471	0.96317
752	P02301	Histone H3.3C OS=Mus musculus GN=H3f3c PE=3 SV=3 - [H3C_MOUSE]	8	15.3055	130.482	33.82	1.00996	0.941239	1.09721	0.885476	0.996274	1.13059
753	P70441	Na(+)/H(+) exchange regulatory cofactor NHE-RF1 OS=Mus musculus GN=Slc9a3r1 PE=1 SV=3 - [NHRF1_MOUSE]	8	38.5765	129.427	23.94	1.04244	1.03193	1.00891	1.10814	0.925597	0.950567
754	Q5DTL9	Sodium-driven chloride bicarbonate exchanger OS=Mus musculus GN=Slc4a10 PE=1 SV=2 - [S4A10_MOUSE]	8	125.736	125.118	9.57	0.986057	1.03572	1.0743	0.951836	1.02515	1.08654
755	Q812A2	SLIT-ROBO Rho GTPase-activating protein 3 OS=Mus musculus GN=Srgap3 PE=1 SV=1 - [SRGP3_MOUSE]	8	124.341	123.409	8.55	1.08104	1.00414	1.01926	0.962791	0.972191	0.996462
756	Q3TDK6	Protein rogdi homolog OS=Mus musculus GN=Rogdi PE=1 SV=2 - [ROGDI_MOUSE]	8	32.0797	119.087	28.92	0.986903	1.04406	0.970471	1.09075	0.95335	0.969266
757	Q9CPP6	NADH dehydrogenase [ubiquinone] 1 alpha subcomplex subunit 5 OS=Mus musculus GN=Ndufa5 PE=1 SV=3 - [NDUA5_MOUSE]	8	13.3512	117.695	58.62	1.02076	0.992448	1.15368	0.976445	0.981176	1.02672
758	O54829	Regulator of G-protein signaling 7 OS=Mus musculus GN=Rgs7 PE=1 SV=2 - [RGS7_MOUSE]	8	54.7577	116.943	24.09	0.878247	1.13249	1.24531	0.962082	1.01078	1.02131
759	Q3TEA8	Heterochromatin protein 1-binding protein 3 OS=Mus musculus GN=Hp1bp3 PE=1 SV=1 - [HP1B3_MOUSE]	8	60.8291	116.361	14.98	0.997443	1.04442	1.01605	0.946608	1.04047	1.05618
760	Q61490	CD166 antigen OS=Mus musculus GN=Alcam PE=1 SV=3 - [CD166_MOUSE]	8	65.051	113.46	18.52	0.964465	1.03027	0.913591	0.918494	1.03514	0.961449
761	P97370	Sodium/potassium-transporting ATPase subunit beta-3 OS=Mus musculus GN=Atp1b3 PE=1 SV=1 - [AT1B3_MOUSE]	8	31.7552	111.659	35.61	0.896847	1.1141	1.0862	0.900485	1.01373	1.05628
762	P70372	ELAV-like protein 1 OS=Mus musculus GN=Elavl1 PE=1 SV=2 - [ELAV1_MOUSE]	8	36.1461	111.411	25.77	0.940557	1.01607	1.07737	0.950098	1.01123	1.00311
763	O88447	Kinesin light chain 1 OS=Mus musculus GN=Klc1 PE=1 SV=3 - [KLC1_MOUSE]	8	61.4118	110.587	24.03	1.02289	0.978837	0.953379	1.05112	0.950874	1.00116
764	D3YVF0	A-kinase anchor protein 5 OS=Mus musculus GN=Akap5 PE=1 SV=2 - [AKAP5_MOUSE]	8	79.3495	109.88	12.08	1.0505	0.929446	0.885478	0.902277	1.01676	1.0414
765	Q03517	Secretogranin-2 OS=Mus musculus GN=Scg2 PE=1 SV=1 - [SCG2_MOUSE]	8	70.6004	108.256	13.13	1.01353	0.936437	0.79416	1.11047	0.959089	1.03893
766	Q8BL65	Actin-binding LIM protein 2 OS=Mus musculus GN=Ablim2 PE=1 SV=1 - [ABLM2_MOUSE]	8	68.0632	107.372	16.83	1.00033	1.00239	1.05603	1.04172	0.977445	0.951569
767	P06801	NADP-dependent malic enzyme OS=Mus musculus GN=Me1 PE=1 SV=2 - [MAOX_MOUSE]	8	63.9131	106.502	17.48	1.04453	1.02762	1.00919	1.05071	0.998152	0.990388
768	Q9D819	Inorganic pyrophosphatase OS=Mus musculus GN=Ppa1 PE=1 SV=1 - [IPYR_MOUSE]	8	32.6462	106.306	29.41	1.03992	0.915384	0.904041	1.03629	0.969212	1.04517
769	Q9CWJ9	Bifunctional purine biosynthesis protein PURH OS=Mus musculus GN=Atic PE=1 SV=2 - [PUR9_MOUSE]	8	64.1771	105.662	16.39	1.0015	0.864278	0.781623	1.09706	0.980227	0.95222
770	Q11136	Xaa-Pro dipeptidase OS=Mus musculus GN=Pepd PE=1 SV=3 - [PEPD_MOUSE]	8	54.993	99.8037	19.68	0.988145	1.01653	0.995925	0.952931	1.01642	1.06644
771	Q8JZN5	Acyl-CoA dehydrogenase family member 9, mitochondrial OS=Mus musculus GN=Acad9 PE=1 SV=2 - [ACAD9_MOUSE]	8	68.6787	99.6909	14.56	0.926567	1.11588	1.13902	1.0124	0.986665	1.04595
772	Q80UJ7	Rab3 GTPase-activating protein catalytic subunit OS=Mus musculus GN=Rab3gap1 PE=1 SV=4 - [RB3GP_MOUSE]	8	110.128	98.4008	10.09	0.981398	0.942698	0.95981	1.10885	0.984619	0.953468
773	P40630	Transcription factor A, mitochondrial OS=Mus musculus GN=Tfam PE=1 SV=2 - [TFAM_MOUSE]	8	27.9696	94.3018	25.93	1.01426	0.984093	0.948371	0.970378	0.962942	0.969772
774	Q9WV80	Sorting nexin-1 OS=Mus musculus GN=Snx1 PE=1 SV=1 - [SNX1_MOUSE]	8	58.9156	91.5135	19.92	1.04159	0.94126	0.958109	0.981146	0.994924	1.0292
775	Q5DU25	IQ motif and SEC7 domain-containing protein 2 OS=Mus musculus GN=Iqsec2 PE=1 SV=3 - [IQEC2_MOUSE]	8	161.687	91.3552	8.59	0.936677	1.10283	1.08155	0.97867	0.944112	0.968043
776	O08529	Calpain-2 catalytic subunit OS=Mus musculus GN=Capn2 PE=1 SV=4 - [CAN2_MOUSE]	8	79.8218	90.1315	12.43	1.15389	1.00886	1.01115	0.945577	0.982049	1.00398
777	Q8CHT1	Ephexin-1 OS=Mus musculus GN=Ngef PE=1 SV=1 - [NGEF_MOUSE]	8	82.1477	86.667	13.52	0.927415	1.0349	0.995648	1.03354	1.0761	1.01409
778	P55264	Adenosine kinase OS=Mus musculus GN=Adk PE=1 SV=2 - [ADK_MOUSE]	8	40.1235	86.6226	22.44	0.976461	1.03492	1.0027	1.07561	0.991047	1.00042
779	P61222	ATP-binding cassette sub-family E member 1 OS=Mus musculus GN=Abce1 PE=1 SV=1 - [ABCE1_MOUSE]	8	67.271	82.2768	15.03	0.987563	0.854346	0.906332	0.975743	1.12127	0.998821
780	Q9WVK8	Cholesterol 24-hydroxylase OS=Mus musculus GN=Cyp46a1 PE=1 SV=1 - [CP46A_MOUSE]	8	56.7775	80.3958	18.6	0.946651	1.04169	1.15851	1.06367	0.871346	0.915359
781	Q61838	Pregnancy zone protein OS=Mus musculus GN=Pzp PE=1 SV=3 - [PZP_MOUSE]	8	165.748	75.5379	5.69	1.07355	0.989124	0.853876	1.02845	0.958567	0.933697
782	Q8BNY6	Neuronal calcium sensor 1 OS=Mus musculus GN=Ncs1 PE=1 SV=3 - [NCS1_MOUSE]	8	21.8649	73.8693	48.42	1.03181	0.993909	0.997749	1.07139	1.00099	0.948434
783	Q9WV54	Acid ceramidase OS=Mus musculus GN=Asah1 PE=1 SV=1 - [ASAH1_MOUSE]	8	44.6408	71.8153	21.83	1.09317	0.85766	0.922998	1.00704	0.948581	0.951545
784	Q00623	Apolipoprotein A-I OS=Mus musculus GN=Apoa1 PE=1 SV=2 - [APOA1_MOUSE]	8	30.5966	70.4806	29.92	1.23025	0.984689	0.825164	1.03763	1.02557	1.06363
785	O35286	Pre-mRNA-splicing factor ATP-dependent RNA helicase DHX15 OS=Mus musculus GN=Dhx15 PE=1 SV=2 - [DHX15_MOUSE]	8	90.9492	69.8789	11.32	0.953865	1.0374	0.954436	0.98168	0.971054	0.998213
786	Q6PGN3	Serine/threonine-protein kinase DCLK2 OS=Mus musculus GN=Dclk2 PE=1 SV=1 - [DCLK2_MOUSE]	8	82.9272	69.2831	14.55	0.921386	0.954623	0.863936	1.09564	0.935455	0.944265
787	Q6P4T2	U5 small nuclear ribonucleoprotein 200 kDa helicase OS=Mus musculus GN=Snrnp200 PE=1 SV=1 - [U520_MOUSE]	8	244.392	65.5487	4.59	0.898931	0.9529	1.00601	1.02067	0.960772	1.03255
788	Q6P1B1	Xaa-Pro aminopeptidase 1 OS=Mus musculus GN=Xpnpep1 PE=1 SV=1 - [XPP1_MOUSE]	8	69.547	64.5822	15.09	1.08185	0.981857	1.02977	1.02867	1.01912	1.0242
789	Q99LF4	tRNA-splicing ligase RtcB homolog OS=Mus musculus GN=Rtcb PE=1 SV=1 - [RTCB_MOUSE]	8	55.2139	59.9903	16.63	1.00939	1.03768	0.985007	0.991589	0.961868	1.05886
790	O55126	Protein NipSnap homolog 2 OS=Mus musculus GN=Nipsnap2 PE=1 SV=1 - [NIPS2_MOUSE]	8	32.9119	59.3545	30.25	0.971671	1.06712	1.06271	0.989562	0.953545	1.00905
791	Q7TT50	Serine/threonine-protein kinase MRCK beta OS=Mus musculus GN=Cdc42bpb PE=1 SV=2 - [MRCKB_MOUSE]	8	194.63	57.5872	5.37	0.998394	0.905251	0.970225	0.889777	1.11669	1.03049
792	Q9DBF1	Alpha-aminoadipic semialdehyde dehydrogenase OS=Mus musculus GN=Aldh7a1 PE=1 SV=4 - [AL7A1_MOUSE]	8	58.8243	56.1684	20.04	1.00618	1.00957	1.00034	1.03785	0.970774	0.895956
793	P35585	AP-1 complex subunit mu-1 OS=Mus musculus GN=Ap1m1 PE=1 SV=3 - [AP1M1_MOUSE]	8	48.512	55.7818	19.15	0.913521	1.0295	1.04622	1.0412	1.05256	1.02688
794	B9EJA2	Cortactin-binding protein 2 OS=Mus musculus GN=Cttnbp2 PE=1 SV=2 - [CTTB2_MOUSE]	8	178.662	55.5745	5.28	1.02837	0.885373	0.898109	0.968268	1.03832	0.981159
795	Q8JZU2	Tricarboxylate transport protein, mitochondrial OS=Mus musculus GN=Slc25a1 PE=1 SV=1 - [TXTP_MOUSE]	8	33.9099	54.6275	24.12	0.968099	0.920826	0.950926	0.98814	1.01431	0.963384
796	Q9WVE8	Protein kinase C and casein kinase substrate in neurons protein 2 OS=Mus musculus GN=Pacsin2 PE=1 SV=1 - [PACN2_MOUSE]	8	55.7982	52.3359	22.63	1.01892	0.901569	1.00033	1.00738	0.983617	1.0837
797	Q80TS3	Adhesion G protein-coupled receptor L3 OS=Mus musculus GN=Adgrl3 PE=1 SV=3 - [AGRL3_MOUSE]	8	170.971	50.064	5.79	0.962423	0.956461	0.988501	0.974632	0.993935	0.920833
798	P50580	Proliferation-associated protein 2G4 OS=Mus musculus GN=Pa2g4 PE=1 SV=3 - [PA2G4_MOUSE]	8	43.6712	49.7007	22.34	1.01395	1.0352	1.05068	0.953998	1.00711	1.07401
799	Q6A065	Centrosomal protein of 170 kDa OS=Mus musculus GN=Cep170 PE=1 SV=2 - [CE170_MOUSE]	8	174.944	49.4687	6.11	1.0192	0.940133	0.949166	1.00337	0.963906	0.937254
800	Q61292	Laminin subunit beta-2 OS=Mus musculus GN=Lamb2 PE=1 SV=2 - [LAMB2_MOUSE]	8	196.451	47.308	5.23	1.03848	0.911099	1.07525	0.944276	0.899968	0.954458
801	Q99LI8	Hepatocyte growth factor-regulated tyrosine kinase substrate OS=Mus musculus GN=Hgs PE=1 SV=2 - [HGS_MOUSE]	8	85.9605	45.9702	10.06	1.07066	0.89935	0.926092	0.995366	0.980632	1.02512
802	Q6GQS1	Calcium-binding mitochondrial carrier protein SCaMC-3 OS=Mus musculus GN=Slc25a23 PE=1 SV=1 - [SCMC3_MOUSE]	8	52.464	44.7886	17.56	0.92771	0.958888	0.981226	1.05217	0.97988	0.884867
803	Q9EQZ6	Rap guanine nucleotide exchange factor 4 OS=Mus musculus GN=Rapgef4 PE=1 SV=1 - [RPGF4_MOUSE]	8	115.418	35.1376	7.22	0.940604	1.01151	1.08749	0.962894	0.929687	0.940887
804	P61255	60S ribosomal protein L26 OS=Mus musculus GN=Rpl26 PE=1 SV=1 - [RL26_MOUSE]	8	17.2475	27.4679	37.24	1.05025	0.86418	0.989446	0.998722	1.00839	0.948705
805	O55042	Alpha-synuclein OS=Mus musculus GN=Snca PE=1 SV=2 - [SYUA_MOUSE]	7	14.4762	1128.25	64.29	1.25111	0.76704	0.918527	1.08655	1.07251	1.04452
806	Q61696	Heat shock 70 kDa protein 1A OS=Mus musculus GN=Hspa1a PE=1 SV=2 - [HS71A_MOUSE]	7	70.036	851.103	24.18	1.17236	0.915256	0.941693	0.990566	1.10725	1.08954
807	Q9JJV2	Profilin-2 OS=Mus musculus GN=Pfn2 PE=1 SV=3 - [PROF2_MOUSE]	7	15.0223	744.472	39.29	1.04602	1.02599	1.00326	1.01527	1.00209	1.0339
808	Q9D6M3	Mitochondrial glutamate carrier 1 OS=Mus musculus GN=Slc25a22 PE=1 SV=1 - [GHC1_MOUSE]	7	34.6482	585.421	27.55	1.01379	0.935331	1.03646	1.03792	0.98379	0.953179
809	Q9QUI0	Transforming protein RhoA OS=Mus musculus GN=Rhoa PE=1 SV=1 - [RHOA_MOUSE]	7	21.7681	532.682	44.04	0.96869	1.09915	1.08557	0.994987	0.952263	1.03884
810	P62746	Rho-related GTP-binding protein RhoB OS=Mus musculus GN=Rhob PE=1 SV=1 - [RHOB_MOUSE]	7	22.1091	493.28	40.31	0.912286	1.14459	1.12539	0.905876	0.991308	1.02199
811	Q64105	Sepiapterin reductase OS=Mus musculus GN=Spr PE=1 SV=1 - [SPRE_MOUSE]	7	27.8654	456.419	37.93	1.07901	0.934393	0.881461	1.04768	1.00564	0.985049
812	P14206	40S ribosomal protein SA OS=Mus musculus GN=Rpsa PE=1 SV=4 - [RSSA_MOUSE]	7	32.8174	447.721	29.15	0.965419	0.958403	1.00714	1.00159	1.02398	1.01355
813	P19157	Glutathione S-transferase P 1 OS=Mus musculus GN=Gstp1 PE=1 SV=2 - [GSTP1_MOUSE]	7	23.5941	425.887	39.52	1.02932	1.07099	1.0232	0.862538	1.10478	1.23199
814	P48453	Serine/threonine-protein phosphatase 2B catalytic subunit beta isoform OS=Mus musculus GN=Ppp3cb PE=1 SV=2 - [PP2BB_MOUSE]	7	59.1356	423.707	30.1	0.9954	0.98522	0.976394	1.00345	0.974791	1.01989
815	Q62277	Synaptophysin OS=Mus musculus GN=Syp PE=1 SV=2 - [SYPH_MOUSE]	7	34.0025	369.975	25.48	0.910339	1.12375	1.1724	0.996139	0.933541	0.907309
816	Q791V5	Mitochondrial carrier homolog 2 OS=Mus musculus GN=Mtch2 PE=1 SV=1 - [MTCH2_MOUSE]	7	33.477	335.298	27.06	1.00732	0.952076	1.0081	1.05917	0.970449	1.00581
817	P10922	Histone H1.0 OS=Mus musculus GN=H1f0 PE=2 SV=4 - [H10_MOUSE]	7	20.8482	316.558	30.93	0.990574	1.01503	1.06999	0.879791	1.05777	1.13428
818	P27601	Guanine nucleotide-binding protein subunit alpha-13 OS=Mus musculus GN=Gna13 PE=1 SV=1 - [GNA13_MOUSE]	7	44.0268	306.259	25.46	0.885526	1.10961	1.10863	1.01099	0.960133	1.03486
819	P54728	UV excision repair protein RAD23 homolog B OS=Mus musculus GN=Rad23b PE=1 SV=2 - [RD23B_MOUSE]	7	43.4858	304.49	18.51	1.03486	0.97277	0.926194	0.959484	1.04406	1.03844
820	Q9D7X3	Dual specificity protein phosphatase 3 OS=Mus musculus GN=Dusp3 PE=1 SV=1 - [DUS3_MOUSE]	7	20.4592	292.227	50.27	1.0787	0.93415	0.922644	0.9768	1.0725	1.10061
821	Q8BJI1	Sodium-dependent neutral amino acid transporter SLC6A17 OS=Mus musculus GN=Slc6a17 PE=1 SV=1 - [S6A17_MOUSE]	7	81.0183	291.222	11.42	0.988114	1.0542	1.01698	1.01543	0.966001	0.881296
822	Q8BLQ9	Cell adhesion molecule 2 OS=Mus musculus GN=Cadm2 PE=1 SV=2 - [CADM2_MOUSE]	7	47.5291	290.666	17.47	0.938858	1.0668	1.14515	0.859318	0.980958	1.05172
823	Q62425	Cytochrome c oxidase subunit NDUFA4 OS=Mus musculus GN=Ndufa4 PE=1 SV=2 - [NDUA4_MOUSE]	7	9.32087	280.707	56.1	0.928329	1.06058	1.18808	1.08719	0.929951	0.992553
824	Q64010	Adapter molecule crk OS=Mus musculus GN=Crk PE=1 SV=1 - [CRK_MOUSE]	7	33.794	269.482	27.96	1.04397	0.915571	0.873898	0.973148	1.04731	0.990983
825	P63094	Guanine nucleotide-binding protein G(s) subunit alpha isoforms short OS=Mus musculus GN=Gnas PE=1 SV=1 - [GNAS2_MOUSE]	7	45.6349	267.403	23.86	0.967174	1.07475	1.09605	0.937975	0.973706	1.05453
826	Q8BVQ5	Protein phosphatase methylesterase 1 OS=Mus musculus GN=Ppme1 PE=1 SV=5 - [PPME1_MOUSE]	7	42.2292	264.609	20.21	1.05082	1.03467	1.03386	0.970603	0.974279	0.978478
827	Q91Z53	Glyoxylate reductase/hydroxypyruvate reductase OS=Mus musculus GN=Grhpr PE=1 SV=1 - [GRHPR_MOUSE]	7	35.3065	260.131	23.78	1.04683	0.874772	0.880409	1.05749	1.01676	1.00261
828	Q61151	Serine/threonine-protein phosphatase 2A 56 kDa regulatory subunit epsilon isoform OS=Mus musculus GN=Ppp2r5e PE=1 SV=3 - [2A5E_MOUSE]	7	54.6785	249.423	21.63	0.971063	0.955201	1.00241	0.979431	1.0373	0.93868
829	Q80WM4	Hyaluronan and proteoglycan link protein 4 OS=Mus musculus GN=Hapln4 PE=2 SV=2 - [HPLN4_MOUSE]	7	42.7816	248.274	23.5	0.924868	1.00009	1.05131	0.957969	0.96974	1.07546
830	Q9CR57	60S ribosomal protein L14 OS=Mus musculus GN=Rpl14 PE=1 SV=3 - [RL14_MOUSE]	7	23.5492	244.2	31.34	1.09616	0.988303	1.06949	0.966322	1.00124	1.05161
831	Q9JKC6	Cell cycle exit and neuronal differentiation protein 1 OS=Mus musculus GN=Cend1 PE=1 SV=1 - [CEND_MOUSE]	7	14.9778	241.515	36.91	0.967191	1.12974	1.22124	1.0433	0.882813	0.987468
832	Q9D172	ES1 protein homolog, mitochondrial OS=Mus musculus GN=D10Jhu81e PE=1 SV=1 - [ES1_MOUSE]	7	28.0728	240.129	37.97	1.06529	1.0802	1.18304	1.0154	0.960082	1.08383
833	Q8CAY6	Acetyl-CoA acetyltransferase, cytosolic OS=Mus musculus GN=Acat2 PE=1 SV=2 - [THIC_MOUSE]	7	41.2712	239.775	25.44	1.36696	0.856958	0.843462	1.18982	1.04749	0.980287
834	Q9CQE8	RNA transcription, translation and transport factor protein OS=Mus musculus GN=RTRAF PE=1 SV=1 - [RTRAF_MOUSE]	7	28.1348	235.37	35.25	1.02752	1.02371	0.964402	0.938649	1.04081	0.925554
835	Q99LY9	NADH dehydrogenase [ubiquinone] iron-sulfur protein 5 OS=Mus musculus GN=Ndufs5 PE=1 SV=3 - [NDUS5_MOUSE]	7	12.6393	234.687	59.43	1.04966	0.963281	1.09734	1.0127	1.01419	1.11016
836	Q9CQ75	NADH dehydrogenase [ubiquinone] 1 alpha subcomplex subunit 2 OS=Mus musculus GN=Ndufa2 PE=1 SV=3 - [NDUA2_MOUSE]	7	10.9088	226.606	55.56	0.979529	1.02727	1.16109	1.03687	0.975837	1.01723
837	O70435	Proteasome subunit alpha type-3 OS=Mus musculus GN=Psma3 PE=1 SV=3 - [PSA3_MOUSE]	7	28.3871	216.311	29.8	1.03975	0.956695	0.943329	0.989068	1.03069	1.00151
838	P26638	Serine--tRNA ligase, cytoplasmic OS=Mus musculus GN=Sars PE=1 SV=3 - [SYSC_MOUSE]	7	58.3517	210.965	16.8	1.06506	1.01308	0.93713	1.02494	0.990539	0.967018
839	Q9QZ88	Vacuolar protein sorting-associated protein 29 OS=Mus musculus GN=Vps29 PE=1 SV=1 - [VPS29_MOUSE]	7	20.4827	206.182	35.71	0.998835	0.975277	1.06767	1.08004	1.00366	0.97245
840	Q8CHP8	Glycerol-3-phosphate phosphatase OS=Mus musculus GN=Pgp PE=1 SV=1 - [PGP_MOUSE]	7	34.5187	197.581	26.48	1.04452	1.00428	0.999131	1.0371	0.978811	1.03004
841	Q9ER00	Syntaxin-12 OS=Mus musculus GN=Stx12 PE=1 SV=1 - [STX12_MOUSE]	7	31.1759	196.012	30.66	1.13279	1.04061	1.0223	1.03972	0.922013	0.988821
842	P60766	Cell division control protein 42 homolog OS=Mus musculus GN=Cdc42 PE=1 SV=2 - [CDC42_MOUSE]	7	21.245	194.808	48.17	0.924976	1.16208	1.08103	0.955488	1.05635	1.03411
843	P10605	Cathepsin B OS=Mus musculus GN=Ctsb PE=1 SV=2 - [CATB_MOUSE]	7	37.2557	192.766	28.91	0.934732	1.08945	1.11186	0.929917	1.00438	1.0051
844	P35293	Ras-related protein Rab-18 OS=Mus musculus GN=Rab18 PE=1 SV=2 - [RAB18_MOUSE]	7	23.0207	191.01	41.26	0.978186	1.07358	1.16661	1.00132	0.976437	0.959706
845	P60487	Pyridoxal phosphate phosphatase OS=Mus musculus GN=Pdxp PE=1 SV=1 - [PLPP_MOUSE]	7	31.4921	189.197	29.45	1.05319	0.904369	0.888163	1.0081	1.03653	0.999657
846	Q9D0M3	Cytochrome c1, heme protein, mitochondrial OS=Mus musculus GN=Cyc1 PE=1 SV=1 - [CY1_MOUSE]	7	35.3049	179.403	27.08	1.01085	1.00191	1.1068	0.980972	1.02737	1.00668
847	P49615	Cyclin-dependent-like kinase 5 OS=Mus musculus GN=Cdk5 PE=1 SV=1 - [CDK5_MOUSE]	7	33.2672	178.786	28.08	1.02091	1.05309	1.05468	1.04886	1.01669	0.983062
848	A2RT62	F-box/LRR-repeat protein 16 OS=Mus musculus GN=Fbxl16 PE=1 SV=1 - [FXL16_MOUSE]	7	51.8446	177.864	16.7	0.948998	1.00638	0.928606	1.05323	1.05067	0.895035
849	Q148V7	LisH domain and HEAT repeat-containing protein KIAA1468 OS=Mus musculus GN=Kiaa1468 PE=1 SV=1 - [K1468_MOUSE]	7	134.502	177.371	8.31	1.02661	0.974385	0.801014	1.04081	1.00206	0.992499
850	Q9WV55	Vesicle-associated membrane protein-associated protein A OS=Mus musculus GN=Vapa PE=1 SV=2 - [VAPA_MOUSE]	7	27.8373	175.342	28.51	0.925839	1.09474	1.1506	0.975123	0.900514	0.999496
851	P62983	Ubiquitin-40S ribosomal protein S27a OS=Mus musculus GN=Rps27a PE=1 SV=2 - [RS27A_MOUSE]	7	17.9395	174.786	46.15	1.01798	1.17487	1.09111	1.02486	1.00308	1.02783
852	Q3UIU2	NADH dehydrogenase [ubiquinone] 1 beta subcomplex subunit 6 OS=Mus musculus GN=Ndufb6 PE=1 SV=3 - [NDUB6_MOUSE]	7	15.505	172.095	44.53	0.914655	0.979276	1.06932	1.02986	0.990968	0.956817
853	P31650	Sodium- and chloride-dependent GABA transporter 3 OS=Mus musculus GN=Slc6a11 PE=1 SV=2 - [S6A11_MOUSE]	7	69.9143	168.749	11.16	0.94492	1.13593	0.960918	0.993021	0.916371	0.9667
854	P35979	60S ribosomal protein L12 OS=Mus musculus GN=Rpl12 PE=1 SV=2 - [RL12_MOUSE]	7	17.7935	168.174	58.79	0.984054	1.04756	1.053	0.950595	1.00888	1.04549
855	P12658	Calbindin OS=Mus musculus GN=Calb1 PE=1 SV=2 - [CALB1_MOUSE]	7	29.9751	160.194	31.8	1.1168	0.911822	0.737622	1.05878	0.993543	0.829095
856	Q5PR73	GTP-binding protein Di-Ras2 OS=Mus musculus GN=Diras2 PE=1 SV=1 - [DIRA2_MOUSE]	7	22.4836	157.184	42.21	0.979649	1.05131	1.07494	1.02249	1.03735	0.959478
857	Q9WTX5	S-phase kinase-associated protein 1 OS=Mus musculus GN=Skp1 PE=1 SV=3 - [SKP1_MOUSE]	7	18.6603	156.136	35.58	1.09103	1.18636	1.11364	1.07012	0.878085	0.953304
858	Q8C8N2	Protein SCAI OS=Mus musculus GN=Scai PE=1 SV=2 - [SCAI_MOUSE]	7	70.2308	153.624	12.21	1.0831	1.00135	1.00027	1.12012	0.961637	0.912199
859	O35857	Mitochondrial import inner membrane translocase subunit TIM44 OS=Mus musculus GN=Timm44 PE=1 SV=2 - [TIM44_MOUSE]	7	51.0593	147.145	18.14	0.93242	1.03951	0.952811	1.00653	1.03046	1.00004
860	Q640R3	Hepatocyte cell adhesion molecule OS=Mus musculus GN=Hepacam PE=1 SV=2 - [HECAM_MOUSE]	7	46.3384	146.241	23.21	1.01989	1.08943	1.06525	0.999783	0.971103	1.06307
861	P32921	Tryptophan--tRNA ligase, cytoplasmic OS=Mus musculus GN=Wars PE=1 SV=2 - [SYWC_MOUSE]	7	54.3231	145.308	21	1.08271	0.872523	0.913527	0.953296	1.11399	1.01792
862	Q80TR1	Adhesion G protein-coupled receptor L1 OS=Mus musculus GN=Adgrl1 PE=1 SV=2 - [AGRL1_MOUSE]	7	161.583	142.161	5.87	0.924352	1.07027	0.989201	0.90538	0.94928	1.05007
863	Q9QXL2	Kinesin-like protein KIF21A OS=Mus musculus GN=Kif21a PE=1 SV=2 - [KI21A_MOUSE]	7	186.42	141.253	5.38	0.991364	1.06112	0.929637	1.0391	1.00298	0.975876
864	Q6WVG3	BTB/POZ domain-containing protein KCTD12 OS=Mus musculus GN=Kctd12 PE=1 SV=1 - [KCD12_MOUSE]	7	35.8698	140.811	32.42	1.01225	0.963426	0.921715	1.07358	1.0318	1.03545
865	P19253	60S ribosomal protein L13a OS=Mus musculus GN=Rpl13a PE=1 SV=4 - [RL13A_MOUSE]	7	23.4493	139.851	33.5	1.268	0.843615	0.966625	0.95914	0.998728	1.0045
866	Q80TB8	Synaptic vesicle membrane protein VAT-1 homolog-like OS=Mus musculus GN=Vat1l PE=1 SV=2 - [VAT1L_MOUSE]	7	45.7881	139.592	19.9	1.03641	0.88822	0.675686	1.01994	0.962241	0.983744
867	Q5XJY5	Coatomer subunit delta OS=Mus musculus GN=Arcn1 PE=1 SV=2 - [COPD_MOUSE]	7	57.1932	138.488	16.05	1.05072	1.05641	1.04342	1.07659	0.919629	0.950159
868	Q99K51	Plastin-3 OS=Mus musculus GN=Pls3 PE=1 SV=3 - [PLST_MOUSE]	7	70.6972	135.16	20.32	1.0424	0.991184	1.01338	0.932181	1.0182	1.00468
869	P62717	60S ribosomal protein L18a OS=Mus musculus GN=Rpl18a PE=1 SV=1 - [RL18A_MOUSE]	7	20.7189	134.185	38.64	1.04277	0.981469	1.06958	1.00626	0.998747	1.04332
870	P08414	Calcium/calmodulin-dependent protein kinase type IV OS=Mus musculus GN=Camk4 PE=1 SV=2 - [KCC4_MOUSE]	7	52.5944	133.167	16.63	0.919409	1.1143	1.06311	0.97967	0.993839	1.08436
871	Q99K48	Non-POU domain-containing octamer-binding protein OS=Mus musculus GN=Nono PE=1 SV=3 - [NONO_MOUSE]	7	54.5064	130.255	19.87	0.975599	0.941553	1.07775	0.885449	0.991168	1.0866
872	P63028	Translationally-controlled tumor protein OS=Mus musculus GN=Tpt1 PE=1 SV=1 - [TCTP_MOUSE]	7	19.4496	129.218	33.14	1.09478	1.05822	1.05838	0.943926	1.01812	1.13681
873	Q9WUR9	Adenylate kinase 4, mitochondrial OS=Mus musculus GN=Ak4 PE=1 SV=1 - [KAD4_MOUSE]	7	25.0461	125.843	32.74	1.07542	0.929849	0.979408	1.07955	1.14516	0.976628
874	O08795	Glucosidase 2 subunit beta OS=Mus musculus GN=Prkcsh PE=1 SV=1 - [GLU2B_MOUSE]	7	58.7558	125.735	12.67	1.01749	1.10662	1.14252	0.993256	1.01355	1.04484
875	P97384	Annexin A11 OS=Mus musculus GN=Anxa11 PE=1 SV=2 - [ANX11_MOUSE]	7	54.0448	122.447	15.71	0.935114	1.02528	1.05742	0.909611	1.1117	1.08218
876	P60122	RuvB-like 1 OS=Mus musculus GN=Ruvbl1 PE=1 SV=1 - [RUVB1_MOUSE]	7	50.1823	122.376	20.83	1.06792	0.967398	0.98127	0.993477	1.0624	1.00187
877	O88441	Metaxin-2 OS=Mus musculus GN=Mtx2 PE=1 SV=1 - [MTX2_MOUSE]	7	29.739	121.368	27.38	0.974231	1.05465	1.13406	1.01142	0.937721	0.982153
878	Q9D7G0	Ribose-phosphate pyrophosphokinase 1 OS=Mus musculus GN=Prps1 PE=1 SV=4 - [PRPS1_MOUSE]	7	34.8119	120.841	31.13	1.02557	1.0379	1.02036	1.04284	1.17045	1.02999
879	O55234	Proteasome subunit beta type-5 OS=Mus musculus GN=Psmb5 PE=1 SV=3 - [PSB5_MOUSE]	7	28.5142	119.116	30.3	0.975388	1.05844	1.0147	1.0217	0.982884	1.00511
880	Q8K3H0	DCC-interacting protein 13-alpha OS=Mus musculus GN=Appl1 PE=1 SV=1 - [DP13A_MOUSE]	7	79.2784	117.057	14.71	1.17241	0.8862	0.86226	0.92076	0.936925	0.945471
881	O88543	COP9 signalosome complex subunit 3 OS=Mus musculus GN=Cops3 PE=1 SV=3 - [CSN3_MOUSE]	7	47.801	116.624	17.02	1.03478	1.0743	0.928714	0.978871	0.965198	0.976308
882	Q9Z1X4	Interleukin enhancer-binding factor 3 OS=Mus musculus GN=Ilf3 PE=1 SV=2 - [ILF3_MOUSE]	7	95.9614	111.214	8.02	1.00895	0.877275	0.961813	0.973409	1.00306	1.03981
883	Q80YN3	Breast carcinoma-amplified sequence 1 homolog OS=Mus musculus GN=Bcas1 PE=1 SV=3 - [BCAS1_MOUSE]	7	67.3364	110.19	12.8	1.03922	1.01051	0.974734	0.807241	1.24719	1.30756
884	P61202	COP9 signalosome complex subunit 2 OS=Mus musculus GN=Cops2 PE=1 SV=1 - [CSN2_MOUSE]	7	51.5641	108.976	18.74	1.01025	1.05312	1.00069	1.05491	0.999762	1.00943
885	O70439	Syntaxin-7 OS=Mus musculus GN=Stx7 PE=1 SV=3 - [STX7_MOUSE]	7	29.8023	108.211	32.18	0.956096	1.04219	1.02015	1.00517	0.951539	0.876661
886	Q6NS52	Diacylglycerol kinase beta OS=Mus musculus GN=Dgkb PE=1 SV=2 - [DGKB_MOUSE]	7	90.2132	108.201	9.23	0.923082	0.989585	0.881139	1.02055	0.991753	0.940914
887	Q9Z2U1	Proteasome subunit alpha type-5 OS=Mus musculus GN=Psma5 PE=1 SV=1 - [PSA5_MOUSE]	7	26.3942	108.053	37.34	1.17683	0.809461	0.889025	1.02692	0.976289	0.938871
888	P56695	Wolframin OS=Mus musculus GN=Wfs1 PE=1 SV=1 - [WFS1_MOUSE]	7	100.514	107.93	8.2	0.806681	1.11294	0.981631	0.795164	0.926555	1.16132
889	Q80VD1	Protein FAM98B OS=Mus musculus GN=Fam98b PE=1 SV=1 - [FA98B_MOUSE]	7	45.3208	107.409	20.98	1.00705	0.964684	1.01776	0.95806	0.976449	1.0241
890	O08810	116 kDa U5 small nuclear ribonucleoprotein component OS=Mus musculus GN=Eftud2 PE=1 SV=1 - [U5S1_MOUSE]	7	109.291	106.978	9.89	0.897835	1.1499	1.11847	0.952055	0.977206	1.02893
891	P52196	Thiosulfate sulfurtransferase OS=Mus musculus GN=Tst PE=1 SV=3 - [THTR_MOUSE]	7	33.4448	104.079	26.26	1.18975	1.09474	1.06027	1.04978	0.925686	1.03551
892	Q80U63	Mitofusin-2 OS=Mus musculus GN=Mfn2 PE=1 SV=3 - [MFN2_MOUSE]	7	86.1328	100.689	10.04	0.965559	0.989182	0.929674	1.00556	0.94925	0.949114
893	Q9EP69	Phosphatidylinositide phosphatase SAC1 OS=Mus musculus GN=Sacm1l PE=1 SV=1 - [SAC1_MOUSE]	7	66.9009	98.1605	11.93	0.973515	0.982605	1.0336	0.954267	1.03912	0.947128
894	Q922Q8	Leucine-rich repeat-containing protein 59 OS=Mus musculus GN=Lrrc59 PE=1 SV=1 - [LRC59_MOUSE]	7	34.8558	98.067	24.1	0.988153	0.985074	0.950519	0.963384	0.917926	0.99844
895	Q8R326	Paraspeckle component 1 OS=Mus musculus GN=Pspc1 PE=1 SV=1 - [PSPC1_MOUSE]	7	58.7213	97.3584	17.02	1.03107	0.904629	0.933197	1.02034	1.03608	1.04303
896	Q9D415	Disks large-associated protein 1 OS=Mus musculus GN=Dlgap1 PE=1 SV=3 - [DLGP1_MOUSE]	7	110.305	96.2816	9.48	0.940014	1.08983	1.1767	0.969783	1.00798	0.931727
897	Q3ULD5	Methylcrotonoyl-CoA carboxylase beta chain, mitochondrial OS=Mus musculus GN=Mccc2 PE=1 SV=1 - [MCCB_MOUSE]	7	61.3402	96.0689	15.81	1.06154	0.897412	0.926339	0.963387	0.996157	1.04123
898	O54734	Dolichyl-diphosphooligosaccharide--protein glycosyltransferase 48 kDa subunit OS=Mus musculus GN=Ddost PE=1 SV=2 - [OST48_MOUSE]	7	48.997	93.2858	13.38	0.993221	1.0279	1.05576	1.02114	0.950895	0.989343
899	O35551	Rab GTPase-binding effector protein 1 OS=Mus musculus GN=Rabep1 PE=1 SV=2 - [RABE1_MOUSE]	7	99.4624	91.9658	11.6	1.02507	0.978537	0.950572	1.06747	0.970318	0.945448
900	Q7TME0	Phospholipid phosphatase-related protein type 4 OS=Mus musculus GN=Plppr4 PE=1 SV=2 - [PLPR4_MOUSE]	7	83.238	91.8977	9.27	0.964548	0.974509	1.01973	1.07318	1.09133	0.975264
901	P29758	Ornithine aminotransferase, mitochondrial OS=Mus musculus GN=Oat PE=1 SV=1 - [OAT_MOUSE]	7	48.3239	86.8256	19.36	1.07334	0.886213	0.984455	0.975424	0.986421	1.06042
902	Q9WTL7	Acyl-protein thioesterase 2 OS=Mus musculus GN=Lypla2 PE=1 SV=1 - [LYPA2_MOUSE]	7	24.7777	85.8173	35.5	1.12812	0.988521	1.01373	0.973621	1.04698	1.01899
903	Q9CX34	Protein SGT1 homolog OS=Mus musculus GN=Sugt1 PE=1 SV=3 - [SGT1_MOUSE]	7	38.135	85.4625	28.87	1.16306	0.982156	0.951068	1.03908	1.02978	1.00383
904	Q9QY76	Vesicle-associated membrane protein-associated protein B OS=Mus musculus GN=Vapb PE=1 SV=3 - [VAPB_MOUSE]	7	26.929	85.3717	30.45	0.984145	1.121	1.14872	0.947152	0.988201	1.02371
905	Q9D0R2	Threonine--tRNA ligase, cytoplasmic OS=Mus musculus GN=Tars PE=1 SV=2 - [SYTC_MOUSE]	7	83.3029	85.2096	10.53	1.00283	1.019	1.05254	1.0632	1.01617	0.951956
906	Q9Z1L5	Voltage-dependent calcium channel subunit alpha-2/delta-3 OS=Mus musculus GN=Cacna2d3 PE=1 SV=1 - [CA2D3_MOUSE]	7	122.7	84.5888	7.15	0.872706	1.0803	0.984777	1.07753	0.936079	0.936159
907	Q8BMJ2	Leucine--tRNA ligase, cytoplasmic OS=Mus musculus GN=Lars PE=1 SV=2 - [SYLC_MOUSE]	7	134.106	84.0534	6.96	1.08303	0.95351	0.932742	1.06635	0.928537	0.948319
908	Q9CZS1	Aldehyde dehydrogenase X, mitochondrial OS=Mus musculus GN=Aldh1b1 PE=1 SV=1 - [AL1B1_MOUSE]	7	57.5165	83.239	18.3	0.99419	0.928707	0.896746	1.06373	1.03517	0.960415
909	Q8R0A7	Uncharacterized protein KIAA0513 OS=Mus musculus GN=Kiaa0513 PE=1 SV=1 - [K0513_MOUSE]	7	46.2892	81.908	17.69	1.12319	1.06093	1.06853	1.01393	0.866397	1.00315
910	Q8CGF6	WD repeat-containing protein 47 OS=Mus musculus GN=Wdr47 PE=1 SV=2 - [WDR47_MOUSE]	7	102.247	81.4689	8.26	0.922366	0.92891	1.14386	1.15757	0.938815	0.902289
911	Q61330	Contactin-2 OS=Mus musculus GN=Cntn2 PE=1 SV=2 - [CNTN2_MOUSE]	7	113.146	80.7787	8.75	0.972547	1.03479	1.11106	0.97871	1.00989	1.06354
912	Q8BR92	Paralemmin-2 OS=Mus musculus GN=Palm2 PE=1 SV=1 - [PALM2_MOUSE]	7	42.0693	80.7295	22.87	1.0258	1.04057	0.941048	0.995412	1.02184	0.908735
913	Q99KQ4	Nicotinamide phosphoribosyltransferase OS=Mus musculus GN=Nampt PE=1 SV=1 - [NAMPT_MOUSE]	7	55.4125	80.5485	15.68	0.99861	1.02898	1.01626	1.01289	1.00192	1.03117
914	P30416	Peptidyl-prolyl cis-trans isomerase FKBP4 OS=Mus musculus GN=Fkbp4 PE=1 SV=5 - [FKBP4_MOUSE]	7	51.5399	80.4858	15.5	1.15236	0.941289	0.850081	1.02103	0.933954	1.01139
915	P48318	Glutamate decarboxylase 1 OS=Mus musculus GN=Gad1 PE=1 SV=2 - [DCE1_MOUSE]	7	66.6055	80.2892	15.85	0.976059	1.06322	1.0929	0.998103	0.931099	1.05074
916	O54984	ATPase Asna1 OS=Mus musculus GN=Asna1 PE=1 SV=2 - [ASNA_MOUSE]	7	38.7974	75.9566	22.13	0.943911	1.0519	0.987056	0.980216	0.969903	0.958153
917	P31230	Aminoacyl tRNA synthase complex-interacting multifunctional protein 1 OS=Mus musculus GN=Aimp1 PE=1 SV=2 - [AIMP1_MOUSE]	7	33.9759	75.4813	25.81	1.04965	0.949856	1.03816	1.09152	1.03796	1.00027
918	A2AJA9	Uncharacterized protein C9orf172 homolog OS=Mus musculus GN=Gm996 PE=1 SV=1 - [CI172_MOUSE]	7	107.119	73.69	9.24	0.946101	0.890821	0.914153	0.870124	1.0435	0.941649
919	O35621	Phosphomannomutase 1 OS=Mus musculus GN=Pmm1 PE=1 SV=1 - [PMM1_MOUSE]	7	29.7561	69.3049	28.63	1.0904	0.892981	0.91402	1.01853	0.964787	1.05105
920	P41105	60S ribosomal protein L28 OS=Mus musculus GN=Rpl28 PE=1 SV=2 - [RL28_MOUSE]	7	15.7237	67.263	37.23	1.06141	0.990392	1.06354	0.930057	1.11455	1.10008
921	Q9DB73	NADH-cytochrome b5 reductase 1 OS=Mus musculus GN=Cyb5r1 PE=1 SV=1 - [NB5R1_MOUSE]	7	34.1131	67.2309	32.13	1.0124	0.963479	0.936531	1.08218	1.01266	0.953229
922	P56959	RNA-binding protein FUS OS=Mus musculus GN=Fus PE=1 SV=1 - [FUS_MOUSE]	7	52.6415	66.6885	10.23	1.00379	1.01522	1.05506	0.897411	0.971812	1.06071
923	Q9D880	Mitochondrial import inner membrane translocase subunit TIM50 OS=Mus musculus GN=Timm50 PE=1 SV=1 - [TIM50_MOUSE]	7	39.7516	64.282	18.41	0.983907	0.95951	1.00635	0.965157	0.980443	1.04289
924	O54865	Guanylate cyclase soluble subunit beta-1 OS=Mus musculus GN=Gucy1b3 PE=1 SV=1 - [GCYB1_MOUSE]	7	70.5526	61.843	12.9	0.953425	1.10857	1.13171	0.996138	0.973323	0.994252
925	Q3UHD6	Sorting nexin-27 OS=Mus musculus GN=Snx27 PE=1 SV=2 - [SNX27_MOUSE]	7	60.9503	61.5081	13.54	0.902936	0.935138	1.05532	1.03863	1.04365	1.04094
926	P84099	60S ribosomal protein L19 OS=Mus musculus GN=Rpl19 PE=1 SV=1 - [RL19_MOUSE]	7	23.4512	59.2395	28.06	0.992924	0.931472	1.03434	0.884726	1.06305	1.12019
927	Q9D8U8	Sorting nexin-5 OS=Mus musculus GN=Snx5 PE=1 SV=1 - [SNX5_MOUSE]	7	46.7681	59.2348	20.54	1.0197	0.991282	0.859307	0.963411	1.02301	0.937133
928	O88741	Ganglioside-induced differentiation-associated protein 1 OS=Mus musculus GN=Gdap1 PE=1 SV=1 - [GDAP1_MOUSE]	7	41.2846	56.6477	17.88	1.00563	1.01329	1.07999	1.03985	0.95438	1.00785
929	Q9R0X4	Acyl-coenzyme A thioesterase 9, mitochondrial OS=Mus musculus GN=Acot9 PE=1 SV=1 - [ACOT9_MOUSE]	7	50.528	54.995	18	1.04545	0.926669	0.880009	1.01503	1.03451	0.946405
930	A2AG50	MAP7 domain-containing protein 2 OS=Mus musculus GN=Map7d2 PE=1 SV=1 - [MA7D2_MOUSE]	7	85.9968	54.4904	9.09	1.02177	0.984714	0.945272	0.972489	1.01603	1.11052
931	P63325	40S ribosomal protein S10 OS=Mus musculus GN=Rps10 PE=1 SV=1 - [RS10_MOUSE]	7	18.9038	52.5268	46.67	1.07069	0.866298	0.979726	0.942928	1.02927	1.01641
932	Q6ZWX6	Eukaryotic translation initiation factor 2 subunit 1 OS=Mus musculus GN=Eif2s1 PE=1 SV=3 - [IF2A_MOUSE]	7	36.0854	51.5016	21.59	1.02392	0.949765	0.964102	0.988987	0.992483	0.963693
933	Q8BHL3	TBC1 domain family member 10B OS=Mus musculus GN=Tbc1d10b PE=1 SV=2 - [TB10B_MOUSE]	7	87.2206	49.0488	9.27	1.02461	0.971385	1.07131	0.935457	0.98722	1.04379
934	Q9D154	Leukocyte elastase inhibitor A OS=Mus musculus GN=Serpinb1a PE=1 SV=1 - [ILEUA_MOUSE]	7	42.5478	47.9426	15.83	1.06718	1.03601	0.923072	0.920911	1.14381	1.08878
935	Q8CCB4	Vacuolar protein sorting-associated protein 53 homolog OS=Mus musculus GN=Vps53 PE=1 SV=1 - [VPS53_MOUSE]	7	94.3631	47.6452	9.13	0.985541	0.954552	0.991929	1.03905	0.999112	0.974783
936	Q6ZWR6	Nesprin-1 OS=Mus musculus GN=Syne1 PE=1 SV=2 - [SYNE1_MOUSE]	7	1009.29	46.757	0.89	0.979214	1.12688	0.954679	1.07416	0.945577	0.960118
937	P16332	Methylmalonyl-CoA mutase, mitochondrial OS=Mus musculus GN=Mut PE=1 SV=2 - [MUTA_MOUSE]	7	82.7916	45.2105	10.29	1.03694	0.884881	0.938206	0.95422	0.957029	1.07608
938	Q9DCJ5	NADH dehydrogenase [ubiquinone] 1 alpha subcomplex subunit 8 OS=Mus musculus GN=Ndufa8 PE=1 SV=3 - [NDUA8_MOUSE]	7	19.9791	43.9656	47.09	0.912013	1.09088	1.26934	0.963229	0.918139	1.05783
939	Q99PV0	Pre-mRNA-processing-splicing factor 8 OS=Mus musculus GN=Prpf8 PE=1 SV=2 - [PRP8_MOUSE]	7	273.443	43.5134	3.13	0.848469	1.01876	1.18874	1.00944	1.03116	1.00767
940	P22315	Ferrochelatase, mitochondrial OS=Mus musculus GN=Fech PE=1 SV=2 - [HEMH_MOUSE]	7	47.1002	43.0675	20.71	0.986953	0.892056	1.00526	1.04535	1.00401	0.965051
941	Q99MK8	Beta-adrenergic receptor kinase 1 OS=Mus musculus GN=Grk2 PE=1 SV=2 - [ARBK1_MOUSE]	7	79.5875	42.3627	9.87	1.0624	1.00198	1.03979	0.950682	1.09032	1.06053
942	Q8BGD9	Eukaryotic translation initiation factor 4B OS=Mus musculus GN=Eif4b PE=1 SV=1 - [IF4B_MOUSE]	7	68.7992	37.1141	12.44	1.01912	0.983806	0.954971	1.07293	1.02051	1.00316
943	P0C7L0	WAS/WASL-interacting protein family member 3 OS=Mus musculus GN=Wipf3 PE=1 SV=1 - [WIPF3_MOUSE]	7	49.4221	36.4705	19.59	1.03965	1.0057	1.04413	1.01292	1.12535	1.05506
944	Q921M3	Splicing factor 3B subunit 3 OS=Mus musculus GN=Sf3b3 PE=1 SV=1 - [SF3B3_MOUSE]	7	135.465	36.4335	6.66	0.970524	0.99879	1.00968	1.0223	0.985428	0.98712
945	F8VPU2	FERM, ARHGEF and pleckstrin domain-containing protein 1 OS=Mus musculus GN=Farp1 PE=1 SV=1 - [FARP1_MOUSE]	7	118.801	36.2839	6.97	1.05823	1.03366	1.08187	0.981684	0.984843	1.00097
946	Q8CIE6	Coatomer subunit alpha OS=Mus musculus GN=Copa PE=1 SV=2 - [COPA_MOUSE]	7	138.344	35.9607	5.96	0.982431	0.978645	1.02351	0.984172	1.01632	1.00109
947	Q0KL02	Triple functional domain protein OS=Mus musculus GN=Trio PE=1 SV=3 - [TRIO_MOUSE]	7	347.643	35.7803	3.38	0.880499	1.0147	1.07864	0.973554	0.986788	0.987345
948	D3YXK2	Scaffold attachment factor B1 OS=Mus musculus GN=Safb PE=1 SV=2 - [SAFB1_MOUSE]	7	105.04	35.7658	9.39	0.934119	1.09762	1.15005	1.03149	0.941672	1.04765
949	Q9ES28	Rho guanine nucleotide exchange factor 7 OS=Mus musculus GN=Arhgef7 PE=1 SV=2 - [ARHG7_MOUSE]	7	96.9951	34.7456	8.47	1.06724	0.822846	0.855327	1.13526	0.956986	1.04738
950	P70414	Sodium/calcium exchanger 1 OS=Mus musculus GN=Slc8a1 PE=1 SV=1 - [NAC1_MOUSE]	7	107.967	32.2344	7.53	0.938903	0.994577	1.02316	0.987317	0.908792	0.92951
951	Q8R1B4	Eukaryotic translation initiation factor 3 subunit C OS=Mus musculus GN=Eif3c PE=1 SV=1 - [EIF3C_MOUSE]	7	105.465	32.1667	8.01	0.969568	1.0636	1.09567	0.966051	1.02499	1.0402
952	Q8VCT3	Aminopeptidase B OS=Mus musculus GN=Rnpep PE=1 SV=2 - [AMPB_MOUSE]	7	72.3701	29.5903	12.15	1.03664	0.946575	0.909717	1.01654	1.07734	1.1031
953	Q91YM2	Rho GTPase-activating protein 35 OS=Mus musculus GN=Arhgap35 PE=1 SV=3 - [RHG35_MOUSE]	7	170.285	21.54	5.47	1.05903	0.930596	0.867765	0.945994	1.06129	1.05997
954	Q9D6F9	Tubulin beta-4A chain OS=Mus musculus GN=Tubb4a PE=1 SV=3 - [TBB4A_MOUSE]	6	49.5539	11248.8	73.65	1.03646	1.03062	1.00254	1.02927	1.08398	1.03597
955	P68369	Tubulin alpha-1A chain OS=Mus musculus GN=Tuba1a PE=1 SV=1 - [TBA1A_MOUSE]	6	50.1036	9715.5	61.42	1.03663	1.02255	0.965443	0.972673	1.03047	1.01955
956	P68368	Tubulin alpha-4A chain OS=Mus musculus GN=Tuba4a PE=1 SV=1 - [TBA4A_MOUSE]	6	49.8924	8886.32	61.83	1.04873	1.0467	1.03477	0.935518	1.06315	1.0378
957	P62880	Guanine nucleotide-binding protein G(I)/G(S)/G(T) subunit beta-2 OS=Mus musculus GN=Gnb2 PE=1 SV=3 - [GBB2_MOUSE]	6	37.3071	2284.46	51.76	1.02675	0.968681	1.10739	0.922836	0.949638	1.07122
958	P63011	Ras-related protein Rab-3A OS=Mus musculus GN=Rab3a PE=1 SV=1 - [RAB3A_MOUSE]	6	24.9541	1303.21	65	0.96803	1.16836	1.19917	1.07621	0.863386	0.95735
959	P43274	Histone H1.4 OS=Mus musculus GN=Hist1h1e PE=1 SV=2 - [H14_MOUSE]	6	21.964	803.542	54.34	0.916502	1.12966	0.993134	0.86647	1.01394	1.13309
960	P49312	Heterogeneous nuclear ribonucleoprotein A1 OS=Mus musculus GN=Hnrnpa1 PE=1 SV=2 - [ROA1_MOUSE]	6	34.1753	550.878	26.88	0.95584	1.04738	1.08135	0.999376	0.953494	1.15014
961	P61205	ADP-ribosylation factor 3 OS=Mus musculus GN=Arf3 PE=2 SV=2 - [ARF3_MOUSE]	6	20.5877	519.354	48.07	0.98005	0.972814	0.979071	1.11218	0.979958	0.961097
962	P58771	Tropomyosin alpha-1 chain OS=Mus musculus GN=Tpm1 PE=1 SV=1 - [TPM1_MOUSE]	6	32.6607	505.77	34.51	0.961773	1.00884	0.991271	0.951608	0.960845	0.991737
963	P61027	Ras-related protein Rab-10 OS=Mus musculus GN=Rab10 PE=1 SV=1 - [RAB10_MOUSE]	6	22.5266	419.245	42	0.95414	0.969234	1.00786	0.967254	1.04045	0.968988
964	Q68FL4	Putative adenosylhomocysteinase 3 OS=Mus musculus GN=Ahcyl2 PE=1 SV=1 - [SAHH3_MOUSE]	6	66.8566	374.929	31.16	1.00742	1.0297	0.988771	1.05005	1.09656	1.0044
965	Q80XI4	Phosphatidylinositol 5-phosphate 4-kinase type-2 beta OS=Mus musculus GN=Pip4k2b PE=1 SV=1 - [PI42B_MOUSE]	6	47.2888	357.269	27.88	0.968412	1.08531	0.9768	0.963921	0.928789	1.03906
966	P61226	Ras-related protein Rap-2b OS=Mus musculus GN=Rap2b PE=1 SV=1 - [RAP2B_MOUSE]	6	20.4912	355.321	48.09	0.90662	1.02245	1.03325	0.996624	0.938738	0.969314
967	Q501J6	Probable ATP-dependent RNA helicase DDX17 OS=Mus musculus GN=Ddx17 PE=1 SV=1 - [DDX17_MOUSE]	6	72.354	353.514	20.77	0.980548	1.00967	1.05694	0.99183	0.905847	1.01152
968	P23242	Gap junction alpha-1 protein OS=Mus musculus GN=Gja1 PE=1 SV=2 - [CXA1_MOUSE]	6	42.9769	338.874	21.2	1.04659	0.978513	1.04992	0.993292	0.963235	1.0976
969	Q9QXV0	ProSAAS OS=Mus musculus GN=Pcsk1n PE=1 SV=2 - [PCSK1_MOUSE]	6	27.2537	328.955	22.48	1.07675	0.89141	0.710563	1.0334	1.04962	1.06624
970	P97315	Cysteine and glycine-rich protein 1 OS=Mus musculus GN=Csrp1 PE=1 SV=3 - [CSRP1_MOUSE]	6	20.5698	317.053	46.63	1.1069	1.04159	1.07043	0.934708	1.09988	1.22531
971	P52503	NADH dehydrogenase [ubiquinone] iron-sulfur protein 6, mitochondrial OS=Mus musculus GN=Ndufs6 PE=1 SV=2 - [NDUS6_MOUSE]	6	13.0117	304.03	60.34	0.995828	0.989325	1.16446	1.04251	0.904385	1.01115
972	Q8K021	Secretory carrier-associated membrane protein 1 OS=Mus musculus GN=Scamp1 PE=1 SV=1 - [SCAM1_MOUSE]	6	38.0038	302.174	23.37	1.03379	0.995828	1.08035	1.03486	1.01492	0.939672
973	Q9JM76	Actin-related protein 2/3 complex subunit 3 OS=Mus musculus GN=Arpc3 PE=1 SV=3 - [ARPC3_MOUSE]	6	20.5113	294.16	26.97	1.03283	0.971816	0.931135	1.02369	1.04347	0.994824
974	Q9DB41	Mitochondrial glutamate carrier 2 OS=Mus musculus GN=Slc25a18 PE=1 SV=4 - [GHC2_MOUSE]	6	34.1438	292.376	24.69	0.970716	1.07824	0.979397	0.943651	0.983358	0.939596
975	P15532	Nucleoside diphosphate kinase A OS=Mus musculus GN=Nme1 PE=1 SV=1 - [NDKA_MOUSE]	6	17.1969	291.911	68.42	1.16273	0.956455	0.881706	1.22038	1.12719	0.974136
976	P62827	GTP-binding nuclear protein Ran OS=Mus musculus GN=Ran PE=1 SV=3 - [RAN_MOUSE]	6	24.4076	276.397	32.41	1.08291	1.0417	1.08855	1.06554	0.999209	1.02455
977	Q9D3A9	Protein tweety homolog 1 OS=Mus musculus GN=Ttyh1 PE=1 SV=1 - [TTYH1_MOUSE]	6	49.0012	260.244	15.56	0.894944	1.01726	1.0334	1.14582	0.901391	0.87761
978	Q63844	Mitogen-activated protein kinase 3 OS=Mus musculus GN=Mapk3 PE=1 SV=5 - [MK03_MOUSE]	6	43.0391	254.305	34.21	0.998711	0.98711	0.859966	0.973324	1.05265	1.00293
979	O70172	Phosphatidylinositol 5-phosphate 4-kinase type-2 alpha OS=Mus musculus GN=Pip4k2a PE=1 SV=1 - [PI42A_MOUSE]	6	46.1225	253.027	28.15	1.10161	0.923572	0.930815	0.934346	0.998297	1.03221
980	P27661	Histone H2AX OS=Mus musculus GN=H2afx PE=1 SV=2 - [H2AX_MOUSE]	6	15.1334	237.421	39.86	0.886861	1.09974	1.22854	0.817954	0.934113	1.11593
981	Q8BHC1	Ras-related protein Rab-39B OS=Mus musculus GN=Rab39b PE=1 SV=1 - [RB39B_MOUSE]	6	24.6207	232.879	34.74	0.976866	0.994096	1.06592	1.09051	0.857737	0.937239
982	Q8CBW3	Abl interactor 1 OS=Mus musculus GN=Abi1 PE=1 SV=3 - [ABI1_MOUSE]	6	52.2553	230.117	22.25	1.04979	0.959444	0.94086	1.0095	1.05624	1.0231
983	Q9CPQ8	ATP synthase subunit g, mitochondrial OS=Mus musculus GN=Atp5l PE=1 SV=1 - [ATP5L_MOUSE]	6	11.4172	223.175	55.34	0.959341	1.08209	1.09577	1.04965	0.937998	1.02805
984	P23506	Protein-L-isoaspartate(D-aspartate) O-methyltransferase OS=Mus musculus GN=Pcmt1 PE=1 SV=3 - [PIMT_MOUSE]	6	24.6186	222.449	26.43	1.07752	0.958787	0.987443	0.922297	1.02792	1.04073
985	Q9DC70	NADH dehydrogenase [ubiquinone] iron-sulfur protein 7, mitochondrial OS=Mus musculus GN=Ndufs7 PE=1 SV=1 - [NDUS7_MOUSE]	6	24.6668	213.32	21.88	0.931017	1.01392	1.10913	0.989963	0.976077	0.971964
986	Q9DAS9	Guanine nucleotide-binding protein G(I)/G(S)/G(O) subunit gamma-12 OS=Mus musculus GN=Gng12 PE=1 SV=3 - [GBG12_MOUSE]	6	7.99212	212.607	79.17	0.991982	1.02685	1.03713	0.854952	1.07011	0.988126
987	Q64487	Receptor-type tyrosine-protein phosphatase delta OS=Mus musculus GN=Ptprd PE=1 SV=3 - [PTPRD_MOUSE]	6	214.274	210.042	7.79	1.01123	1.01714	0.962669	1.00551	1.03722	0.979923
988	P97450	ATP synthase-coupling factor 6, mitochondrial OS=Mus musculus GN=Atp5j PE=1 SV=1 - [ATP5J_MOUSE]	6	12.4886	208.581	50	0.993543	1.16458	1.23258	0.982115	0.990209	1.07075
989	P62900	60S ribosomal protein L31 OS=Mus musculus GN=Rpl31 PE=1 SV=1 - [RL31_MOUSE]	6	14.4539	204.591	44.8	1.01718	0.984532	1.0063	0.965898	1.03738	1.04089
990	Q8BYM5	Neuroligin-3 OS=Mus musculus GN=Nlgn3 PE=1 SV=2 - [NLGN3_MOUSE]	6	91.1045	204.166	11.39	1.00819	0.921434	0.924927	1.05634	1.0157	0.919556
991	Q99J99	3-mercaptopyruvate sulfurtransferase OS=Mus musculus GN=Mpst PE=1 SV=3 - [THTM_MOUSE]	6	33.0025	203.525	25.59	1.19794	0.775132	0.940858	0.899573	1.13234	0.97336
992	P57776	Elongation factor 1-delta OS=Mus musculus GN=Eef1d PE=1 SV=3 - [EF1D_MOUSE]	6	31.2739	200.912	22.06	1.17153	0.955988	0.932513	0.924235	1.06295	1.03655
993	Q91VR8	Protein BRICK1 OS=Mus musculus GN=Brk1 PE=1 SV=1 - [BRK1_MOUSE]	6	8.75546	200.202	65.33	1.0644	0.956179	0.996605	0.986912	1.02774	0.976626
994	Q80UW2	F-box only protein 2 OS=Mus musculus GN=Fbxo2 PE=1 SV=1 - [FBX2_MOUSE]	6	33.6551	196.702	23.91	1.08742	1.00276	0.961876	1.04499	0.956321	0.923595
995	Q63810	Calcineurin subunit B type 1 OS=Mus musculus GN=Ppp3r1 PE=1 SV=3 - [CANB1_MOUSE]	6	19.2876	195.722	35.29	1.00758	1.19411	1.10085	1.1336	1.0276	0.936803
996	P84096	Rho-related GTP-binding protein RhoG OS=Mus musculus GN=Rhog PE=1 SV=1 - [RHOG_MOUSE]	6	21.2949	195.298	40.84	0.985945	1.11579	1.03994	0.886091	1.19565	1.16793
997	P04925	Major prion protein OS=Mus musculus GN=Prnp PE=1 SV=2 - [PRIO_MOUSE]	6	27.9595	193.447	20.47	0.925876	1.09382	1.1214	0.970646	0.982277	0.995731
998	P24288	Branched-chain-amino-acid aminotransferase, cytosolic OS=Mus musculus GN=Bcat1 PE=1 SV=2 - [BCAT1_MOUSE]	6	42.7636	186.442	16.06	0.982858	1.07789	1.00834	1.02764	0.937372	0.970818
999	Q9DBG6	Dolichyl-diphosphooligosaccharide--protein glycosyltransferase subunit 2 OS=Mus musculus GN=Rpn2 PE=1 SV=1 - [RPN2_MOUSE]	6	69.02	182.067	14.74	0.878982	1.3855	1.04049	1.11347	0.994054	0.958277
1000	Q9D898	Actin-related protein 2/3 complex subunit 5-like protein OS=Mus musculus GN=Arpc5l PE=1 SV=1 - [ARP5L_MOUSE]	6	16.9698	181.043	43.14	1.03137	1.01807	0.952089	0.894168	1.00626	0.939716
1001	Q80Z24	Neuronal growth regulator 1 OS=Mus musculus GN=Negr1 PE=1 SV=1 - [NEGR1_MOUSE]	6	37.876	180.364	17.53	0.897331	1.04357	0.998896	0.891979	0.958223	0.932801
1002	O88531	Palmitoyl-protein thioesterase 1 OS=Mus musculus GN=Ppt1 PE=1 SV=2 - [PPT1_MOUSE]	6	34.4674	178.106	22.55	0.946245	1.0457	1.31025	0.892754	1.11629	1.27067
1003	Q8CBY8	Dynactin subunit 4 OS=Mus musculus GN=Dctn4 PE=1 SV=1 - [DCTN4_MOUSE]	6	53.0231	176.835	15.42	1.09316	1.00112	0.952746	0.978936	1.01909	1.02157
1004	P15209	BDNF/NT-3 growth factors receptor OS=Mus musculus GN=Ntrk2 PE=1 SV=1 - [NTRK2_MOUSE]	6	92.0741	176.311	12.91	0.930825	1.03437	0.968658	0.940579	0.955953	1.07671
1005	O55022	Membrane-associated progesterone receptor component 1 OS=Mus musculus GN=Pgrmc1 PE=1 SV=4 - [PGRC1_MOUSE]	6	21.6808	173.032	27.69	1.00481	0.966092	0.968566	0.996422	0.932541	0.863031
1006	Q9Z0H4	CUGBP Elav-like family member 2 OS=Mus musculus GN=Celf2 PE=1 SV=1 - [CELF2_MOUSE]	6	54.2361	169.222	14.96	0.925167	0.984215	1.00093	0.993916	0.922503	0.96601
1007	Q9CQX2	Cytochrome b5 type B OS=Mus musculus GN=Cyb5b PE=1 SV=1 - [CYB5B_MOUSE]	6	16.3078	168.305	29.45	0.985021	0.968921	0.965985	0.996471	0.963175	0.979975
1008	Q9JI46	Diphosphoinositol polyphosphate phosphohydrolase 1 OS=Mus musculus GN=Nudt3 PE=1 SV=1 - [NUDT3_MOUSE]	6	19.0175	164.928	50	1.16277	0.887237	0.820322	0.8914	1.1717	0.980334
1009	Q9CZ42	ATP-dependent (S)-NAD(P)H-hydrate dehydratase OS=Mus musculus GN=Naxd PE=1 SV=1 - [NNRD_MOUSE]	6	36.6941	164.795	22.16	1.05679	0.986901	0.892203	1.00464	1.05219	0.950386
1010	P62830	60S ribosomal protein L23 OS=Mus musculus GN=Rpl23 PE=1 SV=1 - [RL23_MOUSE]	6	14.8561	164.576	50	1.08071	0.97248	1.08216	0.980962	0.974729	1.10229
1011	Q8R016	Bleomycin hydrolase OS=Mus musculus GN=Blmh PE=1 SV=1 - [BLMH_MOUSE]	6	52.4769	160.877	14.73	1.08123	0.951637	0.910296	1.10839	0.962127	0.903961
1012	P32037	Solute carrier family 2, facilitated glucose transporter member 3 OS=Mus musculus GN=Slc2a3 PE=1 SV=1 - [GTR3_MOUSE]	6	53.444	159.549	11.76	0.818223	1.18844	1.11896	0.933102	0.927627	1.01707
1013	P29391	Ferritin light chain 1 OS=Mus musculus GN=Ftl1 PE=1 SV=2 - [FRIL1_MOUSE]	6	20.7895	159.207	39.89	1.10706	0.940886	0.897292	0.875705	1.02831	1.10376
1014	Q9R1P0	Proteasome subunit alpha type-4 OS=Mus musculus GN=Psma4 PE=1 SV=1 - [PSA4_MOUSE]	6	29.4522	157.651	19.54	1.03096	1.01438	1.08007	1.0998	1.00864	1.01294
1015	P54775	26S proteasome regulatory subunit 6B OS=Mus musculus GN=Psmc4 PE=1 SV=2 - [PRS6B_MOUSE]	6	47.3786	154.018	18.66	0.96805	1.0441	1.00249	0.986502	0.983237	1.0088
1016	Q9EPL8	Importin-7 OS=Mus musculus GN=Ipo7 PE=1 SV=2 - [IPO7_MOUSE]	6	119.41	152.558	5.97	0.911777	1.0265	1.02481	0.969038	1.01491	0.94798
1017	Q8BLR2	Copine-4 OS=Mus musculus GN=Cpne4 PE=1 SV=1 - [CPNE4_MOUSE]	6	62.368	151.837	13.29	1.00908	0.981601	0.960228	0.97171	1.02492	0.995745
1018	Q9CXS4	Centromere protein V OS=Mus musculus GN=Cenpv PE=1 SV=2 - [CENPV_MOUSE]	6	27.5238	150.293	30.56	0.997029	1.0808	1.16351	0.934188	0.979102	1.11151
1019	Q3TC72	Fumarylacetoacetate hydrolase domain-containing protein 2A OS=Mus musculus GN=Fahd2 PE=1 SV=1 - [FAHD2_MOUSE]	6	34.6681	149.92	30.35	1.08769	0.859804	0.844472	1.00591	0.98118	0.967845
1020	Q9WUC3	Lymphocyte antigen 6H OS=Mus musculus GN=Ly6h PE=1 SV=2 - [LY6H_MOUSE]	6	14.6591	148.22	33.09	0.861936	1.0461	1.06975	0.97661	1.01053	0.897199
1021	P62301	40S ribosomal protein S13 OS=Mus musculus GN=Rps13 PE=1 SV=2 - [RS13_MOUSE]	6	17.2117	147.009	33.11	1.02098	0.961631	0.956487	0.976525	1.04713	1.02797
1022	P84309	Adenylate cyclase type 5 OS=Mus musculus GN=Adcy5 PE=1 SV=2 - [ADCY5_MOUSE]	6	139.032	145.654	4.99	0.815137	0.795253	0.730885	0.875766	1.07663	0.965192
1023	Q8BHZ0	Protein FAM49A OS=Mus musculus GN=Fam49a PE=1 SV=1 - [FA49A_MOUSE]	6	37.3187	145.302	26.63	1.07795	1.00884	0.982426	1.02424	1.00919	1.04171
1024	Q8R0S4	Voltage-dependent L-type calcium channel subunit beta-4 OS=Mus musculus GN=Cacnb4 PE=1 SV=2 - [CACB4_MOUSE]	6	57.9144	143.834	22.16	0.956662	1.05434	1.00853	0.90008	0.996945	0.987567
1025	Q8C522	Endonuclease domain-containing 1 protein OS=Mus musculus GN=Endod1 PE=1 SV=2 - [ENDD1_MOUSE]	6	55.2267	142.884	13.97	1.06507	1.04808	0.914142	0.885268	1.05215	1.00673
1026	Q9CQC7	NADH dehydrogenase [ubiquinone] 1 beta subcomplex subunit 4 OS=Mus musculus GN=Ndufb4 PE=1 SV=3 - [NDUB4_MOUSE]	6	15.072	142.533	51.16	1.07025	0.950469	1.08788	0.924627	1.03937	1.04918
1027	P05480	Neuronal proto-oncogene tyrosine-protein kinase Src OS=Mus musculus GN=Src PE=1 SV=4 - [SRC_MOUSE]	6	60.6065	141.395	15.9	0.8945	1.09113	1.07089	1.08375	0.894215	1.0096
1028	Q9CQM9	Glutaredoxin-3 OS=Mus musculus GN=Glrx3 PE=1 SV=1 - [GLRX3_MOUSE]	6	37.7544	139.745	20.47	1.04048	0.981549	0.980999	1.00741	1.10671	0.989977
1029	Q9D358	Low molecular weight phosphotyrosine protein phosphatase OS=Mus musculus GN=Acp1 PE=1 SV=3 - [PPAC_MOUSE]	6	18.1799	139.22	36.71	1.03994	0.96331	1.0053	1.07413	1.03084	0.968018
1030	P26516	26S proteasome non-ATPase regulatory subunit 7 OS=Mus musculus GN=Psmd7 PE=1 SV=2 - [PSMD7_MOUSE]	6	36.5172	137.131	18.69	0.952036	1.08737	0.995232	0.972934	0.979654	1.01777
1031	P63158	High mobility group protein B1 OS=Mus musculus GN=Hmgb1 PE=1 SV=2 - [HMGB1_MOUSE]	6	24.8782	135.68	35.35	1.00646	1.11318	1.10025	1.00751	0.939876	1.07501
1032	Q63912	Oligodendrocyte-myelin glycoprotein OS=Mus musculus GN=Omg PE=1 SV=1 - [OMGP_MOUSE]	6	49.252	135.57	13.64	0.876831	1.04522	1.10254	0.942244	1.04326	1.03048
1033	P24549	Retinal dehydrogenase 1 OS=Mus musculus GN=Aldh1a1 PE=1 SV=5 - [AL1A1_MOUSE]	6	54.4328	133.896	17.76	1.07786	0.870724	0.815677	1.02814	1.00641	0.994365
1034	Q78ZA7	Nucleosome assembly protein 1-like 4 OS=Mus musculus GN=Nap1l4 PE=1 SV=1 - [NP1L4_MOUSE]	6	42.6529	133.598	23.73	1.0154	0.966315	1.00225	1.13623	0.986908	0.973198
1035	O89112	LanC-like protein 1 OS=Mus musculus GN=Lancl1 PE=1 SV=1 - [LANC1_MOUSE]	6	45.3116	133.308	16.54	1.02477	0.957778	0.975953	1.00548	0.958447	1.02089
1036	Q9WUK2	Eukaryotic translation initiation factor 4H OS=Mus musculus GN=Eif4h PE=1 SV=3 - [IF4H_MOUSE]	6	27.3244	130.554	31.85	0.933776	0.913444	0.928669	0.885783	1.05205	1.06628
1037	Q4VAE3	Transmembrane protein 65 OS=Mus musculus GN=Tmem65 PE=1 SV=1 - [TMM65_MOUSE]	6	24.9021	126.76	28.21	0.949502	1.11068	1.17286	1.05386	0.960174	1.00928
1038	Q9Z130	Heterogeneous nuclear ribonucleoprotein D-like OS=Mus musculus GN=Hnrnpdl PE=1 SV=1 - [HNRDL_MOUSE]	6	33.5381	126.61	20.6	0.964503	1.04033	1.20975	0.901829	0.980289	1.1068
1039	Q9CPQ1	Cytochrome c oxidase subunit 6C OS=Mus musculus GN=Cox6c PE=1 SV=3 - [COX6C_MOUSE]	6	8.46351	123.766	61.84	0.903359	1.07064	1.13077	0.955058	0.975565	1.04878
1040	Q8BJU0	Small glutamine-rich tetratricopeptide repeat-containing protein alpha OS=Mus musculus GN=Sgta PE=1 SV=2 - [SGTA_MOUSE]	6	34.3009	122.583	23.17	1.02902	0.963861	0.972422	1.06472	0.975671	0.944705
1041	Q9R1V7	Disintegrin and metalloproteinase domain-containing protein 23 OS=Mus musculus GN=Adam23 PE=1 SV=1 - [ADA23_MOUSE]	6	91.4884	121.333	7.84	1.00566	1.09429	1.20676	0.997346	0.990446	1.06195
1042	Q91YR1	Twinfilin-1 OS=Mus musculus GN=Twf1 PE=1 SV=2 - [TWF1_MOUSE]	6	40.0545	117.714	22	0.984453	1.05674	0.918762	1.05868	1.08562	0.991911
1043	P49722	Proteasome subunit alpha type-2 OS=Mus musculus GN=Psma2 PE=1 SV=3 - [PSA2_MOUSE]	6	25.9103	117.207	35.47	1.05625	0.944506	0.970227	0.90752	1.02037	1.07211
1044	Q9Z2W0	Aspartyl aminopeptidase OS=Mus musculus GN=Dnpep PE=1 SV=2 - [DNPEP_MOUSE]	6	52.1738	117.164	15.86	1.1154	0.993973	0.888411	1.00286	1.02274	1.13082
1045	P45591	Cofilin-2 OS=Mus musculus GN=Cfl2 PE=1 SV=1 - [COF2_MOUSE]	6	18.6978	116.019	53.61	1.06722	1.02307	1.06446	1.05131	0.975706	1.01377
1046	P21460	Cystatin-C OS=Mus musculus GN=Cst3 PE=1 SV=2 - [CYTC_MOUSE]	6	15.5208	115.688	46.43	1.24109	0.998014	0.873367	1.16525	0.887955	0.976982
1047	Q91VE0	Long-chain fatty acid transport protein 4 OS=Mus musculus GN=Slc27a4 PE=1 SV=1 - [S27A4_MOUSE]	6	72.2722	114.13	12.29	0.905148	0.993612	1.06869	0.939123	0.908315	0.892561
1048	Q9CQI6	Coactosin-like protein OS=Mus musculus GN=Cotl1 PE=1 SV=3 - [COTL1_MOUSE]	6	15.934	113.801	35.92	1.082	0.997584	0.906904	0.98032	1.11918	1.08591
1049	P62869	Elongin-B OS=Mus musculus GN=Elob PE=1 SV=1 - [ELOB_MOUSE]	6	13.1616	113.689	55.93	1.07985	1.00345	0.984295	0.967425	1.09537	1.03381
1050	Q8C0C7	Phenylalanine--tRNA ligase alpha subunit OS=Mus musculus GN=Farsa PE=1 SV=1 - [SYFA_MOUSE]	6	57.5628	113.606	13.98	1.08961	0.963802	0.973929	0.911673	1.04314	1.06387
1051	O70251	Elongation factor 1-beta OS=Mus musculus GN=Eef1b PE=1 SV=5 - [EF1B_MOUSE]	6	24.6782	112.219	25.78	1.09875	1.00863	1.10549	0.939541	0.974592	1.07723
1052	Q8C0E2	Vacuolar protein sorting-associated protein 26B OS=Mus musculus GN=Vps26b PE=1 SV=1 - [VP26B_MOUSE]	6	39.1002	111.995	22.02	0.997342	0.998005	0.970935	1.03557	1.02451	0.994884
1053	Q9CQ60	6-phosphogluconolactonase OS=Mus musculus GN=Pgls PE=1 SV=1 - [6PGL_MOUSE]	6	27.2374	111.85	30.35	0.989397	0.974687	0.965339	1.00366	0.956127	1.02055
1054	Q9Z0S1	3'(2'),5'-bisphosphate nucleotidase 1 OS=Mus musculus GN=Bpnt1 PE=1 SV=2 - [BPNT1_MOUSE]	6	33.1751	110.949	19.48	1.07163	0.91374	0.862057	1.09907	1.04345	0.930687
1055	Q9QZB7	Actin-related protein 10 OS=Mus musculus GN=Actr10 PE=1 SV=2 - [ARP10_MOUSE]	6	46.1783	109.875	15.83	0.965243	0.969943	0.976351	1.04912	1.07647	0.989717
1056	Q9WVK4	EH domain-containing protein 1 OS=Mus musculus GN=Ehd1 PE=1 SV=1 - [EHD1_MOUSE]	6	60.5646	109.807	21.16	0.914823	1.03145	0.97033	1.06613	1.02075	1.0707
1057	Q9CQJ8	NADH dehydrogenase [ubiquinone] 1 beta subcomplex subunit 9 OS=Mus musculus GN=Ndufb9 PE=1 SV=3 - [NDUB9_MOUSE]	6	21.9697	109.586	37.43	0.973487	1.00688	1.09439	0.944496	1.04791	1.03821
1058	P23198	Chromobox protein homolog 3 OS=Mus musculus GN=Cbx3 PE=1 SV=2 - [CBX3_MOUSE]	6	20.8423	109.192	37.16	1.05276	1.10259	1.09534	0.902419	0.996549	1.08197
1059	Q9WUA2	Phenylalanine--tRNA ligase beta subunit OS=Mus musculus GN=Farsb PE=1 SV=2 - [SYFB_MOUSE]	6	65.6553	108.991	10.02	1.08469	1.00236	0.959343	0.985843	0.986687	1.00227
1060	P62849	40S ribosomal protein S24 OS=Mus musculus GN=Rps24 PE=1 SV=1 - [RS24_MOUSE]	6	15.4134	107.175	45.86	0.984733	0.93673	1.11504	0.998115	1.0661	1.11432
1061	O70310	Glycylpeptide N-tetradecanoyltransferase 1 OS=Mus musculus GN=Nmt1 PE=1 SV=1 - [NMT1_MOUSE]	6	56.8519	105.4	21.77	0.984627	1.07299	1.03643	1.02276	0.921596	1.05221
1062	Q3UUG6	TBC1 domain family member 24 OS=Mus musculus GN=Tbc1d24 PE=1 SV=2 - [TBC24_MOUSE]	6	63.195	104.69	11.76	0.979254	0.959655	0.989375	1.0465	1.05043	0.950771
1063	P58871	182 kDa tankyrase-1-binding protein OS=Mus musculus GN=Tnks1bp1 PE=1 SV=2 - [TB182_MOUSE]	6	181.714	102.906	4.59	0.889391	1.0003	0.990864	1.06121	0.945356	0.97986
1064	P14131	40S ribosomal protein S16 OS=Mus musculus GN=Rps16 PE=1 SV=4 - [RS16_MOUSE]	6	16.435	102.886	36.99	1.03959	0.977694	1.06632	0.971168	0.970568	1.06127
1065	Q8C437	PEX5-related protein OS=Mus musculus GN=Pex5l PE=1 SV=2 - [PEX5R_MOUSE]	6	63.0957	101.398	14.46	1.07693	0.965322	0.917848	0.988561	0.977125	0.915012
1066	Q8BLF1	Neutral cholesterol ester hydrolase 1 OS=Mus musculus GN=Nceh1 PE=1 SV=1 - [NCEH1_MOUSE]	6	45.7107	98.0168	14.95	0.911277	1.2181	1.14357	1.03856	1.00354	1.02745
1067	Q80TL0	Protein phosphatase 1E OS=Mus musculus GN=Ppm1e PE=1 SV=2 - [PPM1E_MOUSE]	6	83.3666	97.0423	9.48	0.916621	0.97285	1.02414	1.18395	1.01236	0.924557
1068	Q14BI2	Metabotropic glutamate receptor 2 OS=Mus musculus GN=Grm2 PE=1 SV=2 - [GRM2_MOUSE]	6	95.8256	96.9184	9.86	0.883131	1.07341	1.24366	0.896985	0.924609	1.07128
1069	Q9Z2I8	Succinate--CoA ligase [GDP-forming] subunit beta, mitochondrial OS=Mus musculus GN=Suclg2 PE=1 SV=3 - [SUCB2_MOUSE]	6	46.8107	95.141	17.78	1.07104	1.04577	1.07708	0.950631	1.01063	1.01656
1070	Q99LP6	GrpE protein homolog 1, mitochondrial OS=Mus musculus GN=Grpel1 PE=1 SV=1 - [GRPE1_MOUSE]	6	24.2919	94.5921	27.65	1.03201	1.05885	1.00864	1.03694	0.959292	0.966991
1071	Q60865	Caprin-1 OS=Mus musculus GN=Caprin1 PE=1 SV=2 - [CAPR1_MOUSE]	6	78.1208	93.5909	8.49	1.00291	0.983009	0.995268	1.04787	0.937985	1.00954
1072	P34914	Bifunctional epoxide hydrolase 2 OS=Mus musculus GN=Ephx2 PE=1 SV=2 - [HYES_MOUSE]	6	62.4746	89.6909	15.34	1.1261	0.956976	0.843113	0.961319	1.01499	1.03349
1073	P50171	Estradiol 17-beta-dehydrogenase 8 OS=Mus musculus GN=Hsd17b8 PE=1 SV=2 - [DHB8_MOUSE]	6	26.5716	89.2163	36.29	1.07545	0.855071	0.924667	1.06937	1.12637	0.984302
1074	Q3UTJ2	Sorbin and SH3 domain-containing protein 2 OS=Mus musculus GN=Sorbs2 PE=1 SV=2 - [SRBS2_MOUSE]	6	132.266	88.457	5.76	1.03048	0.93311	0.952161	0.95505	0.931529	0.876301
1075	P97447	Four and a half LIM domains protein 1 OS=Mus musculus GN=Fhl1 PE=1 SV=3 - [FHL1_MOUSE]	6	31.8668	88.0954	24.64	1.1407	0.940722	0.881182	0.960991	0.99758	0.991231
1076	P32067	Lupus La protein homolog OS=Mus musculus GN=Ssb PE=1 SV=1 - [LA_MOUSE]	6	47.727	84.5342	16.39	1.0091	1.04973	1.15091	0.987483	0.98675	1.02341
1077	Q3UH60	Disco-interacting protein 2 homolog B OS=Mus musculus GN=Dip2b PE=1 SV=1 - [DIP2B_MOUSE]	6	171.017	83.9811	5.91	1.16358	0.961289	0.956562	1.08965	0.990364	0.966087
1078	Q6P5U7	NACHT and WD repeat domain-containing protein 2 OS=Mus musculus GN=Nwd2 PE=1 SV=2 - [NWD2_MOUSE]	6	197.288	83.1764	4.08	0.953137	0.994948	0.988089	0.942152	1.04542	0.98799
1079	Q08642	Protein-arginine deiminase type-2 OS=Mus musculus GN=Padi2 PE=1 SV=2 - [PADI2_MOUSE]	6	76.2005	82.9277	9.81	1.06789	1.03801	0.889833	0.864293	1.16612	1.26659
1080	Q8R127	Saccharopine dehydrogenase-like oxidoreductase OS=Mus musculus GN=Sccpdh PE=1 SV=1 - [SCPDL_MOUSE]	6	47.0991	82.6676	15.15	0.994164	1.0391	1.01729	0.905415	1.01027	1.024
1081	Q80T41	Gamma-aminobutyric acid type B receptor subunit 2 OS=Mus musculus GN=Gabbr2 PE=1 SV=2 - [GABR2_MOUSE]	6	105.599	81.6875	6.6	0.96368	1.01351	1.089	0.992462	0.973071	0.900594
1082	Q9D2P8	Myelin-associated oligodendrocyte basic protein OS=Mus musculus GN=Mobp PE=1 SV=1 - [MOBP_MOUSE]	6	19.185	81.453	26.47	0.849408	1.12553	1.21749	0.703316	1.20315	1.36439
1083	P62751	60S ribosomal protein L23a OS=Mus musculus GN=Rpl23a PE=1 SV=1 - [RL23A_MOUSE]	6	17.6841	81.0393	39.74	0.977167	1.00292	1.08136	0.960421	1.04271	1.06127
1084	Q99JI4	26S proteasome non-ATPase regulatory subunit 6 OS=Mus musculus GN=Psmd6 PE=1 SV=1 - [PSMD6_MOUSE]	6	45.5072	80.9901	17.74	0.951767	1.01161	0.952215	1.03003	1.01517	0.965224
1085	Q8BKC5	Importin-5 OS=Mus musculus GN=Ipo5 PE=1 SV=3 - [IPO5_MOUSE]	6	123.511	80.1597	7.2	0.93665	1.01486	0.997349	1.25414	0.956102	0.92869
1086	Q80TV8	CLIP-associating protein 1 OS=Mus musculus GN=Clasp1 PE=1 SV=2 - [CLAP1_MOUSE]	6	169.123	79.4885	6.64	0.947473	0.910057	0.913091	1.11124	0.866993	0.964867
1087	P15116	Cadherin-2 OS=Mus musculus GN=Cdh2 PE=1 SV=2 - [CADH2_MOUSE]	6	99.7344	79.0515	8.72	0.966511	1.1439	1.10038	0.944344	0.890126	0.98361
1088	Q9ERK4	Exportin-2 OS=Mus musculus GN=Cse1l PE=1 SV=1 - [XPO2_MOUSE]	6	110.384	79.0409	6.59	1.0594	0.928227	0.966273	0.988389	1.0651	1.096
1089	Q9R1R2	Tripartite motif-containing protein 3 OS=Mus musculus GN=Trim3 PE=1 SV=1 - [TRIM3_MOUSE]	6	80.7239	78.4294	11.69	1.04742	0.917977	1.03138	0.919186	1.03177	1.07328
1090	P35505	Fumarylacetoacetase OS=Mus musculus GN=Fah PE=1 SV=2 - [FAAA_MOUSE]	6	46.146	76.0804	17.18	1.36859	0.931792	0.782546	0.974521	0.840957	1.07138
1091	P62192	26S proteasome regulatory subunit 4 OS=Mus musculus GN=Psmc1 PE=1 SV=1 - [PRS4_MOUSE]	6	49.1537	75.1727	20	1.01186	0.975546	0.988339	0.97663	1.00942	0.970618
1092	Q61024	Asparagine synthetase [glutamine-hydrolyzing] OS=Mus musculus GN=Asns PE=1 SV=3 - [ASNS_MOUSE]	6	64.2415	74.4064	11.23	1.05662	0.942636	0.945139	0.893174	1.10064	1.09385
1093	Q9DAR7	m7GpppX diphosphatase OS=Mus musculus GN=Dcps PE=1 SV=1 - [DCPS_MOUSE]	6	38.9643	73.7203	21.6	1.02696	0.959148	0.972418	0.894789	0.987403	0.938522
1094	Q99LD8	N(G),N(G)-dimethylarginine dimethylaminohydrolase 2 OS=Mus musculus GN=Ddah2 PE=1 SV=1 - [DDAH2_MOUSE]	6	29.6273	72.7428	31.23	1.06058	1.01746	0.874033	1.02533	0.991418	0.987963
1095	Q9Z2U0	Proteasome subunit alpha type-7 OS=Mus musculus GN=Psma7 PE=1 SV=1 - [PSA7_MOUSE]	6	27.8376	72.5859	26.61	1.07474	0.958383	0.977437	0.949326	1.00641	1.02824
1096	Q9D2V7	Coronin-7 OS=Mus musculus GN=Coro7 PE=1 SV=2 - [CORO7_MOUSE]	6	100.749	72.0186	6.83	1.03686	0.919286	1.03435	0.935927	1.11588	1.00662
1097	Q921J2	GTP-binding protein Rheb OS=Mus musculus GN=Rheb PE=1 SV=1 - [RHEB_MOUSE]	6	20.4385	71.2156	32.07	0.892012	1.06788	1.08767	1.03911	1.06693	1.01243
1098	Q8QZS1	3-hydroxyisobutyryl-CoA hydrolase, mitochondrial OS=Mus musculus GN=Hibch PE=1 SV=1 - [HIBCH_MOUSE]	6	43.0102	71.0922	17.14	1.0222	0.97674	0.89554	1.09353	1.01109	1.02069
1099	Q9CZM2	60S ribosomal protein L15 OS=Mus musculus GN=Rpl15 PE=2 SV=4 - [RL15_MOUSE]	6	24.1311	69.3555	27.45	0.986957	0.962132	1.06279	0.99208	0.967604	1.01175
1100	P62196	26S proteasome regulatory subunit 8 OS=Mus musculus GN=Psmc5 PE=1 SV=1 - [PRS8_MOUSE]	6	45.5971	67.8614	21.43	1.04026	1.06825	1.03105	0.960243	0.931303	0.985844
1101	P56376	Acylphosphatase-1 OS=Mus musculus GN=Acyp1 PE=1 SV=2 - [ACYP1_MOUSE]	6	11.2338	66.6265	64.65	1.05548	0.873598	0.945034	1.0094	0.991771	1.06017
1102	Q8C2Q3	RNA-binding protein 14 OS=Mus musculus GN=Rbm14 PE=1 SV=1 - [RBM14_MOUSE]	6	69.406	66.3191	10.46	1.00472	1.00879	1.16682	0.976412	0.981602	1.08438
1103	O70252	Heme oxygenase 2 OS=Mus musculus GN=Hmox2 PE=1 SV=1 - [HMOX2_MOUSE]	6	35.7159	65.3969	18.41	0.969179	1.05868	1.07764	1.00536	0.969459	1.04795
1104	P97379	Ras GTPase-activating protein-binding protein 2 OS=Mus musculus GN=G3bp2 PE=1 SV=2 - [G3BP2_MOUSE]	6	54.0548	65.2976	15.98	0.970387	1.03242	1.01586	0.981081	1.0214	0.99461
1105	Q8BGD5	Carnitine O-palmitoyltransferase 1, brain isoform OS=Mus musculus GN=Cpt1c PE=1 SV=1 - [CPT1C_MOUSE]	6	89.9724	64.9056	8.9	0.992152	0.934375	0.897555	0.925177	1.02625	0.960184
1106	P24369	Peptidyl-prolyl cis-trans isomerase B OS=Mus musculus GN=Ppib PE=1 SV=2 - [PPIB_MOUSE]	6	23.6986	63.9587	27.31	1.02332	1.00246	1.11073	0.990403	1.02613	1.01928
1107	P49443	Protein phosphatase 1A OS=Mus musculus GN=Ppm1a PE=1 SV=1 - [PPM1A_MOUSE]	6	42.4057	63.8605	17.54	0.965365	1.00068	0.969689	0.96846	0.978133	1.02604
1108	P24270	Catalase OS=Mus musculus GN=Cat PE=1 SV=4 - [CATA_MOUSE]	6	59.7577	62.6081	13.09	0.915666	1.01117	0.997571	0.840533	1.11775	0.986362
1109	Q6KAR6	Exocyst complex component 3 OS=Mus musculus GN=Exoc3 PE=1 SV=2 - [EXOC3_MOUSE]	6	86.3996	61.1997	8.34	1.08407	1.01202	0.973967	0.991801	1.06575	1.01008
1110	Q4KUS2	Protein unc-13 homolog A OS=Mus musculus GN=Unc13a PE=1 SV=3 - [UN13A_MOUSE]	6	193.66	59.6316	3.62	0.867422	1.00995	1.0516	0.92603	1.03443	0.958042
1111	Q9D967	Magnesium-dependent phosphatase 1 OS=Mus musculus GN=Mdp1 PE=1 SV=1 - [MGDP1_MOUSE]	6	18.5706	59.5803	41.46	1.0148	0.883408	0.936219	0.999601	1.11424	1.07167
1112	P80560	Receptor-type tyrosine-protein phosphatase N2 OS=Mus musculus GN=Ptprn2 PE=1 SV=2 - [PTPR2_MOUSE]	6	111.427	57.6569	6.19	1.10941	0.828586	0.725324	1.02884	1.05921	0.941205
1113	Q9R0N7	Synaptotagmin-7 OS=Mus musculus GN=Syt7 PE=1 SV=1 - [SYT7_MOUSE]	6	45.4437	57.5286	16.38	0.976416	1.01148	1.09049	0.85826	0.89101	0.965932
1114	P07758	Alpha-1-antitrypsin 1-1 OS=Mus musculus GN=Serpina1a PE=1 SV=4 - [A1AT1_MOUSE]	6	45.9735	57.0231	12.11	1.08679	0.766947	0.736025	0.943642	1.03017	1.12777
1115	Q08460	Calcium-activated potassium channel subunit alpha-1 OS=Mus musculus GN=Kcnma1 PE=1 SV=2 - [KCMA1_MOUSE]	6	134.31	55.7407	6.29	0.974327	0.86858	0.917032	0.996378	0.969776	1.00629
1116	P45952	Medium-chain specific acyl-CoA dehydrogenase, mitochondrial OS=Mus musculus GN=Acadm PE=1 SV=1 - [ACADM_MOUSE]	6	46.4516	55.6682	14.49	1.05216	1.01628	1.00061	0.9134	1.06173	1.09747
1117	Q9D1R9	60S ribosomal protein L34 OS=Mus musculus GN=Rpl34 PE=1 SV=2 - [RL34_MOUSE]	6	13.2844	54.1986	41.88	1.0127	0.96349	1.06788	0.992519	1.03863	1.04537
1118	P32020	Non-specific lipid-transfer protein OS=Mus musculus GN=Scp2 PE=1 SV=3 - [NLTP_MOUSE]	6	59.0878	53.5877	10.79	1.00863	1.02253	1.0579	1.01479	1.00789	1.02851
1119	Q6ZQ18	Protein EFR3 homolog B OS=Mus musculus GN=Efr3b PE=1 SV=2 - [EFR3B_MOUSE]	6	92.3477	52.8192	9.06	0.968308	0.96519	1.02855	1.04872	0.971453	0.960464
1120	Q5DTY9	BTB/POZ domain-containing protein KCTD16 OS=Mus musculus GN=Kctd16 PE=1 SV=2 - [KCD16_MOUSE]	6	48.9414	52.377	14.52	1.01408	0.905793	0.96809	1.01601	0.9632	0.964302
1121	A2CG49	Kalirin OS=Mus musculus GN=Kalrn PE=1 SV=1 - [KALRN_MOUSE]	6	336.789	51.1379	3.34	0.952203	0.927845	1.01948	1.06638	0.863993	0.949627
1122	Q9D5V5	Cullin-5 OS=Mus musculus GN=Cul5 PE=1 SV=3 - [CUL5_MOUSE]	6	90.9163	50.9893	7.82	1.09803	1.03571	0.957106	0.968165	1.03783	1.05975
1123	P26369	Splicing factor U2AF 65 kDa subunit OS=Mus musculus GN=U2af2 PE=1 SV=3 - [U2AF2_MOUSE]	6	53.4832	50.7889	15.16	1.02951	1.03199	1.02348	0.93871	0.931808	0.9939
1124	Q8BFU3	RING finger protein 214 OS=Mus musculus GN=Rnf214 PE=1 SV=1 - [RN214_MOUSE]	6	73.5784	50.5679	10.63	1.0041	0.930708	0.913589	0.98713	1.06508	0.977255
1125	A2APX8	Sodium channel protein type 1 subunit alpha OS=Mus musculus GN=Scn1a PE=1 SV=1 - [SCN1A_MOUSE]	6	228.651	49.7948	4.73	0.842174	1.13973	0.999816	1.006	0.931529	0.937124
1126	O09131	Glutathione S-transferase omega-1 OS=Mus musculus GN=Gsto1 PE=1 SV=2 - [GSTO1_MOUSE]	6	27.4799	48.0763	23.75	1.05439	1.0399	0.956398	0.914017	1.0326	0.980434
1127	Q8BMK4	Cytoskeleton-associated protein 4 OS=Mus musculus GN=Ckap4 PE=1 SV=2 - [CKAP4_MOUSE]	6	63.6536	47.8189	11.13	1.09986	0.980239	0.936299	0.899584	1.04122	1.01319
1128	Q9Z0U1	Tight junction protein ZO-2 OS=Mus musculus GN=Tjp2 PE=1 SV=2 - [ZO2_MOUSE]	6	131.2	47.8018	5.57	0.974387	1.06794	1.07571	0.95784	1.08377	1.03972
1129	O55106	Striatin OS=Mus musculus GN=Strn PE=1 SV=2 - [STRN_MOUSE]	6	85.9127	46.9036	12.18	0.946515	0.95437	0.989334	0.921178	1.11996	0.977806
1130	O55091	Protein IMPACT OS=Mus musculus GN=Impact PE=1 SV=2 - [IMPCT_MOUSE]	6	36.2532	46.3088	20.13	1.08262	0.885242	0.795007	0.997442	0.965822	0.984025
1131	P29533	Vascular cell adhesion protein 1 OS=Mus musculus GN=Vcam1 PE=1 SV=1 - [VCAM1_MOUSE]	6	81.2655	46.08	8.93	1.03614	0.965532	0.941182	0.939197	0.943982	0.987469
1132	Q8CHT0	Delta-1-pyrroline-5-carboxylate dehydrogenase, mitochondrial OS=Mus musculus GN=Aldh4a1 PE=1 SV=3 - [AL4A1_MOUSE]	6	61.8015	45.4575	9.79	0.951101	0.986978	1.02873	1.06573	1.05382	0.982032
1133	Q9D1E6	Tubulin-folding cofactor B OS=Mus musculus GN=Tbcb PE=1 SV=2 - [TBCB_MOUSE]	6	27.3684	44.7847	25.82	1.09457	0.913002	0.931442	1.07091	1.02835	0.989259
1134	Q9DBT5	AMP deaminase 2 OS=Mus musculus GN=Ampd2 PE=1 SV=1 - [AMPD2_MOUSE]	6	91.9654	44.5453	6.52	1.05531	0.92583	0.865273	0.972504	1.03877	0.967641
1135	P60229	Eukaryotic translation initiation factor 3 subunit E OS=Mus musculus GN=Eif3e PE=1 SV=1 - [EIF3E_MOUSE]	6	52.1874	43.3501	13.03	0.926297	1.08432	1.08426	0.972859	0.989204	1.04597
1136	P28028	Serine/threonine-protein kinase B-raf OS=Mus musculus GN=Braf PE=1 SV=3 - [BRAF_MOUSE]	6	88.7237	42.9589	8.21	1.0644	0.978771	0.946471	0.99636	1.03378	1.02213
1137	P45878	Peptidyl-prolyl cis-trans isomerase FKBP2 OS=Mus musculus GN=Fkbp2 PE=1 SV=1 - [FKBP2_MOUSE]	6	15.3342	42.72	30	1.02439	0.966387	0.97409	0.972236	1.04867	1.03142
1138	Q9Z110	Delta-1-pyrroline-5-carboxylate synthase OS=Mus musculus GN=Aldh18a1 PE=1 SV=2 - [P5CS_MOUSE]	6	87.2119	42.6419	8.93	0.95189	1.02613	0.910801	0.978545	0.989032	0.857234
1139	P70206	Plexin-A1 OS=Mus musculus GN=Plxna1 PE=1 SV=1 - [PLXA1_MOUSE]	6	210.965	41.0218	3.96	0.931501	1.00277	1.08662	1.00224	1.04309	0.942382
1140	O35143	ATPase inhibitor, mitochondrial OS=Mus musculus GN=Atpif1 PE=1 SV=2 - [ATIF1_MOUSE]	6	12.1513	40.1327	27.36	1.02513	1.01072	1.07296	1.06568	0.941508	1.0029
1141	P11404	Fatty acid-binding protein, heart OS=Mus musculus GN=Fabp3 PE=1 SV=5 - [FABPH_MOUSE]	6	14.8097	38.857	45.86	1.03158	0.985943	1.02746	1.04234	0.98862	1.09313
1142	Q6PGF7	Exocyst complex component 8 OS=Mus musculus GN=Exoc8 PE=1 SV=1 - [EXOC8_MOUSE]	6	80.9842	37.485	9.64	1.10476	0.801676	0.921322	1.02331	0.999759	0.907231
1143	P70232	Neural cell adhesion molecule L1-like protein OS=Mus musculus GN=Chl1 PE=1 SV=2 - [NCHL1_MOUSE]	6	134.99	37.4457	4.96	1.03634	0.873083	0.836453	0.986641	1.00449	0.962725
1144	Q8CI71	Syndetin OS=Mus musculus GN=Vps50 PE=1 SV=2 - [VPS50_MOUSE]	6	111.104	36.8208	6.74	0.947282	0.926988	0.88207	1.06123	0.930434	1.03537
1145	Q99LD4	COP9 signalosome complex subunit 1 OS=Mus musculus GN=Gps1 PE=1 SV=1 - [CSN1_MOUSE]	6	53.4081	35.6028	10.83	1.04044	0.999464	0.907965	1.08219	1.0082	0.926502
1146	P30999	Catenin delta-1 OS=Mus musculus GN=Ctnnd1 PE=1 SV=2 - [CTND1_MOUSE]	6	104.86	34.7904	6.93	1.07225	0.967596	1.00547	1.03678	1.04666	0.997064
1147	Q811P8	Rho GTPase-activating protein 32 OS=Mus musculus GN=Arhgap32 PE=1 SV=2 - [RHG32_MOUSE]	6	229.576	34.1618	4.5	0.862689	1.04923	1.36765	0.994747	0.877649	0.828388
1148	Q9JIF7	Coatomer subunit beta OS=Mus musculus GN=Copb1 PE=1 SV=1 - [COPB_MOUSE]	6	106.998	33.3589	7.76	0.949383	1.00133	0.918508	1.10945	0.932544	0.94246
1149	Q80U28	MAP kinase-activating death domain protein OS=Mus musculus GN=Madd PE=1 SV=2 - [MADD_MOUSE]	6	175.07	32.9918	3.55	1.03093	0.942084	0.957975	1.04061	0.974795	0.863969
1150	Q60790	Ras GTPase-activating protein 3 OS=Mus musculus GN=Rasa3 PE=1 SV=2 - [RASA3_MOUSE]	6	95.9264	32.4594	8.87	0.983532	0.959565	1.02493	0.877672	1.05142	1.02894
1151	Q8CCN5	Breast carcinoma-amplified sequence 3 homolog OS=Mus musculus GN=Bcas3 PE=1 SV=2 - [BCAS3_MOUSE]	6	100.957	31.2908	8.41	0.992862	1.05959	1.00027	1.07175	0.895197	0.963521
1152	Q6IRU2	Tropomyosin alpha-4 chain OS=Mus musculus GN=Tpm4 PE=1 SV=3 - [TPM4_MOUSE]	6	28.4504	29.7276	31.85	0.950443	1.02988	1.00643	1.02872	0.987067	1.01102
1153	Q91WG7	Diacylglycerol kinase gamma OS=Mus musculus GN=Dgkg PE=1 SV=1 - [DGKG_MOUSE]	6	88.4656	27.63	9.39	1.06404	0.943249	0.885751	1.01542	1.01806	0.948069
1154	Q9D7A8	Armadillo repeat-containing protein 1 OS=Mus musculus GN=Armc1 PE=1 SV=1 - [ARMC1_MOUSE]	6	31.2268	23.14	18.09	1.05431	0.925996	0.945278	1.02677	1.09617	0.982989
1155	P68033	Actin, alpha cardiac muscle 1 OS=Mus musculus GN=Actc1 PE=1 SV=1 - [ACTC_MOUSE]	5	41.9919	3834.18	48.81	0.86598	1.6152	1.17647	0.963647	0.816639	1.0697
1156	P02088	Hemoglobin subunit beta-1 OS=Mus musculus GN=Hbb-b1 PE=1 SV=2 - [HBB1_MOUSE]	5	15.8301	2249.39	88.44	1.17546	1.00113	1.27865	1.07241	0.963844	1.21348
1157	P63044	Vesicle-associated membrane protein 2 OS=Mus musculus GN=Vamp2 PE=1 SV=2 - [VAMP2_MOUSE]	5	12.6827	1177.56	60.34	0.947589	1.12022	1.08879	1.05965	0.927344	0.953469
1158	P02089	Hemoglobin subunit beta-2 OS=Mus musculus GN=Hbb-b2 PE=1 SV=2 - [HBB2_MOUSE]	5	15.8683	985.372	84.35	1.80676	0.582955	0.321136	1.23451	0.748327	0.413323
1159	Q923T9	Calcium/calmodulin-dependent protein kinase type II subunit gamma OS=Mus musculus GN=Camk2g PE=1 SV=1 - [KCC2G_MOUSE]	5	59.5693	740.587	28.54	1.03838	1.13375	1.25153	0.928641	0.873959	0.997587
1160	Q9D1G1	Ras-related protein Rab-1B OS=Mus musculus GN=Rab1b PE=1 SV=1 - [RAB1B_MOUSE]	5	22.1732	679.982	70.15	0.951637	1.1249	1.06107	0.981131	0.929902	0.940315
1161	P53994	Ras-related protein Rab-2A OS=Mus musculus GN=Rab2a PE=1 SV=1 - [RAB2A_MOUSE]	5	23.5328	642.156	52.83	0.932829	1.08893	1.15494	1.15976	0.863812	0.966985
1162	P62823	Ras-related protein Rab-3C OS=Mus musculus GN=Rab3c PE=1 SV=1 - [RAB3C_MOUSE]	5	25.8556	587.156	51.1	0.961823	1.06753	0.997618	1.01917	0.858432	0.879139
1163	P56564	Excitatory amino acid transporter 1 OS=Mus musculus GN=Slc1a3 PE=1 SV=2 - [EAA1_MOUSE]	5	59.5837	568.502	11.97	1.01119	1.02056	0.967281	1.05632	0.899115	0.911843
1164	Q7TQI3	Ubiquitin thioesterase OTUB1 OS=Mus musculus GN=Otub1 PE=1 SV=2 - [OTUB1_MOUSE]	5	31.2504	517.86	23.62	1.08602	0.999259	0.888847	1.02422	1.05988	0.997982
1165	P00405	Cytochrome c oxidase subunit 2 OS=Mus musculus GN=Mtco2 PE=1 SV=1 - [COX2_MOUSE]	5	25.959	457.634	23.79	0.911217	0.996903	1.15668	1.05704	0.915397	0.957197
1166	P84075	Neuron-specific calcium-binding protein hippocalcin OS=Mus musculus GN=Hpca PE=1 SV=2 - [HPCA_MOUSE]	5	22.413	455.714	67.88	0.929358	1.01018	0.961478	1.04222	1.12551	1.00004
1167	P01831	Thy-1 membrane glycoprotein OS=Mus musculus GN=Thy1 PE=1 SV=1 - [THY1_MOUSE]	5	18.0685	433.166	32.1	0.920294	0.995807	1.08207	1.0868	0.969992	0.956078
1168	Q6PHN9	Ras-related protein Rab-35 OS=Mus musculus GN=Rab35 PE=1 SV=1 - [RAB35_MOUSE]	5	23.0108	419.503	45.77	0.998223	1.08657	1.0328	0.993956	0.915253	0.931707
1169	P63213	Guanine nucleotide-binding protein G(I)/G(S)/G(O) subunit gamma-2 OS=Mus musculus GN=Gng2 PE=1 SV=2 - [GBG2_MOUSE]	5	7.84503	382.892	78.87	0.903908	1.24226	1.16243	1.01412	0.93874	0.95322
1170	P20108	Thioredoxin-dependent peroxide reductase, mitochondrial OS=Mus musculus GN=Prdx3 PE=1 SV=1 - [PRDX3_MOUSE]	5	28.1094	363.001	20.23	1.05511	0.97882	1.09819	1.06449	0.956857	1.02029
1171	P35762	CD81 antigen OS=Mus musculus GN=Cd81 PE=1 SV=2 - [CD81_MOUSE]	5	25.7972	342.388	33.9	0.926431	1.10427	1.07935	0.979743	1.08367	1.09466
1172	P35278	Ras-related protein Rab-5C OS=Mus musculus GN=Rab5c PE=1 SV=2 - [RAB5C_MOUSE]	5	23.3978	339.262	47.69	0.933028	0.956335	1.01354	0.994428	0.991232	0.999449
1173	Q9CR61	NADH dehydrogenase [ubiquinone] 1 beta subcomplex subunit 7 OS=Mus musculus GN=Ndufb7 PE=1 SV=3 - [NDUB7_MOUSE]	5	16.3202	326.94	48.91	0.990302	0.908535	1.07018	0.933191	1.11104	1.04092
1174	Q8R191	Synaptogyrin-3 OS=Mus musculus GN=Syngr3 PE=1 SV=1 - [SNG3_MOUSE]	5	24.5454	324.709	22.71	0.884017	1.00726	1.09566	1.06307	0.909547	0.909915
1175	P61294	Ras-related protein Rab-6B OS=Mus musculus GN=Rab6b PE=1 SV=1 - [RAB6B_MOUSE]	5	23.4469	311.788	53.85	0.973776	0.975172	0.940376	0.914796	1.10792	1.07777
1176	P99028	Cytochrome b-c1 complex subunit 6, mitochondrial OS=Mus musculus GN=Uqcrh PE=1 SV=2 - [QCR6_MOUSE]	5	10.428	287.89	47.19	1.02189	1.01689	1.17623	0.978815	0.935642	0.998723
1177	P10639	Thioredoxin OS=Mus musculus GN=Txn PE=1 SV=3 - [THIO_MOUSE]	5	11.6676	284.544	49.52	1.1261	1.03875	0.989316	1.07463	1.00198	1.01297
1178	Q8BGZ1	Hippocalcin-like protein 4 OS=Mus musculus GN=Hpcal4 PE=1 SV=3 - [HPCL4_MOUSE]	5	22.201	276.977	51.31	0.98493	1.10141	0.936049	1.09359	0.906285	0.945262
1179	Q9CXZ1	NADH dehydrogenase [ubiquinone] iron-sulfur protein 4, mitochondrial OS=Mus musculus GN=Ndufs4 PE=1 SV=3 - [NDUS4_MOUSE]	5	19.7722	269.916	31.43	0.964777	1.06789	1.12778	1.06116	1.01081	0.95959
1180	P63321	Ras-related protein Ral-A OS=Mus musculus GN=Rala PE=1 SV=1 - [RALA_MOUSE]	5	23.538	253.707	36.89	0.944441	1.18237	1.14292	0.999006	0.950747	1.02135
1181	Q91WS0	CDGSH iron-sulfur domain-containing protein 1 OS=Mus musculus GN=Cisd1 PE=1 SV=1 - [CISD1_MOUSE]	5	12.0892	243.953	44.44	0.986722	1.0875	1.10861	1.00784	0.96833	1.01771
1182	P21278	Guanine nucleotide-binding protein subunit alpha-11 OS=Mus musculus GN=Gna11 PE=1 SV=1 - [GNA11_MOUSE]	5	41.9975	241.805	27.86	0.876821	1.03816	0.964852	0.952809	0.933624	0.971878
1183	Q91ZR1	Ras-related protein Rab-4B OS=Mus musculus GN=Rab4b PE=1 SV=2 - [RAB4B_MOUSE]	5	23.614	238.54	38.03	0.970169	1.02202	1.00166	1.08492	0.950475	0.976825
1184	Q7M6Y3	Phosphatidylinositol-binding clathrin assembly protein OS=Mus musculus GN=Picalm PE=1 SV=1 - [PICAL_MOUSE]	5	71.4983	232.568	12.42	1.01113	0.970632	0.979288	1.01207	0.934723	0.999774
1185	P09528	Ferritin heavy chain OS=Mus musculus GN=Fth1 PE=1 SV=2 - [FRIH_MOUSE]	5	21.0533	231.656	30.77	0.95144	0.897473	1	0.901709	1.02794	1.15633
1186	Q9D0S9	Histidine triad nucleotide-binding protein 2, mitochondrial OS=Mus musculus GN=Hint2 PE=1 SV=1 - [HINT2_MOUSE]	5	17.3094	230.811	44.79	0.968404	1.01834	0.993346	0.95998	1.09741	1.06218
1187	P46097	Synaptotagmin-2 OS=Mus musculus GN=Syt2 PE=1 SV=1 - [SYT2_MOUSE]	5	47.2322	228.095	24.64	0.906002	1.24218	1.23872	0.859529	0.832219	1.15026
1188	Q9QZQ8	Core histone macro-H2A.1 OS=Mus musculus GN=H2afy PE=1 SV=3 - [H2AY_MOUSE]	5	39.7105	223.178	17.74	0.99937	0.99579	0.994955	0.938763	0.972105	1.04236
1189	P97461	40S ribosomal protein S5 OS=Mus musculus GN=Rps5 PE=1 SV=3 - [RS5_MOUSE]	5	22.875	208.884	26.96	1.00471	0.934103	1.06712	1.00933	0.964386	0.984768
1190	Q60692	Proteasome subunit beta type-6 OS=Mus musculus GN=Psmb6 PE=1 SV=3 - [PSB6_MOUSE]	5	25.3625	205.228	21.85	1.04737	0.897074	0.919137	1.01094	1.0314	0.999731
1191	Q8VBV7	COP9 signalosome complex subunit 8 OS=Mus musculus GN=Cops8 PE=1 SV=1 - [CSN8_MOUSE]	5	23.241	200.27	34.93	1.07964	0.960624	0.913168	0.955733	1.09985	1.00959
1192	Q9R0P3	S-formylglutathione hydrolase OS=Mus musculus GN=Esd PE=1 SV=1 - [ESTD_MOUSE]	5	31.2993	198.227	26.24	0.996416	0.958284	0.872791	1.03221	1.02412	1.01899
1193	P35283	Ras-related protein Rab-12 OS=Mus musculus GN=Rab12 PE=1 SV=3 - [RAB12_MOUSE]	5	27.3111	197.08	28.4	0.980221	1.0976	1.01991	0.927743	1.1373	0.909387
1194	Q8VHW2	Voltage-dependent calcium channel gamma-8 subunit OS=Mus musculus GN=Cacng8 PE=1 SV=1 - [CCG8_MOUSE]	5	43.4261	184.154	12.77	0.915622	0.997988	1.22085	1.09623	0.963429	0.913078
1195	P62267	40S ribosomal protein S23 OS=Mus musculus GN=Rps23 PE=1 SV=3 - [RS23_MOUSE]	5	15.7977	182.79	30.07	0.964671	0.987671	1.09252	0.960909	1.00316	1.08789
1196	Q9QXY6	EH domain-containing protein 3 OS=Mus musculus GN=Ehd3 PE=1 SV=2 - [EHD3_MOUSE]	5	60.7827	182.784	18.69	1.03006	0.877913	0.97354	0.873913	1.24131	1.00119
1197	Q9D892	Inosine triphosphate pyrophosphatase OS=Mus musculus GN=Itpa PE=1 SV=2 - [ITPA_MOUSE]	5	21.883	180.629	21.21	1.11199	0.891808	0.888804	0.966766	1.0732	1.05043
1198	Q9CQR4	Acyl-coenzyme A thioesterase 13 OS=Mus musculus GN=Acot13 PE=1 SV=1 - [ACO13_MOUSE]	5	15.1729	180.534	31.43	1.07169	0.952878	0.937672	0.954117	0.978655	1.00615
1199	Q8JZW4	Copine-5 OS=Mus musculus GN=Cpne5 PE=1 SV=1 - [CPNE5_MOUSE]	5	65.5506	178.945	18.04	0.860314	0.970357	0.862387	1.01029	0.926766	0.924398
1200	Q9CQ69	Cytochrome b-c1 complex subunit 8 OS=Mus musculus GN=Uqcrq PE=1 SV=3 - [QCR8_MOUSE]	5	9.76211	175.26	57.32	0.934901	1.0184	1.13629	1.02469	0.950388	1.01153
1201	Q9CQ62	2,4-dienoyl-CoA reductase, mitochondrial OS=Mus musculus GN=Decr1 PE=1 SV=1 - [DECR_MOUSE]	5	36.1907	173.473	18.51	1.00257	0.960812	1.05407	0.877428	0.850985	1.03046
1202	Q9CQ92	Mitochondrial fission 1 protein OS=Mus musculus GN=Fis1 PE=1 SV=1 - [FIS1_MOUSE]	5	16.998	171.76	42.11	1.03334	0.978317	0.945852	0.910101	1.01789	1.03444
1203	O08756	3-hydroxyacyl-CoA dehydrogenase type-2 OS=Mus musculus GN=Hsd17b10 PE=1 SV=4 - [HCD2_MOUSE]	5	27.4016	169.504	27.97	1.01644	0.998566	0.929293	1.09546	0.910254	0.932008
1204	P70349	Histidine triad nucleotide-binding protein 1 OS=Mus musculus GN=Hint1 PE=1 SV=3 - [HINT1_MOUSE]	5	13.7681	162.728	39.68	1.06735	1.02483	0.870133	1.02627	1.08033	1.0512
1205	P62889	60S ribosomal protein L30 OS=Mus musculus GN=Rpl30 PE=1 SV=2 - [RL30_MOUSE]	5	12.7757	150.33	44.35	1.05453	0.82317	0.976369	0.855039	1.16917	1.07346
1206	Q61425	Hydroxyacyl-coenzyme A dehydrogenase, mitochondrial OS=Mus musculus GN=Hadh PE=1 SV=2 - [HCDH_MOUSE]	5	34.4419	150.079	16.24	1.17019	0.967916	0.885127	0.908549	1.03329	1.13198
1207	Q9CXW4	60S ribosomal protein L11 OS=Mus musculus GN=Rpl11 PE=1 SV=4 - [RL11_MOUSE]	5	20.2396	149.531	28.09	1.06223	1.039	1.05403	0.984089	0.911515	1.02001
1208	O35633	Vesicular inhibitory amino acid transporter OS=Mus musculus GN=Slc32a1 PE=1 SV=3 - [VIAAT_MOUSE]	5	57.3435	149.388	11.24	0.882432	0.942533	0.907591	0.933196	0.970042	1.01654
1209	P35803	Neuronal membrane glycoprotein M6-b OS=Mus musculus GN=Gpm6b PE=1 SV=2 - [GPM6B_MOUSE]	5	36.1857	147.545	17.07	0.85948	1.1411	1.21058	0.961469	0.982724	0.956373
1210	P58404	Striatin-4 OS=Mus musculus GN=Strn4 PE=1 SV=2 - [STRN4_MOUSE]	5	81.5945	146.424	10.39	0.974378	0.948503	0.97325	1.00663	1.052	0.99665
1211	Q8BFZ9	Erlin-2 OS=Mus musculus GN=Erlin2 PE=1 SV=1 - [ERLN2_MOUSE]	5	37.8485	143.123	27.06	1.01439	0.996155	0.987298	1.08392	0.917626	1.02581
1212	Q61481	Calcium/calmodulin-dependent 3',5'-cyclic nucleotide phosphodiesterase 1A OS=Mus musculus GN=Pde1a PE=1 SV=2 - [PDE1A_MOUSE]	5	64.4875	141.111	13.45	1.01364	1.10396	1.04445	1.06141	0.994188	1.08716
1213	P55088	Aquaporin-4 OS=Mus musculus GN=Aqp4 PE=1 SV=2 - [AQP4_MOUSE]	5	34.4137	140.863	11.46	1.03442	1.02849	0.998357	1.03172	0.946449	1.02837
1214	P47740	Fatty aldehyde dehydrogenase OS=Mus musculus GN=Aldh3a2 PE=1 SV=2 - [AL3A2_MOUSE]	5	53.9363	136.537	15.7	0.86037	1.13978	1.09079	1.0287	0.995204	0.979125
1215	E9PUL5	Proline-rich transmembrane protein 2 OS=Mus musculus GN=Prrt2 PE=1 SV=1 - [PRRT2_MOUSE]	5	35.9019	136.037	15.32	0.956326	1.1426	1.24123	1.02613	0.890359	0.991167
1216	Q9WV98	Mitochondrial import inner membrane translocase subunit Tim9 OS=Mus musculus GN=Timm9 PE=1 SV=1 - [TIM9_MOUSE]	5	10.3372	130.3	59.55	1.01917	0.958554	1.00563	1.01019	1.05368	1.00308
1217	P63323	40S ribosomal protein S12 OS=Mus musculus GN=Rps12 PE=1 SV=2 - [RS12_MOUSE]	5	14.5156	127.747	45.45	1.06424	0.955259	1.02097	1.04873	0.999008	1.02567
1218	Q9CY58	Plasminogen activator inhibitor 1 RNA-binding protein OS=Mus musculus GN=Serbp1 PE=1 SV=2 - [PAIRB_MOUSE]	5	44.6873	126.133	15.97	0.960848	1.0825	1.07973	1.01406	0.972926	1.02516
1219	P55302	Alpha-2-macroglobulin receptor-associated protein OS=Mus musculus GN=Lrpap1 PE=1 SV=1 - [AMRP_MOUSE]	5	42.1892	125.138	13.33	0.941211	0.948361	1.0114	1.09399	1.05998	0.992737
1220	Q91VN4	MICOS complex subunit Mic25 OS=Mus musculus GN=Chchd6 PE=1 SV=2 - [MIC25_MOUSE]	5	29.8334	124.515	21.98	0.981856	0.91639	1.0266	1.00069	1.09021	0.985452
1221	Q62417	Sorbin and SH3 domain-containing protein 1 OS=Mus musculus GN=Sorbs1 PE=1 SV=2 - [SRBS1_MOUSE]	5	142.982	123.105	5.04	0.914442	1.06876	1.02089	0.998532	0.849701	0.963743
1222	P62245	40S ribosomal protein S15a OS=Mus musculus GN=Rps15a PE=1 SV=2 - [RS15A_MOUSE]	5	14.83	121.658	40.77	1.00133	0.987738	1.02343	1.03931	0.973025	0.987447
1223	O08919	Numb-like protein OS=Mus musculus GN=Numbl PE=1 SV=3 - [NUMBL_MOUSE]	5	64.0902	121.097	16.56	0.968553	0.965279	0.909914	1.00132	1.11031	1.01396
1224	P63276	40S ribosomal protein S17 OS=Mus musculus GN=Rps17 PE=1 SV=2 - [RS17_MOUSE]	5	15.5144	120.129	38.52	1.14515	1.19009	1.09799	0.99022	0.920676	0.983485
1225	Q9EQU5	Protein SET OS=Mus musculus GN=Set PE=1 SV=1 - [SET_MOUSE]	5	33.3577	116.827	17.99	1.08963	0.963931	0.933424	0.910317	0.971853	1.10586
1226	Q99M71	Mammalian ependymin-related protein 1 OS=Mus musculus GN=Epdr1 PE=1 SV=1 - [EPDR1_MOUSE]	5	25.4687	110.233	24.55	1.07201	0.962624	1.07265	0.993199	1.0612	1.03676
1227	Q91W89	Alpha-mannosidase 2C1 OS=Mus musculus GN=Man2c1 PE=1 SV=1 - [MA2C1_MOUSE]	5	115.614	109.968	6.45	0.958811	0.942779	0.748589	1.03162	0.959329	0.855228
1228	Q8VEH5	EPM2A-interacting protein 1 OS=Mus musculus GN=Epm2aip1 PE=1 SV=1 - [EPMIP_MOUSE]	5	70.0519	109.847	12.05	0.990142	1.06512	0.982982	0.968666	1.07653	1.16343
1229	Q9QZ06	Toll-interacting protein OS=Mus musculus GN=Tollip PE=1 SV=1 - [TOLIP_MOUSE]	5	30.325	108.837	21.53	1.00996	1.08156	1.10187	0.962245	1.00434	1.02433
1230	Q3UGR5	Haloacid dehalogenase-like hydrolase domain-containing protein 2 OS=Mus musculus GN=Hdhd2 PE=1 SV=2 - [HDHD2_MOUSE]	5	28.7121	108.702	23.17	0.999086	0.869923	0.820833	0.963447	1.18629	1.18842
1231	Q9Z2W1	Serine/threonine-protein kinase 25 OS=Mus musculus GN=Stk25 PE=1 SV=2 - [STK25_MOUSE]	5	48.1278	105.922	14.79	0.942448	0.966054	0.873736	0.960651	0.944588	0.887569
1232	Q9EQP2	EH domain-containing protein 4 OS=Mus musculus GN=Ehd4 PE=1 SV=1 - [EHD4_MOUSE]	5	61.4415	105.08	13.31	1.23401	0.85042	0.855544	0.935531	0.994495	0.955664
1233	P34022	Ran-specific GTPase-activating protein OS=Mus musculus GN=Ranbp1 PE=1 SV=2 - [RANG_MOUSE]	5	23.5817	104.562	22.17	1.06394	1.04659	0.985244	0.989041	1.08382	1.04091
1234	Q6URW6	Myosin-14 OS=Mus musculus GN=Myh14 PE=1 SV=1 - [MYH14_MOUSE]	5	228.446	104.365	6.3	1.06424	0.989909	0.918192	0.902609	1.00876	1.08877
1235	Q9D4H1	Exocyst complex component 2 OS=Mus musculus GN=Exoc2 PE=1 SV=1 - [EXOC2_MOUSE]	5	103.894	103.746	6.49	0.944861	1.10541	1.05191	1.09636	0.994108	0.939297
1236	Q8BTX9	Inactive hydroxysteroid dehydrogenase-like protein 1 OS=Mus musculus GN=Hsdl1 PE=1 SV=1 - [HSDL1_MOUSE]	5	36.8439	102.158	14.24	1.04048	0.886278	1.00965	0.937028	1.10247	0.886206
1237	Q99L13	3-hydroxyisobutyrate dehydrogenase, mitochondrial OS=Mus musculus GN=Hibadh PE=1 SV=1 - [3HIDH_MOUSE]	5	35.4166	101.666	22.69	0.971156	0.901258	0.900493	1.12022	1.055	0.947358
1238	P12849	cAMP-dependent protein kinase type I-beta regulatory subunit OS=Mus musculus GN=Prkar1b PE=1 SV=2 - [KAP1_MOUSE]	5	43.1971	100.624	24.15	1.02339	1.03007	1.01343	0.896485	0.994499	0.982976
1239	Q9D8B3	Charged multivesicular body protein 4b OS=Mus musculus GN=Chmp4b PE=1 SV=2 - [CHM4B_MOUSE]	5	24.9206	100.199	25	1.02462	0.973395	0.929704	1.02037	0.978212	1.01779
1240	P70663	SPARC-like protein 1 OS=Mus musculus GN=Sparcl1 PE=1 SV=3 - [SPRL1_MOUSE]	5	72.2428	98.2084	10	1.03357	0.967177	0.954768	0.957896	0.990122	0.903232
1241	Q9R0Q7	Prostaglandin E synthase 3 OS=Mus musculus GN=Ptges3 PE=1 SV=1 - [TEBP_MOUSE]	5	18.7094	97.8887	34.38	1.1742	0.939354	0.912409	1.02439	1.06579	1.0211
1242	Q5M8N4	Epimerase family protein SDR39U1 OS=Mus musculus GN=Sdr39u1 PE=1 SV=1 - [D39U1_MOUSE]	5	32.9743	97.5586	21.43	1.01523	1.05054	1.04839	1.00307	1.03101	0.977104
1243	Q9DB15	39S ribosomal protein L12, mitochondrial OS=Mus musculus GN=Mrpl12 PE=1 SV=2 - [RM12_MOUSE]	5	21.6948	97.2597	24.88	1.02293	0.934586	0.993727	0.982254	0.975978	0.966995
1244	Q8CHU3	Epsin-2 OS=Mus musculus GN=Epn2 PE=1 SV=1 - [EPN2_MOUSE]	5	63.4327	97.2462	11.26	0.952702	0.871718	0.890539	1.02159	0.947676	0.912431
1245	P24472	Glutathione S-transferase A4 OS=Mus musculus GN=Gsta4 PE=1 SV=3 - [GSTA4_MOUSE]	5	25.5474	96.2019	22.07	1.01342	1.06687	0.965304	1.14206	0.996412	0.882707
1246	Q8C5H8	NAD kinase 2, mitochondrial OS=Mus musculus GN=Nadk2 PE=1 SV=2 - [NAKD2_MOUSE]	5	50.8269	94.0981	14.38	1.04268	0.96024	0.935152	1.07802	1.12057	0.889471
1247	P47802	Metaxin-1 OS=Mus musculus GN=Mtx1 PE=1 SV=1 - [MTX1_MOUSE]	5	35.6013	93.6201	17.35	1.01351	0.94227	0.962475	0.975722	1.00676	1.04873
1248	Q9CYZ2	Tumor protein D54 OS=Mus musculus GN=Tpd52l2 PE=1 SV=1 - [TPD54_MOUSE]	5	24.0281	91.8409	22.73	1.21087	0.914063	0.906101	1.03937	1.00243	0.950231
1249	Q9CRB6	Tubulin polymerization-promoting protein family member 3 OS=Mus musculus GN=Tppp3 PE=1 SV=1 - [TPPP3_MOUSE]	5	18.9537	91.2254	31.82	1.10868	0.907789	0.839257	1.02588	1.28296	1.14332
1250	Q9D8W5	26S proteasome non-ATPase regulatory subunit 12 OS=Mus musculus GN=Psmd12 PE=1 SV=4 - [PSD12_MOUSE]	5	52.8615	87.9995	14.25	0.951582	1.13484	1.16814	1.01559	0.991325	0.966174
1251	P28271	Cytoplasmic aconitate hydratase OS=Mus musculus GN=Aco1 PE=1 SV=3 - [ACOC_MOUSE]	5	98.0635	87.6157	6.75	0.954331	0.994218	0.990176	1.07402	0.968634	1.05009
1252	Q9CTY5	Calcium uptake protein 3, mitochondrial OS=Mus musculus GN=Micu3 PE=2 SV=2 - [MICU3_MOUSE]	5	59.7725	87.5243	10.71	1.01329	0.88679	0.943782	0.962278	1.0168	0.954086
1253	Q9DAW9	Calponin-3 OS=Mus musculus GN=Cnn3 PE=1 SV=1 - [CNN3_MOUSE]	5	36.4058	87.025	16.97	1.00833	0.999475	1.05955	1.03202	1.08548	1.05725
1254	Q91V09	WD repeat-containing protein 13 OS=Mus musculus GN=Wdr13 PE=1 SV=1 - [WDR13_MOUSE]	5	53.6302	85.9527	13.2	0.917481	1.01418	0.938432	1.02373	1.00841	0.979027
1255	O55029	Coatomer subunit beta' OS=Mus musculus GN=Copb2 PE=1 SV=2 - [COPB2_MOUSE]	5	102.384	85.6022	6.52	1.02914	0.971873	0.993566	1.04947	0.987869	1.02761
1256	Q9CXY6	Interleukin enhancer-binding factor 2 OS=Mus musculus GN=Ilf2 PE=1 SV=1 - [ILF2_MOUSE]	5	43.0352	85.1912	16.15	0.912323	1.09826	1.04377	1.0161	1.05334	1.04178
1257	P97390	Vacuolar protein sorting-associated protein 45 OS=Mus musculus GN=Vps45 PE=1 SV=1 - [VPS45_MOUSE]	5	65.0119	84.0774	11.23	1.00004	1.14675	1.11324	1.11383	0.91693	1.03041
1258	Q9R1T2	SUMO-activating enzyme subunit 1 OS=Mus musculus GN=Sae1 PE=1 SV=1 - [SAE1_MOUSE]	5	38.5956	83.8177	14	1.11924	0.907083	0.964917	1.11353	0.924919	1.03529
1259	P63037	DnaJ homolog subfamily A member 1 OS=Mus musculus GN=Dnaja1 PE=1 SV=1 - [DNJA1_MOUSE]	5	44.8395	83.799	12.85	0.987237	1.0268	1.07044	0.982227	1.01547	0.97046
1260	P63046	Sulfotransferase 4A1 OS=Mus musculus GN=Sult4a1 PE=1 SV=1 - [ST4A1_MOUSE]	5	33.0323	82.6254	16.2	0.935201	1.1797	1.04973	1.08726	1.04883	0.957426
1261	Q8C163	Nuclease EXOG, mitochondrial OS=Mus musculus GN=Exog PE=1 SV=1 - [EXOG_MOUSE]	5	41.3581	82.5091	19.84	0.947907	0.90244	0.906817	0.916496	1.07002	1.01055
1262	Q91ZP9	N-terminal EF-hand calcium-binding protein 2 OS=Mus musculus GN=Necab2 PE=1 SV=1 - [NECA2_MOUSE]	5	43.4137	82.1392	15.94	0.989691	0.854766	0.825772	0.970162	1.20959	0.92028
1263	Q6X893	Choline transporter-like protein 1 OS=Mus musculus GN=Slc44a1 PE=1 SV=3 - [CTL1_MOUSE]	5	73.0182	81.5793	9.65	0.995199	0.897772	0.878603	0.92551	1.0575	1.00677
1264	Q5M8N0	CB1 cannabinoid receptor-interacting protein 1 OS=Mus musculus GN=Cnrip1 PE=1 SV=1 - [CNRP1_MOUSE]	5	18.6006	81.0819	30.49	1.0331	0.984674	1.01134	0.980963	1.0103	0.984557
1265	P12815	Programmed cell death protein 6 OS=Mus musculus GN=Pdcd6 PE=1 SV=2 - [PDCD6_MOUSE]	5	21.8538	80.5562	25.65	0.966072	0.872204	0.940956	0.95574	1.1307	1.0428
1266	P42125	Enoyl-CoA delta isomerase 1, mitochondrial OS=Mus musculus GN=Eci1 PE=1 SV=2 - [ECI1_MOUSE]	5	32.2298	80.3119	18.34	0.939783	1.15064	1.08944	0.862772	1.01843	1.21089
1267	Q80X50	Ubiquitin-associated protein 2-like OS=Mus musculus GN=Ubap2l PE=1 SV=1 - [UBP2L_MOUSE]	5	116.728	79.722	5.51	1.04546	0.989706	1.08672	0.992752	1.05382	1.04106
1268	Q2M3X8	Phosphatase and actin regulator 1 OS=Mus musculus GN=Phactr1 PE=1 SV=1 - [PHAR1_MOUSE]	5	66.2446	79.4442	10.69	0.935375	0.919717	0.914969	0.95471	1.05795	1.05256
1269	Q8K406	Leucine-rich repeat LGI family member 3 OS=Mus musculus GN=Lgi3 PE=1 SV=1 - [LGI3_MOUSE]	5	61.7786	77.9088	10.04	0.953604	1.0125	1.10833	0.923362	1.03782	1.18913
1270	Q9QZ23	NFU1 iron-sulfur cluster scaffold homolog, mitochondrial OS=Mus musculus GN=Nfu1 PE=1 SV=2 - [NFU1_MOUSE]	5	28.5494	77.6874	20.78	0.947979	0.966835	1.0273	1.00534	1.04356	0.976255
1271	Q68FL6	Methionine--tRNA ligase, cytoplasmic OS=Mus musculus GN=Mars PE=1 SV=1 - [SYMC_MOUSE]	5	101.366	77.5258	7.1	0.960285	1.06045	0.971638	1.02864	1.08841	0.928788
1272	P97352	Protein S100-A13 OS=Mus musculus GN=S100a13 PE=1 SV=1 - [S10AD_MOUSE]	5	11.1509	77.3004	47.96	1.05573	1.02856	0.9186	1.02884	1.02418	1.02418
1273	Q9DCT8	Cysteine-rich protein 2 OS=Mus musculus GN=Crip2 PE=1 SV=1 - [CRIP2_MOUSE]	5	22.7121	76.6297	30.77	1.04836	0.89618	0.957609	0.990274	0.891472	0.990289
1274	A2ALS5	Rap1 GTPase-activating protein 1 OS=Mus musculus GN=Rap1gap PE=1 SV=2 - [RPGP1_MOUSE]	5	73.3874	74.4913	8.9	1.09349	0.960347	0.915864	1.0242	1.05833	1.03953
1275	Q8BL86	Metallo-beta-lactamase domain-containing protein 2 OS=Mus musculus GN=Mblac2 PE=1 SV=2 - [MBLC2_MOUSE]	5	31.1858	74.4267	25.45	1.0459	0.98834	0.812227	1.00117	1.05749	1.05129
1276	Q5SSM3	Rho GTPase-activating protein 44 OS=Mus musculus GN=Arhgap44 PE=1 SV=1 - [RHG44_MOUSE]	5	88.9373	74.0815	5.65	0.876061	1.08673	1.03026	1.07538	0.910492	1.05174
1277	Q80VP0	Tectonin beta-propeller repeat-containing protein 1 OS=Mus musculus GN=Tecpr1 PE=1 SV=1 - [TCPR1_MOUSE]	5	130.184	73.1412	5.75	1.0277	0.957077	0.967793	1.0859	0.944739	0.907757
1278	Q99MR8	Methylcrotonoyl-CoA carboxylase subunit alpha, mitochondrial OS=Mus musculus GN=Mccc1 PE=1 SV=2 - [MCCA_MOUSE]	5	79.2934	72.695	10.32	0.999354	0.994237	0.986219	1.03476	1.04566	1.04912
1279	P54823	Probable ATP-dependent RNA helicase DDX6 OS=Mus musculus GN=Ddx6 PE=1 SV=1 - [DDX6_MOUSE]	5	54.1573	72.6311	9.52	1.03118	0.862579	0.925508	0.940981	0.983005	1.0596
1280	P61082	NEDD8-conjugating enzyme Ubc12 OS=Mus musculus GN=Ube2m PE=1 SV=1 - [UBC12_MOUSE]	5	20.8866	72.3982	29.51	1.10509	0.935549	1.01378	0.955207	0.951612	1.06022
1281	Q9QYF9	Protein NDRG3 OS=Mus musculus GN=Ndrg3 PE=1 SV=1 - [NDRG3_MOUSE]	5	41.5285	71.2903	18.93	0.906428	1.12956	1.09504	0.961582	0.980544	0.957817
1282	Q9JII5	DAZ-associated protein 1 OS=Mus musculus GN=Dazap1 PE=1 SV=2 - [DAZP1_MOUSE]	5	43.187	70.8439	18.23	0.989713	0.989034	1.00835	1.03064	1.01413	1.00697
1283	P59325	Eukaryotic translation initiation factor 5 OS=Mus musculus GN=Eif5 PE=1 SV=1 - [IF5_MOUSE]	5	48.9377	70.6049	12.12	0.990455	1.0107	1.06586	1.03934	0.892632	1.01447
1284	Q9R257	Heme-binding protein 1 OS=Mus musculus GN=Hebp1 PE=1 SV=2 - [HEBP1_MOUSE]	5	21.0534	69.8508	31.05	1.04372	1.10365	0.840001	0.956714	1.06445	1.02641
1285	Q91Z31	Polypyrimidine tract-binding protein 2 OS=Mus musculus GN=Ptbp2 PE=1 SV=2 - [PTBP2_MOUSE]	5	57.4528	69.5093	12.62	0.994372	1.01398	1.08527	0.965802	0.970366	1.02667
1286	Q91WJ8	Far upstream element-binding protein 1 OS=Mus musculus GN=Fubp1 PE=1 SV=1 - [FUBP1_MOUSE]	5	68.497	68.9976	12.14	0.956813	1.02037	1.07121	0.995101	1.04146	0.991352
1287	Q8K2C9	Very-long-chain (3R)-3-hydroxyacyl-CoA dehydratase 3 OS=Mus musculus GN=Hacd3 PE=1 SV=2 - [HACD3_MOUSE]	5	43.1034	68.3969	13.81	0.897864	1.13536	1.20601	1.01561	0.967978	1.00133
1288	Q8BL97	Serine/arginine-rich splicing factor 7 OS=Mus musculus GN=Srsf7 PE=1 SV=1 - [SRSF7_MOUSE]	5	30.7988	65.9476	18.35	0.983318	1.04058	1.12383	0.955733	0.984557	1.05421
1289	Q99KB8	Hydroxyacylglutathione hydrolase, mitochondrial OS=Mus musculus GN=Hagh PE=1 SV=2 - [GLO2_MOUSE]	5	34.0625	65.5778	17.48	0.977534	0.986964	0.990582	0.930518	1.01371	1.0792
1290	Q99KX1	Myeloid leukemia factor 2 OS=Mus musculus GN=Mlf2 PE=1 SV=1 - [MLF2_MOUSE]	5	28.0372	65.4693	27.13	0.891105	0.820274	0.931129	0.906079	0.975354	1.03278
1291	O35382	Exocyst complex component 4 OS=Mus musculus GN=Exoc4 PE=1 SV=2 - [EXOC4_MOUSE]	5	110.475	65.2581	6.05	0.887397	0.908688	0.970105	0.920539	1.05295	1.05545
1292	P97765	WW domain-binding protein 2 OS=Mus musculus GN=Wbp2 PE=1 SV=1 - [WBP2_MOUSE]	5	28.0135	63.7865	18.01	1.08677	1.0659	1.12274	0.978235	1.11215	0.981655
1293	O08989	Ras-related protein M-Ras OS=Mus musculus GN=Mras PE=1 SV=1 - [RASM_MOUSE]	5	23.8864	63.381	22.12	0.831801	0.997192	1.07085	1.06125	1.14432	0.94787
1294	Q9WUL7	ADP-ribosylation factor-like protein 3 OS=Mus musculus GN=Arl3 PE=1 SV=1 - [ARL3_MOUSE]	5	20.4738	63.3116	26.37	0.918264	1.00949	0.994576	0.900105	1.2024	0.90019
1295	Q3TPX4	Exocyst complex component 5 OS=Mus musculus GN=Exoc5 PE=1 SV=2 - [EXOC5_MOUSE]	5	81.6858	63.3079	8.33	1.0044	0.977952	0.816931	0.972292	1.04766	0.989002
1296	O08914	Fatty-acid amide hydrolase 1 OS=Mus musculus GN=Faah PE=1 SV=1 - [FAAH1_MOUSE]	5	63.1803	62.6323	10.36	0.945489	1.0751	1.16308	1.00826	0.991968	0.984626
1297	Q8BH58	TIP41-like protein OS=Mus musculus GN=Tiprl PE=1 SV=1 - [TIPRL_MOUSE]	5	31.2336	62.4252	19.19	1.01865	1.01979	1.03363	0.971784	1.00828	0.994649
1298	P62918	60S ribosomal protein L8 OS=Mus musculus GN=Rpl8 PE=1 SV=2 - [RL8_MOUSE]	5	28.0073	62.055	19.46	0.990717	1.01815	1.07755	0.97794	1.06653	1.08874
1299	P16014	Secretogranin-1 OS=Mus musculus GN=Chgb PE=1 SV=2 - [SCG1_MOUSE]	5	77.9223	61.7328	7.53	1.03003	0.903507	0.930273	1.0593	1.05916	1.05073
1300	Q80UP3	Diacylglycerol kinase zeta OS=Mus musculus GN=Dgkz PE=1 SV=2 - [DGKZ_MOUSE]	5	103.965	61.6692	7	0.996315	1.01848	0.914421	1.09102	1.0197	0.930653
1301	Q6PB44	Tyrosine-protein phosphatase non-receptor type 23 OS=Mus musculus GN=Ptpn23 PE=1 SV=2 - [PTN23_MOUSE]	5	185.1	61.5234	3.25	0.91274	1.00176	1.0177	0.906862	1.05153	1.06205
1302	Q9CPR4	60S ribosomal protein L17 OS=Mus musculus GN=Rpl17 PE=1 SV=3 - [RL17_MOUSE]	5	21.4094	60.9258	28.8	1.04709	1.11202	1.20122	0.893489	0.969065	1.04191
1303	Q922J3	CAP-Gly domain-containing linker protein 1 OS=Mus musculus GN=Clip1 PE=1 SV=1 - [CLIP1_MOUSE]	5	155.718	60.7798	5.97	0.939089	0.914683	1.02932	0.994807	0.987441	1.01841
1304	Q61290	Voltage-dependent R-type calcium channel subunit alpha-1E OS=Mus musculus GN=Cacna1e PE=1 SV=1 - [CAC1E_MOUSE]	5	257.071	60.2752	3.17	0.944407	1.00225	0.962407	0.857401	1.10164	1.0364
1305	Q6ZWV3	60S ribosomal protein L10 OS=Mus musculus GN=Rpl10 PE=1 SV=3 - [RL10_MOUSE]	5	24.5879	60.1627	22.43	0.931019	1.00606	1.16592	0.960109	1.00422	1.03793
1306	Q922H2	[Pyruvate dehydrogenase (acetyl-transferring)] kinase isozyme 3, mitochondrial OS=Mus musculus GN=Pdk3 PE=1 SV=1 - [PDK3_MOUSE]	5	47.8926	60.1384	15.42	0.944057	0.975713	0.940353	1.00612	0.950843	0.970566
1307	Q9CQS4	Solute carrier family 25 member 46 OS=Mus musculus GN=Slc25a46 PE=1 SV=1 - [S2546_MOUSE]	5	46.1949	60.0306	16.51	0.991121	1.00951	0.984821	0.985774	0.985583	1.0272
1308	Q8R001	Microtubule-associated protein RP/EB family member 2 OS=Mus musculus GN=Mapre2 PE=1 SV=1 - [MARE2_MOUSE]	5	36.9231	59.7191	18.4	0.920167	1.11652	1.10064	1.09734	0.995937	1.00481
1309	P53026	60S ribosomal protein L10a OS=Mus musculus GN=Rpl10a PE=1 SV=3 - [RL10A_MOUSE]	5	24.9006	58.8513	23.04	1.08055	1.01347	0.975722	0.932773	0.999178	1.01876
1310	Q9D4H8	Cullin-2 OS=Mus musculus GN=Cul2 PE=1 SV=2 - [CUL2_MOUSE]	5	86.8208	58.2674	6.98	0.893491	1.03189	0.998194	1.11732	1.03656	0.848925
1311	Q80Y17	Lethal(2) giant larvae protein homolog 1 OS=Mus musculus GN=Llgl1 PE=1 SV=1 - [L2GL1_MOUSE]	5	112.547	57.6379	6.76	0.930143	1.05742	0.978982	0.989614	1.29014	1.05219
1312	Q8BTM8	Filamin-A OS=Mus musculus GN=Flna PE=1 SV=5 - [FLNA_MOUSE]	5	281.046	56.6697	2.57	1.00748	0.913997	1.05055	0.972474	1.00812	1.01723
1313	Q9DAK9	14 kDa phosphohistidine phosphatase OS=Mus musculus GN=Phpt1 PE=1 SV=1 - [PHP14_MOUSE]	5	13.9877	56.5619	40.32	1.22051	0.857968	0.938542	0.980401	1.07909	1.12632
1314	Q9QYA2	Mitochondrial import receptor subunit TOM40 homolog OS=Mus musculus GN=Tomm40 PE=1 SV=3 - [TOM40_MOUSE]	5	37.8711	56.5574	15.79	1.00069	1.01065	1.06817	0.988083	1.07275	1.00326
1315	Q60780	Growth arrest-specific protein 7 OS=Mus musculus GN=Gas7 PE=1 SV=1 - [GAS7_MOUSE]	5	48.1432	55.3396	14.49	0.985884	1.06013	1.0877	0.957261	1.01378	1.01005
1316	Q9JHK4	Geranylgeranyl transferase type-2 subunit alpha OS=Mus musculus GN=Rabggta PE=1 SV=1 - [PGTA_MOUSE]	5	64.9481	54.9421	10.23	0.948338	0.982408	0.960652	1.00038	1.02459	0.947631
1317	Q62318	Transcription intermediary factor 1-beta OS=Mus musculus GN=Trim28 PE=1 SV=3 - [TIF1B_MOUSE]	5	88.7905	53.5611	6.71	1.02222	1.09895	1.06131	1.04131	1.03505	0.921677
1318	F6ZDS4	Nucleoprotein TPR OS=Mus musculus GN=Tpr PE=1 SV=1 - [TPR_MOUSE]	5	273.824	53.4895	1.97	0.935606	1.02915	0.95389	0.883827	0.960295	0.986518
1319	Q9WUM3	Coronin-1B OS=Mus musculus GN=Coro1b PE=1 SV=1 - [COR1B_MOUSE]	5	53.878	52.8566	10.12	0.937003	0.960567	1.02626	1.00333	1.01633	0.994813
1320	Q3USB7	Inactive phospholipase C-like protein 1 OS=Mus musculus GN=Plcl1 PE=1 SV=3 - [PLCL1_MOUSE]	5	122.594	52.6415	4.56	1.10368	0.950002	0.92396	1.00801	1.06102	1.15331
1321	Q60960	Importin subunit alpha-5 OS=Mus musculus GN=Kpna1 PE=1 SV=2 - [IMA5_MOUSE]	5	60.1444	52.6107	9.29	0.902007	1.08013	1.1207	1.02927	0.938394	0.944991
1322	Q9Z2Y8	Pyridoxal phosphate homeostasis protein OS=Mus musculus GN=Plpbp PE=1 SV=1 - [PLPHP_MOUSE]	5	30.0296	52.4113	22.99	1.03475	0.972129	0.947061	0.96245	1.01103	0.954839
1323	Q8R361	Rab11 family-interacting protein 5 OS=Mus musculus GN=Rab11fip5 PE=1 SV=2 - [RFIP5_MOUSE]	5	69.5104	52.1742	9.46	1.05633	1.01882	1.04409	0.97936	1.02254	1.02828
1324	P62852	40S ribosomal protein S25 OS=Mus musculus GN=Rps25 PE=1 SV=1 - [RS25_MOUSE]	5	13.7337	51.6071	29.6	1.06123	0.940133	0.988184	1.04256	1.06468	0.974456
1325	Q921F2	TAR DNA-binding protein 43 OS=Mus musculus GN=Tardbp PE=1 SV=1 - [TADBP_MOUSE]	5	44.5193	50.8692	11.59	1.05501	0.939645	1.17346	0.994364	0.991138	1.02579
1326	P07309	Transthyretin OS=Mus musculus GN=Ttr PE=1 SV=1 - [TTHY_MOUSE]	5	15.766	50.7811	34.69	0.992035	1.03916	0.940905	1.19265	1.40663	1.28396
1327	P28658	Ataxin-10 OS=Mus musculus GN=Atxn10 PE=1 SV=2 - [ATX10_MOUSE]	5	53.6725	50.6099	11.16	0.856585	1.17712	1.13021	1.27403	1.0046	0.892277
1328	Q8K354	Carbonyl reductase [NADPH] 3 OS=Mus musculus GN=Cbr3 PE=1 SV=1 - [CBR3_MOUSE]	5	30.9339	50.3647	24.55	0.959692	1.15943	1.05915	1.07455	0.937554	1.05592
1329	Q8R146	Acylamino-acid-releasing enzyme OS=Mus musculus GN=Apeh PE=1 SV=3 - [APEH_MOUSE]	5	81.5286	50.1687	7.51	0.98088	0.924396	0.918588	1.05413	0.870661	0.934666
1330	Q3UYC0	Protein phosphatase 1H OS=Mus musculus GN=Ppm1h PE=1 SV=1 - [PPM1H_MOUSE]	5	56.3447	50.0559	12.48	1.08323	0.952607	1.09787	0.857174	1.14624	1.05534
1331	Q9D1D4	Transmembrane emp24 domain-containing protein 10 OS=Mus musculus GN=Tmed10 PE=1 SV=1 - [TMEDA_MOUSE]	5	24.8949	50.0041	25.57	1.03039	1.18781	1.07118	1.08149	0.914686	1.03569
1332	Q9D6Z1	Nucleolar protein 56 OS=Mus musculus GN=Nop56 PE=1 SV=2 - [NOP56_MOUSE]	5	64.4241	49.8295	8.79	0.977257	0.88345	0.934303	0.985339	1.07519	0.930096
1333	P97355	Spermine synthase OS=Mus musculus GN=Sms PE=1 SV=1 - [SPSY_MOUSE]	5	41.2868	49.1069	13.66	1.02958	0.96243	1.01746	1.00039	1.03108	1.02166
1334	Q3THK7	GMP synthase [glutamine-hydrolyzing] OS=Mus musculus GN=Gmps PE=1 SV=2 - [GUAA_MOUSE]	5	76.6749	48.9818	8.95	1.1052	0.922375	0.945851	1.09905	1.08536	0.993303
1335	Q6P069	Sorcin OS=Mus musculus GN=Sri PE=1 SV=1 - [SORCN_MOUSE]	5	21.6133	48.684	30.3	1.01406	0.994395	1.048	0.998297	0.954717	1.03484
1336	Q80U49	Centrosomal protein of 170 kDa protein B OS=Mus musculus GN=Cep170b PE=1 SV=2 - [C170B_MOUSE]	5	170.718	48.2165	5.08	1.04819	1.09635	1.10388	1.04388	1.00241	1.02756
1337	Q9CXJ4	ATP-binding cassette sub-family B member 8, mitochondrial OS=Mus musculus GN=Abcb8 PE=1 SV=1 - [ABCB8_MOUSE]	5	77.9501	47.82	9.07	0.869609	1.06377	1.07189	1.0216	0.897027	1.00744
1338	Q9EPL2	Calsyntenin-1 OS=Mus musculus GN=Clstn1 PE=1 SV=1 - [CSTN1_MOUSE]	5	108.831	46.9874	5.31	1.26747	0.911167	0.974615	0.937844	0.966466	0.972927
1339	Q60770	Syntaxin-binding protein 3 OS=Mus musculus GN=Stxbp3 PE=1 SV=1 - [STXB3_MOUSE]	5	67.8989	46.4257	8.28	1.0201	1.02506	0.871556	0.954012	0.999067	1.04045
1340	Q61543	Golgi apparatus protein 1 OS=Mus musculus GN=Glg1 PE=1 SV=1 - [GSLG1_MOUSE]	5	133.646	46.1872	4.17	0.902916	0.921811	0.903557	0.991775	0.881594	0.915039
1341	A2AWA9	Rab GTPase-activating protein 1 OS=Mus musculus GN=Rabgap1 PE=1 SV=1 - [RBGP1_MOUSE]	5	120.722	46.0805	4.7	0.953961	0.940312	0.853496	1.10408	0.994663	0.9435
1342	Q5U458	DnaJ homolog subfamily C member 11 OS=Mus musculus GN=Dnajc11 PE=1 SV=2 - [DJC11_MOUSE]	5	63.1938	45.0085	9.84	0.890687	1.03966	1.0832	0.987068	0.997794	0.948396
1343	O55142	60S ribosomal protein L35a OS=Mus musculus GN=Rpl35a PE=1 SV=2 - [RL35A_MOUSE]	5	12.5457	44.7806	37.27	0.995585	0.967565	1.12021	0.957849	1.02239	1.03741
1344	Q8BJH1	Zinc finger C2HC domain-containing protein 1A OS=Mus musculus GN=Zc2hc1a PE=1 SV=1 - [ZC21A_MOUSE]	5	35.1301	44.427	14.81	1.02901	0.980589	1.03094	0.957123	1.02515	1.01649
1345	Q8BJ42	Disks large-associated protein 2 OS=Mus musculus GN=Dlgap2 PE=1 SV=2 - [DLGP2_MOUSE]	5	118.998	44.3543	8.69	1.02635	0.947954	1.00233	1.02324	1.1398	0.939476
1346	Q9QZF2	Glypican-1 OS=Mus musculus GN=Gpc1 PE=1 SV=1 - [GPC1_MOUSE]	5	61.3207	44.0539	12.75	0.955973	0.982417	1.13145	1.00035	1.19862	1.07413
1347	Q61578	NADPH:adrenodoxin oxidoreductase, mitochondrial OS=Mus musculus GN=Fdxr PE=1 SV=1 - [ADRO_MOUSE]	5	54.1684	43.8927	10.93	1.11486	0.892639	0.792349	0.902285	1.06731	1.08689
1348	Q9JJY3	Sphingomyelin phosphodiesterase 3 OS=Mus musculus GN=Smpd3 PE=1 SV=1 - [NSMA2_MOUSE]	5	71.152	43.3927	7.63	0.868539	0.99219	1.0576	0.999852	1.00784	1.04742
1349	Q9CX00	IST1 homolog OS=Mus musculus GN=Ist1 PE=1 SV=1 - [IST1_MOUSE]	5	39.4435	43.3381	11.6	0.895217	0.97592	1.11483	1.00912	0.980008	0.995158
1350	P62317	Small nuclear ribonucleoprotein Sm D2 OS=Mus musculus GN=Snrpd2 PE=1 SV=1 - [SMD2_MOUSE]	5	13.5182	43.0705	37.29	0.98188	1.02731	1.11573	0.921792	1.01394	1.06056
1351	Q8BU30	Isoleucine--tRNA ligase, cytoplasmic OS=Mus musculus GN=Iars PE=1 SV=2 - [SYIC_MOUSE]	5	144.179	42.77	3.57	1.02325	0.923348	0.936321	0.972935	0.991284	0.968354
1352	P70297	Signal transducing adapter molecule 1 OS=Mus musculus GN=Stam PE=1 SV=3 - [STAM1_MOUSE]	5	59.7335	42.3953	9.67	1.12124	0.997373	0.997797	0.933978	0.959978	0.970282
1353	P61358	60S ribosomal protein L27 OS=Mus musculus GN=Rpl27 PE=1 SV=2 - [RL27_MOUSE]	5	15.7877	41.7761	30.88	1.05246	0.880812	1.0067	0.912401	1.06279	1.13275
1354	O70228	Probable phospholipid-transporting ATPase IIA OS=Mus musculus GN=Atp9a PE=1 SV=3 - [ATP9A_MOUSE]	5	118.532	41.6275	4.78	1.04346	0.949025	0.917746	1.05149	0.894387	0.953552
1355	Q8BMI3	ADP-ribosylation factor-binding protein GGA3 OS=Mus musculus GN=Gga3 PE=1 SV=2 - [GGA3_MOUSE]	5	77.924	40.825	9.05	1.10033	1.10668	0.922982	0.955026	1.03243	1.04243
1356	P27048	Small nuclear ribonucleoprotein-associated protein B OS=Mus musculus GN=Snrpb PE=1 SV=1 - [RSMB_MOUSE]	5	23.6402	40.1	19.48	0.963363	0.968103	1.0687	0.930014	1.02752	1.07624
1357	P55096	ATP-binding cassette sub-family D member 3 OS=Mus musculus GN=Abcd3 PE=1 SV=2 - [ABCD3_MOUSE]	5	75.4263	39.6556	8.5	0.861039	0.981521	0.927349	0.950485	0.950121	0.901978
1358	Q9EP89	Serine beta-lactamase-like protein LACTB, mitochondrial OS=Mus musculus GN=Lactb PE=1 SV=1 - [LACTB_MOUSE]	5	60.6673	39.5279	9.98	0.936529	1.03826	0.991101	1.10071	0.923903	0.993624
1359	Q6NZJ6	Eukaryotic translation initiation factor 4 gamma 1 OS=Mus musculus GN=Eif4g1 PE=1 SV=1 - [IF4G1_MOUSE]	5	175.967	39.2959	5.5	1.02707	1.08597	0.991833	0.99295	1.12301	1.0512
1360	Q6NS60	F-box only protein 41 OS=Mus musculus GN=Fbxo41 PE=1 SV=3 - [FBX41_MOUSE]	5	94.2722	38.9636	6.3	1.0192	1.02064	1.0511	1.11467	1.09996	0.992961
1361	P35235	Tyrosine-protein phosphatase non-receptor type 11 OS=Mus musculus GN=Ptpn11 PE=1 SV=2 - [PTN11_MOUSE]	5	68.4174	38.8469	8.71	1.04653	0.916801	0.945153	1.13818	1.08684	0.92292
1362	Q9Z1Q2	Protein ABHD16A OS=Mus musculus GN=Abhd16a PE=1 SV=3 - [ABHGA_MOUSE]	5	63.046	38.8391	9.86	1.00666	0.91404	0.99604	0.879468	1.19975	1.04242
1363	Q64213	Splicing factor 1 OS=Mus musculus GN=Sf1 PE=1 SV=6 - [SF01_MOUSE]	5	70.3581	38.8146	10.11	1.12894	0.814683	0.894971	1.0091	0.97173	1.04311
1364	P62812	Gamma-aminobutyric acid receptor subunit alpha-1 OS=Mus musculus GN=Gabra1 PE=1 SV=1 - [GBRA1_MOUSE]	5	51.7207	38.6437	14.29	0.928944	1.02494	1.13529	1.02319	0.921574	0.923421
1365	Q80XI3	Eukaryotic translation initiation factor 4 gamma 3 OS=Mus musculus GN=Eif4g3 PE=1 SV=2 - [IF4G3_MOUSE]	5	174.781	37.2651	5.51	0.968003	0.942117	1.05047	0.905583	0.982448	0.960503
1366	Q91YP0	L-2-hydroxyglutarate dehydrogenase, mitochondrial OS=Mus musculus GN=L2hgdh PE=1 SV=1 - [L2HDH_MOUSE]	5	50.8663	37.26	12.72	1.09348	0.991454	0.873637	0.933629	1.05912	1.05056
1367	Q8BTZ7	Mannose-1-phosphate guanyltransferase beta OS=Mus musculus GN=Gmppb PE=1 SV=1 - [GMPPB_MOUSE]	5	39.8906	36.6082	18.33	0.993226	1.0562	1.02584	0.877537	1.11829	1.13501
1368	Q60829	Protein phosphatase 1 regulatory subunit 1B OS=Mus musculus GN=Ppp1r1b PE=1 SV=2 - [PPR1B_MOUSE]	5	21.7673	36.3133	28.87	1.04423	0.838824	0.64245	0.890211	0.939925	0.983609
1369	Q8R4N0	Citramalyl-CoA lyase, mitochondrial OS=Mus musculus GN=Clybl PE=1 SV=2 - [CLYBL_MOUSE]	5	37.5248	35.439	14.5	1.14141	0.905871	1.00064	0.976126	1.06792	1.00336
1370	Q9D517	1-acyl-sn-glycerol-3-phosphate acyltransferase gamma OS=Mus musculus GN=Agpat3 PE=1 SV=2 - [PLCC_MOUSE]	5	43.2676	34.5325	11.44	0.927197	1.00344	1.14687	1.02816	1.05577	0.920713
1371	Q9WUD1	STIP1 homology and U box-containing protein 1 OS=Mus musculus GN=Stub1 PE=1 SV=1 - [CHIP_MOUSE]	5	34.8873	32.8926	18.42	0.995768	0.992901	0.973078	1.00701	1.01419	0.992864
1372	Q8R050	Eukaryotic peptide chain release factor GTP-binding subunit ERF3A OS=Mus musculus GN=Gspt1 PE=1 SV=2 - [ERF3A_MOUSE]	5	68.5819	31.0955	7.7	0.993433	1.01692	0.962653	0.960514	1.02149	1.00612
1373	O70492	Sorting nexin-3 OS=Mus musculus GN=Snx3 PE=1 SV=3 - [SNX3_MOUSE]	5	18.7457	30.9305	32.1	1.06031	0.882583	0.97777	0.999634	1.03505	0.995505
1374	P47934	Carnitine O-acetyltransferase OS=Mus musculus GN=Crat PE=1 SV=3 - [CACP_MOUSE]	5	70.7943	30.6	7.83	0.94828	0.978183	1.08081	1.00534	0.983071	1.04402
1375	O35887	Calumenin OS=Mus musculus GN=Calu PE=1 SV=1 - [CALU_MOUSE]	5	37.0405	29.97	12.06	1.02055	0.93314	1.03313	0.984165	1.0576	0.9733
1376	B1AZP2	Disks large-associated protein 4 OS=Mus musculus GN=Dlgap4 PE=1 SV=1 - [DLGP4_MOUSE]	5	107.97	29.91	7.26	1.08869	0.90287	0.954613	0.953815	0.923228	0.961377
1377	Q99J08	SEC14-like protein 2 OS=Mus musculus GN=Sec14l2 PE=1 SV=1 - [S14L2_MOUSE]	5	46.2706	29.03	8.93	0.997516	1.02313	1.06014	0.95484	0.962948	0.989722
1378	Q80TY0	Formin-binding protein 1 OS=Mus musculus GN=Fnbp1 PE=1 SV=2 - [FNBP1_MOUSE]	5	71.2995	27.54	8.12	0.969919	0.968686	0.950523	1.0286	1.00169	1.01372
1379	P28741	Kinesin-like protein KIF3A OS=Mus musculus GN=Kif3a PE=1 SV=2 - [KIF3A_MOUSE]	5	80.12	27.47	8.56	1.00868	0.989789	0.862256	1.00126	1.10038	1.06507
1380	Q99PL5	Ribosome-binding protein 1 OS=Mus musculus GN=Rrbp1 PE=1 SV=2 - [RRBP1_MOUSE]	5	172.776	26.4979	18.57	1.12767	1.07108	1.11438	1.01243	0.866673	1.03224
1381	Q8VHL1	Histone-lysine N-methyltransferase SETD7 OS=Mus musculus GN=Setd7 PE=1 SV=2 - [SETD7_MOUSE]	5	40.4811	26.3219	16.39	1.05144	0.951973	0.977641	0.981696	0.988981	1.02136
1382	Q7TQH0	Ataxin-2-like protein OS=Mus musculus GN=Atxn2l PE=1 SV=1 - [ATX2L_MOUSE]	5	110.58	25.9781	5.15	0.960026	0.942903	0.955591	0.848944	0.979982	1.03578
1383	Q8BY89	Choline transporter-like protein 2 OS=Mus musculus GN=Slc44a2 PE=1 SV=2 - [CTL2_MOUSE]	5	80.0567	25.9043	8.07	0.9073	0.948272	0.971833	0.947248	0.99218	0.929755
1384	Q9QZE7	Translin-associated protein X OS=Mus musculus GN=Tsnax PE=1 SV=1 - [TSNAX_MOUSE]	5	32.9058	19.61	16.9	0.999729	0.883126	0.960681	1.0134	0.999317	0.926321
1385	A2ASZ8	Calcium-binding mitochondrial carrier protein SCaMC-2 OS=Mus musculus GN=Slc25a25 PE=1 SV=1 - [SCMC2_MOUSE]	5	52.5872	0	10.87	1.04341	0.995875	0.916999	0.968025	1.04717	1.06965
1386	Q8BX70	Vacuolar protein sorting-associated protein 13C OS=Mus musculus GN=Vps13c PE=1 SV=2 - [VP13C_MOUSE]	5	419.824	0	1.49	1.03515	0.783071	0.905336	1.03496	1.03359	0.934788
1387	P99024	Tubulin beta-5 chain OS=Mus musculus GN=Tubb5 PE=1 SV=1 - [TBB5_MOUSE]	4	49.639	12141.4	73.87	1.11185	0.99491	0.891558	0.97813	1.00925	0.991037
1388	Q9JJZ2	Tubulin alpha-8 chain OS=Mus musculus GN=Tuba8 PE=1 SV=1 - [TBA8_MOUSE]	4	50.0195	5852.83	46.77	0.899082	1.23975	1.20183	1.03395	1.02008	0.910327
1389	P10854	Histone H2B type 1-M OS=Mus musculus GN=Hist1h2bm PE=1 SV=2 - [H2B1M_MOUSE]	4	13.9276	1677.17	63.49	1.00618	1.02508	1.19903	0.884768	0.976257	1.12771
1390	Q91ZZ3	Beta-synuclein OS=Mus musculus GN=Sncb PE=1 SV=1 - [SYUB_MOUSE]	4	14.0429	739.727	63.16	1.10014	1.0952	1.07677	1.01159	0.971206	1.04598
1391	P15864	Histone H1.2 OS=Mus musculus GN=Hist1h1c PE=1 SV=2 - [H12_MOUSE]	4	21.2537	700.563	53.77	1.0684	0.963069	1.02458	0.9449	0.906844	1.06658
1392	Q9CZT8	Ras-related protein Rab-3B OS=Mus musculus GN=Rab3b PE=1 SV=1 - [RAB3B_MOUSE]	4	24.7412	640.392	47.03	0.985064	1.13979	1.11435	1.06054	0.810719	0.907872
1393	O35737	Heterogeneous nuclear ribonucleoprotein H OS=Mus musculus GN=Hnrnph1 PE=1 SV=3 - [HNRH1_MOUSE]	4	49.1684	435.941	36.75	0.88543	1.04708	1.12972	0.958848	1.01821	0.969732
1394	P62075	Mitochondrial import inner membrane translocase subunit Tim13 OS=Mus musculus GN=Timm13 PE=1 SV=1 - [TIM13_MOUSE]	4	10.4509	392.521	53.68	0.939889	1.06708	1.01157	0.993238	1.00773	1.03579
1395	P62141	Serine/threonine-protein phosphatase PP1-beta catalytic subunit OS=Mus musculus GN=Ppp1cb PE=1 SV=3 - [PP1B_MOUSE]	4	37.1626	387.859	48.01	0.98483	1.02391	0.975197	0.956496	1.06985	1.03466
1396	Q61990	Poly(rC)-binding protein 2 OS=Mus musculus GN=Pcbp2 PE=1 SV=1 - [PCBP2_MOUSE]	4	38.1974	346.381	28.73	1.0867	1.05126	1.04366	1.03452	0.914	1.00596
1397	P56135	ATP synthase subunit f, mitochondrial OS=Mus musculus GN=Atp5j2 PE=1 SV=3 - [ATPK_MOUSE]	4	10.3374	346.343	36.36	0.950078	0.970512	1.0662	1.01066	0.929815	0.951635
1398	Q9QZM0	Ubiquilin-2 OS=Mus musculus GN=Ubqln2 PE=1 SV=2 - [UBQL2_MOUSE]	4	67.3083	294.359	18.65	0.953847	1.01617	0.909351	1.13881	1.07915	0.983049
1399	P63001	Ras-related C3 botulinum toxin substrate 1 OS=Mus musculus GN=Rac1 PE=1 SV=1 - [RAC1_MOUSE]	4	21.4362	277.144	36.98	1.00411	1.09684	1.0375	0.94654	0.985476	0.986553
1400	Q8R317	Ubiquilin-1 OS=Mus musculus GN=Ubqln1 PE=1 SV=1 - [UBQL1_MOUSE]	4	61.9372	261.817	19.24	0.974916	0.963655	0.977627	0.94661	1.07333	1.06979
1401	P62858	40S ribosomal protein S28 OS=Mus musculus GN=Rps28 PE=1 SV=1 - [RS28_MOUSE]	4	7.8362	238.192	52.17	1.014	1.04902	0.963271	0.963894	1.04132	1.10475
1402	Q8JZS0	Protein lin-7 homolog A OS=Mus musculus GN=Lin7a PE=1 SV=2 - [LIN7A_MOUSE]	4	25.9766	234.236	39.06	0.964284	0.998499	1.01815	0.937782	1.00297	0.953349
1403	Q9D8W7	OCIA domain-containing protein 2 OS=Mus musculus GN=Ociad2 PE=1 SV=1 - [OCAD2_MOUSE]	4	16.9147	214.192	25.32	1.02405	0.900117	1.15207	1.04769	1.00402	0.916606
1404	O35609	Secretory carrier-associated membrane protein 3 OS=Mus musculus GN=Scamp3 PE=1 SV=3 - [SCAM3_MOUSE]	4	38.4333	208.035	18.62	0.942025	0.956005	0.99045	1.06212	1.0796	0.963616
1405	P31648	Sodium- and chloride-dependent GABA transporter 1 OS=Mus musculus GN=Slc6a1 PE=1 SV=2 - [SC6A1_MOUSE]	4	66.9571	207.37	8.35	0.956001	1.08519	1.1574	1.00693	0.973306	0.937456
1406	P05132	cAMP-dependent protein kinase catalytic subunit alpha OS=Mus musculus GN=Prkaca PE=1 SV=3 - [KAPCA_MOUSE]	4	40.545	205.762	27.64	0.911224	1.17207	1.134	0.909412	0.969525	1.02834
1407	Q9CQN1	Heat shock protein 75 kDa, mitochondrial OS=Mus musculus GN=Trap1 PE=1 SV=1 - [TRAP1_MOUSE]	4	80.1585	201.924	7.22	1.01774	0.997975	1.21553	0.943898	1.0357	1.06248
1408	Q9CQI3	Glia maturation factor beta OS=Mus musculus GN=Gmfb PE=1 SV=3 - [GMFB_MOUSE]	4	16.7124	200.161	30.28	1.02596	1.02376	0.900127	1.04848	1.02965	1.01689
1409	P62743	AP-2 complex subunit sigma OS=Mus musculus GN=Ap2s1 PE=1 SV=1 - [AP2S1_MOUSE]	4	17.0067	196.745	27.46	0.898893	0.968275	1.00215	1.08341	0.988017	0.895791
1410	Q8JZP2	Synapsin-3 OS=Mus musculus GN=Syn3 PE=1 SV=2 - [SYN3_MOUSE]	4	63.2748	194.445	11.57	0.934236	0.953856	0.965957	1.00369	1.01644	0.961509
1411	P84086	Complexin-2 OS=Mus musculus GN=Cplx2 PE=1 SV=1 - [CPLX2_MOUSE]	4	15.3847	189.991	70.15	0.961248	1.03783	1.09883	1.06189	0.967842	1.04353
1412	Q9R1P1	Proteasome subunit beta type-3 OS=Mus musculus GN=Psmb3 PE=1 SV=1 - [PSB3_MOUSE]	4	22.9494	182.156	26.83	1.04825	1.07757	0.985094	1.063	1.09229	1.04873
1413	Q9Z2X1	Heterogeneous nuclear ribonucleoprotein F OS=Mus musculus GN=Hnrnpf PE=1 SV=3 - [HNRPF_MOUSE]	4	45.7009	178.845	19.52	1.07973	0.912083	0.919822	0.942453	0.927121	1.15307
1414	P23927	Alpha-crystallin B chain OS=Mus musculus GN=Cryab PE=1 SV=2 - [CRYAB_MOUSE]	4	20.0564	175.191	25.14	0.981412	0.858468	0.768396	0.767019	1.27942	1.3718
1415	Q8R5M8	Cell adhesion molecule 1 OS=Mus musculus GN=Cadm1 PE=1 SV=2 - [CADM1_MOUSE]	4	49.7571	173.565	11.84	0.914378	1.09315	0.990682	1.04621	0.964884	0.977047
1416	Q62048	Astrocytic phosphoprotein PEA-15 OS=Mus musculus GN=Pea15 PE=1 SV=1 - [PEA15_MOUSE]	4	15.0448	171.986	28.46	1.20488	0.934064	0.87062	1.0874	1.0056	1.03135
1417	Q8VED9	Galectin-related protein OS=Mus musculus GN=Lgalsl PE=1 SV=1 - [LEGL_MOUSE]	4	18.9436	170.533	26.74	1.05236	0.91947	0.909304	0.969874	1.06406	1.06458
1418	O09061	Proteasome subunit beta type-1 OS=Mus musculus GN=Psmb1 PE=1 SV=1 - [PSB1_MOUSE]	4	26.3553	167.219	23.75	1.04365	0.97777	0.966189	0.999962	1.06879	1.05821
1419	Q9Z1R2	Large proline-rich protein BAG6 OS=Mus musculus GN=Bag6 PE=1 SV=1 - [BAG6_MOUSE]	4	120.962	165.969	3.73	0.92283	0.942232	1.00595	0.930357	1.0538	0.965218
1420	Q9CQR2	40S ribosomal protein S21 OS=Mus musculus GN=Rps21 PE=1 SV=1 - [RS21_MOUSE]	4	9.13555	165.368	42.17	0.991681	0.999508	0.970105	0.955972	1.02651	1.08626
1421	Q8VE33	Ganglioside-induced differentiation-associated protein 1-like 1 OS=Mus musculus GN=Gdap1l1 PE=1 SV=1 - [GD1L1_MOUSE]	4	42.2906	163.867	15.14	0.893344	1.07386	1.01953	1.02772	1.01481	1.0164
1422	O35344	Importin subunit alpha-4 OS=Mus musculus GN=Kpna3 PE=1 SV=1 - [IMA4_MOUSE]	4	57.7368	160.986	8.25	1.01707	0.92564	0.980119	0.999166	1.03024	1.01359
1423	Q62433	Protein NDRG1 OS=Mus musculus GN=Ndrg1 PE=1 SV=1 - [NDRG1_MOUSE]	4	42.9809	156.555	15.48	0.982536	1.15699	1.03303	0.880512	1.0593	1.08423
1424	P62484	Abl interactor 2 OS=Mus musculus GN=Abi2 PE=1 SV=1 - [ABI2_MOUSE]	4	49.3565	155.591	16.82	1.08588	0.897688	0.872383	1.03094	1.03412	0.983709
1425	Q60817	Nascent polypeptide-associated complex subunit alpha OS=Mus musculus GN=Naca PE=1 SV=1 - [NACA_MOUSE]	4	23.3697	154.198	26.51	1.03869	0.942448	0.926799	1.02866	1.02244	0.987977
1426	Q9CR98	Protein FAM136A OS=Mus musculus GN=Fam136a PE=1 SV=1 - [F136A_MOUSE]	4	15.6635	151.922	31.16	0.978437	0.976211	0.863939	1.10889	0.970939	0.930158
1427	Q921E2	Ras-related protein Rab-31 OS=Mus musculus GN=Rab31 PE=1 SV=1 - [RAB31_MOUSE]	4	21.3178	151.03	25.26	1.0266	1.00173	1.01223	0.919826	1.05453	1.01434
1428	P62264	40S ribosomal protein S14 OS=Mus musculus GN=Rps14 PE=1 SV=3 - [RS14_MOUSE]	4	16.2625	148.316	23.84	1.11641	0.958233	1.00671	0.991342	1.07452	1.10035
1429	Q924M7	Mannose-6-phosphate isomerase OS=Mus musculus GN=Mpi PE=1 SV=1 - [MPI_MOUSE]	4	46.5447	148.235	14.42	1.05409	0.897599	0.890131	0.999074	0.880682	1.10075
1430	O55026	Ectonucleoside triphosphate diphosphohydrolase 2 OS=Mus musculus GN=Entpd2 PE=1 SV=2 - [ENTP2_MOUSE]	4	54.2848	146.703	9.7	1.08392	0.992229	0.93897	1.04267	0.794665	1.04365
1431	Q62419	Endophilin-A2 OS=Mus musculus GN=Sh3gl1 PE=1 SV=1 - [SH3G1_MOUSE]	4	41.4922	142.896	24.46	0.894076	1.09951	1.07078	0.962472	0.919373	1.04023
1432	Q6PCP5	Mitochondrial fission factor OS=Mus musculus GN=Mff PE=1 SV=1 - [MFF_MOUSE]	4	32.911	142.063	19.93	0.980461	0.867643	0.953333	1.03799	1.09018	0.955124
1433	Q78IK2	Up-regulated during skeletal muscle growth protein 5 OS=Mus musculus GN=Usmg5 PE=1 SV=1 - [USMG5_MOUSE]	4	6.37736	139.028	44.83	0.948184	1.03385	1.0889	1.09416	0.94616	0.954738
1434	P24668	Cation-dependent mannose-6-phosphate receptor OS=Mus musculus GN=M6pr PE=1 SV=1 - [MPRD_MOUSE]	4	31.1524	138.657	18.35	1.10054	0.926434	1.04471	1.08076	1.07725	1.00883
1435	Q9JK42	[Pyruvate dehydrogenase (acetyl-transferring)] kinase isozyme 2, mitochondrial OS=Mus musculus GN=Pdk2 PE=1 SV=2 - [PDK2_MOUSE]	4	46.0111	138.238	10.07	0.915284	1.0114	1.1122	1.0266	1.00348	0.928342
1436	Q8K4Z3	NAD(P)H-hydrate epimerase OS=Mus musculus GN=Naxe PE=1 SV=1 - [NNRE_MOUSE]	4	30.9528	135.105	19.15	1.03768	1.05915	1.07293	0.947674	1.06047	1.03449
1437	Q9JK48	Endophilin-B1 OS=Mus musculus GN=Sh3glb1 PE=1 SV=1 - [SHLB1_MOUSE]	4	40.8298	134.901	14.79	1.07699	0.958422	0.947596	0.9795	0.901386	0.972142
1438	O35381	Acidic leucine-rich nuclear phosphoprotein 32 family member A OS=Mus musculus GN=Anp32a PE=1 SV=1 - [AN32A_MOUSE]	4	28.5202	133.398	25.1	1.07999	1.00292	0.953779	1.08918	0.992283	0.974522
1439	Q9WVA4	Transgelin-2 OS=Mus musculus GN=Tagln2 PE=1 SV=4 - [TAGL2_MOUSE]	4	22.3812	132.305	31.66	1.10618	0.927319	0.965654	0.984002	1.00353	1.01643
1440	Q61081	Hsp90 co-chaperone Cdc37 OS=Mus musculus GN=Cdc37 PE=1 SV=1 - [CDC37_MOUSE]	4	44.5649	131.655	15.83	1.02428	1.08927	0.911801	0.975023	1.04898	0.981831
1441	Q9JHW2	Omega-amidase NIT2 OS=Mus musculus GN=Nit2 PE=1 SV=1 - [NIT2_MOUSE]	4	30.4826	129.604	15.94	0.987858	0.890714	0.867282	1.00281	1.13215	1.10205
1442	P60521	Gamma-aminobutyric acid receptor-associated protein-like 2 OS=Mus musculus GN=Gabarapl2 PE=1 SV=1 - [GBRL2_MOUSE]	4	13.6581	129.445	35.9	1.06383	1.0216	1.03015	1.05889	0.956187	0.967339
1443	O08638	Myosin-11 OS=Mus musculus GN=Myh11 PE=1 SV=1 - [MYH11_MOUSE]	4	226.888	128.949	7.96	0.96004	0.874557	0.928257	1.0039	0.890424	0.989895
1444	Q8R464	Cell adhesion molecule 4 OS=Mus musculus GN=Cadm4 PE=1 SV=1 - [CADM4_MOUSE]	4	42.6968	128.001	14.18	1.01084	0.97908	0.939856	0.915045	1.10318	0.985525
1445	Q91VZ6	Stromal membrane-associated protein 1 OS=Mus musculus GN=Smap1 PE=1 SV=1 - [SMAP1_MOUSE]	4	47.6297	123.617	10.23	1.01452	0.849097	0.880939	1.08518	0.927444	0.891475
1446	P17809	Solute carrier family 2, facilitated glucose transporter member 1 OS=Mus musculus GN=Slc2a1 PE=1 SV=4 - [GTR1_MOUSE]	4	53.9495	120.616	5.08	0.856099	1.08918	1.22725	0.928852	0.908131	0.945796
1447	Q9D6K5	Synaptojanin-2-binding protein OS=Mus musculus GN=Synj2bp PE=1 SV=1 - [SYJ2B_MOUSE]	4	15.8052	119.927	32.41	1.0216	0.912817	1.00905	1.05923	1.06195	0.969958
1448	Q9WVL0	Maleylacetoacetate isomerase OS=Mus musculus GN=Gstz1 PE=1 SV=1 - [MAAI_MOUSE]	4	24.2598	119.616	20.83	1.04226	0.742823	0.764104	1.04872	1.05635	0.982977
1449	Q91VM9	Inorganic pyrophosphatase 2, mitochondrial OS=Mus musculus GN=Ppa2 PE=1 SV=1 - [IPYR2_MOUSE]	4	38.0902	118.74	16.97	1.03672	1.14241	1.17911	1.38061	1.00648	0.980249
1450	Q3UUI3	Acyl-coenzyme A thioesterase THEM4 OS=Mus musculus GN=Them4 PE=1 SV=1 - [THEM4_MOUSE]	4	26.0146	118.131	19.13	0.908846	1.10051	1.17292	1.11754	1.00835	1.06471
1451	Q8BFY6	Peflin OS=Mus musculus GN=Pef1 PE=1 SV=1 - [PEF1_MOUSE]	4	29.209	117.915	18.18	1.02181	0.907051	0.943895	1.00095	1.05439	1.00582
1452	Q80ZJ1	Ras-related protein Rap-2a OS=Mus musculus GN=Rap2a PE=1 SV=2 - [RAP2A_MOUSE]	4	20.6293	117.869	35.52	0.85582	1.03559	0.987783	0.954377	1.05977	0.937144
1453	P62774	Myotrophin OS=Mus musculus GN=Mtpn PE=1 SV=2 - [MTPN_MOUSE]	4	12.8526	116.958	41.53	1.05206	1.00979	1.00328	1.07399	1.01689	1.06241
1454	Q8VDJ3	Vigilin OS=Mus musculus GN=Hdlbp PE=1 SV=1 - [VIGLN_MOUSE]	4	141.655	116.791	4.02	1.04695	0.93841	0.985592	1.02769	1.00659	1.01098
1455	Q9CY27	Very-long-chain enoyl-CoA reductase OS=Mus musculus GN=Tecr PE=1 SV=1 - [TECR_MOUSE]	4	36.0668	116.727	11.36	0.923906	0.995274	1.07584	0.987259	0.965243	0.922799
1456	P35282	Ras-related protein Rab-21 OS=Mus musculus GN=Rab21 PE=1 SV=4 - [RAB21_MOUSE]	4	24.0912	116.456	21.17	0.988428	0.944927	0.934515	0.980428	0.965559	1.00492
1457	Q8K1Z0	Ubiquinone biosynthesis protein COQ9, mitochondrial OS=Mus musculus GN=Coq9 PE=1 SV=1 - [COQ9_MOUSE]	4	35.0605	116.357	15.34	1.08258	1.11173	1.07101	1.09311	1.03034	1.01066
1458	Q9DCZ4	MICOS complex subunit Mic26 OS=Mus musculus GN=Apoo PE=1 SV=2 - [MIC26_MOUSE]	4	22.5896	116.257	21.21	1.03176	1.09392	1.15133	1.03384	0.942347	0.989147
1459	Q9CYG7	Mitochondrial import receptor subunit TOM34 OS=Mus musculus GN=Tomm34 PE=1 SV=1 - [TOM34_MOUSE]	4	34.2568	113.317	18.12	1.09589	0.803624	0.846025	1.11256	1.20584	0.933592
1460	Q9CR67	Transmembrane protein 33 OS=Mus musculus GN=Tmem33 PE=1 SV=1 - [TMM33_MOUSE]	4	28.0128	112.606	14.98	1.03314	0.945209	1.06695	1.01813	1.03967	0.998951
1461	Q91WK2	Eukaryotic translation initiation factor 3 subunit H OS=Mus musculus GN=Eif3h PE=1 SV=1 - [EIF3H_MOUSE]	4	39.807	112.018	15.34	1.01903	0.987659	1.04993	1.04405	0.988214	0.97621
1462	Q9DCN2	NADH-cytochrome b5 reductase 3 OS=Mus musculus GN=Cyb5r3 PE=1 SV=3 - [NB5R3_MOUSE]	4	34.1057	111.925	15.95	1.01477	1.04935	0.937065	1.01173	0.999495	0.958143
1463	Q9CR51	V-type proton ATPase subunit G 1 OS=Mus musculus GN=Atp6v1g1 PE=1 SV=3 - [VATG1_MOUSE]	4	13.716	111.456	25.42	1.04498	0.980677	1.00565	1.04792	0.971506	1.12762
1464	Q99JY8	Phospholipid phosphatase 3 OS=Mus musculus GN=Plpp3 PE=1 SV=1 - [PLPP3_MOUSE]	4	35.1931	111.328	11.54	1.02119	0.964194	1.03025	0.977276	0.991364	0.972386
1465	P28656	Nucleosome assembly protein 1-like 1 OS=Mus musculus GN=Nap1l1 PE=1 SV=2 - [NP1L1_MOUSE]	4	45.3169	111.221	14.32	1.02021	1.0554	1.00506	1.01509	0.944191	1.04414
1466	Q9JJU8	SH3 domain-binding glutamic acid-rich-like protein OS=Mus musculus GN=Sh3bgrl PE=1 SV=1 - [SH3L1_MOUSE]	4	12.8032	110.601	46.49	0.984812	0.927886	0.892127	1.06272	1.08882	1.02084
1467	Q9DBP5	UMP-CMP kinase OS=Mus musculus GN=Cmpk1 PE=1 SV=1 - [KCY_MOUSE]	4	22.1513	109.589	20.92	1.0993	1.00274	0.917327	1.06133	1.05092	1.03077
1468	O54901	OX-2 membrane glycoprotein OS=Mus musculus GN=Cd200 PE=1 SV=1 - [OX2G_MOUSE]	4	31.236	107.765	18.35	0.901922	1.05061	1.05271	0.991224	0.96622	0.915454
1469	O35405	Phospholipase D3 OS=Mus musculus GN=Pld3 PE=1 SV=1 - [PLD3_MOUSE]	4	54.3544	106.163	8.4	1.08133	0.971565	0.949	0.927845	1.12859	1.00233
1470	P62627	Dynein light chain roadblock-type 1 OS=Mus musculus GN=Dynlrb1 PE=1 SV=3 - [DLRB1_MOUSE]	4	10.9828	105.033	43.75	1.08309	0.928968	0.896198	0.935489	1.20426	1.07426
1471	Q8BLJ3	PI-PLC X domain-containing protein 3 OS=Mus musculus GN=Plcxd3 PE=1 SV=1 - [PLCX3_MOUSE]	4	36.2904	103.626	15.89	0.927048	0.949942	0.972608	0.930013	1.05772	1.01449
1472	Q9Z1Z0	General vesicular transport factor p115 OS=Mus musculus GN=Uso1 PE=1 SV=2 - [USO1_MOUSE]	4	106.917	100.828	4.69	0.954048	1.02888	1.06166	1.03024	0.990567	0.926841
1473	Q9D710	Thioredoxin-related transmembrane protein 2 OS=Mus musculus GN=Tmx2 PE=1 SV=1 - [TMX2_MOUSE]	4	33.9206	99.0359	15.93	0.920293	1.01194	1.10266	1.05059	0.965281	0.969123
1474	Q9D379	Epoxide hydrolase 1 OS=Mus musculus GN=Ephx1 PE=1 SV=2 - [HYEP_MOUSE]	4	52.543	98.1979	7.91	0.93147	0.943898	0.937424	1.07326	1.06227	1.0034
1475	P63054	Calmodulin regulator protein PCP4 OS=Mus musculus GN=Pcp4 PE=3 SV=2 - [PCP4_MOUSE]	4	6.80329	97.589	58.06	0.974633	0.939595	0.92736	1.03049	1.05417	1.10393
1476	Q02819	Nucleobindin-1 OS=Mus musculus GN=Nucb1 PE=1 SV=2 - [NUCB1_MOUSE]	4	53.3759	97.3683	9.59	1.02028	0.977629	0.929318	1.05177	1.08075	0.991397
1477	Q99JX3	Golgi reassembly-stacking protein 2 OS=Mus musculus GN=Gorasp2 PE=1 SV=3 - [GORS2_MOUSE]	4	47.0088	96.371	14.41	1.1099	0.979822	0.958572	0.989182	0.995654	1.02655
1478	Q9CPW4	Actin-related protein 2/3 complex subunit 5 OS=Mus musculus GN=Arpc5 PE=1 SV=3 - [ARPC5_MOUSE]	4	16.2783	95.8844	25.17	1.11371	0.853483	0.932736	1.00317	1.12405	1.07741
1479	Q3UJU9	Regulator of microtubule dynamics protein 3 OS=Mus musculus GN=Rmdn3 PE=1 SV=2 - [RMD3_MOUSE]	4	51.997	94.6861	8.09	1.00455	0.956662	1.01395	0.948658	1.09	1.20854
1480	Q9D0J8	Parathymosin OS=Mus musculus GN=Ptms PE=1 SV=3 - [PTMS_MOUSE]	4	11.4231	93.5151	29.7	1.06068	1.11399	1.00588	1.00102	0.979358	0.995839
1481	P16045	Galectin-1 OS=Mus musculus GN=Lgals1 PE=1 SV=3 - [LEG1_MOUSE]	4	14.8562	90.8004	33.33	1.2594	0.858236	0.945203	1.17086	0.914028	1.02769
1482	O88998	Noelin OS=Mus musculus GN=Olfm1 PE=1 SV=1 - [NOE1_MOUSE]	4	55.3625	90.745	8.45	0.940331	0.970009	1.02526	0.964511	0.91184	0.902613
1483	Q8K2T1	NmrA-like family domain-containing protein 1 OS=Mus musculus GN=Nmral1 PE=1 SV=1 - [NMRL1_MOUSE]	4	34.3546	90.5751	17.48	1.10327	0.996131	0.813796	0.865025	1.13183	1.0884
1484	P18572	Basigin OS=Mus musculus GN=Bsg PE=1 SV=2 - [BASI_MOUSE]	4	42.4183	89.7584	11.83	0.901769	1.05245	1.12749	0.901125	1.02014	0.978754
1485	P47199	Quinone oxidoreductase OS=Mus musculus GN=Cryz PE=1 SV=1 - [QOR_MOUSE]	4	35.2464	87.8834	13.9	0.944428	1.05763	1.08807	1.06184	0.958701	0.966391
1486	P62996	Transformer-2 protein homolog beta OS=Mus musculus GN=Tra2b PE=1 SV=1 - [TRA2B_MOUSE]	4	33.6456	87.4162	21.18	1.14639	1.04308	1.19763	0.967194	1.02362	1.11909
1487	Q61595	Kinectin OS=Mus musculus GN=Ktn1 PE=1 SV=1 - [KTN1_MOUSE]	4	152.498	87.3819	3.32	0.971741	0.948605	0.914451	1.02431	0.988173	1.02108
1488	Q5U3K5	Rab-like protein 6 OS=Mus musculus GN=Rabl6 PE=1 SV=2 - [RABL6_MOUSE]	4	79.7817	86.9756	8	1.1843	0.805303	0.847667	1.06441	0.970261	0.857497
1489	Q9JMH6	Thioredoxin reductase 1, cytoplasmic OS=Mus musculus GN=Txnrd1 PE=1 SV=3 - [TRXR1_MOUSE]	4	67.042	86.4915	7.01	1.0435	1.07929	1.03944	1.03177	1.0618	0.99263
1490	P47915	60S ribosomal protein L29 OS=Mus musculus GN=Rpl29 PE=1 SV=2 - [RL29_MOUSE]	4	17.5759	85.7291	17.5	0.956709	1.06515	1.10112	1.01898	0.998562	1.04313
1491	P56395	Cytochrome b5 OS=Mus musculus GN=Cyb5a PE=1 SV=2 - [CYB5_MOUSE]	4	15.2315	85.2788	29.85	0.980219	1.05104	0.982817	0.96287	1.02118	1.01136
1492	Q3UHX2	28 kDa heat- and acid-stable phosphoprotein OS=Mus musculus GN=Pdap1 PE=1 SV=1 - [HAP28_MOUSE]	4	20.5925	84.7224	25.97	0.986793	0.953238	1.10995	1.05308	0.977413	0.983036
1493	P51830	Adenylate cyclase type 9 OS=Mus musculus GN=Adcy9 PE=1 SV=1 - [ADCY9_MOUSE]	4	150.857	84.2671	3.84	1.03274	0.864957	0.804712	0.943676	1.0282	1.02703
1494	Q2NL51	Glycogen synthase kinase-3 alpha OS=Mus musculus GN=Gsk3a PE=1 SV=2 - [GSK3A_MOUSE]	4	51.6284	83.7909	18.98	0.955257	1.04372	0.926833	1.1543	1.0205	0.938325
1495	Q9CWK8	Sorting nexin-2 OS=Mus musculus GN=Snx2 PE=1 SV=2 - [SNX2_MOUSE]	4	58.4348	82.9908	12.72	0.92832	0.925108	1.01327	0.957206	0.943103	1.03157
1496	P70290	55 kDa erythrocyte membrane protein OS=Mus musculus GN=Mpp1 PE=1 SV=1 - [EM55_MOUSE]	4	52.1945	82.889	12.66	1.06764	0.963297	1.03764	0.986692	0.957195	0.917387
1497	P60904	DnaJ homolog subfamily C member 5 OS=Mus musculus GN=Dnajc5 PE=1 SV=1 - [DNJC5_MOUSE]	4	22.0863	81.6418	12.12	0.850913	1.33688	1.30924	1.02244	0.949127	0.965734
1498	Q9Z1Q9	Valine--tRNA ligase OS=Mus musculus GN=Vars PE=1 SV=1 - [SYVC_MOUSE]	4	140.127	81.5004	3.64	1.0577	0.987195	1.06343	0.905396	1.17264	1.03589
1499	Q9QUH0	Glutaredoxin-1 OS=Mus musculus GN=Glrx PE=1 SV=3 - [GLRX1_MOUSE]	4	11.8631	80.531	36.45	1.02285	0.972142	1.07853	1.00079	0.991504	1.04306
1500	Q99JP7	Glutathione hydrolase 7 OS=Mus musculus GN=Ggt7 PE=1 SV=2 - [GGT7_MOUSE]	4	70.2076	80.4697	8.91	0.96008	1.06784	1.1695	0.967426	1.01986	0.988487
1501	Q99LS3	Phosphoserine phosphatase OS=Mus musculus GN=Psph PE=1 SV=1 - [SERB_MOUSE]	4	25.0799	80.1883	21.33	1.02512	1.04181	0.834182	1.09325	1.0333	0.938923
1502	Q80TQ2	Ubiquitin carboxyl-terminal hydrolase CYLD OS=Mus musculus GN=Cyld PE=1 SV=2 - [CYLD_MOUSE]	4	106.517	80.1486	5.15	0.8482	0.927055	0.98281	0.975996	1.07666	1.02417
1503	Q8CDN6	Thioredoxin-like protein 1 OS=Mus musculus GN=Txnl1 PE=1 SV=3 - [TXNL1_MOUSE]	4	32.2167	79.8246	14.53	1.02969	0.977135	0.975991	0.992693	1.05903	1.09922
1504	Q9Z0P5	Twinfilin-2 OS=Mus musculus GN=Twf2 PE=1 SV=1 - [TWF2_MOUSE]	4	39.4464	78.733	15.76	0.98435	1.10633	1.12476	0.998592	1.00767	0.976622
1505	P59281	Rho GTPase-activating protein 39 OS=Mus musculus GN=Arhgap39 PE=1 SV=2 - [RHG39_MOUSE]	4	125.127	78.5058	4.07	0.92214	1.04006	0.931094	0.904856	0.999798	0.9993
1506	Q9D1P4	Cysteine and histidine-rich domain-containing protein 1 OS=Mus musculus GN=Chordc1 PE=1 SV=1 - [CHRD1_MOUSE]	4	37.3267	78.2707	16.31	1.06305	1.02596	1.02391	0.97311	0.980023	1.05912
1507	P26041	Moesin OS=Mus musculus GN=Msn PE=1 SV=3 - [MOES_MOUSE]	4	67.7249	77.9128	14.73	1.22659	1.04908	1.17233	1.10417	0.986895	1.08146
1508	Q9CR21	Acyl carrier protein, mitochondrial OS=Mus musculus GN=Ndufab1 PE=1 SV=1 - [ACPM_MOUSE]	4	17.359	77.7884	19.23	0.91015	1.07675	1.14891	1.0899	1.01434	0.924538
1509	Q80Y24	Prickle-like protein 2 OS=Mus musculus GN=Prickle2 PE=1 SV=3 - [PRIC2_MOUSE]	4	95.7196	77.2467	5.09	1.0125	0.881133	0.862242	0.955111	0.984479	0.996105
1510	Q91X72	Hemopexin OS=Mus musculus GN=Hpx PE=1 SV=2 - [HEMO_MOUSE]	4	51.2852	77.0206	11.09	0.853593	1.04298	1.04992	0.768577	1.05972	1.08808
1511	Q99JB2	Stomatin-like protein 2, mitochondrial OS=Mus musculus GN=Stoml2 PE=1 SV=1 - [STML2_MOUSE]	4	38.3612	76.2496	12.18	1.01766	0.933422	0.852408	1.04258	0.971306	1.01694
1512	Q80X80	Phospholipid transfer protein C2CD2L OS=Mus musculus GN=C2cd2l PE=1 SV=3 - [C2C2L_MOUSE]	4	76.282	76.2014	5.52	0.987626	1.06447	1.08179	0.95901	0.984622	0.964053
1513	Q61686	Chromobox protein homolog 5 OS=Mus musculus GN=Cbx5 PE=1 SV=1 - [CBX5_MOUSE]	4	22.172	75.826	22.51	1.07898	1.00756	1.01792	1.04758	1.00649	0.950073
1514	Q60996	Serine/threonine-protein phosphatase 2A 56 kDa regulatory subunit gamma isoform OS=Mus musculus GN=Ppp2r5c PE=1 SV=2 - [2A5G_MOUSE]	4	60.7854	74.7795	10.88	0.960379	1.02784	1.03646	0.977941	1.01839	1.02486
1515	P18052	Receptor-type tyrosine-protein phosphatase alpha OS=Mus musculus GN=Ptpra PE=1 SV=3 - [PTPRA_MOUSE]	4	93.6383	74.6961	6.15	0.982931	0.971156	0.901461	0.993981	1.08129	0.96843
1516	Q9JL62	Glycolipid transfer protein OS=Mus musculus GN=Gltp PE=1 SV=3 - [GLTP_MOUSE]	4	23.6744	74.5105	20.57	1.13586	1.05319	0.886764	0.866083	1.30062	1.20424
1517	Q14BB9	MAP6 domain-containing protein 1 OS=Mus musculus GN=Map6d1 PE=1 SV=1 - [MA6D1_MOUSE]	4	20.4202	74.4	32.98	1.11055	0.949978	0.850615	1.08317	1.03691	1.04135
1518	Q80U40	RIMS-binding protein 2 OS=Mus musculus GN=Rimbp2 PE=1 SV=3 - [RIMB2_MOUSE]	4	118.269	74.1505	5.69	1.07982	0.943152	0.926421	0.874531	1.055	0.984903
1519	Q8BSS9	Liprin-alpha-2 OS=Mus musculus GN=Ppfia2 PE=1 SV=2 - [LIPA2_MOUSE]	4	143.146	73.992	5.33	1.16128	0.793004	0.791012	0.996087	0.98127	1.06561
1520	P28667	MARCKS-related protein OS=Mus musculus GN=Marcksl1 PE=1 SV=2 - [MRP_MOUSE]	4	20.1534	73.5869	22	1.00648	0.968007	0.839346	0.851543	1.0562	1.00823
1521	Q99L04	Dehydrogenase/reductase SDR family member 1 OS=Mus musculus GN=Dhrs1 PE=1 SV=1 - [DHRS1_MOUSE]	4	33.9834	73.5803	15.34	1.0201	1.00693	1.02717	1.00236	0.927436	0.978342
1522	Q9WU28	Prefoldin subunit 5 OS=Mus musculus GN=Pfdn5 PE=1 SV=1 - [PFD5_MOUSE]	4	17.345	73.5295	36.36	1.01383	1.02023	0.936274	1.01824	1.02079	1.07109
1523	Q922E4	Ethanolamine-phosphate cytidylyltransferase OS=Mus musculus GN=Pcyt2 PE=1 SV=1 - [PCY2_MOUSE]	4	45.2066	73.3376	8.91	1.11789	0.919494	0.899727	1.08313	0.941022	1.12008
1524	Q3TES0	IQ motif and SEC7 domain-containing protein 3 OS=Mus musculus GN=Iqsec3 PE=1 SV=1 - [IQEC3_MOUSE]	4	129.038	72.9212	6.61	0.984439	1.07139	1.05723	0.942876	1.11696	0.968197
1525	Q80WC7	Arf-GAP domain and FG repeat-containing protein 2 OS=Mus musculus GN=Agfg2 PE=1 SV=1 - [AGFG2_MOUSE]	4	48.9374	72.6061	8.35	0.997048	0.918358	0.840429	1.06911	1.00262	1.06896
1526	P67871	Casein kinase II subunit beta OS=Mus musculus GN=Csnk2b PE=1 SV=1 - [CSK2B_MOUSE]	4	24.926	72.5137	20.93	1.10246	0.951125	0.95585	0.941293	1.00861	1.00962
1527	Q03157	Amyloid-like protein 1 OS=Mus musculus GN=Aplp1 PE=1 SV=1 - [APLP1_MOUSE]	4	72.7054	72.0782	9.04	0.933771	0.928818	0.929376	1.05332	0.935218	0.93625
1528	P63089	Pleiotrophin OS=Mus musculus GN=Ptn PE=1 SV=1 - [PTN_MOUSE]	4	18.8566	72.0598	33.33	1.21221	1.07861	1.03375	1.04818	0.919041	0.972352
1529	Q8CGU1	Calcium-binding and coiled-coil domain-containing protein 1 OS=Mus musculus GN=Calcoco1 PE=1 SV=2 - [CACO1_MOUSE]	4	77.2324	71.3018	7.67	0.922218	0.944523	0.997733	1.02594	1.04916	0.942469
1530	Q9Z2W9	Glutamate receptor 3 OS=Mus musculus GN=Gria3 PE=1 SV=2 - [GRIA3_MOUSE]	4	100.463	70.3539	10.25	0.848253	1.26916	1.37446	1.04785	0.866232	0.900114
1531	Q99JF8	PC4 and SFRS1-interacting protein OS=Mus musculus GN=Psip1 PE=1 SV=1 - [PSIP1_MOUSE]	4	59.6605	69.9411	10.04	1.0706	1.03581	0.971694	0.949909	0.984595	1.03947
1532	Q9DBS2	Tumor protein p63-regulated gene 1-like protein OS=Mus musculus GN=Tprg1l PE=1 SV=1 - [TPRGL_MOUSE]	4	29.7954	68.9363	16.92	1.07595	1.04201	0.980702	1.04044	1.10945	1.02252
1533	Q99KY4	Cyclin-G-associated kinase OS=Mus musculus GN=Gak PE=1 SV=2 - [GAK_MOUSE]	4	143.55	68.6117	4.44	0.996517	1.20367	1.15402	1.03772	0.957849	0.982264
1534	Q9D1Q6	Endoplasmic reticulum resident protein 44 OS=Mus musculus GN=Erp44 PE=1 SV=1 - [ERP44_MOUSE]	4	46.8233	68.5646	12.32	0.99326	1.06052	1.09195	0.950791	1.02644	1.04847
1535	Q920N7	Synaptotagmin-12 OS=Mus musculus GN=Syt12 PE=1 SV=1 - [SYT12_MOUSE]	4	46.651	68.5542	13.54	0.808791	1.00195	0.951116	1.08408	0.917047	0.913293
1536	P62911	60S ribosomal protein L32 OS=Mus musculus GN=Rpl32 PE=1 SV=2 - [RL32_MOUSE]	4	15.8498	68.4975	23.7	1.11309	0.914299	1.00222	1.09256	1.04061	0.967205
1537	P28798	Granulins OS=Mus musculus GN=Grn PE=1 SV=2 - [GRN_MOUSE]	4	63.4131	68.3748	9.68	1.4436	0.986943	0.854556	1.07852	1.00507	0.949013
1538	Q91VW3	SH3 domain-binding glutamic acid-rich-like protein 3 OS=Mus musculus GN=Sh3bgrl3 PE=1 SV=1 - [SH3L3_MOUSE]	4	10.4703	68.0586	39.78	1.22639	0.756393	0.80272	1.00452	1.106	1.06102
1539	Q6PDL0	Cytoplasmic dynein 1 light intermediate chain 2 OS=Mus musculus GN=Dync1li2 PE=1 SV=2 - [DC1L2_MOUSE]	4	54.1846	67.9375	12.2	1.01578	0.987192	1.0759	0.983377	0.973144	0.951413
1540	Q99KR7	Peptidyl-prolyl cis-trans isomerase F, mitochondrial OS=Mus musculus GN=Ppif PE=1 SV=1 - [PPIF_MOUSE]	4	21.723	67.7461	29.13	0.93181	1.13745	1.16613	1.05344	0.947396	1.0143
1541	Q9R1C6	Diacylglycerol kinase epsilon OS=Mus musculus GN=Dgke PE=1 SV=1 - [DGKE_MOUSE]	4	63.5927	66.6562	9.93	0.917423	1.05678	1.21247	0.940545	0.951453	0.949993
1542	O08848	60 kDa SS-A/Ro ribonucleoprotein OS=Mus musculus GN=Trove2 PE=1 SV=1 - [RO60_MOUSE]	4	60.0851	66.1307	7.43	1.03959	1.09159	0.930497	1.05721	0.975684	0.864808
1543	Q9DCC4	Pyrroline-5-carboxylate reductase 3 OS=Mus musculus GN=Pycr3 PE=1 SV=2 - [P5CR3_MOUSE]	4	28.7027	64.4046	17.88	1.04851	0.98418	0.965728	1.03618	0.975276	0.981716
1544	Q91XU3	Phosphatidylinositol 5-phosphate 4-kinase type-2 gamma OS=Mus musculus GN=Pip4k2c PE=1 SV=1 - [PI42C_MOUSE]	4	47.3061	64.2219	10.93	0.887437	1.1412	1.17435	1.03459	1.03351	1.03517
1545	P97429	Annexin A4 OS=Mus musculus GN=Anxa4 PE=1 SV=4 - [ANXA4_MOUSE]	4	35.8931	63.6887	18.18	1.18546	0.892874	0.921805	1.15058	1.02792	0.935951
1546	Q8C729	Protein FAM126B OS=Mus musculus GN=Fam126b PE=1 SV=1 - [F126B_MOUSE]	4	58.5499	63.2662	7.36	0.961901	0.897027	1.11046	0.952687	0.984857	0.987894
1547	Q71M36	Chondroitin sulfate proteoglycan 5 OS=Mus musculus GN=Cspg5 PE=1 SV=2 - [CSPG5_MOUSE]	4	60.368	62.9479	6.71	0.979159	1.01363	0.991813	1.04535	0.904258	0.913643
1548	Q99KK7	Dipeptidyl peptidase 3 OS=Mus musculus GN=Dpp3 PE=1 SV=2 - [DPP3_MOUSE]	4	82.8461	62.8956	7.59	1.04239	0.938525	0.974207	1.06977	1.01376	1.00715
1549	Q9D7B6	Isobutyryl-CoA dehydrogenase, mitochondrial OS=Mus musculus GN=Acad8 PE=1 SV=2 - [ACAD8_MOUSE]	4	44.9904	62.2994	14.04	1.10659	1.02599	0.96154	1.03967	1.09972	0.988095
1550	Q9Z1F9	SUMO-activating enzyme subunit 2 OS=Mus musculus GN=Uba2 PE=1 SV=1 - [SAE2_MOUSE]	4	70.5247	62.2708	6.9	1.03723	0.918248	0.835663	0.997181	1.06958	1.02359
1551	O54833	Casein kinase II subunit alpha' OS=Mus musculus GN=Csnk2a2 PE=1 SV=1 - [CSK22_MOUSE]	4	41.1891	61.5189	16.57	1.06342	0.944685	1.07141	0.98471	1.11236	0.980667
1552	Q60737	Casein kinase II subunit alpha OS=Mus musculus GN=Csnk2a1 PE=1 SV=2 - [CSK21_MOUSE]	4	45.1048	61.2608	13.3	0.909295	1.06988	1.07298	0.991408	1.07176	1.0549
1553	Q61234	Alpha-1-syntrophin OS=Mus musculus GN=Snta1 PE=1 SV=1 - [SNTA1_MOUSE]	4	53.6316	60.9547	8.95	1.09753	0.92945	0.994258	0.961665	1.10206	1.04029
1554	Q9CQX8	28S ribosomal protein S36, mitochondrial OS=Mus musculus GN=Mrps36 PE=1 SV=1 - [RT36_MOUSE]	4	11.0938	60.659	47.06	1.07277	0.963184	0.944885	1.00052	0.892307	1.02065
1555	P99026	Proteasome subunit beta type-4 OS=Mus musculus GN=Psmb4 PE=1 SV=1 - [PSB4_MOUSE]	4	29.0973	60.4941	15.91	1.09373	0.907491	0.989945	1.01229	1.01407	0.99764
1556	Q8VBW6	NEDD8-activating enzyme E1 regulatory subunit OS=Mus musculus GN=Nae1 PE=1 SV=1 - [ULA1_MOUSE]	4	60.2357	60.4228	6.93	1.02107	1.05314	1.08341	0.916882	0.97621	1.07716
1557	P68037	Ubiquitin-conjugating enzyme E2 L3 OS=Mus musculus GN=Ube2l3 PE=1 SV=1 - [UB2L3_MOUSE]	4	17.8502	60.2535	33.12	1.03562	1.08929	0.998215	1.02372	1.09907	1.06517
1558	P53395	Lipoamide acyltransferase component of branched-chain alpha-keto acid dehydrogenase complex, mitochondrial OS=Mus musculus GN=Dbt PE=1 SV=2 - [ODB2_MOUSE]	4	53.2129	59.9496	8.92	0.961136	1.17991	1.07902	0.922268	0.904459	1.09376
1559	Q8BUK6	Protein Hook homolog 3 OS=Mus musculus GN=Hook3 PE=1 SV=2 - [HOOK3_MOUSE]	4	83.1665	59.1946	6.82	0.99185	0.998571	1.0006	0.989639	1.11692	0.987347
1560	P63073	Eukaryotic translation initiation factor 4E OS=Mus musculus GN=Eif4e PE=1 SV=1 - [IF4E_MOUSE]	4	25.0375	59.1154	18.43	1.03518	1.03153	0.958364	1.00836	1.01511	1.0265
1561	Q3UGY8	Brefeldin A-inhibited guanine nucleotide-exchange protein 3 OS=Mus musculus GN=Arfgef3 PE=1 SV=1 - [BIG3_MOUSE]	4	239.938	58.935	2.12	1.24809	0.971455	0.917403	1.07536	1.05958	0.954674
1562	Q9DC28	Casein kinase I isoform delta OS=Mus musculus GN=Csnk1d PE=1 SV=2 - [KC1D_MOUSE]	4	47.2862	58.0755	13.01	0.929932	1.2995	0.96131	1.04188	0.926846	1.02162
1563	P11031	Activated RNA polymerase II transcriptional coactivator p15 OS=Mus musculus GN=Sub1 PE=1 SV=3 - [TCP4_MOUSE]	4	14.4184	57.9749	28.35	1.16711	0.923321	0.959296	1.00508	1.06387	1.02935
1564	P46061	Ran GTPase-activating protein 1 OS=Mus musculus GN=Rangap1 PE=1 SV=2 - [RAGP1_MOUSE]	4	63.4914	57.8736	7.98	0.999712	1.10882	1.04125	1.03871	1.0304	1.00609
1565	Q9JMG7	Hepatoma-derived growth factor-related protein 3 OS=Mus musculus GN=Hdgfl3 PE=1 SV=2 - [HDGR3_MOUSE]	4	22.4169	57.3802	20.3	0.944611	1.17791	0.932468	0.978541	0.931987	0.963576
1566	Q6A0A9	Constitutive coactivator of PPAR-gamma-like protein 1 OS=Mus musculus GN=FAM120A PE=1 SV=2 - [F120A_MOUSE]	4	121.569	57.3536	4.41	0.988989	0.892254	0.965516	0.994015	1.11384	1.03231
1567	P62073	Mitochondrial import inner membrane translocase subunit Tim10 OS=Mus musculus GN=Timm10 PE=1 SV=1 - [TIM10_MOUSE]	4	10.3259	57.234	32.22	0.995564	1.00583	0.975421	1.05352	1.01731	0.978413
1568	Q8CG76	Aflatoxin B1 aldehyde reductase member 2 OS=Mus musculus GN=Akr7a2 PE=1 SV=3 - [ARK72_MOUSE]	4	40.5862	55.9207	13.08	1.01352	1.02241	1.07369	0.90284	1.0091	1.03139
1569	P50429	Arylsulfatase B OS=Mus musculus GN=Arsb PE=1 SV=3 - [ARSB_MOUSE]	4	59.609	55.8513	8.05	0.990817	0.986546	0.89999	1.01676	0.991993	1.03428
1570	Q9QZD9	Eukaryotic translation initiation factor 3 subunit I OS=Mus musculus GN=Eif3i PE=1 SV=1 - [EIF3I_MOUSE]	4	36.4376	55.2738	13.54	1.11904	0.936612	0.919274	1.06906	1.04747	1.02035
1571	Q8BG51	Mitochondrial Rho GTPase 1 OS=Mus musculus GN=Rhot1 PE=1 SV=1 - [MIRO1_MOUSE]	4	72.1956	54.8815	9.67	0.980754	0.946231	1.01315	1.15655	0.861874	0.851335
1572	Q3UHB8	Coiled-coil domain-containing protein 177 OS=Mus musculus GN=Ccdc177 PE=1 SV=1 - [CC177_MOUSE]	4	79.8094	54.8521	5.81	0.893343	1.02316	1.01697	1.00634	1.00439	1.0136
1573	Q61205	Platelet-activating factor acetylhydrolase IB subunit gamma OS=Mus musculus GN=Pafah1b3 PE=1 SV=1 - [PA1B3_MOUSE]	4	25.8373	54.69	14.22	0.943302	0.955922	0.792721	0.808083	1.10904	1.10129
1574	B9EJ86	Oxysterol-binding protein-related protein 8 OS=Mus musculus GN=Osbpl8 PE=1 SV=1 - [OSBL8_MOUSE]	4	101.205	54.4301	5.29	0.896765	1.10881	1.17747	0.974083	1.01742	1.06198
1575	O08915	AH receptor-interacting protein OS=Mus musculus GN=Aip PE=1 SV=1 - [AIP_MOUSE]	4	37.5811	53.7234	13.94	0.960542	1.04042	0.960193	0.965915	0.993413	1.0678
1576	Q9D7S9	Charged multivesicular body protein 5 OS=Mus musculus GN=Chmp5 PE=1 SV=1 - [CHMP5_MOUSE]	4	24.5603	53.3366	23.29	1.02982	0.992689	0.940315	0.974325	1.06406	1.1113
1577	P28184	Metallothionein-3 OS=Mus musculus GN=Mt3 PE=1 SV=1 - [MT3_MOUSE]	4	7.00366	53.2611	63.24	1.11797	1.01959	1.03515	1.16964	1.01183	1.20285
1578	Q9EQ80	NIF3-like protein 1 OS=Mus musculus GN=Nif3l1 PE=1 SV=4 - [NIF3L_MOUSE]	4	41.7194	52.9849	11.7	1.01743	0.914947	0.935525	0.997462	1.04025	0.912878
1579	O35454	Chloride transport protein 6 OS=Mus musculus GN=Clcn6 PE=1 SV=1 - [CLCN6_MOUSE]	4	96.9173	52.74	5.4	1.12	0.837852	0.877725	1.18203	0.939866	0.969545
1580	Q9QWW1	Homer protein homolog 2 OS=Mus musculus GN=Homer2 PE=1 SV=1 - [HOME2_MOUSE]	4	40.5454	52.5887	15.25	0.856337	1.04717	1.05254	1.00032	0.992903	1.00384
1581	O88746	Target of Myb protein 1 OS=Mus musculus GN=Tom1 PE=1 SV=1 - [TOM1_MOUSE]	4	54.2912	52.2831	10.16	0.993671	0.945603	0.932438	1.02332	1.00072	0.98036
1582	Q9Z1J3	Cysteine desulfurase, mitochondrial OS=Mus musculus GN=Nfs1 PE=1 SV=3 - [NFS1_MOUSE]	4	50.538	51.903	9.37	1.07478	0.887793	0.956747	1.0625	0.972492	1.00148
1583	Q9CQF9	Prenylcysteine oxidase OS=Mus musculus GN=Pcyox1 PE=1 SV=1 - [PCYOX_MOUSE]	4	56.4587	51.741	11.29	0.932964	0.981267	1.06324	0.970672	0.951527	0.927281
1584	Q9Z0Y1	Dynactin subunit 3 OS=Mus musculus GN=Dctn3 PE=1 SV=2 - [DCTN3_MOUSE]	4	20.9653	51.42	19.35	1.04977	0.847966	1.12261	1.11685	1.03609	0.977981
1585	Q8BXR1	Probable cationic amino acid transporter OS=Mus musculus GN=Slc7a14 PE=1 SV=1 - [S7A14_MOUSE]	4	83.9288	50.4303	6.1	0.945043	1.10133	1.02915	1.019	0.91898	1.12262
1586	Q8VHQ9	Acyl-coenzyme A thioesterase 11 OS=Mus musculus GN=Acot11 PE=1 SV=1 - [ACO11_MOUSE]	4	67.3117	49.5535	6.23	0.708172	0.865505	1.09776	0.911328	1.12085	1.13462
1587	Q99KC8	von Willebrand factor A domain-containing protein 5A OS=Mus musculus GN=Vwa5a PE=1 SV=2 - [VMA5A_MOUSE]	4	87.0874	49.3347	4.67	0.802399	0.824724	0.920109	1.02583	1.10019	1.05572
1588	Q80ZW2	Protein THEM6 OS=Mus musculus GN=Them6 PE=1 SV=1 - [THEM6_MOUSE]	4	23.7876	49.2027	19.32	1.08274	0.8687	0.95159	0.950559	1.09383	0.946448
1589	Q9Z0J4	Nitric oxide synthase, brain OS=Mus musculus GN=Nos1 PE=1 SV=1 - [NOS1_MOUSE]	4	160.371	48.9132	3.36	1.03363	1.06036	0.798201	0.981951	1.02091	1.00539
1590	O88545	COP9 signalosome complex subunit 6 OS=Mus musculus GN=Cops6 PE=1 SV=1 - [CSN6_MOUSE]	4	35.857	48.5424	12.04	0.917242	1.09653	1.02241	1.10901	0.931719	0.950481
1591	Q68FD9	UPF0606 protein KIAA1549 OS=Mus musculus GN=Kiaa1549 PE=1 SV=3 - [K1549_MOUSE]	4	209.092	48.3539	2.47	1.09615	0.866573	0.816829	0.862872	0.9365	0.909792
1592	P37804	Transgelin OS=Mus musculus GN=Tagln PE=1 SV=3 - [TAGL_MOUSE]	4	22.5614	46.9905	27.86	0.969365	0.752269	0.901226	1.05522	0.759408	0.886281
1593	Q8K4Z0	Leucine-rich repeat LGI family member 2 OS=Mus musculus GN=Lgi2 PE=2 SV=1 - [LGI2_MOUSE]	4	62.9658	46.732	7.64	0.870608	1.04079	0.989589	0.948918	0.944523	1.07139
1594	Q9JKK1	Syntaxin-6 OS=Mus musculus GN=Stx6 PE=1 SV=1 - [STX6_MOUSE]	4	28.9788	46.5151	20	1.07047	1.01902	0.892527	0.987463	1.00974	1.00522
1595	Q62083	PRKCA-binding protein OS=Mus musculus GN=Pick1 PE=1 SV=2 - [PICK1_MOUSE]	4	46.5675	46.0891	9.62	0.927892	0.99232	1.05958	1.00587	0.982277	0.941336
1596	Q6PDG5	SWI/SNF complex subunit SMARCC2 OS=Mus musculus GN=Smarcc2 PE=1 SV=2 - [SMRC2_MOUSE]	4	132.522	46.0593	3.96	1.06503	0.830695	0.886766	1.02382	0.953041	0.966154
1597	Q9D0T1	NHP2-like protein 1 OS=Mus musculus GN=Snu13 PE=1 SV=4 - [NH2L1_MOUSE]	4	14.1646	45.2812	33.59	0.971916	0.976787	0.88387	1.08423	0.912698	0.946724
1598	Q9DCR2	AP-3 complex subunit sigma-1 OS=Mus musculus GN=Ap3s1 PE=1 SV=2 - [AP3S1_MOUSE]	4	21.7181	45.2756	21.24	1.09143	0.961886	0.959998	1.0209	1.09541	1.06893
1599	Q9DB72	BTB/POZ domain-containing protein 17 OS=Mus musculus GN=Btbd17 PE=1 SV=1 - [BTBDH_MOUSE]	4	52.5695	44.8379	9.62	0.716114	1.47777	1.4206	1.07874	1.05213	0.891361
1600	Q3UVL4	Vacuolar protein sorting-associated protein 51 homolog OS=Mus musculus GN=Vps51 PE=1 SV=2 - [VPS51_MOUSE]	4	86.1333	44.2148	5.5	0.929245	0.935753	0.79049	0.914954	1.03895	0.939783
1601	Q9JKN6	RNA-binding protein Nova-1 OS=Mus musculus GN=Nova1 PE=1 SV=2 - [NOVA1_MOUSE]	4	51.724	43.9387	9.86	1.0625	0.944597	0.913567	0.951663	0.908919	0.98834
1602	Q9CY64	Biliverdin reductase A OS=Mus musculus GN=Blvra PE=1 SV=1 - [BIEA_MOUSE]	4	33.5035	43.657	16.27	1.05979	1.0006	0.890261	1.04457	0.906735	0.927874
1603	Q62448	Eukaryotic translation initiation factor 4 gamma 2 OS=Mus musculus GN=Eif4g2 PE=1 SV=2 - [IF4G2_MOUSE]	4	102.041	42.67	3.75	1.0162	1.03092	1.02683	0.978873	0.968952	0.977605
1604	Q9CQR6	Serine/threonine-protein phosphatase 6 catalytic subunit OS=Mus musculus GN=Ppp6c PE=1 SV=1 - [PPP6_MOUSE]	4	35.1365	42.6401	16.07	0.889857	0.951916	0.908799	1.01598	0.961903	1.03584
1605	Q60771	Claudin-11 OS=Mus musculus GN=Cldn11 PE=1 SV=1 - [CLD11_MOUSE]	4	22.0993	42.5556	14.98	0.826695	1.22752	1.34019	0.692518	1.31748	1.37119
1606	Q6PDI5	Proteasome-associated protein ECM29 homolog OS=Mus musculus GN=Ecm29 PE=1 SV=3 - [ECM29_MOUSE]	4	203.573	42.34	2.66	0.995353	1.13649	0.963301	1.13869	1.04279	0.856824
1607	O54962	Barrier-to-autointegration factor OS=Mus musculus GN=Banf1 PE=1 SV=1 - [BAF_MOUSE]	4	10.096	42.28	32.58	0.961697	1.04552	1.1522	0.937302	1.06752	1.07318
1608	Q9WTM5	RuvB-like 2 OS=Mus musculus GN=Ruvbl2 PE=1 SV=3 - [RUVB2_MOUSE]	4	51.0805	42.022	9.07	1.05885	1.0341	1.02935	0.97223	0.941859	1.00889
1609	E9Q8I9	Protein furry homolog OS=Mus musculus GN=Fry PE=1 SV=1 - [FRY_MOUSE]	4	338.877	41.7215	1.39	0.931998	0.978079	1.11176	1.01325	1.05018	0.946577
1610	Q3UQ44	Ras GTPase-activating-like protein IQGAP2 OS=Mus musculus GN=Iqgap2 PE=1 SV=2 - [IQGA2_MOUSE]	4	180.416	41.7072	2.48	1.14929	1.0116	1.03227	1.09241	0.972257	0.954052
1611	Q8VDP4	Cell cycle and apoptosis regulator protein 2 OS=Mus musculus GN=Ccar2 PE=1 SV=2 - [CCAR2_MOUSE]	4	102.938	41.54	5.1	0.823286	1.14331	1.18837	0.998653	0.880183	0.966482
1612	Q91YJ2	Sorting nexin-4 OS=Mus musculus GN=Snx4 PE=1 SV=1 - [SNX4_MOUSE]	4	51.7451	41.1146	8.22	1.00895	0.995204	1.00627	0.905243	1.00142	0.95489
1613	Q9D1X0	Nucleolar protein 3 OS=Mus musculus GN=Nol3 PE=1 SV=1 - [NOL3_MOUSE]	4	24.5524	40.5441	17.27	1.06528	0.940647	0.831484	1.03433	0.969307	0.946756
1614	P20065	Thymosin beta-4 OS=Mus musculus GN=Tmsb4x PE=1 SV=1 - [TYB4_MOUSE]	4	5.67586	39.2549	50	1.15069	1.21863	1.03958	1.06069	1.05754	1.24351
1615	P11352	Glutathione peroxidase 1 OS=Mus musculus GN=Gpx1 PE=1 SV=2 - [GPX1_MOUSE]	4	22.3162	39.0521	22.39	0.96779	0.902925	0.853214	0.909222	0.995718	1.04281
1616	Q8JZK9	Hydroxymethylglutaryl-CoA synthase, cytoplasmic OS=Mus musculus GN=Hmgcs1 PE=1 SV=1 - [HMCS1_MOUSE]	4	57.5325	38.8229	9.62	1.09187	0.949983	0.899144	1.00427	1.07494	1.01891
1617	Q5F2E8	Serine/threonine-protein kinase TAO1 OS=Mus musculus GN=Taok1 PE=1 SV=1 - [TAOK1_MOUSE]	4	115.977	38.78	4.6	0.939522	0.96669	1.07804	0.950421	1.089	1.03442
1618	P29595	NEDD8 OS=Mus musculus GN=Nedd8 PE=1 SV=2 - [NEDD8_MOUSE]	4	8.96687	38.4197	43.21	1.00118	0.961334	1.05004	1.09707	0.995837	1.04427
1619	Q8C0T5	Signal-induced proliferation-associated 1-like protein 1 OS=Mus musculus GN=Sipa1l1 PE=1 SV=2 - [SI1L1_MOUSE]	4	196.909	38.3596	2.81	1.05395	0.981728	0.966654	0.991876	1.1225	1.03326
1620	Q9R118	Serine protease HTRA1 OS=Mus musculus GN=Htra1 PE=1 SV=2 - [HTRA1_MOUSE]	4	51.1816	38.3161	7.71	1.44606	1.0526	1.10364	0.989778	1.10389	1.05242
1621	P27612	Phospholipase A-2-activating protein OS=Mus musculus GN=Plaa PE=1 SV=4 - [PLAP_MOUSE]	4	87.1656	37.7127	8.19	1.00881	0.995797	0.888314	1.02539	1.04851	0.943931
1622	P70362	Ubiquitin recognition factor in ER-associated degradation protein 1 OS=Mus musculus GN=Ufd1 PE=1 SV=2 - [UFD1_MOUSE]	4	34.4593	37.43	14.01	1.06984	0.910335	0.925203	0.959837	1.01279	1.04833
1623	Q9QWY8	Arf-GAP with SH3 domain, ANK repeat and PH domain-containing protein 1 OS=Mus musculus GN=Asap1 PE=1 SV=2 - [ASAP1_MOUSE]	4	127.342	36.6137	3.57	1.058	0.957334	0.956024	0.953839	0.769925	1.06935
1624	Q9EPK7	Exportin-7 OS=Mus musculus GN=Xpo7 PE=1 SV=3 - [XPO7_MOUSE]	4	123.731	35.7285	4.32	1.13377	0.847727	0.916037	0.918061	1.07629	0.983102
1625	Q64737	Trifunctional purine biosynthetic protein adenosine-3 OS=Mus musculus GN=Gart PE=1 SV=3 - [PUR2_MOUSE]	4	107.436	35.66	4.55	0.982302	1.1928	1.12817	0.983808	0.995279	1.02716
1626	P56382	ATP synthase subunit epsilon, mitochondrial OS=Mus musculus GN=Atp5e PE=1 SV=2 - [ATP5E_MOUSE]	4	5.83415	35.1103	57.69	0.956664	0.992123	1.20367	0.979746	0.980355	1.08857
1627	Q8QZY1	Eukaryotic translation initiation factor 3 subunit L OS=Mus musculus GN=Eif3l PE=1 SV=1 - [EIF3L_MOUSE]	4	66.5703	34.8924	7.09	1.024	1.05727	1.09922	0.99414	0.962112	0.93601
1628	Q9DB60	Prostamide/prostaglandin F synthase OS=Mus musculus GN=Fam213b PE=1 SV=1 - [PGFS_MOUSE]	4	21.6563	34.89	22.89	1.09947	0.695017	0.915999	0.871635	1.08858	0.959025
1629	P35288	Ras-related protein Rab-23 OS=Mus musculus GN=Rab23 PE=1 SV=2 - [RAB23_MOUSE]	4	26.6616	34.5601	21.94	1.00873	0.992272	0.995953	1.01607	0.945548	0.939283
1630	Q8JZQ9	Eukaryotic translation initiation factor 3 subunit B OS=Mus musculus GN=Eif3b PE=1 SV=1 - [EIF3B_MOUSE]	4	91.3131	34.4847	4.73	1.03899	1.01095	0.98165	1.06648	1.00808	0.951074
1631	Q9D023	Mitochondrial pyruvate carrier 2 OS=Mus musculus GN=Mpc2 PE=1 SV=1 - [MPC2_MOUSE]	4	14.2766	33.9086	31.5	1.09459	0.804281	1.10271	1.03977	1.00636	0.956749
1632	P53702	Cytochrome c-type heme lyase OS=Mus musculus GN=Hccs PE=1 SV=2 - [CCHL_MOUSE]	4	30.9579	33.54	13.97	1.08526	0.959993	0.996143	1.03606	1.11142	1.04134
1633	Q99LB2	Dehydrogenase/reductase SDR family member 4 OS=Mus musculus GN=Dhrs4 PE=1 SV=3 - [DHRS4_MOUSE]	4	29.8657	33.28	15.41	1.02154	1.03986	0.985042	1.06404	0.984536	0.988487
1634	O70493	Sorting nexin-12 OS=Mus musculus GN=Snx12 PE=1 SV=1 - [SNX12_MOUSE]	4	19.1038	33.2284	25.45	1.14099	0.87367	0.896411	0.954283	0.989249	1.04372
1635	Q923D2	Flavin reductase (NADPH) OS=Mus musculus GN=Blvrb PE=1 SV=3 - [BLVRB_MOUSE]	4	22.1834	32.6375	20.39	1.11194	0.864905	0.938557	1.00557	1.13	1.00512
1636	Q3THS6	S-adenosylmethionine synthase isoform type-2 OS=Mus musculus GN=Mat2a PE=1 SV=2 - [METK2_MOUSE]	4	43.6614	32.2134	11.14	0.97086	0.999947	1.0143	1.0357	1.21687	0.993071
1637	Q9D2N4	Dystrobrevin alpha OS=Mus musculus GN=Dtna PE=1 SV=2 - [DTNA_MOUSE]	4	84.0141	31.9436	5.23	1.00493	0.877689	0.943853	0.932814	1.07348	0.910244
1638	Q9D061	Acyl-CoA-binding domain-containing protein 6 OS=Mus musculus GN=Acbd6 PE=1 SV=2 - [ACBD6_MOUSE]	4	30.8681	31.8557	13.83	1.00297	0.933683	1.02417	1.00701	0.995538	0.99683
1639	Q62376	U1 small nuclear ribonucleoprotein 70 kDa OS=Mus musculus GN=Snrnp70 PE=1 SV=2 - [RU17_MOUSE]	4	51.9609	31.7963	7.81	0.962598	0.871807	0.912909	0.941773	1.02946	1.00493
1640	Q6PAJ1	Breakpoint cluster region protein OS=Mus musculus GN=Bcr PE=1 SV=3 - [BCR_MOUSE]	4	142.982	31.6805	4.72	0.931164	0.997861	0.902422	0.950027	1.12014	0.965624
1641	A6H5Z3	Exocyst complex component 6B OS=Mus musculus GN=Exoc6b PE=1 SV=1 - [EXC6B_MOUSE]	4	94.0701	31.4973	5.8	0.90427	1.00869	1.08808	1.01762	1.03297	0.905013
1642	Q6P5F9	Exportin-1 OS=Mus musculus GN=Xpo1 PE=1 SV=1 - [XPO1_MOUSE]	4	123.013	31.4812	4.95	1.06059	1.06605	0.991837	1.07856	0.919598	0.968392
1643	Q8VD33	Small glutamine-rich tetratricopeptide repeat-containing protein beta OS=Mus musculus GN=Sgtb PE=1 SV=1 - [SGTB_MOUSE]	4	33.4082	31.1856	13.49	1.01611	0.882157	0.87327	0.950798	1.00883	1.05835
1644	Q8K394	Inactive phospholipase C-like protein 2 OS=Mus musculus GN=Plcl2 PE=1 SV=2 - [PLCL2_MOUSE]	4	125.692	31.1832	2.93	0.940401	0.988668	1.14251	0.886816	0.875992	0.951749
1645	Q8BIW1	Exopolyphosphatase PRUNE1 OS=Mus musculus GN=Prune1 PE=1 SV=1 - [PRUN1_MOUSE]	4	50.2075	30.6792	10.13	0.925672	1.10023	1.02505	1.01797	0.949432	0.957176
1646	O70166	Stathmin-3 OS=Mus musculus GN=Stmn3 PE=1 SV=1 - [STMN3_MOUSE]	4	20.9408	30.5686	24.44	0.968039	1.01635	0.870632	1.04069	0.853734	0.857363
1647	O54916	RalBP1-associated Eps domain-containing protein 1 OS=Mus musculus GN=Reps1 PE=1 SV=2 - [REPS1_MOUSE]	4	86.4662	30.4448	6.29	0.905104	0.97208	1.06517	0.870891	1.09799	1.04506
1648	P59764	Dedicator of cytokinesis protein 4 OS=Mus musculus GN=Dock4 PE=1 SV=1 - [DOCK4_MOUSE]	4	226.406	30.164	1.97	0.95901	0.876741	0.986716	0.893248	1.10466	0.885849
1649	O08663	Methionine aminopeptidase 2 OS=Mus musculus GN=Metap2 PE=1 SV=1 - [MAP2_MOUSE]	4	52.8883	29.8572	10.46	0.958278	1.07523	0.995481	0.805302	1.30603	1.10904
1650	Q9ERI6	Retinol dehydrogenase 14 OS=Mus musculus GN=Rdh14 PE=1 SV=1 - [RDH14_MOUSE]	4	36.3429	29.66	14.37	1.00726	1.14418	0.92649	1.09036	1.0102	0.951682
1651	O55013	Trafficking protein particle complex subunit 3 OS=Mus musculus GN=Trappc3 PE=1 SV=1 - [TPPC3_MOUSE]	4	20.2892	29.6	22.22	0.927602	0.992922	1.03027	1.04384	0.936073	0.950655
1652	P57759	Endoplasmic reticulum resident protein 29 OS=Mus musculus GN=Erp29 PE=1 SV=2 - [ERP29_MOUSE]	4	28.8051	29.49	13.74	1.11189	0.862213	0.873773	1.03356	1.0185	0.962749
1653	Q9JKV1	Proteasomal ubiquitin receptor ADRM1 OS=Mus musculus GN=Adrm1 PE=1 SV=2 - [ADRM1_MOUSE]	4	42.0337	29.4886	11.79	1.08796	0.962117	1.09687	0.835016	1.06757	1.01168
1654	Q62446	Peptidyl-prolyl cis-trans isomerase FKBP3 OS=Mus musculus GN=Fkbp3 PE=1 SV=2 - [FKBP3_MOUSE]	4	25.1323	29.2245	17.41	0.99533	1.01158	1.01098	0.965053	0.939919	1.01427
1655	Q8VIM9	Immunity-related GTPase family Q protein OS=Mus musculus GN=Irgq PE=1 SV=1 - [IRGQ_MOUSE]	4	59.2868	28.69	7.72	0.966819	0.880372	0.99923	0.991465	1.04368	0.98728
1656	Q9D906	Ubiquitin-like modifier-activating enzyme ATG7 OS=Mus musculus GN=Atg7 PE=1 SV=1 - [ATG7_MOUSE]	4	77.47	28.64	7.02	0.962802	1.01126	0.921118	1.01788	1.05116	1.01199
1657	Q8R3S6	Exocyst complex component 1 OS=Mus musculus GN=Exoc1 PE=1 SV=4 - [EXOC1_MOUSE]	4	101.825	28.1728	4.14	1.03845	0.970709	1.08328	0.95064	1.02132	1.01197
1658	P60867	40S ribosomal protein S20 OS=Mus musculus GN=Rps20 PE=1 SV=1 - [RS20_MOUSE]	4	13.3643	28.1498	28.57	0.936123	1.02324	1.04405	1.07383	0.982553	1.03173
1659	Q69Z98	Serine/threonine-protein kinase BRSK2 OS=Mus musculus GN=Brsk2 PE=1 SV=2 - [BRSK2_MOUSE]	4	81.6821	28.0709	5.85	1.09744	0.869022	0.998149	0.937069	1.1483	1.06148
1660	Q7TN29	Stromal membrane-associated protein 2 OS=Mus musculus GN=Smap2 PE=1 SV=1 - [SMAP2_MOUSE]	4	46.5467	27.98	14.02	0.958172	1.02421	0.990419	0.982074	1.11524	1.11009
1661	P52825	Carnitine O-palmitoyltransferase 2, mitochondrial OS=Mus musculus GN=Cpt2 PE=1 SV=2 - [CPT2_MOUSE]	4	73.9336	26.99	6.99	0.999284	1.01124	1.00894	0.933291	1.07191	1.14536
1662	A2AN08	E3 ubiquitin-protein ligase UBR4 OS=Mus musculus GN=Ubr4 PE=1 SV=1 - [UBR4_MOUSE]	4	571.927	26.94	0.83	1.01777	0.907713	0.897232	0.943401	0.969171	1.08111
1663	Q9D0A3	Arpin OS=Mus musculus GN=Arpin PE=1 SV=1 - [ARPIN_MOUSE]	4	25.1775	26.92	17.7	1.00824	1.08199	1.10627	1.0211	1.01634	1.0588
1664	Q6PFD5	Disks large-associated protein 3 OS=Mus musculus GN=Dlgap3 PE=1 SV=1 - [DLGP3_MOUSE]	4	105.808	26.87	3.79	0.96905	0.947312	1.02976	0.986627	0.980737	0.98639
1665	Q921F4	Heterogeneous nuclear ribonucleoprotein L-like OS=Mus musculus GN=Hnrnpll PE=1 SV=3 - [HNRLL_MOUSE]	4	64.0843	26.02	8.29	1.07993	1.02479	1.10413	0.924772	1.00538	1.00799
1666	O70325	Phospholipid hydroperoxide glutathione peroxidase, mitochondrial OS=Mus musculus GN=Gpx4 PE=1 SV=4 - [GPX41_MOUSE]	4	22.2149	25.3523	21.32	0.957078	1.02406	1.0697	1.00451	1.0875	1.01608
1667	Q99LB6	Methionine adenosyltransferase 2 subunit beta OS=Mus musculus GN=Mat2b PE=1 SV=1 - [MAT2B_MOUSE]	4	37.369	24.67	9.88	1.03241	1.00698	0.961063	1.00748	1.12617	1.08262
1668	Q9QZ08	N-acetyl-D-glucosamine kinase OS=Mus musculus GN=Nagk PE=1 SV=3 - [NAGK_MOUSE]	4	37.2448	24.2089	11.37	1.03726	0.951832	0.940834	0.945063	1.12926	1.00369
1669	Q9QYJ0	DnaJ homolog subfamily A member 2 OS=Mus musculus GN=Dnaja2 PE=1 SV=1 - [DNJA2_MOUSE]	4	45.7166	23.81	9.47	0.94185	1.07827	1.05837	1.10116	1.00264	1.02912
1670	Q5DTT2	PH and SEC7 domain-containing protein 1 OS=Mus musculus GN=Psd PE=1 SV=2 - [PSD1_MOUSE]	4	109.619	23.69	3.71	0.989572	0.977349	1.02411	0.996738	0.917406	1.01554
1671	P51855	Glutathione synthetase OS=Mus musculus GN=Gss PE=1 SV=1 - [GSHB_MOUSE]	4	52.214	23.07	7.81	1.04471	0.950634	0.910392	1.00633	1.03649	1.01885
1672	Q791T5	Mitochondrial carrier homolog 1 OS=Mus musculus GN=Mtch1 PE=1 SV=1 - [MTCH1_MOUSE]	4	41.5383	22.4424	10.28	0.952878	1.04618	1.07099	1.04483	0.957915	0.9835
1673	Q9D8B7	Junctional adhesion molecule C OS=Mus musculus GN=Jam3 PE=1 SV=2 - [JAM3_MOUSE]	4	34.8155	21.73	10.97	0.944157	1.03077	1.05965	0.848627	1.15791	1.1528
1674	Q9QYI3	DnaJ homolog subfamily C member 7 OS=Mus musculus GN=Dnajc7 PE=1 SV=2 - [DNJC7_MOUSE]	4	56.4396	20.67	8.1	0.986751	0.958469	0.98385	0.962525	0.875589	0.9416
1675	A2A5R2	Brefeldin A-inhibited guanine nucleotide-exchange protein 2 OS=Mus musculus GN=Arfgef2 PE=1 SV=1 - [BIG2_MOUSE]	4	202.11	19.04	2.9	1.13574	0.967193	0.989603	0.973121	0.837471	1.01152
1676	O88487	Cytoplasmic dynein 1 intermediate chain 2 OS=Mus musculus GN=Dync1i2 PE=1 SV=1 - [DC1I2_MOUSE]	4	68.3517	0	7.52	1.05749	0.981646	0.981766	0.953768	1.1198	1.01773
1677	Q3TZZ7	Extended synaptotagmin-2 OS=Mus musculus GN=Esyt2 PE=1 SV=1 - [ESYT2_MOUSE]	4	94.0806	0	6.27	0.976519	0.864288	0.872883	0.964118	1.21348	1.00984
1678	Q8CIG8	Protein arginine N-methyltransferase 5 OS=Mus musculus GN=Prmt5 PE=1 SV=3 - [ANM5_MOUSE]	4	72.6336	0	6.28	1.00954	0.850188	0.854984	0.982789	0.964854	0.833867
1679	Q8CGP0	Histone H2B type 3-B OS=Mus musculus GN=Hist3h2bb PE=1 SV=3 - [H2B3B_MOUSE]	3	13.8995	1512.67	62.7	1.00374	1.01955	1.03637	0.846198	0.922885	1.10298
1680	P26883	Peptidyl-prolyl cis-trans isomerase FKBP1A OS=Mus musculus GN=Fkbp1a PE=1 SV=2 - [FKB1A_MOUSE]	3	11.9151	715.245	40.74	1.0719	0.897501	0.938233	1.0152	1.05899	1.04849
1681	P70333	Heterogeneous nuclear ribonucleoprotein H2 OS=Mus musculus GN=Hnrnph2 PE=1 SV=1 - [HNRH2_MOUSE]	3	49.2483	449.156	29.18	0.937211	1.10292	1.23461	0.870391	1.0051	1.11187
1682	P10630	Eukaryotic initiation factor 4A-II OS=Mus musculus GN=Eif4a2 PE=1 SV=2 - [IF4A2_MOUSE]	3	46.3728	443.641	30.96	1.15857	0.965103	0.987989	0.950512	1.05288	1.07737
1683	P63087	Serine/threonine-protein phosphatase PP1-gamma catalytic subunit OS=Mus musculus GN=Ppp1cc PE=1 SV=1 - [PP1G_MOUSE]	3	36.9597	359.782	43.96	1.05255	1.02311	0.981734	1.05711	1.03719	0.976752
1684	P62748	Hippocalcin-like protein 1 OS=Mus musculus GN=Hpcal1 PE=1 SV=2 - [HPCL1_MOUSE]	3	22.324	339.504	52.85	0.995946	0.931266	0.816974	0.930235	0.926166	0.919826
1685	Q9CQD1	Ras-related protein Rab-5A OS=Mus musculus GN=Rab5a PE=1 SV=1 - [RAB5A_MOUSE]	3	23.5838	330.015	42.33	1.11602	0.909288	0.938051	0.930819	1.18044	0.997483
1686	P62137	Serine/threonine-protein phosphatase PP1-alpha catalytic subunit OS=Mus musculus GN=Ppp1ca PE=1 SV=1 - [PP1A_MOUSE]	3	37.5158	326.707	41.52	0.91033	0.906599	0.962987	1.09188	0.956725	0.929267
1687	P26231	Catenin alpha-1 OS=Mus musculus GN=Ctnna1 PE=1 SV=1 - [CTNA1_MOUSE]	3	100.044	316.605	13.47	1.15047	0.897164	0.872097	0.964891	0.979404	0.973974
1688	Q9D0M5	Dynein light chain 2, cytoplasmic OS=Mus musculus GN=Dynll2 PE=1 SV=1 - [DYL2_MOUSE]	3	10.3431	291.041	56.18	1.0224	1.15154	1.18109	0.901154	0.850667	1.15375
1689	P99027	60S acidic ribosomal protein P2 OS=Mus musculus GN=Rplp2 PE=1 SV=3 - [RLA2_MOUSE]	3	11.6438	281.731	40.87	1.00116	0.989182	0.93228	0.973115	1.06582	1.07022
1690	Q91X97	Neurocalcin-delta OS=Mus musculus GN=Ncald PE=1 SV=4 - [NCALD_MOUSE]	3	22.2309	279.415	36.27	1.07161	0.987894	0.946762	0.899873	0.903281	0.925384
1691	Q9D2M8	Ubiquitin-conjugating enzyme E2 variant 2 OS=Mus musculus GN=Ube2v2 PE=1 SV=4 - [UB2V2_MOUSE]	3	16.3562	278.87	40	1.19881	0.850795	0.846334	0.951971	1.00097	0.983341
1692	Q61411	GTPase HRas OS=Mus musculus GN=Hras PE=1 SV=2 - [RASH_MOUSE]	3	21.2846	271.883	34.39	0.904549	1.05701	1.09128	0.937237	1.02879	0.981222
1693	Q61206	Platelet-activating factor acetylhydrolase IB subunit beta OS=Mus musculus GN=Pafah1b2 PE=1 SV=2 - [PA1B2_MOUSE]	3	25.5652	268.303	14.85	1.04177	0.948397	0.912345	1.07542	1.06708	1.00374
1694	P84084	ADP-ribosylation factor 5 OS=Mus musculus GN=Arf5 PE=1 SV=2 - [ARF5_MOUSE]	3	20.5166	257.152	40	1.03827	1.06813	0.976584	1.11873	0.874808	1.15836
1695	O55100	Synaptogyrin-1 OS=Mus musculus GN=Syngr1 PE=1 SV=2 - [SNG1_MOUSE]	3	25.6363	239.779	14.53	0.929611	1.05229	1.13686	1.08576	0.940744	0.893093
1696	P56371	Ras-related protein Rab-4A OS=Mus musculus GN=Rab4a PE=1 SV=2 - [RAB4A_MOUSE]	3	24.3932	228.082	28.9	1.05461	0.895958	0.919225	1.06537	0.896463	1.03098
1697	P07759	Serine protease inhibitor A3K OS=Mus musculus GN=Serpina3k PE=1 SV=2 - [SPA3K_MOUSE]	3	46.85	204.028	11.24	0.951039	0.851044	0.871771	1.10093	1.09571	0.950716
1698	P63040	Complexin-1 OS=Mus musculus GN=Cplx1 PE=1 SV=1 - [CPLX1_MOUSE]	3	15.1125	199.094	55.97	0.957748	1.08612	1.16809	1.06626	1.05745	1.09109
1699	Q9CPQ3	Mitochondrial import receptor subunit TOM22 homolog OS=Mus musculus GN=Tomm22 PE=1 SV=3 - [TOM22_MOUSE]	3	15.5268	172.099	30.99	0.874269	1.04794	1.05961	0.955487	0.956932	0.941423
1700	Q8R5J9	PRA1 family protein 3 OS=Mus musculus GN=Arl6ip5 PE=1 SV=2 - [PRAF3_MOUSE]	3	21.5433	162.044	14.36	1.00153	1.09297	1.12468	0.973761	0.939122	1.02926
1701	P26043	Radixin OS=Mus musculus GN=Rdx PE=1 SV=3 - [RADI_MOUSE]	3	68.5003	161.518	15.09	0.987822	1.09042	1.06135	1.06897	1.07656	1.07099
1702	P35980	60S ribosomal protein L18 OS=Mus musculus GN=Rpl18 PE=1 SV=3 - [RL18_MOUSE]	3	21.6312	156.927	19.68	1.07512	0.989394	1.02709	1.02651	0.988175	0.948407
1703	P63080	Gamma-aminobutyric acid receptor subunit beta-3 OS=Mus musculus GN=Gabrb3 PE=2 SV=1 - [GBRB3_MOUSE]	3	54.1308	154.273	13.74	0.885247	1.04852	0.99178	1.17772	0.967132	0.922575
1704	Q61016	Guanine nucleotide-binding protein G(I)/G(S)/G(O) subunit gamma-7 OS=Mus musculus GN=Gng7 PE=1 SV=2 - [GBG7_MOUSE]	3	7.47491	140.274	47.06	0.957829	0.909072	0.964541	0.928483	1.09317	0.959194
1705	Q9QZX7	Serine racemase OS=Mus musculus GN=Srr PE=1 SV=1 - [SRR_MOUSE]	3	36.336	136.436	13.57	0.965563	1.07	0.885508	1.20612	0.980448	0.8231
1706	Q99L43	Phosphatidate cytidylyltransferase 2 OS=Mus musculus GN=Cds2 PE=1 SV=1 - [CDS2_MOUSE]	3	51.28	134.038	10.36	0.863529	1.12383	1.02731	1.00023	0.945047	0.938554
1707	P85094	Isochorismatase domain-containing protein 2A OS=Mus musculus GN=Isoc2a PE=1 SV=1 - [ISC2A_MOUSE]	3	22.403	128.655	21.84	1.0412	0.990711	0.880544	1.00636	0.951542	1.07495
1708	O35295	Transcriptional activator protein Pur-beta OS=Mus musculus GN=Purb PE=1 SV=3 - [PURB_MOUSE]	3	33.8808	128.421	12.96	0.96193	1.01923	1.04358	0.96888	1.0557	1.08503
1709	Q9CR26	Vacuolar protein sorting-associated protein VTA1 homolog OS=Mus musculus GN=Vta1 PE=1 SV=1 - [VTA1_MOUSE]	3	33.8919	120.659	14.24	0.967453	0.860427	0.908481	0.936875	1.07144	1.09363
1710	Q8CH72	E3 ubiquitin-protein ligase TRIM32 OS=Mus musculus GN=Trim32 PE=1 SV=2 - [TRI32_MOUSE]	3	72.0113	119.558	6.11	1.07597	0.876065	0.960192	1.19419	1.024	0.892279
1711	O88958	Glucosamine-6-phosphate isomerase 1 OS=Mus musculus GN=Gnpda1 PE=1 SV=3 - [GNPI1_MOUSE]	3	32.5285	113.991	14.19	1.04591	0.993095	1.00115	1.12006	1.00291	0.990267
1712	P61971	Nuclear transport factor 2 OS=Mus musculus GN=Nutf2 PE=1 SV=1 - [NTF2_MOUSE]	3	14.469	113.677	22.05	1.09407	0.995441	0.987979	0.977177	0.96739	1.03481
1713	O70591	Prefoldin subunit 2 OS=Mus musculus GN=Pfdn2 PE=1 SV=2 - [PFD2_MOUSE]	3	16.5236	113.294	19.48	1.09005	1.01521	0.919132	1.02776	0.961984	1.02958
1714	P83510	Traf2 and NCK-interacting protein kinase OS=Mus musculus GN=Tnik PE=1 SV=2 - [TNIK_MOUSE]	3	150.274	113.187	4.61	1.00839	0.874052	0.908618	0.976485	1.0915	0.937232
1715	P67984	60S ribosomal protein L22 OS=Mus musculus GN=Rpl22 PE=1 SV=2 - [RL22_MOUSE]	3	14.7498	108.39	23.44	1.03783	0.904348	1.05743	0.968553	0.983903	0.987129
1716	Q9JKB1	Ubiquitin carboxyl-terminal hydrolase isozyme L3 OS=Mus musculus GN=Uchl3 PE=1 SV=2 - [UCHL3_MOUSE]	3	26.135	108.272	14.78	1.03455	0.831609	0.81764	1.04355	1.10347	0.955182
1717	Q9CRB8	Mitochondrial fission process protein 1 OS=Mus musculus GN=Mtfp1 PE=1 SV=1 - [MTFP1_MOUSE]	3	18.3026	107.273	21.08	0.95795	1.02283	1.07951	1.00514	1.04342	0.955752
1718	Q03958	Prefoldin subunit 6 OS=Mus musculus GN=Pfdn6 PE=1 SV=1 - [PFD6_MOUSE]	3	14.4457	106.583	20.47	1.02358	0.922264	0.875061	0.994605	1.03516	1.05604
1719	Q9WTX6	Cullin-1 OS=Mus musculus GN=Cul1 PE=1 SV=1 - [CUL1_MOUSE]	3	89.635	106.14	4.38	0.991028	0.94931	1.00153	0.969414	1.02428	1.02071
1720	Q9Z0V2	Potassium voltage-gated channel subfamily D member 2 OS=Mus musculus GN=Kcnd2 PE=1 SV=1 - [KCND2_MOUSE]	3	70.5315	105.846	4.92	0.838466	0.840007	0.852678	1.12528	0.901186	0.933039
1721	O08547	Vesicle-trafficking protein SEC22b OS=Mus musculus GN=Sec22b PE=1 SV=3 - [SC22B_MOUSE]	3	24.7248	103.229	14.42	0.978284	0.992691	1.03265	1.00047	0.919223	1.02872
1722	P50153	Guanine nucleotide-binding protein G(I)/G(S)/G(O) subunit gamma-4 OS=Mus musculus GN=Gng4 PE=1 SV=1 - [GBG4_MOUSE]	3	8.39918	102.104	53.33	0.930112	1.01657	0.875806	0.815617	0.885593	1.03649
1723	Q78IK4	MICOS complex subunit Mic27 OS=Mus musculus GN=Apool PE=1 SV=1 - [MIC27_MOUSE]	3	29.2422	101.797	17.36	0.977489	0.944155	0.980934	0.946111	0.961841	1.03597
1724	Q62093	Serine/arginine-rich splicing factor 2 OS=Mus musculus GN=Srsf2 PE=1 SV=4 - [SRSF2_MOUSE]	3	25.4612	99.9466	18.55	0.880531	1.10146	1.10041	0.989349	0.96647	1.02005
1725	P43276	Histone H1.5 OS=Mus musculus GN=Hist1h1b PE=1 SV=2 - [H15_MOUSE]	3	22.5624	97.8421	27.8	1.02425	1.05855	1.14829	0.869959	1.19046	1.17449
1726	Q69ZK9	Neuroligin-2 OS=Mus musculus GN=Nlgn2 PE=1 SV=2 - [NLGN2_MOUSE]	3	90.932	97.4577	9.21	1.00355	1.03053	1.01043	1.05444	0.976717	0.920564
1727	Q99KF1	Transmembrane emp24 domain-containing protein 9 OS=Mus musculus GN=Tmed9 PE=1 SV=2 - [TMED9_MOUSE]	3	27.1101	97.066	14.47	1.08101	0.893216	0.983303	0.929409	0.991764	1.0891
1728	O88951	Protein lin-7 homolog B OS=Mus musculus GN=Lin7b PE=1 SV=2 - [LIN7B_MOUSE]	3	22.9	96.7405	28.99	0.982775	0.943388	1.00411	0.956135	0.967739	0.927828
1729	P61957	Small ubiquitin-related modifier 2 OS=Mus musculus GN=Sumo2 PE=1 SV=1 - [SUMO2_MOUSE]	3	10.8644	96.3094	29.47	1.05221	1.03007	1.06432	1.17751	0.95583	1.01572
1730	Q8VEH3	ADP-ribosylation factor-like protein 8A OS=Mus musculus GN=Arl8a PE=1 SV=1 - [ARL8A_MOUSE]	3	21.376	96.1964	31.18	1.06476	1.07781	0.992819	1.06074	0.901411	0.864522
1731	P63216	Guanine nucleotide-binding protein G(I)/G(S)/G(O) subunit gamma-3 OS=Mus musculus GN=Gng3 PE=1 SV=1 - [GBG3_MOUSE]	3	8.29916	94.4816	32	0.912176	1.33086	1.38623	0.914427	0.823269	1.07039
1732	P26645	Myristoylated alanine-rich C-kinase substrate OS=Mus musculus GN=Marcks PE=1 SV=2 - [MARCS_MOUSE]	3	29.6438	93.7469	13.27	1.11621	0.975678	0.874067	0.907833	0.868515	1.019
1733	Q9CQW2	ADP-ribosylation factor-like protein 8B OS=Mus musculus GN=Arl8b PE=1 SV=1 - [ARL8B_MOUSE]	3	21.5251	93.7033	28.49	1.24184	1.28297	0.965276	1.10883	0.895312	0.983296
1734	Q8R1I1	Cytochrome b-c1 complex subunit 9 OS=Mus musculus GN=Uqcr10 PE=1 SV=1 - [QCR9_MOUSE]	3	7.44087	93.3235	48.44	0.956059	1.07679	1.18589	1.11865	0.937923	0.979027
1735	Q8K400	Syntaxin-binding protein 5 OS=Mus musculus GN=Stxbp5 PE=1 SV=3 - [STXB5_MOUSE]	3	127.57	91.5579	4.08	0.941632	0.94888	1.06387	0.923998	1.05963	0.974932
1736	Q9CZR8	Elongation factor Ts, mitochondrial OS=Mus musculus GN=Tsfm PE=1 SV=1 - [EFTS_MOUSE]	3	35.3121	90.9436	15.12	1.03229	0.949959	0.967157	0.983356	0.927306	0.961377
1737	Q9D0M1	Phosphoribosyl pyrophosphate synthase-associated protein 1 OS=Mus musculus GN=Prpsap1 PE=1 SV=1 - [KPRA_MOUSE]	3	39.4067	90.5687	16.85	1.10547	0.880453	0.981145	0.909102	1.06685	0.906092
1738	Q61387	Cytochrome c oxidase subunit 7A-related protein, mitochondrial OS=Mus musculus GN=Cox7a2l PE=1 SV=1 - [COX7R_MOUSE]	3	12.3914	90.4443	26.13	1.33629	0.811112	0.786344	1.01202	0.611801	0.859767
1739	P39688	Tyrosine-protein kinase Fyn OS=Mus musculus GN=Fyn PE=1 SV=4 - [FYN_MOUSE]	3	60.6363	90.3954	10.61	1.07171	0.892568	0.959158	0.980856	0.975112	1.00658
1740	Q8VDP6	CDP-diacylglycerol--inositol 3-phosphatidyltransferase OS=Mus musculus GN=Cdipt PE=1 SV=1 - [CDIPT_MOUSE]	3	23.5832	88.7961	15.96	0.932106	1.114	1.10665	1.03181	0.962397	0.915477
1741	Q9DCS3	Enoyl-[acyl-carrier-protein] reductase, mitochondrial OS=Mus musculus GN=Mecr PE=1 SV=2 - [MECR_MOUSE]	3	40.3173	88.5136	12.33	1.03176	0.978999	0.906328	0.938783	1.00205	1.01995
1742	Q9WTP6	Adenylate kinase 2, mitochondrial OS=Mus musculus GN=Ak2 PE=1 SV=5 - [KAD2_MOUSE]	3	26.4517	87.1022	16.32	0.848088	1.11314	1.20209	1.00349	1.01461	1.00535
1743	P62331	ADP-ribosylation factor 6 OS=Mus musculus GN=Arf6 PE=1 SV=2 - [ARF6_MOUSE]	3	20.0694	85.1925	25.14	0.897422	1.10202	1.09608	0.970155	0.976009	0.942743
1744	Q9CPX6	Ubiquitin-like-conjugating enzyme ATG3 OS=Mus musculus GN=Atg3 PE=1 SV=1 - [ATG3_MOUSE]	3	35.7734	85.0131	12.1	0.976039	1.03786	0.976332	1.04035	0.930255	1.0342
1745	P46935	E3 ubiquitin-protein ligase NEDD4 OS=Mus musculus GN=Nedd4 PE=1 SV=3 - [NEDD4_MOUSE]	3	102.642	83.985	6.76	1.02742	1.01581	1.06398	0.970227	1.00602	0.988524
1746	O54946	DnaJ homolog subfamily B member 6 OS=Mus musculus GN=Dnajb6 PE=1 SV=4 - [DNJB6_MOUSE]	3	39.7829	83.8443	11.23	0.938138	1.04677	1.07925	0.942234	1.04077	0.945644
1747	Q5SXY1	Cytospin-B OS=Mus musculus GN=Specc1 PE=1 SV=2 - [CYTSB_MOUSE]	3	118.029	82.9705	4.22	0.851991	0.956202	0.901316	1.05183	0.984012	0.974486
1748	P35436	Glutamate receptor ionotropic, NMDA 2A OS=Mus musculus GN=Grin2a PE=1 SV=2 - [NMDE1_MOUSE]	3	165.316	80.0064	2.94	0.825107	1.19865	1.21417	1.03804	0.926034	0.928855
1749	Q9D1M0	Protein SEC13 homolog OS=Mus musculus GN=Sec13 PE=1 SV=3 - [SEC13_MOUSE]	3	35.5431	79.7573	15.84	0.958443	1.0086	0.869534	1.05841	1.06246	1.01733
1750	P61148	Fibroblast growth factor 1 OS=Mus musculus GN=Fgf1 PE=1 SV=1 - [FGF1_MOUSE]	3	17.4067	79.7485	21.29	1.31926	0.937498	0.819575	0.992865	0.907751	1.11224
1751	P02468	Laminin subunit gamma-1 OS=Mus musculus GN=Lamc1 PE=1 SV=2 - [LAMC1_MOUSE]	3	177.185	77.1798	2.68	0.887671	0.960236	1.05064	1.09826	0.815525	1.0857
1752	P84089	Enhancer of rudimentary homolog OS=Mus musculus GN=Erh PE=1 SV=1 - [ERH_MOUSE]	3	12.251	76.5949	37.5	1.08154	0.97859	0.990441	1.00859	0.978014	0.967231
1753	Q8BWY3	Eukaryotic peptide chain release factor subunit 1 OS=Mus musculus GN=Etf1 PE=1 SV=4 - [ERF1_MOUSE]	3	49.0002	76.5556	7.55	0.978775	1.02631	0.951569	1.05655	1.09313	1.01401
1754	Q6P1D5	Seizure 6-like protein OS=Mus musculus GN=Sez6l PE=1 SV=1 - [SE6L1_MOUSE]	3	104.76	75.8764	4.57	1.00913	0.93497	0.829074	0.953029	1.07737	0.933954
1755	P60840	Alpha-endosulfine OS=Mus musculus GN=Ensa PE=1 SV=1 - [ENSA_MOUSE]	3	13.3267	75.82	36.36	1.02654	0.93478	1.01524	0.957392	1.13311	1.11131
1756	Q8BGN8	Synaptoporin OS=Mus musculus GN=Synpr PE=1 SV=1 - [SYNPR_MOUSE]	3	29.2093	75.7057	14.34	0.954377	1.06599	1.16175	1.05105	0.926203	0.904385
1757	P56380	Bis(5'-nucleosyl)-tetraphosphatase [asymmetrical] OS=Mus musculus GN=Nudt2 PE=1 SV=3 - [AP4A_MOUSE]	3	16.9787	74.1438	25.17	0.900715	0.90934	0.973385	1.01582	1.05005	1.07055
1758	Q9DCH4	Eukaryotic translation initiation factor 3 subunit F OS=Mus musculus GN=Eif3f PE=1 SV=2 - [EIF3F_MOUSE]	3	37.9603	74.0708	11.36	1.08713	0.85252	0.880424	0.967662	0.943937	0.997737
1759	Q6PEB6	MOB-like protein phocein OS=Mus musculus GN=Mob4 PE=1 SV=1 - [PHOCN_MOUSE]	3	26.0156	72.8935	13.78	1.01957	1.04033	0.989297	0.938588	1.00267	1.04851
1760	A2ASQ1	Agrin OS=Mus musculus GN=Agrn PE=1 SV=1 - [AGRIN_MOUSE]	3	207.403	72.4929	1.74	0.922195	1.13129	0.985404	0.970836	0.848786	0.923472
1761	Q60900	ELAV-like protein 3 OS=Mus musculus GN=Elavl3 PE=1 SV=1 - [ELAV3_MOUSE]	3	39.5083	72.0655	19.89	0.981485	1.00201	1.02566	1.00666	0.935619	0.989467
1762	Q922Q4	Pyrroline-5-carboxylate reductase 2 OS=Mus musculus GN=Pycr2 PE=1 SV=1 - [P5CR2_MOUSE]	3	33.6376	71.6428	13.13	0.963563	1.04007	1.03272	1.09637	0.959376	0.964545
1763	Q9JKD3	Secretory carrier-associated membrane protein 5 OS=Mus musculus GN=Scamp5 PE=1 SV=1 - [SCAM5_MOUSE]	3	26.051	70.9945	11.91	0.95764	1.16086	1.24754	0.939354	0.888032	0.942937
1764	Q924L1	LETM1 domain-containing protein 1 OS=Mus musculus GN=Letmd1 PE=1 SV=1 - [LTMD1_MOUSE]	3	41.6742	70.6444	10.83	1.05298	0.892771	0.951761	0.928691	1.11406	0.979688
1765	Q8BWG8	Beta-arrestin-1 OS=Mus musculus GN=Arrb1 PE=1 SV=1 - [ARRB1_MOUSE]	3	46.9432	70.3763	6.7	1.13486	0.983568	0.889423	0.989628	0.9569	0.926913
1766	P61967	AP-1 complex subunit sigma-1A OS=Mus musculus GN=Ap1s1 PE=1 SV=1 - [AP1S1_MOUSE]	3	18.7206	69.6041	15.82	1.0154	1.06732	1.05302	1.02702	1.06999	0.956762
1767	Q8CHX7	Raftlin-2 OS=Mus musculus GN=Rftn2 PE=1 SV=3 - [RFTN2_MOUSE]	3	54.9372	68.8281	7.4	0.969208	1.11534	1.13455	1.17021	0.772724	0.937115
1768	Q6P4S6	Serine/threonine-protein kinase SIK3 OS=Mus musculus GN=Sik3 PE=1 SV=3 - [SIK3_MOUSE]	3	145.692	68.5275	3.05	0.872248	1.16346	0.985374	0.990048	0.927517	0.989047
1769	Q8C7K6	Prenylcysteine oxidase-like OS=Mus musculus GN=Pcyox1l PE=1 SV=1 - [PCYXL_MOUSE]	3	54.8402	68.3928	6.87	1.10681	0.887757	0.854395	0.967609	0.98894	0.925488
1770	P28352	DNA-(apurinic or apyrimidinic site) lyase OS=Mus musculus GN=Apex1 PE=1 SV=2 - [APEX1_MOUSE]	3	35.4681	68.1978	13.88	1.03039	1.08075	1.08803	0.982655	1.16614	1.15469
1771	Q9JKF6	Nectin-1 OS=Mus musculus GN=Nectin1 PE=1 SV=3 - [NECT1_MOUSE]	3	56.9994	68.1336	8.35	1.03337	1.01534	0.950069	1.00425	0.911129	0.944933
1772	Q61282	Aggrecan core protein OS=Mus musculus GN=Acan PE=1 SV=2 - [PGCA_MOUSE]	3	221.805	68.0544	2.16	1.02226	0.682947	0.818518	0.863117	1.88692	1.15176
1773	Q80TL7	Protein MON2 homolog OS=Mus musculus GN=Mon2 PE=1 SV=2 - [MON2_MOUSE]	3	188.958	67.8765	1.92	1.09961	1.14178	1.08323	1.03142	0.99921	1.11393
1774	O88448	Kinesin light chain 2 OS=Mus musculus GN=Klc2 PE=1 SV=1 - [KLC2_MOUSE]	3	66.6214	67.1773	12.85	1.01951	1.01599	1.03739	0.99819	0.982731	1.07206
1775	P07356	Annexin A2 OS=Mus musculus GN=Anxa2 PE=1 SV=2 - [ANXA2_MOUSE]	3	38.6518	65.9424	9.44	1.06963	0.845154	0.863701	0.968459	0.766125	1.02089
1776	Q99PL6	UBX domain-containing protein 6 OS=Mus musculus GN=Ubxn6 PE=1 SV=1 - [UBXN6_MOUSE]	3	49.7651	65.9155	9.5	1.0167	0.93268	0.961294	1.03795	0.876436	0.937737
1777	P51859	Hepatoma-derived growth factor OS=Mus musculus GN=Hdgf PE=1 SV=2 - [HDGF_MOUSE]	3	26.2526	65.3638	14.77	1.09616	1.05058	1.15677	1.02408	0.827411	1.00957
1778	Q9CY50	Translocon-associated protein subunit alpha OS=Mus musculus GN=Ssr1 PE=1 SV=1 - [SSRA_MOUSE]	3	32.0451	64.5627	11.89	0.851268	1.1459	1.03696	1.06591	0.86118	0.952227
1779	Q63739	Protein tyrosine phosphatase type IVA 1 OS=Mus musculus GN=Ptp4a1 PE=1 SV=1 - [TP4A1_MOUSE]	3	19.8022	63.5982	20.81	1.03248	1.04204	1.16947	0.923856	1.19701	1.07459
1780	Q8BK08	Transmembrane protein 11, mitochondrial OS=Mus musculus GN=Tmem11 PE=1 SV=1 - [TMM11_MOUSE]	3	21.2978	62.8283	17.37	1.0101	0.859322	0.915068	0.91393	1.07061	1.06301
1781	Q64674	Spermidine synthase OS=Mus musculus GN=Srm PE=1 SV=1 - [SPEE_MOUSE]	3	33.9728	62.6845	10.26	1.047	0.941205	0.864392	1.01839	0.981006	0.988308
1782	Q9DBL7	Bifunctional coenzyme A synthase OS=Mus musculus GN=Coasy PE=1 SV=2 - [COASY_MOUSE]	3	61.9846	62.5853	7.1	1.3725	1.07849	0.652368	1.54759	0.922932	1.01615
1783	Q8R3Q2	Serine/threonine-protein phosphatase 6 regulatory subunit 2 OS=Mus musculus GN=Ppp6r2 PE=1 SV=1 - [PP6R2_MOUSE]	3	100.397	62.3316	4.33	1.0435	0.873007	0.922735	0.93954	0.891957	0.990875
1784	P97823	Acyl-protein thioesterase 1 OS=Mus musculus GN=Lypla1 PE=1 SV=1 - [LYPA1_MOUSE]	3	24.6714	61.92	13.91	1.06133	0.933591	0.91923	0.959473	1.0732	1.09649
1785	P61087	Ubiquitin-conjugating enzyme E2 K OS=Mus musculus GN=Ube2k PE=1 SV=3 - [UBE2K_MOUSE]	3	22.3926	61.6725	19.5	0.951924	1.09271	1.02335	0.911876	0.954301	0.935399
1786	E9PV24	Fibrinogen alpha chain OS=Mus musculus GN=Fga PE=1 SV=1 - [FIBA_MOUSE]	3	87.3753	61.3201	4.56	0.883844	1.0406	1.06045	0.91557	1.06192	1.05523
1787	Q922B1	O-acetyl-ADP-ribose deacetylase MACROD1 OS=Mus musculus GN=Macrod1 PE=1 SV=2 - [MACD1_MOUSE]	3	35.2724	61.1432	10.22	1.11288	1.02314	1.0346	1.07078	1.02436	1.11733
1788	Q91Z61	GTP-binding protein Di-Ras1 OS=Mus musculus GN=Diras1 PE=1 SV=1 - [DIRA1_MOUSE]	3	22.2505	61.0238	23.23	1.16498	0.971236	0.915307	0.964466	1.06565	1.06767
1789	Q8VHI6	Wiskott-Aldrich syndrome protein family member 3 OS=Mus musculus GN=Wasf3 PE=1 SV=1 - [WASF3_MOUSE]	3	55.1696	60.9076	9.18	1.06022	0.935524	1.01113	0.895472	1.05346	1.01354
1790	Q9CR00	26S proteasome non-ATPase regulatory subunit 9 OS=Mus musculus GN=Psmd9 PE=1 SV=1 - [PSMD9_MOUSE]	3	24.7046	60.4737	15.77	0.913993	0.986455	0.929614	0.868378	1.02345	0.971214
1791	Q8VH51	RNA-binding protein 39 OS=Mus musculus GN=Rbm39 PE=1 SV=2 - [RBM39_MOUSE]	3	59.3697	60.2398	8.11	0.917359	1.11131	1.02036	1.02156	0.951374	0.926171
1792	Q80TM9	Nischarin OS=Mus musculus GN=Nisch PE=1 SV=2 - [NISCH_MOUSE]	3	174.903	60.11	2.32	0.958633	1.0062	0.848769	0.990059	1.05964	1.00535
1793	P97494	Glutamate--cysteine ligase catalytic subunit OS=Mus musculus GN=Gclc PE=1 SV=4 - [GSH1_MOUSE]	3	72.5251	59.875	5.34	1.082	0.98702	0.928818	0.994079	0.935127	1.02222
1794	Q8CJG0	Protein argonaute-2 OS=Mus musculus GN=Ago2 PE=1 SV=3 - [AGO2_MOUSE]	3	97.2419	58.981	4.53	0.896187	0.93492	1.54428	0.957543	0.990658	1.03306
1795	Q8BSF4	Phosphatidylserine decarboxylase proenzyme, mitochondrial OS=Mus musculus GN=Pisd PE=2 SV=1 - [PISD_MOUSE]	3	45.8976	58.2259	7.88	1.06059	0.826002	0.960841	0.866203	1.11543	1.00247
1796	A2APV2	Formin-like protein 2 OS=Mus musculus GN=Fmnl2 PE=1 SV=2 - [FMNL2_MOUSE]	3	123.024	57.4806	4.42	1.04085	0.991854	0.991616	1.04962	1.09375	0.866831
1797	P70195	Proteasome subunit beta type-7 OS=Mus musculus GN=Psmb7 PE=1 SV=1 - [PSB7_MOUSE]	3	29.8723	57.1592	10.83	0.930076	1.15476	1.07532	1.02613	0.99549	1.04722
1798	P97441	Zinc transporter 3 OS=Mus musculus GN=Slc30a3 PE=1 SV=1 - [ZNT3_MOUSE]	3	41.7972	57.1061	9.79	1.07654	1.02838	0.900834	1.04162	0.948473	0.887471
1799	Q9Z2H2	Regulator of G-protein signaling 6 OS=Mus musculus GN=Rgs6 PE=1 SV=2 - [RGS6_MOUSE]	3	54.4967	56.0223	12.29	0.98472	1.3124	1.15265	0.919325	1.02909	1.1267
1800	P54830	Tyrosine-protein phosphatase non-receptor type 5 OS=Mus musculus GN=Ptpn5 PE=1 SV=2 - [PTN5_MOUSE]	3	60.7764	55.8055	7.02	0.974457	0.797089	0.80336	0.948326	1.00249	0.939311
1801	B1AXV0	DOMON domain-containing protein FRRS1L OS=Mus musculus GN=Frrs1l PE=1 SV=1 - [FRS1L_MOUSE]	3	32.4859	55.5451	13.31	0.953632	0.976465	1.00871	0.920041	1.03212	0.993672
1802	Q61102	ATP-binding cassette sub-family B member 7, mitochondrial OS=Mus musculus GN=Abcb7 PE=1 SV=3 - [ABCB7_MOUSE]	3	82.529	54.9302	4.65	0.858947	0.9547	0.79547	1.01895	1.06434	0.798568
1803	Q8CFI0	E3 ubiquitin-protein ligase NEDD4-like OS=Mus musculus GN=Nedd4l PE=1 SV=2 - [NED4L_MOUSE]	3	115.347	54.7331	5.68	0.997261	0.991772	0.975224	0.938311	1.08074	1.0093
1804	Q9CQM5	Thioredoxin domain-containing protein 17 OS=Mus musculus GN=Txndc17 PE=1 SV=1 - [TXD17_MOUSE]	3	14.0057	54.6882	26.83	1.13123	0.895635	0.822109	1.03734	1.01088	1.06596
1805	P47791	Glutathione reductase, mitochondrial OS=Mus musculus GN=Gsr PE=1 SV=3 - [GSHR_MOUSE]	3	53.6285	54.4675	6.2	1.12739	0.890125	1.03781	1.09425	1.05916	1.09367
1806	Q9DBR3	Armadillo repeat-containing protein 8 OS=Mus musculus GN=Armc8 PE=1 SV=2 - [ARMC8_MOUSE]	3	75.3151	53.9966	4.16	1.0426	0.764397	0.946518	1.03198	1.04079	0.990202
1807	Q99JX4	Eukaryotic translation initiation factor 3 subunit M OS=Mus musculus GN=Eif3m PE=1 SV=1 - [EIF3M_MOUSE]	3	42.4899	53.4686	10.43	1.22973	0.979781	1.00841	0.997123	0.840383	0.931157
1808	Q9QZB9	Dynactin subunit 5 OS=Mus musculus GN=Dctn5 PE=1 SV=1 - [DCTN5_MOUSE]	3	20.1273	53.1743	14.84	0.947785	0.974651	1.00861	0.976893	0.994682	0.956516
1809	Q68EF6	Brain-enriched guanylate kinase-associated protein OS=Mus musculus GN=Begain PE=1 SV=2 - [BEGIN_MOUSE]	3	65.2688	53.05	5.83	0.999499	0.885351	0.788196	0.896822	0.981153	0.908268
1810	P36536	GTP-binding protein SAR1a OS=Mus musculus GN=Sar1a PE=1 SV=1 - [SAR1A_MOUSE]	3	22.3565	52.9606	18.69	1.03858	0.90261	0.825628	1.25497	1.07432	1.07997
1811	Q8BWT5	Disco-interacting protein 2 homolog A OS=Mus musculus GN=Dip2a PE=1 SV=3 - [DIP2A_MOUSE]	3	165.149	52.8782	3.15	1.00633	0.962982	0.96852	1.05568	1.28282	1.15756
1812	Q9JIX8	Apoptotic chromatin condensation inducer in the nucleus OS=Mus musculus GN=Acin1 PE=1 SV=3 - [ACINU_MOUSE]	3	150.629	52.3182	2.24	1.006	1.24114	1.12017	0.984644	1.00357	0.976098
1813	Q3TY60	Protein FAM131B OS=Mus musculus GN=Fam131b PE=1 SV=1 - [F131B_MOUSE]	3	35.9355	51.8134	10.24	0.963443	0.894349	0.982239	0.969883	0.99884	0.968572
1814	Q9D8B4	NADH dehydrogenase [ubiquinone] 1 alpha subcomplex subunit 11 OS=Mus musculus GN=Ndufa11 PE=1 SV=2 - [NDUAB_MOUSE]	3	14.9725	51.7879	26.24	0.904701	1.02127	1.08008	1.21253	0.949623	0.942492
1815	Q80UM7	Mannosyl-oligosaccharide glucosidase OS=Mus musculus GN=Mogs PE=1 SV=1 - [MOGS_MOUSE]	3	91.7744	50.7467	5.16	1.11991	0.821801	0.754106	1.02717	1.18396	0.90524
1816	Q9WVQ1	Membrane-associated guanylate kinase, WW and PDZ domain-containing protein 2 OS=Mus musculus GN=Magi2 PE=1 SV=2 - [MAGI2_MOUSE]	3	140.831	50.59	2.43	1.01872	0.809813	0.942667	1.06314	0.889369	0.964386
1817	G3XA57	Rab11 family-interacting protein 2 OS=Mus musculus GN=Rab11fip2 PE=1 SV=1 - [RFIP2_MOUSE]	3	58.1707	50.0197	7.42	1.01647	0.928611	0.967803	1.17855	1.00775	1.01956
1818	Q62351	Transferrin receptor protein 1 OS=Mus musculus GN=Tfrc PE=1 SV=1 - [TFR1_MOUSE]	3	85.6773	50.0134	4.72	0.945227	1.02555	1.11011	1.142	0.81739	0.777672
1819	Q9CWD8	Iron-sulfur protein NUBPL OS=Mus musculus GN=Nubpl PE=1 SV=2 - [NUBPL_MOUSE]	3	34.1169	49.5414	13.48	0.966082	0.861375	0.8525	1.15388	1.03015	1.10246
1820	Q9D8S4	Oligoribonuclease, mitochondrial OS=Mus musculus GN=Rexo2 PE=1 SV=2 - [ORN_MOUSE]	3	26.7216	49.4399	14.35	0.972463	0.816537	0.76638	0.988997	1.0443	1.02274
1821	O70503	Very-long-chain 3-oxoacyl-CoA reductase OS=Mus musculus GN=Hsd17b12 PE=1 SV=1 - [DHB12_MOUSE]	3	34.7194	48.9252	12.5	0.906577	1.09675	0.943363	0.982517	0.898764	0.943442
1822	Q8C078	Calcium/calmodulin-dependent protein kinase kinase 2 OS=Mus musculus GN=Camkk2 PE=1 SV=2 - [KKCC2_MOUSE]	3	64.5765	48.8259	5.61	1.01246	0.976053	0.953618	1.01401	0.990935	0.960464
1823	Q8C3Q5	Protein shisa-7 OS=Mus musculus GN=Shisa7 PE=1 SV=3 - [SHSA7_MOUSE]	3	58.2974	48.7818	3.94	0.901429	0.982724	1.01252	1.04989	0.996831	0.976611
1824	Q9DCB8	Iron-sulfur cluster assembly 2 homolog, mitochondrial OS=Mus musculus GN=Isca2 PE=1 SV=2 - [ISCA2_MOUSE]	3	16.7075	48.3375	28.57	1.17765	0.816804	0.900434	0.92118	1.20966	1.10029
1825	Q8K010	5-oxoprolinase OS=Mus musculus GN=Oplah PE=1 SV=1 - [OPLA_MOUSE]	3	137.525	48.24	2.25	0.958381	1.0904	0.978486	0.943583	0.96203	0.997873
1826	Q6ZWV7	60S ribosomal protein L35 OS=Mus musculus GN=Rpl35 PE=1 SV=1 - [RL35_MOUSE]	3	14.5436	48.2244	25.2	1.09174	1.01158	1.06491	0.991715	0.99922	1.0171
1827	Q69ZP3	Probable hydrolase PNKD OS=Mus musculus GN=Pnkd PE=1 SV=2 - [PNKD_MOUSE]	3	42.99	48.0399	8.57	1.00148	0.87624	0.893775	0.934251	0.992456	1.01969
1828	Q3TCN2	Putative phospholipase B-like 2 OS=Mus musculus GN=Plbd2 PE=1 SV=2 - [PLBL2_MOUSE]	3	66.2472	47.7108	5.39	1.22786	1.02625	1.15035	1.25252	1.06152	1.15834
1829	Q00558	Factor VIII intron 22 protein OS=Mus musculus GN=F8a1 PE=1 SV=1 - [F8I2_MOUSE]	3	40.4641	47.5921	13.42	1.09105	1.07751	1.03021	1.05439	0.922881	1.11118
1830	Q6ZQ82	Rho GTPase-activating protein 26 OS=Mus musculus GN=Arhgap26 PE=1 SV=3 - [RHG26_MOUSE]	3	92.0125	47.4986	4.3	0.983459	1.13653	1.03149	1.01273	0.852696	0.950296
1831	Q8BFQ8	Glutamine amidotransferase-like class 1 domain-containing protein 1 OS=Mus musculus GN=Gatd1 PE=1 SV=1 - [GALD1_MOUSE]	3	23.2628	47.4951	17.73	1.00307	0.874387	1.00503	0.826229	1.01232	0.987121
1832	Q9D7P6	Iron-sulfur cluster assembly enzyme ISCU, mitochondrial OS=Mus musculus GN=Iscu PE=1 SV=1 - [ISCU_MOUSE]	3	18.0866	47.341	20.24	1.05646	0.960855	1.12894	1.16295	0.924071	1.02576
1833	Q61166	Microtubule-associated protein RP/EB family member 1 OS=Mus musculus GN=Mapre1 PE=1 SV=3 - [MARE1_MOUSE]	3	29.9972	47.1743	17.16	1.15814	0.808658	0.885813	0.966697	1.15593	0.893425
1834	Q9CXW3	Calcyclin-binding protein OS=Mus musculus GN=Cacybp PE=1 SV=1 - [CYBP_MOUSE]	3	26.4938	47.1418	13.54	1.00882	0.94773	0.984794	1.10952	1.05613	1.0175
1835	Q9D6J5	NADH dehydrogenase [ubiquinone] 1 beta subcomplex subunit 8, mitochondrial OS=Mus musculus GN=Ndufb8 PE=1 SV=1 - [NDUB8_MOUSE]	3	21.8615	47.0634	19.35	0.901244	1.04966	1.15979	0.990472	0.983182	0.994701
1836	Q921Q7	Ras and Rab interactor 1 OS=Mus musculus GN=Rin1 PE=1 SV=1 - [RIN1_MOUSE]	3	82.9622	47.0408	4.46	0.894019	1.00601	1.03574	0.940598	0.969326	1.05488
1837	Q61137	Astrotactin-1 OS=Mus musculus GN=Astn1 PE=1 SV=4 - [ASTN1_MOUSE]	3	144.791	46.9592	3.76	0.817305	1.03339	0.941259	0.981899	0.926272	0.800896
1838	Q8K298	Anillin OS=Mus musculus GN=Anln PE=1 SV=2 - [ANLN_MOUSE]	3	122.718	46.4986	2.94	0.961719	1.1119	1.01291	0.875221	1.24396	1.17997
1839	Q9CYW4	Haloacid dehalogenase-like hydrolase domain-containing protein 3 OS=Mus musculus GN=Hdhd3 PE=1 SV=1 - [HDHD3_MOUSE]	3	28.0093	45.9212	10.76	0.979228	0.798657	1.00798	0.899838	1.16636	1.0949
1840	Q99JG2	Prosaposin receptor GPR37L1 OS=Mus musculus GN=Gpr37l1 PE=1 SV=2 - [ETBR2_MOUSE]	3	52.6938	45.8129	5.41	1.02237	1.06079	1.10576	1.0559	0.952758	1.06595
1841	P51880	Fatty acid-binding protein, brain OS=Mus musculus GN=Fabp7 PE=1 SV=2 - [FABP7_MOUSE]	3	14.8834	45.2956	22.73	1.35509	0.850386	0.656135	1.36024	1.08706	0.867796
1842	Q6PAK3	Protein arginine N-methyltransferase 8 OS=Mus musculus GN=Prmt8 PE=1 SV=2 - [ANM8_MOUSE]	3	45.2466	45.2283	10.41	0.986965	0.9967	0.985418	0.941007	1.08691	0.995692
1843	Q9ERR1	Nuclear distribution protein nudE-like 1 OS=Mus musculus GN=Ndel1 PE=1 SV=2 - [NDEL1_MOUSE]	3	38.3424	44.9513	9.28	1.01285	0.897416	0.90344	0.91163	1.06655	0.861946
1844	Q8C129	Leucyl-cystinyl aminopeptidase OS=Mus musculus GN=Lnpep PE=1 SV=1 - [LCAP_MOUSE]	3	117.229	44.3761	3.32	0.890295	1.05336	1.24117	1.16097	0.859276	0.859937
1845	Q9QZQ1	Afadin OS=Mus musculus GN=Afdn PE=1 SV=3 - [AFAD_MOUSE]	3	206.371	44.31	2.2	1.03139	1.02141	0.983949	1.02376	1.02404	0.953378
1846	Q8BXR9	Oxysterol-binding protein-related protein 6 OS=Mus musculus GN=Osbpl6 PE=1 SV=1 - [OSBL6_MOUSE]	3	108.852	44.1336	3.02	0.888035	0.991396	0.825339	1.12377	1.03409	0.909888
1847	Q9EST5	Acidic leucine-rich nuclear phosphoprotein 32 family member B OS=Mus musculus GN=Anp32b PE=1 SV=1 - [AN32B_MOUSE]	3	31.0601	43.9483	15.07	1.06348	1.23497	1.22488	0.93325	0.957493	1.01964
1848	Q9CRY7	Lysophospholipase D GDPD1 OS=Mus musculus GN=Gdpd1 PE=1 SV=1 - [GDPD1_MOUSE]	3	35.8439	43.868	12.1	0.966434	1.00097	1.01801	1.01682	0.915633	0.989167
1849	Q80Y98	Phospholipase DDHD2 OS=Mus musculus GN=Ddhd2 PE=1 SV=3 - [DDHD2_MOUSE]	3	79.5265	43.8516	4.58	1.11098	0.990251	0.943742	0.902253	0.98961	0.948375
1850	P45377	Aldose reductase-related protein 2 OS=Mus musculus GN=Akr1b8 PE=1 SV=2 - [ALD2_MOUSE]	3	36.0976	43.82	9.81	1.02047	0.902216	0.892305	1.11733	1.04107	0.954201
1851	Q9D2R6	Cytochrome c oxidase assembly factor 3 homolog, mitochondrial OS=Mus musculus GN=Coa3 PE=1 SV=1 - [COA3_MOUSE]	3	11.9792	43.71	28.7	0.888591	1.07008	1.05655	1.00706	1.06635	1.08586
1852	Q8CDG3	Deubiquitinating protein VCIP135 OS=Mus musculus GN=Vcpip1 PE=1 SV=1 - [VCIP1_MOUSE]	3	134.418	43.5353	2.95	0.795171	1.27766	1.21814	1.02671	1.08731	0.986069
1853	P27671	Ras-specific guanine nucleotide-releasing factor 1 OS=Mus musculus GN=Rasgrf1 PE=1 SV=2 - [RGRF1_MOUSE]	3	144.011	43.49	2.77	0.864462	1.06516	1.33391	0.918294	1.42599	0.919701
1854	Q9QXB9	Developmentally-regulated GTP-binding protein 2 OS=Mus musculus GN=Drg2 PE=1 SV=1 - [DRG2_MOUSE]	3	40.6924	43.4613	9.62	0.886509	1.20751	0.945147	1.1072	0.976773	0.946408
1855	Q9JKC8	AP-3 complex subunit mu-1 OS=Mus musculus GN=Ap3m1 PE=1 SV=1 - [AP3M1_MOUSE]	3	46.9063	43.1913	11.72	1.01767	0.975463	0.984055	1.02059	1.04274	0.887785
1856	P03930	ATP synthase protein 8 OS=Mus musculus GN=Mtatp8 PE=1 SV=1 - [ATP8_MOUSE]	3	7.76119	43.0246	35.82	0.921347	1.14996	1.1571	0.910323	0.874285	1.03462
1857	Q99JW2	Aminoacylase-1 OS=Mus musculus GN=Acy1 PE=1 SV=1 - [ACY1_MOUSE]	3	45.7521	42.625	9.56	0.828667	0.894566	0.983971	0.709821	1.19138	1.07707
1858	P62855	40S ribosomal protein S26 OS=Mus musculus GN=Rps26 PE=1 SV=3 - [RS26_MOUSE]	3	13.0071	42.3504	26.96	0.929912	0.942603	1.0248	0.991811	1.08594	1.06635
1859	Q99KP6	Pre-mRNA-processing factor 19 OS=Mus musculus GN=Prpf19 PE=1 SV=1 - [PRP19_MOUSE]	3	55.2044	42.2277	6.35	1.03508	0.89254	1.04065	0.97182	1.14156	0.941685
1860	Q9CZ04	COP9 signalosome complex subunit 7a OS=Mus musculus GN=Cops7a PE=1 SV=2 - [CSN7A_MOUSE]	3	30.206	42.0078	11.27	1.02843	1.02108	0.921555	1.0016	1.10694	1.1186
1861	Q8CJ40	Rootletin OS=Mus musculus GN=Crocc PE=1 SV=2 - [CROCC_MOUSE]	3	226.809	41.7741	2.09	0.931685	0.932324	0.792965	0.883589	0.994026	1.16956
1862	Q8R0Y8	Mitochondrial coenzyme A transporter SLC25A42 OS=Mus musculus GN=Slc25a42 PE=1 SV=1 - [S2542_MOUSE]	3	35.2186	41.53	10.38	1.02501	0.86747	0.887268	0.927045	0.871921	0.963114
1863	P43406	Integrin alpha-V OS=Mus musculus GN=Itgav PE=1 SV=2 - [ITAV_MOUSE]	3	115.287	41.4225	3.93	1.04759	1.08894	1.01289	0.885499	1.00255	1.02254
1864	Q91VC3	Eukaryotic initiation factor 4A-III OS=Mus musculus GN=Eif4a3 PE=1 SV=3 - [IF4A3_MOUSE]	3	46.8102	41.4177	11.92	0.901059	1.3446	1.20534	1.09428	0.944825	1.05967
1865	P47964	60S ribosomal protein L36 OS=Mus musculus GN=Rpl36 PE=3 SV=2 - [RL36_MOUSE]	3	12.2078	41.3915	23.81	1.06905	1.03351	1.0964	1.00344	0.92634	1.06941
1866	O35083	1-acyl-sn-glycerol-3-phosphate acyltransferase alpha OS=Mus musculus GN=Agpat1 PE=1 SV=1 - [PLCA_MOUSE]	3	31.6887	41.3	16.14	0.860076	1.06446	1.04225	1.03539	0.901879	0.8843
1867	Q3UTH8	Rho guanine nucleotide exchange factor 9 OS=Mus musculus GN=Arhgef9 PE=1 SV=1 - [ARHG9_MOUSE]	3	60.8881	41.0202	5.81	0.946026	0.976807	0.871754	0.98494	1.03694	0.993646
1868	O88703	Potassium/sodium hyperpolarization-activated cyclic nucleotide-gated channel 2 OS=Mus musculus GN=Hcn2 PE=1 SV=1 - [HCN2_MOUSE]	3	94.6612	40.9967	6.6	1.0217	1.04329	0.971542	0.937471	0.942964	0.966642
1869	Q6ZQ08	CCR4-NOT transcription complex subunit 1 OS=Mus musculus GN=Cnot1 PE=1 SV=2 - [CNOT1_MOUSE]	3	266.637	40.8539	1.47	0.948708	1.01833	0.994507	0.837466	1.03559	1.00906
1870	A2A432	Cullin-4B OS=Mus musculus GN=Cul4b PE=1 SV=1 - [CUL4B_MOUSE]	3	110.63	40.53	2.99	1.01806	1.14833	1.09546	0.97555	1.15049	1.22603
1871	Q9DC61	Mitochondrial-processing peptidase subunit alpha OS=Mus musculus GN=Pmpca PE=1 SV=1 - [MPPA_MOUSE]	3	58.2416	40.44	6.49	0.907913	1.02956	1.04073	0.975109	0.960576	0.91086
1872	Q9R0N0	Galactokinase OS=Mus musculus GN=Galk1 PE=1 SV=2 - [GALK1_MOUSE]	3	42.2685	39.9798	8.16	1.0001	0.956614	0.983561	0.907246	1.25312	1.01733
1873	Q8R3P0	Aspartoacylase OS=Mus musculus GN=Aspa PE=1 SV=2 - [ACY2_MOUSE]	3	35.3218	39.8148	8.97	1.00763	1.06016	0.929249	0.886994	1.27832	1.08456
1874	P53986	Monocarboxylate transporter 1 OS=Mus musculus GN=Slc16a1 PE=1 SV=1 - [MOT1_MOUSE]	3	53.2324	39.6756	6.49	0.878881	0.98694	1.01112	0.936949	0.893617	0.98784
1875	Q9R1P3	Proteasome subunit beta type-2 OS=Mus musculus GN=Psmb2 PE=1 SV=1 - [PSB2_MOUSE]	3	22.8917	39.456	16.92	1.00019	1.00236	0.990712	1.12113	1.00397	0.908391
1876	Q8QZT2	Centriole, cilia and spindle-associated protein OS=Mus musculus GN=Ccsap PE=1 SV=1 - [CCSAP_MOUSE]	3	28.3611	39.3081	12.3	1.05369	0.856131	0.880733	0.921721	1.06216	1.01142
1877	Q9D0L7	Armadillo repeat-containing protein 10 OS=Mus musculus GN=Armc10 PE=1 SV=1 - [ARM10_MOUSE]	3	33.2896	39.2596	12.09	0.90608	1.13551	1.13087	0.949443	0.959524	0.958426
1878	Q8K377	Leucine-rich repeat transmembrane neuronal protein 1 OS=Mus musculus GN=Lrrtm1 PE=2 SV=1 - [LRRT1_MOUSE]	3	58.6798	39.0991	5.94	0.827527	1.08705	0.905429	1.08675	1.13159	0.976676
1879	Q9JKL5	Calcineurin B homologous protein 3 OS=Mus musculus GN=Tesc PE=1 SV=2 - [CHP3_MOUSE]	3	24.5841	38.97	16.82	0.968823	1.15031	0.918446	0.980824	0.932227	0.985458
1880	Q9JKY5	Huntingtin-interacting protein 1-related protein OS=Mus musculus GN=Hip1r PE=1 SV=2 - [HIP1R_MOUSE]	3	119.353	38.9457	2.72	0.929732	1.00941	1.04931	0.868829	0.979895	0.998945
1881	Q64520	Guanylate kinase OS=Mus musculus GN=Guk1 PE=1 SV=2 - [KGUA_MOUSE]	3	21.9042	38.8679	19.19	1.09442	0.876192	0.836374	0.999887	1.12948	1.1156
1882	Q8BIG7	Catechol O-methyltransferase domain-containing protein 1 OS=Mus musculus GN=Comtd1 PE=1 SV=1 - [CMTD1_MOUSE]	3	28.9425	38.85	10.69	0.990408	1.01625	1.03475	1.05914	0.985469	0.907093
1883	Q8C0L0	Thioredoxin-related transmembrane protein 4 OS=Mus musculus GN=Tmx4 PE=1 SV=2 - [TMX4_MOUSE]	3	37.1078	38.85	10.75	1.00825	0.890546	0.96072	0.936176	0.949916	0.958787
1884	P59016	Vacuolar protein sorting-associated protein 33B OS=Mus musculus GN=Vps33b PE=1 SV=1 - [VP33B_MOUSE]	3	70.4815	38.41	5.02	0.844581	1.16152	0.975311	0.99316	0.973517	0.884599
1885	Q3TLI0	Trafficking protein particle complex subunit 10 OS=Mus musculus GN=Trappc10 PE=1 SV=2 - [TPC10_MOUSE]	3	141.499	38	2.94	0.943217	0.852526	0.916137	1.25465	0.881415	0.700289
1886	Q9JIG7	Coiled-coil domain-containing protein 22 OS=Mus musculus GN=Ccdc22 PE=1 SV=1 - [CCD22_MOUSE]	3	70.7998	37.93	4.63	1.19457	0.885407	0.986381	0.837818	1.18892	1.05336
1887	Q6NVF9	Cleavage and polyadenylation specificity factor subunit 6 OS=Mus musculus GN=Cpsf6 PE=1 SV=1 - [CPSF6_MOUSE]	3	59.1164	37.7106	6.17	0.878826	1.0283	1.19011	0.841804	1.16595	1.11971
1888	Q8C7R4	Ubiquitin-like modifier-activating enzyme 6 OS=Mus musculus GN=Uba6 PE=1 SV=1 - [UBA6_MOUSE]	3	117.891	37.5614	3.99	0.930945	0.935909	0.923108	1.11048	0.923944	0.980407
1889	Q3U7R1	Extended synaptotagmin-1 OS=Mus musculus GN=Esyt1 PE=1 SV=2 - [ESYT1_MOUSE]	3	121.478	37.48	3.21	0.909589	1.01928	1.0772	0.934665	1.15731	1.13301
1890	Q60714	Long-chain fatty acid transport protein 1 OS=Mus musculus GN=Slc27a1 PE=1 SV=1 - [S27A1_MOUSE]	3	71.2306	37.0597	5.88	0.973007	1.19885	1.13701	1.03514	0.996554	0.914921
1891	Q05512	Serine/threonine-protein kinase MARK2 OS=Mus musculus GN=Mark2 PE=1 SV=3 - [MARK2_MOUSE]	3	86.2522	37.0265	10.57	0.883843	1.06877	0.983527	1.02781	1.08996	0.986516
1892	B1AR13	CDGSH iron-sulfur domain-containing protein 3, mitochondrial OS=Mus musculus GN=Cisd3 PE=1 SV=1 - [CISD3_MOUSE]	3	15.6661	36.9036	15.33	0.973824	1.03176	1.15084	1.00548	0.899248	1.06568
1893	Q91VT4	Carbonyl reductase family member 4 OS=Mus musculus GN=Cbr4 PE=1 SV=2 - [CBR4_MOUSE]	3	25.3985	36.6462	20.76	0.980016	0.905499	0.951492	1.08574	1.08585	0.90459
1894	Q62189	U1 small nuclear ribonucleoprotein A OS=Mus musculus GN=Snrpa PE=1 SV=3 - [SNRPA_MOUSE]	3	31.8145	36.2728	9.76	1.03694	0.937822	1.13754	1.03755	1.0293	1.07641
1895	Q9QZB0	Regulator of G-protein signaling 17 OS=Mus musculus GN=Rgs17 PE=1 SV=1 - [RGS17_MOUSE]	3	24.3295	36.2024	16.19	0.997305	0.999266	1.02654	1.05861	0.856893	0.974593
1896	Q9JKL4	NADH dehydrogenase [ubiquinone] 1 alpha subcomplex assembly factor 3 OS=Mus musculus GN=Ndufaf3 PE=1 SV=1 - [NDUF3_MOUSE]	3	20.7205	36.07	24.32	1.20224	0.796464	0.899289	1.00004	1.10585	0.766215
1897	O35639	Annexin A3 OS=Mus musculus GN=Anxa3 PE=1 SV=4 - [ANXA3_MOUSE]	3	36.3616	35.9684	10.53	1.23144	1.00241	0.896908	1.17525	0.878293	1.00291
1898	Q8C754	Vacuolar protein sorting-associated protein 52 homolog OS=Mus musculus GN=Vps52 PE=1 SV=1 - [VPS52_MOUSE]	3	81.9926	35.8492	4.7	1.0427	0.90301	0.938578	0.934609	1.04557	0.966113
1899	Q05793	Basement membrane-specific heparan sulfate proteoglycan core protein OS=Mus musculus GN=Hspg2 PE=1 SV=1 - [PGBM_MOUSE]	3	398.039	35.5745	0.89	0.964501	0.951374	0.922139	1.02537	1.16148	1.17071
1900	O09167	60S ribosomal protein L21 OS=Mus musculus GN=Rpl21 PE=1 SV=3 - [RL21_MOUSE]	3	18.5501	35.52	20.63	1.05161	0.863512	0.868302	0.996662	1.038	0.990323
1901	Q920P3	BMP/retinoic acid-inducible neural-specific protein 1 OS=Mus musculus GN=Brinp1 PE=1 SV=1 - [BRNP1_MOUSE]	3	88.5843	35.5	3.55	0.952007	0.930006	1.07243	0.988005	0.914821	0.872817
1902	Q9Z275	Retinaldehyde-binding protein 1 OS=Mus musculus GN=Rlbp1 PE=1 SV=3 - [RLBP1_MOUSE]	3	36.3854	34.9307	9.78	1.02559	1.16328	1.11909	1.02991	1.01611	1.00153
1903	Q8BTG7	Protein NDRG4 OS=Mus musculus GN=Ndrg4 PE=1 SV=1 - [NDRG4_MOUSE]	3	38.4841	34.7769	12.5	1.06942	1.01628	0.961964	1.07411	1.04102	1.06632
1904	O55033	Cytoplasmic protein NCK2 OS=Mus musculus GN=Nck2 PE=1 SV=1 - [NCK2_MOUSE]	3	42.8525	34.7248	7.89	0.862613	1.03803	1.15893	1.032	1.01611	0.970236
1905	Q8VCX5	Calcium uptake protein 1, mitochondrial OS=Mus musculus GN=Micu1 PE=1 SV=1 - [MICU1_MOUSE]	3	54.3184	34.37	7.76	0.885723	1.06741	1.07403	0.991075	1.02172	1.0844
1906	Q9EST4	Proteasome assembly chaperone 2 OS=Mus musculus GN=Psmg2 PE=1 SV=1 - [PSMG2_MOUSE]	3	29.505	34.28	11.36	0.918299	1.00089	0.921468	0.940491	1.06484	1.09654
1907	O70194	Eukaryotic translation initiation factor 3 subunit D OS=Mus musculus GN=Eif3d PE=1 SV=2 - [EIF3D_MOUSE]	3	63.9484	34.0406	6.39	0.985903	0.981974	1.02194	1.00898	0.924637	0.964884
1908	Q8K3X4	Interferon regulatory factor 2-binding protein-like OS=Mus musculus GN=Irf2bpl PE=1 SV=1 - [I2BPL_MOUSE]	3	80.514	33.9601	5.55	1.0262	0.871449	0.947304	1.14534	1.17312	0.819819
1909	Q8R010	Aminoacyl tRNA synthase complex-interacting multifunctional protein 2 OS=Mus musculus GN=Aimp2 PE=1 SV=2 - [AIMP2_MOUSE]	3	35.3552	33.96	13.13	1.14317	0.72472	0.720933	1.10871	0.975944	0.90716
1910	Q9WUR2	Enoyl-CoA delta isomerase 2, mitochondrial OS=Mus musculus GN=Eci2 PE=1 SV=2 - [ECI2_MOUSE]	3	43.24	33.78	10.74	0.908227	1.04359	1.08285	1.05569	1.20251	1.01096
1911	Q8VEL9	GTP-binding protein REM 2 OS=Mus musculus GN=Rem2 PE=1 SV=2 - [REM2_MOUSE]	3	37.344	33.69	9.97	0.971342	0.819354	0.678108	0.834915	1.1383	1.00683
1912	Q9CQC6	Basic leucine zipper and W2 domain-containing protein 1 OS=Mus musculus GN=Bzw1 PE=1 SV=1 - [BZW1_MOUSE]	3	48.0127	33.6873	5.97	1.11292	0.893766	0.88339	0.965342	1.08111	1.03451
1913	Q8K4Q0	Regulatory-associated protein of mTOR OS=Mus musculus GN=Rptor PE=1 SV=1 - [RPTOR_MOUSE]	3	149.375	33.6063	2.77	1.05938	0.847033	0.821508	1.0261	0.939676	0.920922
1914	P97371	Proteasome activator complex subunit 1 OS=Mus musculus GN=Psme1 PE=1 SV=2 - [PSME1_MOUSE]	3	28.655	33.5588	11.65	1.19268	1.00603	0.906118	1.10053	1.07766	0.940484
1915	P35550	rRNA 2'-O-methyltransferase fibrillarin OS=Mus musculus GN=Fbl PE=1 SV=2 - [FBRL_MOUSE]	3	34.2857	33.31	8.87	0.967818	0.995138	0.992395	1.05758	1.00099	0.991823
1916	Q8K4X7	1-acyl-sn-glycerol-3-phosphate acyltransferase delta OS=Mus musculus GN=Agpat4 PE=1 SV=1 - [PLCD_MOUSE]	3	43.7815	33.0929	8.2	1.02163	0.950587	0.980621	0.893799	1.05061	0.963798
1917	P03888	NADH-ubiquinone oxidoreductase chain 1 OS=Mus musculus GN=Mtnd1 PE=1 SV=3 - [NU1M_MOUSE]	3	36.035	33.0077	8.81	0.842502	1.10661	1.09691	0.972887	0.912209	0.990604
1918	Q60749	KH domain-containing, RNA-binding, signal transduction-associated protein 1 OS=Mus musculus GN=Khdrbs1 PE=1 SV=2 - [KHDR1_MOUSE]	3	48.3404	32.8921	6.32	1.03753	1.07528	1.07471	0.962885	0.935535	0.965072
1919	Q3U5Q7	UMP-CMP kinase 2, mitochondrial OS=Mus musculus GN=Cmpk2 PE=1 SV=2 - [CMPK2_MOUSE]	3	50.0047	32.7548	8.5	0.916797	0.947599	1.02497	1.01122	1.0874	0.96146
1920	Q5SVL6	Rap1 GTPase-activating protein 2 OS=Mus musculus GN=Rap1gap2 PE=1 SV=1 - [RPGP2_MOUSE]	3	78.2049	32.6564	4.07	1.07538	0.935292	1.01324	1.0159	1.02157	0.935142
1921	Q9CXI0	2-methoxy-6-polyprenyl-1,4-benzoquinol methylase, mitochondrial OS=Mus musculus GN=Coq5 PE=1 SV=2 - [COQ5_MOUSE]	3	37.3118	32.58	10.09	1.06946	0.887902	1.06247	1.07879	0.931161	1.05869
1922	P40336	Vacuolar protein sorting-associated protein 26A OS=Mus musculus GN=Vps26a PE=1 SV=1 - [VP26A_MOUSE]	3	38.0897	32.2689	10.09	1.04772	1.00369	0.935987	1.12208	0.960784	0.940692
1923	Q3TFQ1	SPRY domain-containing protein 7 OS=Mus musculus GN=Spryd7 PE=1 SV=2 - [SPRY7_MOUSE]	3	21.6666	32.1105	16.33	0.885892	1.04917	1.07209	0.932802	1.01168	1.00207
1924	P22723	Gamma-aminobutyric acid receptor subunit gamma-2 OS=Mus musculus GN=Gabrg2 PE=1 SV=3 - [GBRG2_MOUSE]	3	55.0628	31.8912	6.12	1.01528	1.00016	1.0357	0.974838	0.98122	1.01451
1925	Q03141	MAP/microtubule affinity-regulating kinase 3 OS=Mus musculus GN=Mark3 PE=1 SV=2 - [MARK3_MOUSE]	3	84.337	31.87	8.63	1.16737	0.889152	1.05438	0.854314	1.0276	1.03069
1926	Q99MN1	Lysine--tRNA ligase OS=Mus musculus GN=Kars PE=1 SV=1 - [SYK_MOUSE]	3	67.7965	31.7855	4.2	1.03593	0.990116	0.9716	1.04514	1.08354	0.995555
1927	Q8K2K6	Arf-GAP domain and FG repeat-containing protein 1 OS=Mus musculus GN=Agfg1 PE=1 SV=2 - [AGFG1_MOUSE]	3	58.007	31.63	5.35	1.02722	0.87589	0.919172	0.961249	1.07351	1.06061
1928	Q9DC16	Endoplasmic reticulum-Golgi intermediate compartment protein 1 OS=Mus musculus GN=Ergic1 PE=1 SV=1 - [ERGI1_MOUSE]	3	32.5415	31.4513	8.97	0.867003	0.882239	1.08119	0.928107	0.952328	1.04285
1929	Q8BWM0	Prostaglandin E synthase 2 OS=Mus musculus GN=Ptges2 PE=1 SV=3 - [PGES2_MOUSE]	3	43.2962	31.42	12.24	0.741295	1.22403	1.07633	0.850097	1.13192	0.998672
1930	Q6P8X1	Sorting nexin-6 OS=Mus musculus GN=Snx6 PE=1 SV=2 - [SNX6_MOUSE]	3	46.6198	31.38	8.87	1.21112	0.873717	0.960364	0.956749	1.05765	0.958327
1931	Q6VNB8	WD repeat and FYVE domain-containing protein 3 OS=Mus musculus GN=Wdfy3 PE=1 SV=1 - [WDFY3_MOUSE]	3	392.088	31.2915	0.97	1.06022	0.951491	0.813563	0.995824	1.18023	0.986777
1932	Q80VC9	Calmodulin-regulated spectrin-associated protein 3 OS=Mus musculus GN=Camsap3 PE=1 SV=1 - [CAMP3_MOUSE]	3	135.091	31.1488	2.16	0.961472	0.975309	0.871928	1.06022	0.943347	0.86975
1933	Q68FM6	Protein phosphatase 1 regulatory subunit 29 OS=Mus musculus GN=Elfn2 PE=1 SV=1 - [PPR29_MOUSE]	3	89.9724	31.0959	4.74	0.94061	0.87768	1.03604	1.08956	1.00617	0.964323
1934	Q8BH57	WD repeat-containing protein 48 OS=Mus musculus GN=Wdr48 PE=1 SV=1 - [WDR48_MOUSE]	3	75.9594	30.88	5.33	1.07201	0.964407	1.03877	1.05606	1.05051	0.956108
1935	P54923	[Protein ADP-ribosylarginine] hydrolase OS=Mus musculus GN=Adprh PE=1 SV=1 - [ADPRH_MOUSE]	3	40.0424	30.6824	9.67	1.02919	1.04749	1.01503	1.08818	0.870062	0.958501
1936	Q9EQQ9	Protein O-GlcNAcase OS=Mus musculus GN=Mgea5 PE=1 SV=2 - [OGA_MOUSE]	3	103.096	30.12	3.71	0.989352	1.01253	0.891971	0.931721	1.0336	1.06282
1937	Q6DFV3	Rho GTPase-activating protein 21 OS=Mus musculus GN=Arhgap21 PE=1 SV=1 - [RHG21_MOUSE]	3	215.611	29.9911	1.65	0.925425	0.958694	1.03547	0.913304	1.13127	1.03627
1938	Q8K274	Ketosamine-3-kinase OS=Mus musculus GN=Fn3krp PE=1 SV=2 - [KT3K_MOUSE]	3	34.4463	29.9479	10.36	1.00396	1.0546	1.03803	0.922962	1.04703	1.2104
1939	Q9QXW9	Large neutral amino acids transporter small subunit 2 OS=Mus musculus GN=Slc7a8 PE=1 SV=1 - [LAT2_MOUSE]	3	57.8355	29.91	4.52	0.910416	1.0444	1.10465	0.742338	0.958533	1.1793
1940	Q9Z2D0	Myotubularin-related protein 9 OS=Mus musculus GN=Mtmr9 PE=1 SV=2 - [MTMR9_MOUSE]	3	62.8679	29.49	4.95	1.02594	1.00798	1.01622	0.994061	0.991756	1.00431
1941	Q9D7X1	BTB/POZ domain-containing protein KCTD4 OS=Mus musculus GN=Kctd4 PE=1 SV=1 - [KCTD4_MOUSE]	3	29.9594	29.4678	11.2	0.920693	0.911909	0.885355	1.04745	0.86978	0.965701
1942	O08586	Phosphatidylinositol 3,4,5-trisphosphate 3-phosphatase and dual-specificity protein phosphatase PTEN OS=Mus musculus GN=Pten PE=1 SV=1 - [PTEN_MOUSE]	3	47.1221	29.42	6.95	1.01645	0.971803	0.987253	1.04221	1.00559	0.99273
1943	P97952	Sodium channel subunit beta-1 OS=Mus musculus GN=Scn1b PE=1 SV=1 - [SCN1B_MOUSE]	3	24.6342	29.4127	17.43	0.900682	1.16344	1.01198	0.856115	0.948507	1.01575
1944	Q91XD7	Cysteine-rich with EGF-like domain protein 1 OS=Mus musculus GN=Creld1 PE=1 SV=1 - [CREL1_MOUSE]	3	45.687	29.2673	7.62	1.02112	1.20459	0.888734	0.982118	1.08866	0.976106
1945	Q9WUP7	Ubiquitin carboxyl-terminal hydrolase isozyme L5 OS=Mus musculus GN=Uchl5 PE=1 SV=2 - [UCHL5_MOUSE]	3	37.5931	29.2621	9.12	1.00163	1.05059	1.14091	1.05893	0.994191	0.919495
1946	P10518	Delta-aminolevulinic acid dehydratase OS=Mus musculus GN=Alad PE=1 SV=1 - [HEM2_MOUSE]	3	36.0003	29.1604	10	1.07829	0.756388	0.96489	0.890783	1.18864	1.14298
1947	P61022	Calcineurin B homologous protein 1 OS=Mus musculus GN=Chp1 PE=1 SV=2 - [CHP1_MOUSE]	3	22.4183	29.12	20	0.881005	0.741718	0.996389	0.816571	1.30861	1.16326
1948	Q3U0M1	Trafficking protein particle complex subunit 9 OS=Mus musculus GN=Trappc9 PE=1 SV=2 - [TPPC9_MOUSE]	3	128.15	29.0346	3.4	0.952886	0.85199	0.80233	1.05409	1.05366	0.953421
1949	Q3TMH2	Secernin-3 OS=Mus musculus GN=Scrn3 PE=1 SV=1 - [SCRN3_MOUSE]	3	47.6309	29	7.18	1.06222	0.862086	0.98889	1.09456	1.03016	0.960575
1950	Q8K0E8	Fibrinogen beta chain OS=Mus musculus GN=Fgb PE=1 SV=1 - [FIBB_MOUSE]	3	54.7177	28.97	11.43	0.866456	1.22854	1.2198	0.956295	1.09558	1.01695
1951	Q6PHS9	Voltage-dependent calcium channel subunit alpha-2/delta-2 OS=Mus musculus GN=Cacna2d2 PE=1 SV=1 - [CA2D2_MOUSE]	3	130.303	28.91	2.43	0.929194	0.889195	0.921379	1.04532	1.06587	1.01688
1952	P70280	Vesicle-associated membrane protein 7 OS=Mus musculus GN=Vamp7 PE=1 SV=1 - [VAMP7_MOUSE]	3	24.951	28.7973	13.64	1.00602	0.976897	0.88669	1.1338	0.996765	0.912829
1953	Q8VBY2	Calcium/calmodulin-dependent protein kinase kinase 1 OS=Mus musculus GN=Camkk1 PE=1 SV=1 - [KKCC1_MOUSE]	3	55.8025	28.7	6.14	1.18046	0.854361	0.871008	0.923205	1.12906	0.922834
1954	Q5DQR4	Syntaxin-binding protein 5-like OS=Mus musculus GN=Stxbp5l PE=1 SV=1 - [STB5L_MOUSE]	3	131.76	28.6071	4.14	1.03637	0.924973	0.915584	0.914692	0.99089	1.04994
1955	Q8BK30	NADH dehydrogenase [ubiquinone] flavoprotein 3, mitochondrial OS=Mus musculus GN=Ndufv3 PE=1 SV=1 - [NDUV3_MOUSE]	3	11.8063	28.5913	20.19	1.0055	0.844768	1.01517	0.928625	1.07119	0.969282
1956	Q99L45	Eukaryotic translation initiation factor 2 subunit 2 OS=Mus musculus GN=Eif2s2 PE=1 SV=1 - [IF2B_MOUSE]	3	38.0682	28.3903	7.85	1.05077	1.01916	1.02947	0.913619	0.96481	1.04401
1957	Q62426	Cystatin-B OS=Mus musculus GN=Cstb PE=1 SV=1 - [CYTB_MOUSE]	3	11.0385	28.3	24.49	1.06084	1.00872	1.06141	0.96569	0.993414	1.10678
1958	Q64444	Carbonic anhydrase 4 OS=Mus musculus GN=Ca4 PE=1 SV=1 - [CAH4_MOUSE]	3	34.3295	28.11	10.82	1.01714	0.912433	0.967488	1.12379	1.07838	0.948774
1959	Q7TQ95	Endoplasmic reticulum junction formation protein lunapark OS=Mus musculus GN=Lnpk PE=1 SV=1 - [LNP_MOUSE]	3	47.4704	27.5494	7.06	0.848398	1.13509	1.033	0.978538	0.857113	0.997943
1960	Q61771	Kinesin-like protein KIF3B OS=Mus musculus GN=Kif3b PE=1 SV=1 - [KIF3B_MOUSE]	3	85.2358	27.4332	3.35	0.99994	0.902736	0.853996	1.05334	1.00336	0.954627
1961	Q8K0D5	Elongation factor G, mitochondrial OS=Mus musculus GN=Gfm1 PE=1 SV=1 - [EFGM_MOUSE]	3	83.4965	27.29	4.26	1.07973	0.869717	0.82455	1.18374	1.01687	0.875112
1962	Q8BP40	Lysophosphatidic acid phosphatase type 6 OS=Mus musculus GN=Acp6 PE=1 SV=1 - [PPA6_MOUSE]	3	47.5946	27.17	5.26	1.04364	1.01228	1.11985	0.916779	1.06712	1.14816
1963	Q6ZQI3	Malectin OS=Mus musculus GN=Mlec PE=1 SV=2 - [MLEC_MOUSE]	3	32.3218	26.99	12.03	0.943183	0.931315	0.987353	1.07547	1.09086	0.867185
1964	Q2TBE6	Phosphatidylinositol 4-kinase type 2-alpha OS=Mus musculus GN=Pi4k2a PE=1 SV=1 - [P4K2A_MOUSE]	3	54.2236	26.8791	7.52	1.14166	0.865632	0.838345	1.0431	0.836671	0.826787
1965	Q5XG69	Soluble lamin-associated protein of 75 kDa OS=Mus musculus GN=Fam169a PE=1 SV=3 - [F169A_MOUSE]	3	73.1949	26.84	5.56	1.00102	0.837157	0.971806	0.884927	0.956466	0.951046
1966	Q9CX56	26S proteasome non-ATPase regulatory subunit 8 OS=Mus musculus GN=Psmd8 PE=1 SV=2 - [PSMD8_MOUSE]	3	39.905	26.59	6.8	0.942213	0.954407	1.03953	0.994991	0.94471	1.02635
1967	Q9WV96	Mitochondrial import inner membrane translocase subunit Tim10 B OS=Mus musculus GN=Timm10b PE=1 SV=1 - [T10B_MOUSE]	3	11.3066	26.4107	50	0.973505	0.913733	1.01938	1.12995	1.00947	0.930992
1968	Q9ERB0	Synaptosomal-associated protein 29 OS=Mus musculus GN=Snap29 PE=1 SV=1 - [SNP29_MOUSE]	3	29.5539	26.32	11.92	1.03348	0.943867	0.972548	0.881646	1.23184	0.987203
1969	Q9Z1K5	E3 ubiquitin-protein ligase ARIH1 OS=Mus musculus GN=Arih1 PE=1 SV=3 - [ARI1_MOUSE]	3	63.9747	25.857	5.95	0.949356	0.955073	0.909875	0.969733	0.994267	0.988258
1970	Q9QUR7	Peptidyl-prolyl cis-trans isomerase NIMA-interacting 1 OS=Mus musculus GN=Pin1 PE=1 SV=1 - [PIN1_MOUSE]	3	18.3591	25.8242	21.21	1.04981	1.00143	1.08415	0.995616	0.954091	1.03327
1971	Q8BFR4	N-acetylglucosamine-6-sulfatase OS=Mus musculus GN=Gns PE=1 SV=1 - [GNS_MOUSE]	3	61.1357	25.68	5.51	1.06154	1.03583	0.937912	0.995239	1.20139	1.08587
1972	Q8CC88	von Willebrand factor A domain-containing protein 8 OS=Mus musculus GN=Vwa8 PE=1 SV=2 - [VWA8_MOUSE]	3	213.287	25.5466	1.57	0.982753	0.87473	0.933073	0.860556	0.978672	1.04814
1973	Q9R1V4	Disintegrin and metalloproteinase domain-containing protein 11 OS=Mus musculus GN=Adam11 PE=1 SV=2 - [ADA11_MOUSE]	3	84.0799	25.43	4.01	0.990005	0.964152	0.973387	0.953256	1.1069	0.969521
1974	Q8BK63	Casein kinase I isoform alpha OS=Mus musculus GN=Csnk1a1 PE=1 SV=2 - [KC1A_MOUSE]	3	38.8899	25.39	9.2	0.915409	0.822178	1.13713	0.903251	0.943967	1.11178
1975	Q60870	Receptor expression-enhancing protein 5 OS=Mus musculus GN=Reep5 PE=1 SV=1 - [REEP5_MOUSE]	3	21.0369	25.09	14.59	1.06857	0.987233	0.967098	0.916378	1.03724	1.09212
1976	P17563	Selenium-binding protein 1 OS=Mus musculus GN=Selenbp1 PE=1 SV=2 - [SBP1_MOUSE]	3	52.4804	25.0544	6.99	0.930486	0.865636	0.98034	0.941666	1.10459	0.988426
1977	Q91YP2	Neurolysin, mitochondrial OS=Mus musculus GN=Nln PE=1 SV=1 - [NEUL_MOUSE]	3	80.3775	25.02	4.55	1.04781	1.13437	1.1417	0.974236	0.92821	1.00014
1978	Q9JM13	Rab5 GDP/GTP exchange factor OS=Mus musculus GN=Rabgef1 PE=1 SV=1 - [RABX5_MOUSE]	3	56.8326	24.76	5.91	1.12245	0.89996	0.95505	0.893925	0.931583	0.888229
1979	Q61097	Kinase suppressor of Ras 1 OS=Mus musculus GN=Ksr1 PE=1 SV=1 - [KSR1_MOUSE]	3	96.6941	24.62	3.32	1.04746	0.964655	0.990253	1.01976	0.978637	0.92551
1980	A2ADY9	Protein DDI1 homolog 2 OS=Mus musculus GN=Ddi2 PE=1 SV=1 - [DDI2_MOUSE]	3	44.5625	24.6194	7.77	0.954358	1.06857	1.05046	0.951859	1.018	1.06969
1981	Q8K4Z5	Splicing factor 3A subunit 1 OS=Mus musculus GN=Sf3a1 PE=1 SV=1 - [SF3A1_MOUSE]	3	88.4894	24.2458	3.79	0.889047	1.10034	1.08565	0.95266	1.03288	1.01016
1982	O08688	Calpain-5 OS=Mus musculus GN=Capn5 PE=1 SV=1 - [CAN5_MOUSE]	3	72.9086	24.17	5	0.978967	1.05767	0.982614	0.905187	1.0125	1.00312
1983	Q80UM3	N-alpha-acetyltransferase 15, NatA auxiliary subunit OS=Mus musculus GN=Naa15 PE=1 SV=1 - [NAA15_MOUSE]	3	100.897	23.7681	3.24	0.910432	0.918344	0.916102	1.05899	1.09317	1.07716
1984	Q8BX10	Serine/threonine-protein phosphatase PGAM5, mitochondrial OS=Mus musculus GN=Pgam5 PE=1 SV=1 - [PGAM5_MOUSE]	3	31.9746	23.75	7.29	1.06211	0.981675	1.01172	0.936906	0.963865	0.967138
1985	Q99NB9	Splicing factor 3B subunit 1 OS=Mus musculus GN=Sf3b1 PE=1 SV=1 - [SF3B1_MOUSE]	3	145.724	23.55	2.53	1.18164	0.859832	0.836803	0.839362	0.952861	1.03239
1986	Q8VCM7	Fibrinogen gamma chain OS=Mus musculus GN=Fgg PE=1 SV=1 - [FIBG_MOUSE]	3	49.3598	23.4055	6.19	0.917663	1.15052	1.21328	0.64246	1.41653	1.23403
1987	Q9JMF3	Guanine nucleotide-binding protein G(I)/G(S)/G(O) subunit gamma-13 OS=Mus musculus GN=Gng13 PE=1 SV=1 - [GBG13_MOUSE]	3	7.9741	22.81	38.81	0.935463	1.03743	1.11993	0.956096	0.894613	0.928144
1988	P49025	Citron Rho-interacting kinase OS=Mus musculus GN=Cit PE=1 SV=3 - [CTRO_MOUSE]	3	235.242	22.55	1.17	0.908583	0.994882	1.07988	0.885412	0.87614	0.939289
1989	Q9ESN9	C-Jun-amino-terminal kinase-interacting protein 3 OS=Mus musculus GN=Mapk8ip3 PE=1 SV=1 - [JIP3_MOUSE]	3	147.469	22.55	2.09	1.15894	0.801523	0.8364	0.935718	1.03528	0.985418
1990	Q99K28	ADP-ribosylation factor GTPase-activating protein 2 OS=Mus musculus GN=Arfgap2 PE=1 SV=1 - [ARFG2_MOUSE]	3	56.5631	22.4837	6.35	1.06995	0.985046	0.936837	0.986349	0.943849	0.972237
1991	Q8K1J6	CCA tRNA nucleotidyltransferase 1, mitochondrial OS=Mus musculus GN=Trnt1 PE=1 SV=1 - [TRNT1_MOUSE]	3	49.864	22.27	7.6	1.0265	0.97149	1.05722	1.0291	1.0187	0.935547
1992	Q8C8T8	Pre-rRNA-processing protein TSR2 homolog OS=Mus musculus GN=Tsr2 PE=1 SV=1 - [TSR2_MOUSE]	3	20.878	22.08	17.8	1.02281	1.01012	1.09032	1.0809	1.05125	1.03959
1993	Q9CYR0	Single-stranded DNA-binding protein, mitochondrial OS=Mus musculus GN=Ssbp1 PE=1 SV=1 - [SSBP_MOUSE]	3	17.308	22.06	16.45	1.14893	0.8472	0.919705	1.07596	0.961836	1.035
1994	Q8BGS2	BolA-like protein 2 OS=Mus musculus GN=Bola2 PE=1 SV=1 - [BOLA2_MOUSE]	3	10.2082	21.7038	40.7	1.005	0.933298	0.959625	0.985495	1.0495	1.03717
1995	Q8BNU0	Armadillo repeat-containing protein 6 OS=Mus musculus GN=Armc6 PE=1 SV=1 - [ARMC6_MOUSE]	3	50.6512	21.6634	9.4	0.925202	0.937384	0.956913	1.02911	1.01016	1.07849
1996	O35855	Branched-chain-amino-acid aminotransferase, mitochondrial OS=Mus musculus GN=Bcat2 PE=1 SV=2 - [BCAT2_MOUSE]	3	44.0988	21.63	8.4	0.935219	0.946026	0.955606	0.967126	0.971697	1.21925
1997	Q8VDM6	Heterogeneous nuclear ribonucleoprotein U-like protein 1 OS=Mus musculus GN=Hnrnpul1 PE=1 SV=1 - [HNRL1_MOUSE]	3	95.9425	21.3939	4.19	0.936652	0.964768	1.0498	0.957275	0.93509	1.0089
1998	Q60803	TNF receptor-associated factor 3 OS=Mus musculus GN=Traf3 PE=1 SV=2 - [TRAF3_MOUSE]	3	64.2521	21.2265	5.29	0.865665	1.0668	0.90132	1.11056	0.849991	0.786404
1999	P34152	Focal adhesion kinase 1 OS=Mus musculus GN=Ptk2 PE=1 SV=3 - [FAK1_MOUSE]	3	123.458	21.03	4.22	1.06937	1.01721	1.0107	1.15842	1.15167	0.926081
[truncated: 991 more rows]

## Sheet: 表头说明
Items	说明
No.	序号
Accession	蛋白Accession号
Description	蛋白质具体名称及描述信息
MW [kDa]	蛋白质的理论分子量
Score	蛋白质的鉴定得分，得分越高，说明该蛋白鉴定的可靠性越高。
Coverage (%)	肽段覆盖率
Unique Peptide	检测到的唯一肽段数
实验组_vs_对照组	组间蛋白相对丰度比值
备注：组间蛋白对Fold Change>=X的数据进行标注：比值>=X的标为红色，表示上调X倍以上；比值<=1/X标为绿色，表示下调X倍以上。其中，X表示组间调变倍数。
