# Supplementary material for: Gardenia jasminoides J. Ellis extract alleviated white matter damage through promoting the differentiation of oligodendrocyte precursor cells via suppressing neuroinflammation
Source: Royal Society of Chemistry journal article supplement (doi:10.1039/d1fo02127c), 2022-01-01
Supplement: d1fo02127c2.pdf [file d1fo02127c2.pdf]

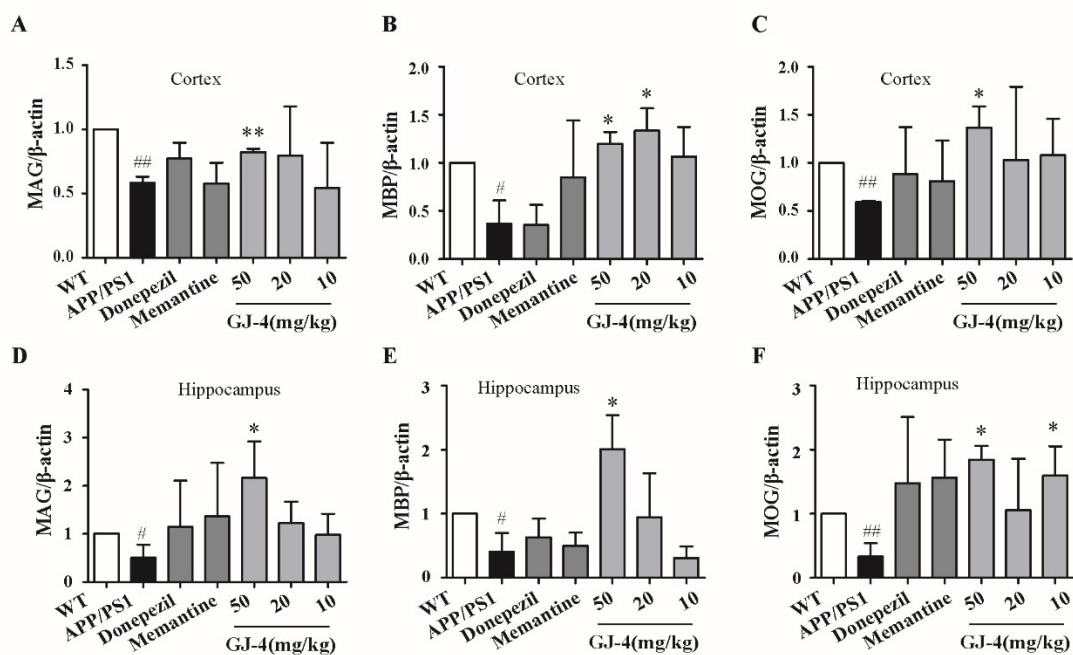

Fig. S1 GJ-4 treatment improved the expression of myelin-related protein in APP/PS1 mice. (A-C) Statistical analysis of MAG, MBP and MOG expression in the cortex; (D-F) Statistical analysis of MAG, MBP and MOG expression in the hippocampus. Data were presented as means  $\pm$  SD,  $n=3$ . # $p < 0.05$ , ## $p < 0.01$  vs. WT mice; \* $p < 0.05$  vs. APP/PS1 mice.
